# Supplementary material for: Inflammatory Pathways in Parkinson's Disease; A BNE Microarray Study
Source: Parkinsons Dis. 2012 Apr 2;2012:214714. doi: 10.1155/2012/214714 (PMC3324922; doi:10.1155/2012/214714)
Supplement: Supplementary file 1 — Supplementary Material 1: List of genes significantly (P < 0.001) dysregulated and of a fold change above 1.5 (Rosetta error model) with gene description, ontology, chip information and raw data on each gene. Supplemental Material 2: Full list of genes from our dataset that were also significantly dysregulated in another microarray study. [file 214714.f1.xlsx]

## Sheet: PD_1423_P01_FC1.5_ID_TTEST
Sequence ID	Symbol	Definition	Entrez_Gene_ID	Accession	Protein_Product	GI	Probe_Id	Array_Address_Id1	Probe_Type1	Probe_Start	Probe_Sequence1	Chromosome1	Probe_Chr_Orientation1	Probe_Coordinates1	Array_Address_Id2	Probe_Type2	Probe_Start2	Probe_Sequence2	Probe_Coordinates2	Cytoband	Symbol	Ontology_Component	Ontology_Process	Ontology_Function	Synonyms	Obsolete_Probe_Id	SymbolOld	GOList	GO Term List	Symbol	Intensity1:Control	Intensity2:Disease	Fold Change	P-value	Symbol	BNE_PD_Control_PDC05	BNE_PD_Control_PDC07	BNE_PD_Control_041/06	BNE_PD_Control_117/02	BNE_PD_Control_208/02	BNE_PD_Control_223/00	BNE_PD_Control_224/01a	BNE_PD_Control_224/01b	PD_Control:AVG	PD_Control:SD	BNE_PD_Disease_PD09	BNE_PD_Disease_PD13	BNE_PD_Disease_PD16	BNE_PD_Disease_PD22
1386129	AADACL1	Homo sapiens arylacetamide deacetylase-like 1 (AADACL1), mRNA.	57552	NM_020792.3	NP_065843.3	68051720	ILMN_1676336	5080431	S	3689	GGCAGGGTTCCTTCAATTGGCATTTTCCCCAGAATTGTGAGCCAAAGCCT	3	-	173831679-173831728						3q26.31b	AADACL1	Double layer of lipid molecules that encloses all cells, and, in eukaryotes, many organelles; may be a single or double lipid bilayer; also includes associated proteins [goid 16020] [evidence IEA]; Penetrating at least one phospholipid bilayer of a membrane. May also refer to the state of being buried in the bilayer with no exposure outside the bilayer. When used to describe a protein, indicates …	The chemical reactions and pathways, including anabolism and catabolism, by which living organisms transform chemical substances. Metabolic processes typically transform small molecules, but also include macromolecular processes such as DNA repair and replication, and protein synthesis and degradation [goid 8152] [evidence IEA]	Catalysis of the hydrolysis of various bonds, e.g. C-O, C-N, C-C, phosphoric anhydride bonds, etc. Hydrolase is the systematic name for any enzyme of EC class 3 [goid 16787] [evidence IEA]			AADACL1	3824	catalytic activity	AADACL1	1.27436	0.80571	-1.59623	0.00435	AADACL1	1733.33	1558.85	984.279	1641.33	2844.85	1573.9	1152.65	1145.17	1579.29	579.923	735.653	608.279	405.891	1407.42
1391589	ABCA10	Homo sapiens ATP-binding cassette, sub-family A (ABC1), member 10 (ABCA10), mRNA.	10349	NM_080282.2	NP_525021.2	27502428	ILMN_1753388	6550768	S	3458	GCTCAGATGATCCCTCCTACAATGGAGCCATCATAGTGTCTGGTGACCAG	17	-	64690413-64690462						17q24.3a	ABCA10	Double layer of lipid molecules that encloses all cells, and, in eukaryotes, many organelles; may be a single or double lipid bilayer; also includes associated proteins [goid 16020] [evidence IEA]; Penetrating at least one phospholipid bilayer of a membrane. May also refer to the state of being buried in the bilayer with no exposure outside the bilayer. When used to describe a protein, indicates …	The directed movement of substances (such as macromolecules, small molecules, ions) into, out of, within or between cells, or within a multicellular organism [goid 6810] [evidence IEA]	Interacting selectively with a nucleotide, any compound consisting of a nucleoside that is esterified with (ortho)phosphate or an oligophosphate at any hydroxyl group on the ribose or deoxyribose moiety [goid 166] [evidence IEA]; Interacting selectively with ATP, adenosine 5'-triphosphate, a universally important coenzyme and enzyme regulator [goid 5524] [evidence IEA]; Catalysis of the reaction:…	EST698739	EST698739	ABCA10	0016887; 000166; 0016301; 0005524	ATPase activity; nucleotide binding; kinase activity; ATP binding	ABCA10	0.05263	0.03271	-1.62355	0.00238	ABCA10	69.1876	55.2832	27.8908	50.6279	69.0491	96.3537	66.2767	61.0576	61.9658	19.4149	58.293	7.84088	8.53387	38.656
1396523	ABCA2	Homo sapiens ATP-binding cassette, sub-family A (ABC1), member 2 (ABCA2), transcript variant 1, mRNA.	20	NM_001606.3	NP_001597.2	45446739	ILMN_1747627	3520743	A	7864	GGGCGGAGCTGGGTCAGTCCCGTATTTATTTTGCTTTGAGAAGAGGCTCC	9	-	139021747-139021796						9q34.3e	ABCA2	The lipid bilayer surrounding the lysosome and separating its contents from the cell cytoplasm [goid 5765] [pmid 11309290] [evidence IDA]; A region in a eukaryotic cell, such as a centrosome or basal body, from which microtubules grow [goid 5815] [evidence ISS]; Double layer of lipid molecules that encloses all cells, and, in eukaryotes, many organelles; may be a single or double lipid bilayer; a…	Any process that modulates the frequency, rate or extent of transcription from an RNA polymerase II promoter [goid 6357] [pmid 15238223] [evidence IDA]; The chemical reactions and pathways involving lipids, compounds soluble in an organic solvent but not, or sparingly, in an aqueous solvent. Includes fatty acids; neutral fats, other fatty-acid esters, and soaps; long-chain (fatty) alcohols and wa…	Interacting selectively with a nucleotide, any compound consisting of a nucleoside that is esterified with (ortho)phosphate or an oligophosphate at any hydroxyl group on the ribose or deoxyribose moiety [goid 166] [pmid 12363033] [evidence RCA]; Interacting selectively with ATP, adenosine 5'-triphosphate, a universally important coenzyme and enzyme regulator [goid 5524] [evidence ISS]; Interactin…	ABC2	MGC129761; ABC2	ABCA2	0006810; 0006629; 0008203; 000166; 0042626; 0016887; 0005524; 0016021; 0043190; 0005765	transport; lipid metabolism; cholesterol metabolism; nucleotide binding; ATPase activity coupled to transmembrane movement of substances; ATPase activity; ATP binding; integral to membrane; ATP-binding cassette (ABC) transporter complex; lysosomal membrane	ABCA2	4.49292	7.91187	1.7449	0.00037	ABCA2	7247.15	8228.79	6101.78	8071.87	1730.98	5777.85	3897.79	3706.35	5595.32	2313.61	11618.4	15479.2	7920.78	9518.87
1381029	ABCC5	Homo sapiens ATP-binding cassette, sub-family C (CFTR/MRP), member 5 (ABCC5), transcript variant 2, mRNA.	10057	NM_001023587.1	NP_001018881.1	66529092	ILMN_1720535	1780170	A	613	GAGAGACTGTGGCAAGAAGAGCTGAATGAAGTTGGGCCAGACGCTGCTTC	3	-	185188345-185188394	7610097	I	1804	CCGTCGGAGACCAGATGACCTGTTAGATGGCTAGTCCTGTATAACTCGAC	185184354-185184403	3q27.1b	ABCC5	That fraction of cells, prepared by disruptive biochemical methods, that includes the plasma and other membranes [goid 5624] [pmid 15297306] [evidence IDA]; Penetrating at least one phospholipid bilayer of a plasma membrane. May also refer to the state of being buried in the bilayer with no exposure outside the bilayer [goid 5887] [pmid 9827529] [evidence TAS]; Double layer of lipid molecules tha…	The directed movement of substances (such as macromolecules, small molecules, ions) into, out of, within or between cells, or within a multicellular organism [goid 6810] [pmid 9827529] [evidence TAS]; The directed movement of substances (such as macromolecules, small molecules, ions) into, out of, within or between cells, or within a multicellular organism [goid 6810] [evidence IEA]	Interacting selectively with a nucleotide, any compound consisting of a nucleoside that is esterified with (ortho)phosphate or an oligophosphate at any hydroxyl group on the ribose or deoxyribose moiety [goid 166] [evidence IEA]; Interacting selectively with ATP, adenosine 5'-triphosphate, a universally important coenzyme and enzyme regulator [goid 5524] [pmid 9325169] [evidence TAS]; Catalysis o…	MOAT-C; pABC11; ABC33; MRP5; SMRP; EST277145; DKFZp686C1782; MOATC	MOAT-C; pABC11; ABC33; MRP5; SMRP; EST277145; DKFZp686C1782; MOATC	ABCC5	0006810; 000166; 0042626; 0016887; 0015239; 0008514; 0005524; 0005624; 0016021; 0005887	transport; nucleotide binding; ATPase activity coupled to transmembrane movement of substances; ATPase activity; multidrug transporter activity; organic anion transporter activity; ATP binding; membrane fraction; integral to membrane; integral to plasma membrane	ABCC5	0.89662	1.37683	1.52156	0.00376	ABCC5	1401.93	1914.87	840.823	958.761	797.309	872.072	930.262	971.095	1085.89	383.536	1854.47	2642.77	1475.98	1889.94
1378264	ABCD1	Homo sapiens ATP-binding cassette, sub-family D (ALD), member 1 (ABCD1), mRNA.	215	NM_000033.2	NP_000024.2	7262392	ILMN_1772189	5900524	S	3272	TCCCTATTCGTAGCCATCTCCGTGGCCAATGTGACTACCGTGCCAGCAGC	X	+	152663031-152663080						Xq28f	ABCD1	Double layer of lipid molecules that encloses all cells, and, in eukaryotes, many organelles; may be a single or double lipid bilayer; also includes associated proteins [goid 16020] [evidence IEA]; A small, membrane-bounded organelle that uses dioxygen (O2) to oxidize organic molecules; contains some enzymes that produce and others that degrade hydrogen peroxide (H2O2) [goid 5777] [evidence IEA];…	The directed movement of substances (such as macromolecules, small molecules, ions) into, out of, within or between cells, or within a multicellular organism [goid 6810] [evidence IEA]; The directed movement of substances (such as macromolecules, small molecules, ions) into, out of, within or between cells, or within a multicellular organism [goid 6810] [evidence IEA]; A process that is carried o…	Interacting selectively with a nucleotide, any compound consisting of a nucleoside that is esterified with (ortho)phosphate or an oligophosphate at any hydroxyl group on the ribose or deoxyribose moiety [goid 166] [evidence IEA]; Enables the directed movement of substances (such as macromolecules, small molecules, ions) into, out of, within or between cells [goid 5215] [pmid 8441467] [evidence NA…	ALD; AMN; ALDP; ABC42	ALD; AMN; ALDP; ABC42	ABCD1	0007031; 0006810; 0015919; 0042802; 000166; 0042626; 0016887; 0005215; 0005524; 0016021; 0016020; 0005777; 0005779	peroxisome organization and biogenesis; transport; peroxisomal membrane transport; protein self binding; nucleotide binding; ATPase activity coupled to transmembrane movement of substances; ATPase activity; transporter activity; ATP binding; integral to membrane; membrane; peroxisome; integral to peroxisomal membrane	ABCD1	0.06048	0.10197	1.67058	0.00141	ABCD1	112.377	70.2957	88.4014	73.4894	28.1949	49.3959	97.9697	57.4534	72.1972	27.3077	107.162	264.824	73.412	117.902
1383846	ABCG2	Homo sapiens ATP-binding cassette, sub-family G (WHITE), member 2 (ABCG2), mRNA.	9429	NM_004827.2	NP_004818.2	62526032	ILMN_1789641	2320711	S	4048	GCCCTGACACTGGTCATCTTGGAATTCATTTAGTTTGTCAGTGGGTGCCC	4	-	89230773-89230822						4q22.1b	ABCG2	The membrane surrounding a cell that separates the cell from its external environment. It consists of a phospholipid bilayer and associated proteins [goid 5886] [evidence IEA]; Penetrating at least one phospholipid bilayer of a membrane. May also refer to the state of being buried in the bilayer with no exposure outside the bilayer. When used to describe a protein, indicates that all or part of t…	The directed movement of substances (such as macromolecules, small molecules, ions) into, out of, within or between cells, or within a multicellular organism [goid 6810] [pmid 9850061] [evidence TAS]; A change in state or activity of a cell or an organism (in terms of movement, secretion, enzyme production, gene expression, etc.) as a result of a drug stimulus. A drug is a substance used in the d…	Interacting selectively with a nucleotide, any compound consisting of a nucleoside that is esterified with (ortho)phosphate or an oligophosphate at any hydroxyl group on the ribose or deoxyribose moiety [goid 166] [evidence IEA]; Enables the directed movement of substances (such as macromolecules, small molecules, ions) into, out of, within or between cells [goid 5215] [pmid 9861027] [evidence TA…	BCRP; BMDP; BCRP1; MXR; ABC15; ABCP; EST157481; MGC102821; MXR1; MRX; CDw338	BCRP; CD338; BMDP; BCRP1; MXR; ABC15; ABCP; EST157481; MGC102821; MXR1; MRX; CDw338	ABCG2	0006810; 0042493; 000166; 0016887; 0005215; 0008559; 0005524; 0016021; 00016020	transport; response to drug; nucleotide binding; ATPase activity; transporter activity; xenobiotic-transporting ATPase activity; ATP binding; integral to membrane; membrane	ABCG2	0.29584	0.53593	1.79504	0.00163	ABCG2	530.261	581.601	117.261	475.122	136.766	454.788	313.567	260.063	358.679	177.771	614.02	1319.08	707.223	640.491
1382995	ABTB1	Homo sapiens ankyrin repeat and BTB (POZ) domain containing 1 (ABTB1), transcript variant 2, mRNA.	80325	NM_172027.1	NP_742024.1	25777623	ILMN_1802096	5670424	A	1913	CCATTCAGGAAGGGCTGGGGGAGTGTGTGTGGCAATAAAGCTTGAAGGCA	3	+	128882396-128882445						3q21.3b	ABTB1	All of the contents of a cell excluding the plasma membrane and nucleus, but including other subcellular structures [goid 5737] [evidence IEA]	The chemical reactions and pathways resulting in the formation of a protein. This is a ribosome-mediated process in which the information in messenger RNA (mRNA) is used to specify the sequence of amino acids in the protein [goid 6412] [evidence IEA]	Functions in chain elongation during polypeptide synthesis at the ribosome [goid 3746] [evidence IEA]; Interacting selectively with any protein or protein complex (a complex of two or more proteins that may include other nonprotein molecules) [goid 5515] [evidence IEA]	BPOZ; PP2259; EF1ABP; MGC20585	BPOZ; PP2259; EF1ABP; MGC20585	ABTB1	0005515; 0003746	protein binding; translation elongation factor activity	ABTB1	0.623	0.95682	1.52182	0.00238	ABTB1	713.315	821.284	532.076	752.492	444.27	776.733	1029.68	955.823	753.209	195.89	1031.29	2110.28	1930.72	1388.5
1387814	ABTB2	Homo sapiens ankyrin repeat and BTB (POZ) domain containing 2 (ABTB2), mRNA.	25841	NM_145804.1	NP_665803.1	21956638	ILMN_1753370	3830327	S	3752	AAGAGGCCTTTCTGCTGTGTCCCCTCACGGCCTTGCCCTCGAATTCTGCA	11	-	34129458-34129507						11p13c	ABTB2	The part of a cell or its extracellular environment in which a gene product is located. A gene product may be located in one or more parts of a cell and its location may be as specific as a particular macromolecular complex, that is, a stable, persistent association of macromolecules that function together [goid 5575] [evidence ND ]	Any process that modulates the frequency, rate or extent of cell growth [goid 1558] [evidence NAS]	Elemental activities, such as catalysis or binding, describing the actions of a gene product at the molecular level. A given gene product may exhibit one or more molecular functions [goid 3674] [evidence ND ]; Interacting selectively with DNA (deoxyribonucleic acid) [goid 3677] [evidence IEA]; Interacting selectively with calcium ions (Ca2+) [goid 5509] [evidence IEA]; Interacting selectively wit…	DKFZP586C1619	DKFZP586C1619	ABTB2	0001558; 0006334; 0007001; 0005515; 0003677; 000786; 0005634	regulation of cell growth; nucleosome assembly; chromosome organization and biogenesis (sensu Eukaryota); protein binding; DNA binding; nucleosome; nucleus	ABTB2	0.31813	0.54048	1.68344	8e-05	ABTB2	577.089	671.255	417.207	388.352	166.212	297.075	271.015	299.357	385.945	167.25	773.535	895.117	827.118	785.829
1394569	ACHE	Homo sapiens acetylcholinesterase (YT blood group) (ACHE), transcript variant E4-E5, mRNA.	43	NM_015831.1	NP_056646.1	7710111	ILMN_1735471	730215	A	2854	CTGAGCTCCTCCCCGCGTGCCTTCGCCCTCTGGCTGCAAATAAACTGTTA	7	-	100325559-100325608	1050707	I	2410	ACATTCTCCTGATCCTCTTGCCACCGTCCCACGTGGTCGCCTGCATTTCT	100326003-100326052	7q22.1c	ACHE	The space external to the outermost structure of a cell. For cells without external protective or external encapsulating structures this refers to space outside of the plasma membrane. This term covers the host cell environment outside an intracellular parasite [goid 5576] [pmid 11283752] [evidence TAS]; A thin sheet of proteoglycans and glycoproteins, especially laminin, secreted by cells as an …	The chemical reactions and pathways resulting in the breakdown of acetylcholine that occurs in the synaptic cleft during synaptic transmission [goid 1507] [pmid 1517212] [evidence NAS]; The process whose specific outcome is the progression of an osteoblast over time, from its formation to the mature structure. Osteoblast development does not include the steps involved in committing a cranial neur…	Interacting selectively with beta-amyloid peptide/protein and/or its precursor [goid 1540] [pmid 11283752] [evidence TAS]; Catalysis of the reaction: acetylcholine + H2O = choline + acetate [goid 3990] [pmid 1517212] [evidence IMP]; Catalysis of the reaction: an acylcholine + H2O = choline + a carboxylic acid anion [goid 4104] [pmid 1517212] [evidence IDA]; Interacting selectively with collagen, …	YT	YT	ACHE	0008283; 0007155; 0009611; 0050714; 0001507; 0007416; 0007517; 0042135; 0042982; 0006260; 0004759; 0003990; 0016787; 0042166; 0001540; 0004104; 0042803; 0005605; 0045202; 0005576; 00016020	cell proliferation; cell adhesion; response to wounding; positive regulation of protein secretion; acetylcholine catabolism in synaptic cleft; synaptogenesis; muscle development; neurotransmitter catabolism; amyloid precursor protein metabolism; DNA replication; serine esterase activity; acetylcholinesterase activity; hydrolase activity; acetylcholine binding; beta-amyloid binding; cholinesterase…	ACHE	0.14038	0.07768	-1.82394	1e-05	ACHE	108.95	105.49	118.359	207.476	206.035	215.502	201.01	173.343	167.021	48.1525	85.478	62.8472	54.1401	111.494
1381832	ACOT7	Homo sapiens acyl-CoA thioesterase 7 (ACOT7), transcript variant hBACHd, mRNA.	11332	NM_181866.2	NP_863656.1	75709215	ILMN_1740265	2360520	A	1352	CCGAGCACGCTGTAGGGTATGGGAAGAACCCAGCACCACTAATAAAGCTG	1	-	6246931-6246980	2260220	I	68	TCTGCATCTGATCCTGGGATGTCCTAGCCACCATGGCTTTCCAGCTGAGC	6341474-6341492:6341493-6341523	1p36.31a	ACOT7	All of the contents of a cell excluding the plasma membrane and nucleus, but including other subcellular structures [goid 5737] [pmid 10578051] [evidence TAS]; A semiautonomous, self replicating organelle that occurs in varying numbers, shapes, and sizes in the cytoplasm of virtually all eukaryotic cells. It is notably the site of tissue respiration [goid 5739] [evidence IEA]	The chemical reactions and pathways involving lipids, compounds soluble in an organic solvent but not, or sparingly, in an aqueous solvent. Includes fatty acids; neutral fats, other fatty-acid esters, and soaps; long-chain (fatty) alcohols and waxes; sphingoids and other long-chain bases; glycolipids, phospholipids and sphingolipids; and carotenes, polyprenols, sterols, terpenes and other isopren…	Interacting selectively with acyl-CoA, any derivative of coenzyme A in which the sulfhydryl group is in thiolester linkage with a fatty acyl group [goid 62] [pmid 10578051] [evidence TAS]; Catalysis of the reaction: a carboxylic ester + H2O = an alcohol + a carboxylic anion [goid 4091] [evidence IEA]; Catalysis of the reaction: palmitoyl-CoA + H2O = CoA + palmitate [goid 16290] [evidence IEA]; Ca…	hBACH; LACH1; RP1-120G22.10; MGC1126; LACH; BACH; ACH1; ACT; CTE-II	hBACH; LACH1; RP1-120G22.10; MGC1126; LACH; BACH; ACH1; ACT; CTE-II	ACOT7	0006629; 0016290; 0016787; 0004759; 00062; 0005737	lipid metabolism; palmitoyl-CoA hydrolase activity; hydrolase activity; serine esterase activity; acyl-CoA binding; cytoplasm	ACOT7	4.59198	2.58717	-1.79124	0.00043	ACOT7	5359.86	4086.08	2784.74	7994.18	9109.99	7450.57	5533	5296.3	5951.84	2099.61	2630.94	1965.45	1252.12	3484.19
1383691	ACSL6	Homo sapiens acyl-CoA synthetase long-chain family member 6 (ACSL6), transcript variant 1, mRNA.	23305	NM_015256.2	NP_056071.2	57165409	ILMN_1737418	2260368	A	1966	TTTGGTAGGCATTGTTGTGCCTGACCCTGAAGTTATGCCCTCCTGGGCCC	5	-	131324158-131324207						5q31.1b	ACSL6	A semiautonomous, self replicating organelle that occurs in varying numbers, shapes, and sizes in the cytoplasm of virtually all eukaryotic cells. It is notably the site of tissue respiration [goid 5739] [evidence IEA]; The outer, i.e. cytoplasm-facing, lipid bilayer of the mitochondrial envelope [goid 5741] [evidence NAS]; A small, membrane-bounded organelle that uses dioxygen (O2) to oxidize or…	The chemical reactions and pathways involving lipids, compounds soluble in an organic solvent but not, or sparingly, in an aqueous solvent. Includes fatty acids; neutral fats, other fatty-acid esters, and soaps; long-chain (fatty) alcohols and waxes; sphingoids and other long-chain bases; glycolipids, phospholipids and sphingolipids; and carotenes, polyprenols, sterols, terpenes and other isopren…	Interacting selectively with magnesium (Mg) ions [goid 287] [evidence IEA]; Catalysis of the reaction: ATP + a long-chain carboxylic acid + CoA = AMP + diphosphate + an acyl-CoA; long-chain fatty acids have chain lengths of C12-18 [goid 4467] [evidence IEA]; Catalysis of the reaction: ATP + a long-chain carboxylic acid + CoA = AMP + diphosphate + an acyl-CoA; long-chain fatty acids have chain len…	FACL6; ACS2; KIAA0837; LACS5; LACS2; FLJ16173	FACL6; ACS2; KIAA0837; LACS5; LACS2; FLJ16173	ACSL6	0008152; 0006629; 0006637; 000287; 0004467; 0003824; 0016874; 0005778; 0005792; 0016021; 0005741; 0005886	metabolism; lipid metabolism; acyl-CoA metabolism; magnesium ion binding; long-chain-fatty-acid-CoA ligase activity; catalytic activity; ligase activity; peroxisomal membrane; microsome; integral to membrane; mitochondrial outer membrane; plasma membrane	ACSL6	0.26172	0.11516	-2.29362	2e-05	ACSL6	387.063	245.33	280.149	303.819	511.333	331.216	212.308	234.319	313.192	97.9979	101.781	40.7918	71.9515	139.607
1389728	ACTC	Homo sapiens actin, alpha, cardiac muscle (ACTC), mRNA.	70	NM_005159.3	NP_005150.1	46411161	ILMN_1658660	1030471	S	1105	GGTATTGCTGATCGTATGCAGAAGGAAATCACTGCTCTGGCTCCTAGCAC	15	-	32870619-32870668						15q14a	ACTC				CMD1R	ACTC; CMD1R	ACTC	000166; 0005515; 0005524; 0005200; 0005856; 0005884	nucleotide binding; protein binding; ATP binding; structural constituent of cytoskeleton; cytoskeleton; actin filament	ACTC	0.17457	0.0816	-2.15888	0.00519	ACTC	171.373	107.895	73.3494	233.606	280.02	467.54	160.265	175.987	208.754	123.054	65.1262	41.3066	20.4481	77.7346
1378320	ACTN2	Homo sapiens actinin, alpha 2 (ACTN2), mRNA.	88	NM_001103.1	NP_001094.1	4501892	ILMN_1654422	5310592	S	3953	GTGCGGTGTGTGTTCACCCCTGGGATTGGACAGTGTATCCTAACAAGTCC	1	+	234993635-234993684						1q43a	ACTN2	A small, dense body one or more of which are present in the nucleus of eukaryotic cells. It is rich in RNA and protein, is not bounded by a limiting membrane, and is not seen during mitosis. Its prime function is the transcription of the nucleolar DNA into 45S ribosomal-precursor RNA, the processing of this RNA into 5.8S, 18S, and 28S components of ribosomal RNA, and the association of these comp…	The attachment of a cell, either to another cell or to an underlying substrate such as the extracellular matrix, via cell adhesion molecules [goid 7155] [pmid 10656685] [evidence TAS]; Formation of a microspike, a thin, stiff projection extended from the surface of a migrating cell [goid 30035] [pmid 12356918] [evidence IDA]; Any process that modulates the occurrence or rate of cell death by apop…	Interacting selectively with monomeric or multimeric forms of actin, including actin filaments [goid 3779] [evidence IEA]; Interacting selectively with an integrin [goid 5178] [pmid 8104223] [evidence TAS]; Interacting selectively with calcium ions (Ca2+) [goid 5509] [evidence IEA]; The action of a molecule that contributes to the structural integrity of a muscle fiber [goid 8307] [pmid 1339456] …			ACTN2	0051289; 0046983; 0003779; 0042802; 0005509; 0051374; 0008307; 0051370; 0005856; 0005884	protein homotetramerization; protein dimerization activity; actin binding; protein self binding; calcium ion binding; FATZ 1 binding; structural constituent of muscle; ZASP binding; cytoskeleton; actin filament	ACTN2	0.15319	0.29407	1.90215	7.78878e-06	ACTN2	274.722	338.261	171.721	186.747	101.545	177.018	148.034	116.812	189.358	79.8311	504.009	455.684	209.36	378.854
1387458	ACTN4	Homo sapiens actinin, alpha 4 (ACTN4), mRNA.	81	NM_004924.3	NP_004915.2	34452697	ILMN_1725534	4050139	S	3314	AGGAGATGGCCCCAACAAGCACCCCGCTTTTGCAGCAGAGGAGCTGAGTT	19	+	43912431-43912480						19q13.2a	ACTN4	Bundle of microfilaments and other proteins found in fibroblasts [goid 1725] [evidence IEA]; A membrane-bounded organelle of eukaryotic cells in which chromosomes are housed and replicated. In most cells, the nucleus contains all of the cell's chromosomes except the organellar chromosomes, and is the site of RNA synthesis and processing. In some species, or in specialized cell types, RNA metaboli…	Any process that activates or increases the activity of a sodium:hydrogen antiporter, which catalyzes the reaction: Na+(out) + H+(in) = Na+(in) + H+(out) [goid 32417] [pmid 11948184] [evidence NAS]; Any process that modulates the occurrence or rate of cell death by apoptosis [goid 42981] [pmid 16807302] [evidence NAS]; Any process that activates, maintains or increases the rate of pinocytosis. Pi…	Interacting selectively with a nucleoside, a compound consisting of a purine or pyrimidine nitrogenous base linked either to ribose or deoxyribose [goid 1882] [pmid 12411747] [evidence IDA]; Interacting selectively with an integrin [goid 5178] [pmid 8104223] [evidence TAS]; Interacting selectively with calcium ions (Ca2+) [goid 5509] [evidence IEA]; Interacting selectively with any protein or pro…	DKFZp686K23158; FSGS1; FSGS	DKFZp686K23158; FSGS1; FSGS	ACTN4	0051017; 0006928; 0003779; 0005509; 0005200; 0015629; 0005737; 0005634	actin filament bundle formation; cell motility; actin binding; calcium ion binding; structural constituent of cytoskeleton; actin cytoskeleton; cytoplasm; nucleus	ACTN4	1.68792	3.20594	1.88202	1.54406e-07	ACTN4	2462.11	2682.8	1853.16	2489.03	1185.48	2398.09	1833.82	1719.11	2077.95	509.943	3855.96	6976.89	3848.8	4070.62
1380104	ADAM15	Homo sapiens ADAM metallopeptidase domain 15 (ADAM15), transcript variant 4, mRNA.	8751	NM_207195.1	NP_997078.1	46909595	ILMN_1756920	1990280	A	2823	CGGGATTGAGGAAGGTCCGCACAGCCTGTCTCTGCTCAGTTGCAATAAAC	1	+	153301807-153301856						1q21.3e-q22a	ADAM15	Double layer of lipid molecules that encloses all cells, and, in eukaryotes, many organelles; may be a single or double lipid bilayer; also includes associated proteins [goid 16020] [evidence IEA]; Penetrating at least one phospholipid bilayer of a membrane. May also refer to the state of being buried in the bilayer with no exposure outside the bilayer. When used to describe a protein, indicates …	The hydrolysis of a peptide bond or bonds within a protein [goid 6508] [evidence IEA]; The hydrolysis of a peptide bond or bonds within a protein [goid 6508] [evidence IEA]; The hydrolysis of a peptide bond or bonds within a protein [goid 6508] [evidence IEA]; The hydrolysis of a peptide bond or bonds within a protein [goid 6508] [evidence IEA]; The hydrolysis of a peptide bond or bonds within a …	Catalysis of the hydrolysis of internal, alpha-peptide bonds in a polypeptide chain by a mechanism in which water acts as a nucleophile, one or two metal ions hold the water molecule in place, and charged amino acid side chains are ligands for the metal ions [goid 4222] [evidence IEA]; Catalysis of the hydrolysis of internal, alpha-peptide bonds in a polypeptide chain by a mechanism in which wate…	MDC15	MDC15	ADAM15	0007160; 0007155; 0006508; 0046872; 0005515; 0004222; 0008270; 0017124; 0016021; 00016020	cell-matrix adhesion; cell adhesion; proteolysis and peptidolysis; metal ion binding; protein binding; metalloendopeptidase activity; zinc ion binding; SH3 domain binding; integral to membrane; membrane	ADAM15	2.93247	4.61979	1.56102	3e-05	ADAM15	3206.92	2873.88	3458.43	4519.45	3436.52	4470.43	3968.78	4105.61	3755	601.308	6492.3	9134.45	6116	4298.5
1382107	ADAM23	Homo sapiens ADAM metallopeptidase domain 23 (ADAM23), mRNA.	8745	NM_003812.2	NP_003803.1	73765550	ILMN_1785165	6980491	S	2820	CCTTTGGGTGGTAATGACTACGGAGCTAAAGTTGGGGTGACAAGGATGGG	2	+	207190694-207190743						2q33.3b	ADAM23	The space external to the outermost structure of a cell. For cells without external protective or external encapsulating structures this refers to space outside of the plasma membrane. This term covers the host cell environment outside an intracellular parasite [goid 5576] [evidence IEA]; The membrane surrounding a cell that separates the cell from its external environment. It consists of a phosp…	The hydrolysis of a peptide bond or bonds within a protein [goid 6508] [evidence IEA]; The attachment of a cell, either to another cell or to an underlying substrate such as the extracellular matrix, via cell adhesion molecules [goid 7155] [evidence IEA]; The process whose specific outcome is the progression of the central nervous system over time, from its formation to the mature structure. The …	Catalysis of the hydrolysis of internal, alpha-peptide bonds in a polypeptide chain by a mechanism in which water acts as a nucleophile, one or two metal ions hold the water molecule in place, and charged amino acid side chains are ligands for the metal ions [goid 4222] [evidence IEA]; Interacting selectively with an integrin [goid 5178] [pmid 9693107] [evidence TAS]; Interacting selectively with…	MDC3	MDC3	ADAM23	0006508; 0007155; 0007417; 0004222; 0005178; 0005515; 0005887	proteolysis and peptidolysis; cell adhesion; central nervous system development; metalloendopeptidase activity; integrin binding; protein binding; integral to plasma membrane	ADAM23	0.89016	0.58859	-1.52627	0.00111	ADAM23	1176.12	1000.94	658.569	1118.93	1733.48	1353.6	898.537	801.862	1092.75	339.221	652.855	593.115	376.807	777.292
1396984	ADARB2	Homo sapiens adenosine deaminase, RNA-specific, B2 (RED2 homolog rat) (ADARB2), mRNA.	105	NM_018702.1	NP_061172.1	8922076	ILMN_1749493	6860274	S	3460	GTCCGTCATGGCGTTTGGTTTATGGTGGCCGATACTAAGAGCCACTGAGG	10	-	1218169-1218218						10p15.3c-p15.3b	ADARB2	The living contents of a cell; the matter contained within (but not including) the plasma membrane, usually taken to exclude large vacuoles and masses of secretory or ingested material. In eukaryotes it includes the nucleus and cytoplasm [goid 5622] [evidence IEA]; A membrane-bounded organelle of eukaryotic cells in which chromosomes are housed and replicated. In most cells, the nucleus contains …	Any process involved in the conversion of a primary mRNA transcript into one or more mature mRNA(s) prior to translation into polypeptide [goid 6397] [evidence IEA]; Any process involved in the conversion of one or more primary RNA transcripts into one or more mature RNA molecules [goid 6396] [evidence IEA]; Any process involved in the conversion of one or more primary RNA transcripts into one or…	Interacting selectively with double-stranded RNA [goid 3725] [pmid 10836796] [evidence TAS]; Interacting selectively with single-stranded RNA [goid 3727] [pmid 10836796] [evidence TAS]; Catalysis of the reaction: adenosine + H2O = inosine + NH3 [goid 4000] [pmid 10836796] [evidence TAS]; Interacting selectively with zinc (Zn) ions [goid 8270] [evidence IEA]; Catalysis of the hydrolysis of various…	hRED2; RED2; FLJ25034; FLJ36975; ADAR3	hRED2; RED2; FLJ25034; FLJ36975; ADAR3	ADARB2	0006396; 0006397; 0006381; 0003725; 0046872; 0016787; 0003727; 0003723; 0004000; 0005634	RNA processing; mRNA processing; mRNA editing; double-stranded RNA binding; metal ion binding; hydrolase activity; single-stranded RNA binding; RNA binding; adenosine deaminase activity; nucleus	ADARB2	0.80745	1.26256	1.54937	0.00769	ADARB2	844.072	1173.33	871.955	1165.07	447.196	476.794	1400.22	1496.09	984.343	393.095	1977.51	2256.8	2539.71	1577.51
1380440	ADAT3	Homo sapiens adenosine deaminase, tRNA-specific 3, TAD3 homolog (S. cerevisiae) (ADAT3), mRNA.	113179	NM_138422.1	NP_612431.1	19923944	ILMN_1806275	7210093	S	1339	CTGGACTTCCGGGCCTCGATTTCTTCCGCACAAGCCTGACCGTGGATTTC	19	+	1864205-1864254						19p13.3h	ADAT3		The process by which a pre-tRNA molecule is converted to a mature tRNA, ready for addition of an aminoacyl group [goid 8033] [evidence IEA]	Interacting selectively with zinc (Zn) ions [goid 8270] [evidence IEA]; Catalysis of the hydrolysis of various bonds, e.g. C-O, C-N, C-C, phosphoric anhydride bonds, etc. Hydrolase is the systematic name for any enzyme of EC class 3 [goid 16787] [evidence IEA]; Interacting selectively with any metal ion [goid 46872] [evidence IEA]	TAD3; S863-5; MSTP121; FWP005; MST121	TAD3; S863-5; MSTP121; FWP005; MST121	LOC113179	0008270; 0016787	zinc ion binding; hydrolase activity	ADAT3	0.08962	0.1449	1.60215	0.00041	ADAT3	134.202	153.152	118.79	113.706	108.67	110.357	55.058	88.5075	110.305	29.3271	150.811	337.42	120.759	186.533
1384926	ADCY4	Homo sapiens adenylate cyclase 4 (ADCY4), mRNA.	196883	NM_139247.2	NP_640340.2	24497586	ILMN_1677893	4230653	S	3172	CAGCTCTGCACCTACTTCCTGAACACAGACTTGACACGAACTGGACCTCC	14	-	23857480-23857529						14q12a	ADCY4	The living contents of a cell; the matter contained within (but not including) the plasma membrane, usually taken to exclude large vacuoles and masses of secretory or ingested material. In eukaryotes it includes the nucleus and cytoplasm [goid 5622] [evidence IEA]; Double layer of lipid molecules that encloses all cells, and, in eukaryotes, many organelles; may be a single or double lipid bilayer…	The chemical reactions and pathways resulting in the formation of the nucleotide cAMP (cyclic AMP, adenosine 3',5'-cyclophosphate) [goid 6171] [evidence IEA]; The series of molecular signals generated as a consequence of a G-protein coupled receptor binding to its physiological ligand, followed by modulation of adenylyl cyclase activity and a subsequent change in the concentration of cyclic AMP […	Interacting selectively with magnesium (Mg) ions [goid 287] [evidence IEA]; Catalysis of the reaction: ATP = 3',5'-cyclic AMP + diphosphate [goid 4016] [evidence IEA]; Catalysis of the reaction: ATP = 3',5'-cyclic AMP + diphosphate [goid 4016] [evidence IEA]			ADCY4	0006171; 0007242; 000287; 0004016; 0016020; 0016021	cAMP biosynthesis; intracellular signaling cascade; magnesium ion binding; adenylate cyclase activity; membrane; integral to membrane	ADCY4	0.3698	0.61261	1.64149	0.00931	ADCY4	689.034	583.049	240.046	276.946	422.024	432.534	430.192	472.475	443.287	146.625	618.956	1431.76	651.457	763.322
1378266	ADH1A	Homo sapiens alcohol dehydrogenase 1A (class I), alpha polypeptide (ADH1A), mRNA.	124	NM_000667.2	NP_000658.1	11496886	ILMN_1764309	6020441	S	1207	CAGATGTTTTCCCTTGTGGCAGTCTTCAGCCTCCTCTACCCTACATGATC	4	-	100416746-100416795						4q23b	ADH1A	All of the contents of a cell excluding the plasma membrane and nucleus, but including other subcellular structures [goid 5737] [evidence NAS]; That part of the cytoplasm that does not contain membranous or particulate subcellular components [goid 5829] [pmid 9982] [evidence EXP]	The chemical reactions and pathways involving alcohols, any of a class of compounds containing one or more hydroxyl groups attached to a saturated carbon atom, as carried out by individual cells [goid 6066] [pmid 2347582] [evidence NAS]; The process of removal or addition of one or more electrons with or without the concomitant removal or addition of a proton or protons [goid 55114] [evidence IEA]	Catalysis of the reaction: an alcohol + NAD+ = an aldehyde or ketone + NADH + H+ requiring the presence of zinc [goid 4024] [pmid 2935875] [evidence NAS]; Catalysis of the reaction: an alcohol + NAD+ = an aldehyde or ketone + NADH + H+ requiring the presence of zinc [goid 4024] [pmid 9982] [evidence EXP]; The selective, often stoichiometric, interaction of a molecule with one or more specific sit…	ADH1	ADH1	ADH1A	0006066; 0046872; 0008270; 0016491; 0004024; 0005737	alcohol metabolism; metal ion binding; zinc ion binding; oxidoreductase activity; alcohol dehydrogenase activity zinc-dependent; cytoplasm	ADH1A	0.13746	0.30011	2.16328	2.833e-06	ADH1A	153.981	376.217	143.871	68.3796	50.5621	168.315	186.563	201.321	168.651	99.4991	326.714	341.198	444.02	319.269
1384105	ADNP	Homo sapiens activity-dependent neuroprotector homeobox (ADNP), transcript variant 1, mRNA.	23394	NM_015339.2	NP_056154.1	31563504	ILMN_1666019	2370022	I	249	GTGGCCTAGTGGTTATGCCCTGTACTACCATTTTGAGGATCTGGACTCCG	20	-	48978636-48978685						20q13.13f	ADNP	The living contents of a cell; the matter contained within (but not including) the plasma membrane, usually taken to exclude large vacuoles and masses of secretory or ingested material. In eukaryotes it includes the nucleus and cytoplasm [goid 5622] [evidence IEA]; A membrane-bounded organelle of eukaryotic cells in which chromosomes are housed and replicated. In most cells, the nucleus contains …	The synthesis of either RNA on a template of DNA or DNA on a template of RNA [goid 6350] [evidence IEA]; Any process that modulates the frequency, rate or extent of DNA-dependent transcription [goid 6355] [evidence IEA]	The function of binding to a specific DNA sequence in order to modulate transcription. The transcription factor may or may not also interact selectively with a protein or macromolecular complex [goid 3700] [evidence IEA]; Interacting selectively with ATP, adenosine 5'-triphosphate, a universally important coenzyme and enzyme regulator [goid 5524] [evidence IEA]; Interacting selectively with zinc …	ADNP1; KIAA0784	ADNP1; KIAA0784	ADNP	0006355; 0046872; 0008270; 0003700; 0005634	regulation of transcription DNA-dependent; metal ion binding; zinc ion binding; transcription factor activity; nucleus	ADNP	0.10501	0.16684	1.57428	0.00548	ADNP	213.521	260.048	106.709	144.295	77.8522	124.913	60.1484	59.3523	130.855	72.943	307.499	155.921	182.659	202.591
1380058	ADORA3	Homo sapiens adenosine A3 receptor (ADORA3), transcript variant 2, mRNA.	140	NM_000677.2	NP_000668.1	6031156	ILMN_1730710	5700561	I	1756	CCTTCAGATTCCCCATCAACAAACACTTGAGGGCCTGTATGCCTGGGCCA	1	-	111844013-111844062						1p13.2d	ADORA3	The membrane surrounding a cell that separates the cell from its external environment. It consists of a phospholipid bilayer and associated proteins [goid 5886] [evidence IEA]; Penetrating at least one phospholipid bilayer of a plasma membrane. May also refer to the state of being buried in the bilayer with no exposure outside the bilayer [goid 5887] [pmid 8399349] [evidence TAS]	The immediate defensive reaction (by vertebrate tissue) to infection or injury caused by chemical or physical agents. The process is characterized by local vasodilation, extravasation of plasma into intercellular spaces and accumulation of white blood cells and macrophages [goid 6954] [pmid 9164961] [evidence TAS]; The cascade of processes by which a signal interacts with a receptor, causing a ch…	Combining with an extracellular or intracellular messenger to initiate a change in cell activity [goid 4872] [evidence IEA]; Combining with an extracellular or intracellular messenger to initiate a change in cell activity [goid 4872] [evidence IEA]; Combining with an extracellular or intracellular messenger to initiate a change in cell activity [goid 4872] [evidence IEA]; Combining with adenosine…	AD026; RP11-552M11.7; A3AR; bA552M11.5	AD026; RP11-552M11.7; A3AR; bA552M11.5	ADORA3	0007165; 0007186; 0007190; 0008016; 0006954; 0001613; 0004872; 0001584; 0016020; 0005887	signal transduction; G-protein coupled receptor protein signaling pathway; adenylate cyclase activation; regulation of heart contraction rate; inflammatory response; A3 adenosine receptor activity G-protein coupled; receptor activity; rhodopsin-like receptor activity; membrane; integral to plasma membrane	ADORA3	0.41958	1.05934	2.50173	3e-05	ADORA3	580.506	983.865	726.099	543.753	333.258	228.467	360.367	315.724	509.005	252.977	2338.15	299.425	675.783	639.202
1385465	AFAP1L1	Homo sapiens actin filament associated protein 1-like 1 (AFAP1L1), mRNA.	134265	NM_152406.1	NP_689619.1	55742688	ILMN_1694140	1400170	S	3763	GCCTCTAATGACCAGCTGGGTGACCTTGGGAAAGTCACTTGATTGCTCTG	5	+	148701168-148701217						5q33.1b	AFAP1L1			Interacting selectively with any protein or protein complex (a complex of two or more proteins that may include other nonprotein molecules) [goid 5515] [pmid 17353931] [evidence IPI]	FLJ36748; MGC149773	FLJ36748; MGC149773	FLJ36748	0007018; 0051258; 0005198; 0003924; 0005525; 0043234; 0005874	microtubule-based movement; protein polymerization; structural molecule activity; GTPase activity; GTP binding; protein complex; microtubule	AFAP1L1	0.05457	0.09538	1.73209	0.00042	AFAP1L1	101.845	74.0531	43.5754	57.882	52.8924	66.1454	59.848	63.6413	64.9853	17.4252	107.55	188.89	70.1093	97.4321
1386637	AFAP1L2	Homo sapiens actin filament associated protein 1-like 2 (AFAP1L2), transcript variant 1, mRNA.	84632	NM_001001936.1	NP_001001936.1	50897849	ILMN_1730995	4040309	A	3699	GTGATCGCCCTCTTAAAATTGGCAGTGCTGTTCCTTGTGCTGCCCCTGTC	10	-	116044800-116044849						10q25.3a	AFAP1L2	All of the contents of a cell excluding the plasma membrane and nucleus, but including other subcellular structures [goid 5737] [pmid 17412687] [evidence IDA]	The immediate defensive reaction (by vertebrate tissue) to infection or injury caused by chemical or physical agents. The process is characterized by local vasodilation, extravasation of plasma into intercellular spaces and accumulation of white blood cells and macrophages [goid 6954] [pmid 17412687] [evidence IDA]; Any process that modulates the rate or extent of progress through the mitotic cel…	Interacting selectively with a SH3 domain (Src homology 3) of a protein, small protein modules containing approximately 50 amino acid residues found in a great variety of intracellular or membrane-associated proteins [goid 17124] [pmid 17412687] [evidence IPI]; Increases the activity of a protein tyrosine kinase, an enzyme which phosphorylates a tyrosyl phenolic group on a protein [goid 30296] [p…	XB130; FLJ14564	XB130; KIAA1914; FLJ14564	KIAA1914	0008283; 0006401; 0009615; 000738; 0030145; 0046872; 0008310; 000175; 0004527; 0016787; 0008859; 0003723; 0005654; 0016605; 0005622; 005634	cell proliferation; RNA catabolism; response to virus; DNA catabolism exonucleolytic; manganese ion binding; metal ion binding; single-stranded DNA specific 3'-5' exodeoxyribonuclease activity; 3'-5'-exoribonuclease activity; exonuclease activity; hydrolase activity; exoribonuclease II activity; RNA binding; nucleoplasm; PML body; intracellular; nucleus	AFAP1L2	1.10025	1.93313	1.74096	0.00013	AFAP1L2	1441	1731.18	1156.39	1255.78	518.659	1590.53	1577.77	1470.3	1342.7	380.761	1570.8	3559.64	4384.05	2054.59
1387388	AFAR3	Homo sapiens aflatoxin B1 aldehyde reductase 3 (AFAR3), mRNA.	246181	NM_201252.1	NP_957704.1	41152111	ILMN_1702696	6760162	S	1817	GTACTTGCCTAGGACTGGGAGGAGGATTGCGAGGAAATGGAGATTCACTG	1	-	19465180-19465229						1p36.13b	AFAR3				AKR7A4	AKR7A4	AFAR3	0016491; 0005795	oxidoreductase activity; Golgi stack	AFAR3	0.03398	0.05627	1.64077	0.00431	AFAR3	48.4087	55.7647	38.6901	31.0537	49.7523	30.2946	17.7496	20.4767	36.5238	13.9891	38.1002	52.3156	59.0078	91.3155
1394724	AFF2	Homo sapiens AF4/FMR2 family, member 2 (AFF2), mRNA.	2334	NM_002025.1	NP_002016.1	4503766	ILMN_1725889	3460021	S	13595	GGCTGAGCTGGTGCGTTGGTTTCTCTCATAGAGGCATTAACTATACTGCC	X	+	147889800-147889849						Xq28a	AFF2	A membrane-bounded organelle of eukaryotic cells in which chromosomes are housed and replicated. In most cells, the nucleus contains all of the cell's chromosomes except the organellar chromosomes, and is the site of RNA synthesis and processing. In some species, or in specialized cell types, RNA metabolism or DNA replication may be absent [goid 5634] [pmid 18029348] [evidence IDA]; All of the co…	The process whose specific outcome is the progression of the brain over time, from its formation to the mature structure. The brain is one of the two components of the central nervous system and is the center of thought and emotion. It is responsible for the coordination and control of bodily activities and the interpretation of information from the senses (sight, hearing, smell, etc.) [goid 7420…		FMR2; MRX2; OX19; FRAXE	FMR2; MRX2; OX19; FRAXE	AFF2	0007611; 0007420	learning and/or memory; brain development	AFF2	1.14754	0.58172	-1.99083	9e-05	AFF2	1492.78	1319.12	595.094	1857.96	2305.95	1571.2	1139.2	1037.07	1414.8	523.832	663.852	338.61	98.5153	1245.23
1384970	AFF3	Homo sapiens AF4/FMR2 family, member 3 (AFF3), transcript variant 1, mRNA.	3899	NM_002285.2	NP_002276.2	68348713	ILMN_1775235	630521	A	7960	GTAGATTCCCAAGAGACTTTAGCAGTCACCAGCCTTAATGCATGTACAGG	2	-	99530275-99530324	5960731	I	2	GCCAGCGAGAAGAGAGCTCCACGCTCAGCCTCAGAAGAAAGACGTTCAAC	100125418-100125467	2q11.2c-q11.2d	AFF3	A membrane-bounded organelle of eukaryotic cells in which chromosomes are housed and replicated. In most cells, the nucleus contains all of the cell's chromosomes except the organellar chromosomes, and is the site of RNA synthesis and processing. In some species, or in specialized cell types, RNA metabolism or DNA replication may be absent [goid 5634] [pmid 8555498] [evidence TAS]	The synthesis of either RNA on a template of DNA or DNA on a template of RNA [goid 6350] [evidence IEA]; Any process that modulates the frequency, rate or extent of DNA-dependent transcription [goid 6355] [evidence IEA]; The biological process whose specific outcome is the progression of a multicellular organism over time from an initial condition (e.g. a zygote or a young adult) to a later condi…	Interacting selectively with DNA (deoxyribonucleic acid) [goid 3677] [evidence IEA]	MLLT2-like; LAF4	MLLT2-like; LAF4	AFF3	0006355; 0006350; 0007275; 0003824; 0003677; 0005634	regulation of transcription DNA-dependent; transcription; development; catalytic activity; DNA binding; nucleus	AFF3	1.10523	0.65096	-1.71348	2.09703e-06	AFF3	1231.56	1367.03	718.527	1577.77	1588.91	1672.77	1464.2	1255.62	1359.55	304.123	747.009	776.617	391.742	1388.65
1384901	AFF3	Homo sapiens AF4/FMR2 family, member 3 (AFF3), transcript variant 2, mRNA.	3899	NM_001025108.1	NP_001020279.1	68348715	ILMN_1677951	7550341	I	221	GGAATGACTCTCTAGTTGTGGAATTTCAGTCATCAGCCAGCAGATGCAGG	2	-	99994392-99994441						2q11.2c-q11.2d	AFF3	A membrane-bounded organelle of eukaryotic cells in which chromosomes are housed and replicated. In most cells, the nucleus contains all of the cell's chromosomes except the organellar chromosomes, and is the site of RNA synthesis and processing. In some species, or in specialized cell types, RNA metabolism or DNA replication may be absent [goid 5634] [pmid 8555498] [evidence TAS]	The synthesis of either RNA on a template of DNA or DNA on a template of RNA [goid 6350] [evidence IEA]; Any process that modulates the frequency, rate or extent of DNA-dependent transcription [goid 6355] [evidence IEA]; The biological process whose specific outcome is the progression of a multicellular organism over time from an initial condition (e.g. a zygote or a young adult) to a later condi…	Interacting selectively with DNA (deoxyribonucleic acid) [goid 3677] [evidence IEA]	MLLT2-like; LAF4	MLLT2-like; LAF4	AFF3	0006355; 0006350; 0007275; 0003824; 0003677; 0005634	regulation of transcription DNA-dependent; transcription; development; catalytic activity; DNA binding; nucleus	AFF3	0.3693	0.1651	-2.25736	6.15528e-07	AFF3	352.315	452.653	242.505	526.797	436.457	567.548	474.493	473.219	440.748	102.09	91.5356	216.652	42.5294	423.747
1396341	AFG3L1	Homo sapiens AFG3 ATPase family gene 3-like 1 (yeast) (AFG3L1), transcript variant 2, mRNA.	172	NM_001031805.1	NP_001026975.1	73476314	ILMN_1792109	2140025	A	2907	CTGTAGGGACAGACATGAGGTGAGTGGTTGCCAGAAGTGGAAATGGGAGT	16	+	88590305-88590354	5220301	I	168	ACCCTGCTTGCTCCAGTGGTTATGGCCAGTGAGAATGTGCGGTGTTGCAT	88571532-88571581	16q24.3b	AFG3L1			Interacting selectively with ATP, adenosine 5'-triphosphate, a universally important coenzyme and enzyme regulator [goid 5524] [evidence IEA]	FLJ45200; AFG3	FLJ45200; AFG3	AFG3L1	0006508; 0004222; 0016887; 000166; 0008237; 0005524; 0005739; 0016021	proteolysis and peptidolysis; metalloendopeptidase activity; ATPase activity; nucleotide binding; metallopeptidase activity; ATP binding; mitochondrion; integral to membrane	AFG3L1	0.41789	0.73678	1.74699	1.32828e-06	AFG3L1	776.486	794.533	432.471	535.881	459.818	445.043	309.895	287.45	505.197	190.779	1221.73	908.259	1062.51	933.112
1380081	AFMID	Homo sapiens arylformamidase (AFMID), mRNA.	125061	NM_001010982.1	NP_001010982.1	58330908	ILMN_1707551	4780370	S	1205	CTCGTCTGGCCCATCTACCTGCTGACAGAGCATGACAAAGATGACGCTCA	17	+	73714882-73714931						17q25.3b	AFMID	A membrane-bounded organelle of eukaryotic cells in which chromosomes are housed and replicated. In most cells, the nucleus contains all of the cell's chromosomes except the organellar chromosomes, and is the site of RNA synthesis and processing. In some species, or in specialized cell types, RNA metabolism or DNA replication may be absent [goid 5634] [evidence IEA]; All of the contents of a cell…	The chemical reactions and pathways resulting in the breakdown of tryptophan, the chiral amino acid 2-amino-3-(1H-indol-3-yl)propanoic acid [goid 6569] [evidence IEA]; The chemical reactions and pathways involving nicotinamide adenine dinucleotide (NAD), a coenzyme present in most living cells and derived from the B vitamin nicotinic acid [goid 19674] [pmid 14704851] [evidence EXP]	Catalysis of the reaction: N-formyl-L-kynurenine + H2O = formate + L-kynurenine [goid 4061] [evidence IEA]; Catalysis of the hydrolysis of various bonds, e.g. C-O, C-N, C-C, phosphoric anhydride bonds, etc. Hydrolase is the systematic name for any enzyme of EC class 3 [goid 16787] [evidence IEA]	KF; DKFZp686F03259	KF; MGC167063; DKFZp686F03259	AFMID	3824	catalytic activity	AFMID	0.73451	1.23124	1.66098	0.00176	AFMID	1184.66	1322.75	725.729	1344.14	320.658	545.614	842.096	868.571	894.277	368.914	1920.3	1557.28	1747.73	1652.78
1395016	AGTR1	Homo sapiens angiotensin II receptor, type 1 (AGTR1), transcript variant 5, mRNA.	185	NM_032049.1	NP_114438.1	14043065	ILMN_1814327	1500736	A	1667	CAACAGGAGATGAGAGTTCCAGATTGTTCTGTCCAGTTTCCAAAGGGCAG	3	+	149942964-149943013						3q24f	AGTR1	The membrane surrounding a cell that separates the cell from its external environment. It consists of a phospholipid bilayer and associated proteins [goid 5886] [evidence IEA]; Penetrating at least one phospholipid bilayer of a membrane. May also refer to the state of being buried in the bilayer with no exposure outside the bilayer. When used to describe a protein, indicates that all or part of t…	The cascade of processes by which a signal interacts with a receptor, causing a change in the level or activity of a second messenger or other downstream target, and ultimately effecting a change in the functioning of the cell [goid 7165] [evidence IEA]; The series of molecular signals generated as a consequence of a G-protein coupled receptor binding to its physiological ligand [goid 7186] [evid…	Combining with an extracellular or intracellular messenger to initiate a change in cell activity [goid 4872] [evidence IEA]; [goid 4945] [evidence IEA]; Combining with bradykinin to initiate a change in cell activity [goid 4947] [evidence IEA]; Combining with a C-X-C chemokine to initiate a change in cell activity. A C-X-C chemokine has a single amino acid between the first two cysteines of the c…	AT2R1A; AT2R1B; AT2R1; AT1; AT1B; AGTR1B; AGTR1A; AG2S; HAT1R	AT2R1A; AT2R1B; AT2R1; AT1; AT1B; AGTR1B; AGTR1A; AG2S; HAT1R	AGTR1	0007165; 0007200; 0007204; 0008015; 0007589; 0004872; 0016494; 0004947; 0001584; 0004945; 0005887; 0005886	signal transduction; G-protein signaling coupled to IP3 second messenger (phospholipase C activating); elevation of cytosolic calcium ion concentration; circulation; fluid secretion; receptor activity; C-X-C chemokine receptor activity; bradykinin receptor activity; rhodopsin-like receptor activity; angiotensin type II receptor activity; integral to plasma membrane; plasma membrane	AGTR1	1.06797	0.25999	-4.14559	0.0005	AGTR1	2103.93	1132.32	150.876	1533.93	3142.07	1547.98	526.366	509.288	1330.85	979.83	113.576	98.795	101.127	69.9157
1386984	AHSA2	Homo sapiens AHA1, activator of heat shock 90kDa protein ATPase homolog 2 (yeast) (AHSA2), mRNA.	130872	NM_152392.1	NP_689605.1	22748838	ILMN_1798308	4880347	S	1818	GGGAACTGGCCAGAAGAACACTATGCCATGGTTGCACTGAATTTTGTGCC	2	+	61267124-61267136:61267256-61267292						2p15d	AHSA2	All of the contents of a cell excluding the plasma membrane and nucleus, but including other subcellular structures [goid 5737] [evidence IEA]; All of the contents of a cell excluding the plasma membrane and nucleus, but including other subcellular structures [goid 5737] [evidence IEA]	A change in state or activity of a cell or an organism (in terms of movement, secretion, enzyme production, gene expression, etc.) as a result of a disturbance in organismal or cellular homeostasis, usually, but not necessarily, exogenous (e.g. temperature, humidity, ionizing radiation) [goid 6950] [evidence IEA]; A change in state or activity of a cell or an organism (in terms of movement, secre…	Functions to increase the rate of ATP hydrolysis [goid 1671] [evidence IEA]; Increases the activity of a molecular chaperone [goid 30189] [evidence IEA]; Interacting selectively with a chaperone protein, a class of proteins that bind to nascent or unfolded polypeptides and ensure correct folding or transport [goid 51087] [evidence IEA]; Functions to increase the rate of ATP hydrolysis [goid 1671]…	DKFZp564C236; Hch1	DKFZp564C236; Hch1	AHSA2	0006355; 0006350; 0046872; 0008270; 0003677; 0005634	regulation of transcription DNA-dependent; transcription; metal ion binding; zinc ion binding; DNA binding; nucleus	AHSA2	1.59936	3.78807	2.34689	9.41382e-06	AHSA2	3052.04	3868.12	1613.52	1840.48	870.874	1406.17	1449.43	1401.73	1937.8	1002.08	5880.09	3736.37	4292.37	4204.91
1396515	AKAP12	Homo sapiens A kinase (PRKA) anchor protein (gravin) 12 (AKAP12), transcript variant 2, mRNA.	9590	NM_144497.1	NP_653080.1	21493023	ILMN_1686846	4230102	I	119	GGGGAGGGCAGGGACCCGCTAAGCTGATCTCCTGTACAGTAGTGCTACTT	6	+	151688634-151688683						6q25.1c	AKAP12	A membrane-bounded organelle of eukaryotic cells in which chromosomes are housed and replicated. In most cells, the nucleus contains all of the cell's chromosomes except the organellar chromosomes, and is the site of RNA synthesis and processing. In some species, or in specialized cell types, RNA metabolism or DNA replication may be absent [goid 5634] [pmid 18029348] [evidence IDA]; All of the co…	The process of targeting specific proteins to particular membrane-bounded subcellular organelles. Usually requires an organelle specific protein sequence motif [goid 6605] [evidence IEA]; The cascade of processes by which a signal interacts with a receptor, causing a change in the level or activity of a second messenger or other downstream target, and ultimately effecting a change in the function…	Interacting selectively with any subunit of protein kinase A [goid 51018] [pmid 10858453] [evidence TAS]	DKFZp686M0430; AKAP250; DKFZp686O0331	DKFZp686M0430; AKAP250; DKFZp686O0331	AKAP12	0007165; 0006605; 0007186; 0051018; 0005515; 0005737	signal transduction; protein targeting; G-protein coupled receptor protein signaling pathway; protein kinase A binding; protein binding; cytoplasm	AKAP12	0.10922	0.06857	-1.60756	0.00295	AKAP12	195.353	86.5187	105.887	61.6358	169.453	150.949	132.689	154.982	132.183	44.7298	29.5889	128.694	133.768	77.5508
1377089	AKAP14	Homo sapiens A kinase (PRKA) anchor protein 14 (AKAP14), transcript variant 3, mRNA.	158798	NM_001008535.1	NP_001008535.1	56682939	ILMN_1802537	7000189	A	164	GCCAGAAAGCAATGGATGAGGATAACAAAGCCGCAAGCCAAACAATGCCG	X	+	118921240-118921289	6660519	I	407	AGGCCGACCACTCCAGCATGGTACACCGGTGTGAAGAACAATAAAGAGAC	118921585-118921586:118921587-118921634	Xq24c	AKAP14	All of the contents of a cell excluding the plasma membrane and nucleus, but including other subcellular structures [goid 5737] [evidence IEA]			AKAP28	AKAP28	AKAP14	3840	gamma-glutamyltransferase activity	AKAP14	0.06948	0.03917	-1.79016	0.00555	AKAP14	64.9236	50.2392	62.7496	99.5343	161.66	99.8984	64.37	53.2713	82.0808	37.3795	26.3738	47.9005	23.4628	36.7484
1384244	AKAP6	Homo sapiens A kinase (PRKA) anchor protein 6 (AKAP6), mRNA.	9472	NM_004274.3	NP_004265.3	21493044	ILMN_1770758	2630273	S	10002	AAATCTGCCTAGTACCCCGCTACCCTGTTCTGTCTTATGGAGCAGCCCAG	14	+	32371678-32371727						14q13.1a	AKAP6	A membrane-bounded organelle of eukaryotic cells in which chromosomes are housed and replicated. In most cells, the nucleus contains all of the cell's chromosomes except the organellar chromosomes, and is the site of RNA synthesis and processing. In some species, or in specialized cell types, RNA metabolism or DNA replication may be absent [goid 5634] [evidence IEA]; Double layer of lipid molecul…	The process of targeting specific proteins to particular membrane-bounded subcellular organelles. Usually requires an organelle specific protein sequence motif [goid 6605] [pmid 10413680] [evidence NAS]; The process of targeting specific proteins to particular membrane-bounded subcellular organelles. Usually requires an organelle specific protein sequence motif [goid 6605] [pmid 7721854] [evidenc…	Interacting selectively with any subunit of protein kinase A [goid 51018] [pmid 10413680] [evidence NAS]	PRKA6; ADAP6; AKAP100; mAKAP; KIAA0311; ADAP100; MGC165020	PRKA6; ADAP6; AKAP100; mAKAP; KIAA0311; ADAP100; MGC165020	AKAP6	0006605; 0051018; 0005635; 0016529	protein targeting; protein kinase A binding; nuclear membrane; sarcoplasmic reticulum	AKAP6	0.75623	0.47093	-1.62061	4e-05	AKAP6	927.452	904.361	590.298	1128.36	1394.03	925.364	749.593	779.327	924.848	246.632	593.311	461.124	403.923	842.399
1391540	AKAP9	Homo sapiens A kinase (PRKA) anchor protein (yotiao) 9 (AKAP9), transcript variant 4, mRNA.	10142	NM_147166.1	NP_671695.1	22538388	ILMN_1779315	6760079	A	4377	AGCTGTTAGTGAGTCCACGGTTCCGCCAAGCTTACCTGTTGATTCGGTGG	7	+	91490230-91490259:91497145-91497164						7q21.2a	AKAP9	A network of small fibers that surrounds the centrioles in cells; contains the microtubule nucleating activity of the centrosome [goid 242] [evidence IEA]; All of the contents of a cell excluding the plasma membrane and nucleus, but including other subcellular structures [goid 5737] [evidence IEA]; A compound membranous cytoplasmic organelle of eukaryotic cells, consisting of flattened, ribosome-…	The directed movement of substances (such as macromolecules, small molecules, ions) into, out of, within or between cells, or within a multicellular organism [goid 6810] [pmid 10390370] [evidence TAS]; The cascade of processes by which a signal interacts with a receptor, causing a change in the level or activity of a second messenger or other downstream target, and ultimately effecting a change i…	Interacting selectively with one or more specific sites on a receptor molecule, a macromolecule that undergoes combination with a hormone, neurotransmitter, drug or intracellular messenger to initiate a change in cell function [goid 5102] [pmid 9482789] [evidence TAS]; Interacting selectively with any protein or protein complex (a complex of two or more proteins that may include other nonprotein …	YOTIAO; MU-RMS-40.16A; HYPERION; AKAP450; AKAP350; CG-NAP; PRKA9; KIAA0803	YOTIAO; MU-RMS-40.16A; HYPERION; AKAP450; AKAP350; CG-NAP; PRKA9; KIAA0803	AKAP9	0007268; 0007165; 0006810; 0005102; 0005856; 0005813	synaptic transmission; signal transduction; transport; receptor binding; cytoskeleton; centrosome	AKAP9	0.28169	0.16734	-1.69887	5e-05	AKAP9	406.545	455.106	323.52	342.313	329.036	409.422	224.679	232.943	340.445	82.5079	240.886	221.766	227.24	254.953
1379467	AKT2	Homo sapiens v-akt murine thymoma viral oncogene homolog 2 (AKT2), mRNA.	208	NM_001626.2	NP_001617.1	6715585	ILMN_1743347	2230709	S	1409	GGTCATGGAGCACAGGTTCTTCCTCAGCATCAACTGGCAGGACGTGGTCC	19	-	45432892-45432894:45433010-45433056						19q13.2b	AKT2	That part of the cytoplasm that does not contain membranous or particulate subcellular components [goid 5829] [pmid 15314020] [evidence EXP]	The process of introducing a phosphate group on to a protein [goid 6468] [evidence IEA]; The covalent alteration of one or more amino acids occurring in proteins, peptides and nascent polypeptides (co-translational, post-translational modifications). Includes the modification of charged tRNAs that are destined to occur in a protein (pre-translation modification) [goid 6464] [pmid 1409633] [eviden…	Interacting selectively with a nucleotide, any compound consisting of a nucleoside that is esterified with (ortho)phosphate or an oligophosphate at any hydroxyl group on the ribose or deoxyribose moiety [goid 166] [evidence IEA]; Catalysis of the reaction: ATP + a protein serine/threonine = ADP + protein serine/threonine phosphate [goid 4674] [evidence IEA]; Interacting selectively with ATP, aden…	RAC-BETA; PKBBETA; PRKBB	RAC-BETA; PRKBB; PKBBETA	AKT2	0006468; 0004674; 0016740; 000166; 0005515; 0005524	protein amino acid phosphorylation; protein serine/threonine kinase activity; transferase activity; nucleotide binding; protein binding; ATP binding	AKT2	0.03401	0.05761	1.67877	3e-05	AKT2	52.3869	62.0549	24.8192	18.1007	32.291	36.5683	36.0555	33.8562	37.0166	14.1583	45.7652	101.88	58.8288	43.192
1386908	ALDH16A1	Homo sapiens aldehyde dehydrogenase 16 family, member A1 (ALDH16A1), mRNA.	126133	NM_153329.2	NP_699160.1	34222200	ILMN_1776384	4050411	S	2475	TGGGGGACTGATGCCTGAGCGCCACCTACTGCATTTTGGACACCTCACAC	19	+	54665526-54665536:54665537-54665575						19q13.33b	ALDH16A1		The chemical reactions and pathways, including anabolism and catabolism, by which living organisms transform chemical substances. Metabolic processes typically transform small molecules, but also include macromolecular processes such as DNA repair and replication, and protein synthesis and degradation [goid 8152] [evidence IEA]	Interacting selectively with any protein or protein complex (a complex of two or more proteins that may include other nonprotein molecules) [goid 5515] [pmid 17353931] [evidence IPI]; Catalysis of an oxidation-reduction (redox) reaction, a reversible chemical reaction in which the oxidation state of an atom or atoms within a molecule is altered. One substrate acts as a hydrogen or electron donor …	MGC10204	MGC10204	ALDH16A1	0008152; 0016491	metabolism; oxidoreductase activity	ALDH16A1	0.39459	0.63484	1.5942	5.27811e-06	ALDH16A1	637.58	585.517	608.782	406.826	401.258	532.831	317.751	314.33	475.609	131.21	698.808	1211.52	824.041	580.679
1386351	ALDH1A1	Homo sapiens aldehyde dehydrogenase 1 family, member A1 (ALDH1A1), mRNA.	216	NM_000689.3	NP_000680.2	25777722	ILMN_1709348	50100	S	1394	GCAGGCAGGAACAGTGTGGGTGAATTGCTATGGCGTGGTAAGTGCCCAGT	9	-	74710736-74710768:74714338-74714354						9q21.13a	ALDH1A1	A membrane-bounded organelle of eukaryotic cells in which chromosomes are housed and replicated. In most cells, the nucleus contains all of the cell's chromosomes except the organellar chromosomes, and is the site of RNA synthesis and processing. In some species, or in specialized cell types, RNA metabolism or DNA replication may be absent [goid 5634] [pmid 18029348] [evidence IDA]; A small, dens…	The chemical reactions and pathways involving aldehydes, any organic compound with the formula R-CH=O, as carried out by individual cells [goid 6081] [pmid 1709013] [evidence TAS]; The process of removal or addition of one or more electrons with or without the concomitant removal or addition of a proton or protons [goid 55114] [evidence IEA]; The chemical reactions and pathways, including anaboli…	Catalysis of the reaction: retinal + NAD+ + H2O = retinoate + NADH. Acts on both 11-trans and 13-cis forms of retinal [goid 1758] [evidence IEA]; Catalysis of the reaction: an aldehyde + NAD+ + H2O = an acid + NADH + H+ [goid 4029] [pmid 224930] [evidence EXP]; Catalysis of the reaction: an aldehyde + NAD+ + H2O = an acid + NADH + H+ [goid 4029] [pmid 1709013] [evidence TAS]; Increases the rate o…	ALDH11; ALDH-E1; ALDC; RALDH1; MGC2318; ALDH1; PUMB1	ALDH11; ALDH-E1; ALDC; RALDH1; MGC2318; ALDH1; PUMB1	ALDH1A1	0008152; 0006081; 0005489; 0005497; 0016491; 0004029; 0001758; 0005829	metabolism; aldehyde metabolism; electron transporter activity; androgen binding; oxidoreductase activity; aldehyde dehydrogenase (NAD) activity; retinal dehydrogenase activity; cytosol	ALDH1A1	11.8322	4.01421	-2.97473	9.57431e-06	ALDH1A1	16106.3	11311.2	5719.64	18999.5	26739.5	15592.3	11214.2	11178.5	14607.6	6356.37	2668.42	954.799	3602.22	2448.5
1396187	AMH	Homo sapiens anti-Mullerian hormone (AMH), mRNA.	268	NM_000479.2	NP_000470.1	6138973	ILMN_1660995	2490338	S	1816	CTCATCAGCCTGTCGGAGGAACGCATCAGCGCGCACCACGTGCCCAACAT	19	+	2202879-2202928						19p13.3g	AMH	The space external to the outermost structure of a cell. For cells without external protective or external encapsulating structures this refers to space outside of the plasma membrane. This term covers the host cell environment outside an intracellular parasite [goid 5576] [pmid 14750901] [evidence NAS]; That part of a multicellular organism outside the cells proper, usually taken to be outside t…	The process by which the Mullerian ducts, primordia of the oviducts, uterus and upper vagina, undergo regression in male embryos [goid 1880] [pmid 14750901] [evidence NAS]; Any process that mediates the transfer of information from one cell to another [goid 7267] [pmid 3754790] [evidence TAS]; The process whose specific outcome is the progression of the gonadal mesoderm over time, from its format…	The action characteristic of a hormone, any substance formed in very small amounts in one specialized organ or group of cells and carried (sometimes in the bloodstream) to another organ or group of cells in the same organism, upon which it has a specific regulatory action. The term was originally applied to agents with a stimulatory physiological action in vertebrate animals (as opposed to a chal…	MIF; MIS	MIF; MIS	AMH	0001880; 0007267; 0007548; 0007506; 0007530; 0005179; 0008083; 0005615	Mullerian duct regression; cell-cell signaling; sex differentiation; gonadal mesoderm development; sex determination; hormone activity; growth factor activity; extracellular space	AMH	0.05266	0.08315	1.56451	0.00406	AMH	116.251	105.245	41.9093	30.4733	57.6092	48.9796	57.187	44.725	62.7974	30.975	73.0031	143.034	119.315	131.265
1386518	AMIGO1	Homo sapiens adhesion molecule with Ig-like domain 1 (AMIGO1), mRNA.	57463	NM_020703.1	NP_065754.1	57977278	ILMN_1765460	4560050	S	2100	GTCTGAGTTGGATGGGAATGAGGAAGGAGTGAGGGGAAGAACAGATTCCC	1	-	109851258-109851307						1p13.3b	AMIGO1	Double layer of lipid molecules that encloses all cells, and, in eukaryotes, many organelles; may be a single or double lipid bilayer; also includes associated proteins [goid 16020] [evidence IEA]; Penetrating at least one phospholipid bilayer of a membrane. May also refer to the state of being buried in the bilayer with no exposure outside the bilayer. When used to describe a protein, indicates …	The attachment of a cell, either to another cell or to an underlying substrate such as the extracellular matrix, via cell adhesion molecules [goid 7155] [evidence IEA]; The attachment of an adhesion molecule in one cell to an identical molecule in an adjacent cell [goid 7156] [pmid 12629050] [evidence ISS]; The attachment of an adhesion molecule in one cell to a nonidentical adhesion molecule in …	Interacting selectively with any protein or protein complex (a complex of two or more proteins that may include other nonprotein molecules) [goid 5515] [evidence ISS]	AMIGO	AMIGO	AMIGO1	0007157; 0007413; 0007155; 0007399; 0042552; 0030154; 0007156; 0050772; 0005515; 0005887	heterophilic cell adhesion; axonal fasciculation; cell adhesion; neurogenesis; myelination; cell differentiation; homophilic cell adhesion; positive regulation of axonogenesis; protein binding; integral to plasma membrane	AMIGO1	0.34354	0.21439	-1.61718	0.00063	AMIGO1	254.504	290.346	441.673	358.48	354.855	635.052	469.532	463.896	408.542	120.875	152.087	273.82	143.872	433.408
1391268	AMMECR1	Homo sapiens Alport syndrome, mental retardation, midface hypoplasia and elliptocytosis chromosomal region, gene 1 (AMMECR1), transcript variant 1, mRNA.	9949	NM_015365.2	NP_056180.1	70995167	ILMN_1724879	5420706	I	602	GATGCATAGGTACTTTTTCTGCCATGAATTTGCATTCAGGACTCAGGGAG	X	-	109394386-109394435						Xq22.3d	AMMECR1	The part of a cell or its extracellular environment in which a gene product is located. A gene product may be located in one or more parts of a cell and its location may be as specific as a particular macromolecular complex, that is, a stable, persistent association of macromolecules that function together [goid 5575] [evidence ND ]	Any process specifically pertinent to the functioning of integrated living units: cells, tissues, organs, and organisms. A process is a collection of molecular events with a defined beginning and end [goid 8150] [evidence ND ]	Elemental activities, such as catalysis or binding, describing the actions of a gene product at the molecular level. A given gene product may exhibit one or more molecular functions [goid 3674] [evidence ND ]	AMMERC1	AMMERC1	AMMECR1	0004; 0005554; 0008372	biological process unknown; molecular function unknown; cellular component unknown	AMMECR1	0.18069	0.09655	-1.88859	3e-05	AMMECR1	128.01	122.689	204.227	153.614	319.821	278.431	253.463	248.863	213.64	73.2854	127.624	142.435	71.144	158.781
1381120	ANK1	Homo sapiens ankyrin 1, erythrocytic (ANK1), transcript variant 7, mRNA.	286	NM_020480.2	NP_065213.2	70780360	ILMN_1684694	540139	A	3117	TGCTAGTAGGAGCCGTTAGGGGAGGAGTTTGGGGTCTCCACACGATGCCT	8	-	41630109-41630158						8p11.21b	ANK1	All of the contents of a cell excluding the plasma membrane and nucleus, but including other subcellular structures [goid 5737] [evidence IEA]; Any of the various filamentous elements that form the internal framework of cells, and typically remain after treatment of the cells with mild detergent to remove membrane constituents and soluble components of the cytoplasm. The term embraces intermediat…	A process of secretion by a cell that results in the release of intracellular molecules (e.g. hormones, matrix proteins) contained within a membrane-bounded vesicle by fusion of the vesicle with the plasma membrane of a cell. This is the process whereby most molecules are secreted from eukaryotic cells [goid 6887] [pmid 1833445] [evidence NAS]; A process that is carried out at the cellular level …	The action of a molecule that contributes to the structural integrity of a cytoskeletal structure [goid 5200] [pmid 8640229] [evidence TAS]; The binding activity of a molecule that brings together a cytoskeletal molecule and one or more other molecules, permitting them to function in a coordinated way [goid 8093] [pmid 11427698] [evidence TAS]; Interacting selectively with any enzyme [goid 19899]…	SPH2; ANK; SPH1	SPH2; ANK; SPH1	ANK1	0007165; 0007010; 0006887; 0045199; 0005198; 0005515; 0030507; 0003824; 0005200; 0019899; 0008093; 0015629; 0005856; 0016323; 0005886	signal transduction; cytoskeleton organization and biogenesis; exocytosis; maintenance of epithelial cell polarity; structural molecule activity; protein binding; spectrin binding; catalytic activity; structural constituent of cytoskeleton; enzyme binding; cytoskeletal adaptor activity; actin cytoskeleton; cytoskeleton; basolateral plasma membrane; plasma membrane	ANK1	1.4135	0.63931	-2.23133	0.00054	ANK1	2405.98	1404.43	647.627	2089.81	2782.61	2541.84	1023.28	1111.64	1750.9	802.615	416.727	191.558	108.466	1292.96
1378466	ANK2	Homo sapiens ankyrin 2, neuronal (ANK2), transcript variant 2, mRNA.	287	NM_020977.2	NP_066187.2	52426736	ILMN_1776363	5390132	A	7522	GCCAAAATAAGAGAGGCCGATGGTGAAACTTTTTGAGACACCCTATGGCC	4	+	114523964-114524013						4q26a	ANK2	All of the contents of a cell excluding the plasma membrane and nucleus, but including other subcellular structures [goid 5737] [evidence IEA]; Any of the various filamentous elements that form the internal framework of cells, and typically remain after treatment of the cells with mild detergent to remove membrane constituents and soluble components of the cytoplasm. The term embraces intermediat…	The cascade of processes by which a signal interacts with a receptor, causing a change in the level or activity of a second messenger or other downstream target, and ultimately effecting a change in the functioning of the cell [goid 7165] [evidence IEA]; The cascade of processes by which a signal interacts with a receptor, causing a change in the level or activity of a second messenger or other d…	Interacting selectively with any protein or protein complex (a complex of two or more proteins that may include other nonprotein molecules) [goid 5515] [evidence IEA]; Interacting selectively with any protein or protein complex (a complex of two or more proteins that may include other nonprotein molecules) [goid 5515] [pmid 12527750] [evidence IPI]	DKFZp686P0948; FLJ38277; DKFZp686M09125; LQT4	DKFZp686P0948; FLJ38277; DKFZp686M09125; LQT4	ANK2	0007165; 0008152; 0016491; 0005515; 0005200; 0015629; 0016020	signal transduction; metabolism; oxidoreductase activity; protein binding; structural constituent of cytoskeleton; actin cytoskeleton; membrane	ANK2	3.52041	2.24467	-1.58278	3.57785e-07	ANK2	3947.8	3008.74	3630.76	5872.61	6511.69	4555.05	4323.97	4540.98	4548.95	1148.41	2763.89	1649.39	2379.17	3168.26
1379692	ANKDD1A	Homo sapiens ankyrin repeat and death domain containing 1A (ANKDD1A), mRNA.	348094	NM_182703.2	NP_874362.2	38176293	ILMN_1813139	3290296	S	2505	TCGGGGAAACTGTGTGTGCTGAAGAGTACGTGGGAGCTCTCTGTGCTATC	15	+	63037789-63037838						15q22.31b	ANKDD1A		The cascade of processes by which a signal interacts with a receptor, causing a change in the level or activity of a second messenger or other downstream target, and ultimately effecting a change in the functioning of the cell [goid 7165] [evidence IEA]; The cascade of processes by which a signal interacts with a receptor, causing a change in the level or activity of a second messenger or other d…	Interacting selectively with any protein or protein complex (a complex of two or more proteins that may include other nonprotein molecules) [goid 5515] [evidence IEA]; Interacting selectively with any protein or protein complex (a complex of two or more proteins that may include other nonprotein molecules) [goid 5515] [evidence IEA]	MGC120306; FLJ25870; MGC120307	MGC120306; FLJ25870; MGC120307; MGC120305	ANKDD1A	0006139; 0006955; 0016740; 0003723; 0016779; 0005524; 0016020; 0005792	nucleobase nucleoside nucleotide and nucleic acid metabolism; immune response; transferase activity; RNA binding; nucleotidyltransferase activity; ATP binding; membrane; microsome	ANKDD1A	2.64721	1.67525	-1.59473	4.16865e-06	ANKDD1A	2809.57	3302.16	4042.83	2251.01	4253.37	4517.09	2754.05	2824.04	3344.26	827.376	1820.19	1943.16	1601.77	2643.58
1391588	ANKRD10	Homo sapiens ankyrin repeat domain 10 (ANKRD10), mRNA.	55608	NM_017664.2	NP_060134.2	70995240	ILMN_1711828	620273	S	1920	CTTTGCAGATCACCATGTGGTTGAAGGTTTTAGTTGTGGACACAGTGGTC	13	-	110329413-110329462						13q34a-q34b	ANKRD10				DKFZp686B07190; FLJ20093	DKFZp686B07190; FLJ20093	ANKRD10	7242	intracellular signaling cascade	ANKRD10	0.71538	1.11506	1.54448	0.00666	ANKRD10	1374.06	1532.16	1162.77	565.878	822.712	604.813	417.094	466.512	868.25	432.798	1526.33	1210.54	1448.75	1208.31
1380252	ANKRD20A3	Homo sapiens ankyrin repeat domain 20 family, member A3 (ANKRD20A3), mRNA.	441425	NM_001012419.1	NP_001012419.1	60460919	ILMN_1670452	380181	S	413	AGAACGCCTTTGATACAGGCTGTCCATTGCCAGGAAGAGGCTTGTGCCGT	9	-	43119604-43119636:43119799-43119815						9p11.2d	ANKRD20A3					ANKRD20A; DKFZp434A171	ANKRD20A3	0030521; 0008285; 0019216; 0008354; 0046839; 0007205; 0016787; 0008195; 0005624; 0005887; 0005886	androgen receptor signaling pathway; negative regulation of cell proliferation; regulation of lipid metabolism; germ cell migration; phospholipid dephosphorylation; protein kinase C activation; hydrolase activity; phosphatidate phosphatase activity; membrane fraction; integral to plasma membrane; plasma membrane	ANKRD20A3	0.2358	0.15141	-1.57163	0.00101	ANKRD20A3	362.363	401.583	219.357	290.93	310.584	250.793	193.809	245.921	284.418	71.2999	248.938	86.6332	135.964	342.41
1393643	ANKRD43	Homo sapiens ankyrin repeat domain 43 (ANKRD43), mRNA.	134548	NM_175873.3	NP_787069.2	44921609	ILMN_1779882	50402	S	2489	GTGGTTGTCTCCATCATGAAATAGAAACGTGTTTGGCACTTGTGGGTGGC	5	+	132179666-132179715						5q31.1c	ANKRD43						ANKRD43	0006810; 0007253; 0006397; 0006406; 0006606; 0007265; 000166; 0008565; 0030159; 0003723; 0005737; 0005634	transport; cytoplasmic sequestering of NF-kappaB; mRNA processing; mRNA-nucleus export; protein-nucleus import; Ras protein signal transduction; nucleotide binding; protein transporter activity; receptor signaling complex scaffold activity; RNA binding; cytoplasm; nucleus	ANKRD43	1.07564	2.39809	2.20912	0.00413	ANKRD43	2753.17	3052.53	954.675	837.916	800.18	752.191	634.825	571.115	1294.58	1002.8	2528.11	3960.31	2297.07	2362.1
1395645	ANKRD47	Homo sapiens ankyrin repeat domain 47 (ANKRD47), mRNA.	256949	NM_198471.1	NP_940873.1	38348259	ILMN_1750644	4780239	S	2645	AAGGCAATTTCAGTTGGGGTGACTGTGGCAGGAAGGGGCTCACTCTGGCC	19	-	8293560-8293609						19p13.2d	ANKRD47				FLJ46061	FLJ46061	ANKRD47	0006468; 0004674; 0016740; 000166; 0005524; 0005737; 0005634	protein amino acid phosphorylation; protein serine/threonine kinase activity; transferase activity; nucleotide binding; ATP binding; cytoplasm; nucleus	ANKRD47	0.12838	0.23628	1.82365	8.02787e-06	ANKRD47	206.073	216.246	96.324	122.233	151.512	164.64	163.63	139.434	157.511	40.0848	267.781	558.395	273.902	257.538
1392699	ANKRD50	Homo sapiens ankyrin repeat domain 50 (ANKRD50), mRNA.	57182	NM_020337.1	NP_065070.1	62988327	ILMN_1729342	3400270	S	6889	GGATGGGTGCTGGAGATGCCCTGCCTTGCTTATTTGTTTCTGTGGGGGAT	4	-	125805740-125805789						4q28.1b	ANKRD50				KIAA1223	KIAA1223	ANKRD50	0007156; 0007155; 0007399; 0005509; 0005515; 0016020; 0005887	homophilic cell adhesion; cell adhesion; neurogenesis; calcium ion binding; protein binding; membrane; integral to plasma membrane	ANKRD50	0.66184	0.37856	-1.76444	0.00019	ANKRD50	1057.42	824.595	447.59	922.704	1397.19	880.441	465.626	462.842	807.302	336.852	575.066	299.896	228.093	469.142
1385459	ANKS1A	Homo sapiens ankyrin repeat and sterile alpha motif domain containing 1A (ANKS1A), mRNA.	23294	NM_015245.1	NP_056060.1	38683796	ILMN_1813669	60598	S	5999	GCCCAGGCCAGCAGAAAGCAGCTCAGAAGTATTGTTGCTCATGGTGTGGC	6	+	35166819-35166868						6p21.31d	ANKS1A	All of the contents of a cell excluding the plasma membrane and nucleus, but including other subcellular structures [goid 5737] [evidence IEA]		Interacting selectively with any protein or protein complex (a complex of two or more proteins that may include other nonprotein molecules) [goid 5515] [pmid 17353931] [evidence IPI]	ANKS1; KIAA0229	ANKS1; KIAA0229; MGC42354	ANKS1A	0006706; 0008544; 0008152; 0007565; 0006629; 0016787; 0005509; 0004773; 0005794; 0005624; 0005792; 0016021; 0005764; 0005768; 0005783; 0005886	steroid catabolism; epidermis development; metabolism; pregnancy; lipid metabolism; hydrolase activity; calcium ion binding; steryl-sulfatase activity; Golgi apparatus; membrane fraction; microsome; integral to membrane; lysosome; endosome; endoplasmic reticulum; plasma membrane	ANKS1A	1.77483	2.81051	1.56909	9.84286e-07	ANKS1A	2771.5	3019.91	1870.43	2071.66	1810.79	2167.11	1887.81	1851.53	2181.34	461.77	2689.76	3946.54	4912.12	3507.32
1394978	ANKZF1	Homo sapiens ankyrin repeat and zinc finger domain containing 1 (ANKZF1), mRNA.	55139	NM_018089.1	NP_060559.1	8922412	ILMN_1677487	5560131	S	2172	TGCTGGAGTTGTGGGGCATCCCTCCAAGGCCTGACTCCCTTTCACTACCT	2	+	219809291-219809340						2q35f	ANKZF1	The living contents of a cell; the matter contained within (but not including) the plasma membrane, usually taken to exclude large vacuoles and masses of secretory or ingested material. In eukaryotes it includes the nucleus and cytoplasm [goid 5622] [evidence IEA]		Interacting selectively with zinc (Zn) ions [goid 8270] [evidence IEA]; Interacting selectively with any metal ion [goid 46872] [evidence IEA]	ZNF744; FLJ10415	ZNF744; FLJ13144; FLJ10415	ANKZF1	0003676; 0008270; 0005634	nucleic acid binding; zinc ion binding; nucleus	ANKZF1	0.33475	0.62888	1.86152	9.44963e-06	ANKZF1	480.33	574.802	354.942	291.489	244.407	373.165	412.734	485.793	402.208	109.039	685.776	1128.44	1444.14	889.941
1388827	ANLN	Homo sapiens anillin, actin binding protein (ANLN), mRNA.	54443	NM_018685.2	NP_061155.2	31657093	ILMN_1739645	4850731	S	4131	TCAGAAAAGTGATGTGGACATAGGAGGCAATGTGTGAGACTTGGGGGTTC	7	+	36459286-36459335						7p14.2a	ANLN	A membrane-bounded organelle of eukaryotic cells in which chromosomes are housed and replicated. In most cells, the nucleus contains all of the cell's chromosomes except the organellar chromosomes, and is the site of RNA synthesis and processing. In some species, or in specialized cell types, RNA metabolism or DNA replication may be absent [goid 5634] [evidence IEA]; All of the contents of a cell…	A cellular process resulting in the division of the cytoplasm of a cell and its separation into two daughter cells. Cytokinesis usually occurs after growth, replication, and segregation of cellular components [goid 910] [pmid 10931866] [evidence IDA]; The aggregation, arrangement and bonding together of septins and associated proteins to form an organized structure resembling a ring at the cell c…	Interacting selectively with monomeric or multimeric forms of actin, including actin filaments [goid 3779] [pmid 10931866] [evidence IDA]	DKFZp779A055; Scraps; scra; ANILLIN	DKFZp779A055; Scraps; scra; ANILLIN	ANLN	000910; 0007096; 000921; 0003779; 0005826; 0015629	cytokinesis; regulation of exit from mitosis; septin ring assembly; actin binding; contractile ring; actin cytoskeleton	ANLN	5.5008	8.88536	1.60055	0.0009	ANLN	8190.39	9973.16	8249.39	7908.41	2313.1	5739.88	6682.46	6429.06	6935.73	2286.34	11984.3	14070.8	14512.1	9461.22
1389330	ANPEP	Homo sapiens alanyl (membrane) aminopeptidase (aminopeptidase N, aminopeptidase M, microsomal aminopeptidase, CD13, p150) (ANPEP), mRNA.	290	NM_001150.1	NP_001141.1	4502094	ILMN_1763837	1770605	S	3149	CTCCAGCCCACGTTCTCTCTGCCTGTGAGCCAGTCTAGTTCCTGATGACC	15	-	88129409-88129458						15q26.1b	ANPEP	All of the contents of a cell excluding the plasma membrane and nucleus, but including other subcellular structures [goid 5737] [evidence IEA]; A complex system of membrane-bounded compartments located between endoplasmic reticulum (ER) and the Golgi complex, with a distinctive membrane protein composition; involved in ER-to-Golgi transport [goid 5793] [pmid 15308636] [evidence IDA]; The membrane…	Blood vessel formation when new vessels emerge from the proliferation of pre-existing blood vessels [goid 1525] [evidence IEA]; The hydrolysis of a peptide bond or bonds within a protein [goid 6508] [evidence IEA]; The biological process whose specific outcome is the progression of a multicellular organism over time from an initial condition (e.g. a zygote or a young adult) to a later condition (…	Catalysis of the hydrolysis of N-terminal amino acid residues from in a polypeptide chain [goid 4177] [pmid 10734069] [evidence TAS]; Combining with an extracellular or intracellular messenger to initiate a change in cell activity [goid 4872] [pmid 1350662] [evidence TAS]; Catalysis of the hydrolysis of a peptide bond. A peptide bond is a covalent bond formed when the carbon atom from the carboxy…	APN; gp150; LAP1; CD13; PEPN	APN; gp150; LAP1; CD13; PEPN	ANPEP	0001525; 0006508; 0030154; 0046872; 0004179; 0008237; 0004872; 0008270; 0004177; 0005887; 0005793	angiogenesis; proteolysis and peptidolysis; cell differentiation; metal ion binding; membrane alanyl aminopeptidase activity; metallopeptidase activity; receptor activity; zinc ion binding; aminopeptidase activity; integral to plasma membrane; ER-Golgi intermediate compartment	ANPEP	0.04296	0.07519	1.7345	0.00991	ANPEP	116.556	92.8314	29.0235	38.563	16.2475	42.4996	20.1324	39.6944	49.4434	35.9092	79.3474	203.142	92.4511	116.036
1385690	AOAH	Homo sapiens acyloxyacyl hydrolase (neutrophil) (AOAH), mRNA.	313	NM_001637.1	NP_001628.1	4502114	ILMN_1709820	5960333	S	2023	CCTGGGGAGCACAGGGAGGCAGAGGCTTGGGTAAACTCATTCCACAAACC	7	-	36519310-36519359						7p14.2a	AOAH		The chemical reactions and pathways involving lipids, compounds soluble in an organic solvent but not, or sparingly, in an aqueous solvent. Includes fatty acids; neutral fats, other fatty-acid esters, and soaps; long-chain (fatty) alcohols and waxes; sphingoids and other long-chain bases; glycolipids, phospholipids and sphingolipids; and carotenes, polyprenols, sterols, terpenes and other isopren…	Catalysis of the reaction: triacylglycerol + H2O = diacylglycerol + a carboxylate [goid 4465] [pmid 1883828] [evidence TAS]; Catalysis of the hydrolysis of any ester bond [goid 16788] [evidence IEA]; Catalysis of the reaction: 3-(acyloxy)acyl group of bacterial toxin = 3-hydroxyacyl group of bacterial toxin + a fatty acid [goid 50528] [evidence IEA]			AOAH	0006954; 0006629; 0016788; 0004465; 0050528	inflammatory response; lipid metabolism; hydrolase activity acting on ester bonds; lipoprotein lipase activity; acyloxyacyl hydrolase activity	AOAH	0.12708	0.19479	1.51883	0.00253	AOAH	146.006	187.145	230.522	159.103	102.641	103.322	130.843	179.181	154.845	43.7765	259.342	147.265	303.936	138.39
1384977	AP1G2	Homo sapiens adaptor-related protein complex 1, gamma 2 subunit (AP1G2), mRNA.	8906	NM_003917.2	NP_003908.1	18104994	ILMN_1754179	2690114	A	2530	CACAGTTCCAGCTCGGGGTGGCCTTCCTATCACCCAGCTCTTCAGAATCC	14	-	23099000-23099049						14q11.2g	AP1G2	The lipid bilayer surrounding any of the compartments of the Golgi apparatus [goid 139] [evidence IEA]; All of the contents of a cell excluding the plasma membrane and nucleus, but including other subcellular structures [goid 5737] [pmid 18029348] [evidence IDA]; A membrane-bounded organelle that carries materials newly ingested by endocytosis. It passes many of the materials to lysosomes for deg…	The directed movement of proteins in a cell, including the movement of proteins between specific compartments or structures within a cell, such as organelles of a eukaryotic cell [goid 6886] [evidence IEA]; The directed movement of substances, either within a vesicle or in the vesicle membrane, into, out of or within a cell [goid 16192] [pmid 9733768] [evidence NAS]; Any process by which an organ…	Interacting selectively with any protein or protein complex (a complex of two or more proteins that may include other nonprotein molecules) [goid 5515] [evidence ISS]; Enables the directed movement of proteins into, out of, within or between cells [goid 8565] [evidence IEA]	G2AD	G2AD	AP1G2	0006897; 0006886; 0006461; 0005515; 0005905; 0016020; 0030121; 0005795; 0030133; 0005798	endocytosis; intracellular protein transport; protein complex assembly; protein binding; coated pit; membrane; AP-1 adaptor complex; Golgi stack; transport vesicle; Golgi-associated vesicle	AP1G2	0.20541	0.43814	2.11353	0.00075	AP1G2	468.818	577.669	183.655	184.326	135.878	208.236	129.227	141.246	253.632	171.147	392.242	561.244	406.992	890.259
1380813	APBA3	Homo sapiens amyloid beta (A4) precursor protein-binding, family A, member 3 (APBA3), mRNA.	9546	NM_004886.3	NP_004877.1	46255053	ILMN_1686610	2070180	S	1895	TGTACCTGTGACCACCTCATCCCTTGCCTGCCACTGTGCCTTCGCCTCCA	19	-	3701984-3702023:3702024-3702033						19p13.3e	APBA3	Double layer of lipid molecules that encloses all cells, and, in eukaryotes, many organelles; may be a single or double lipid bilayer; also includes associated proteins [goid 16020] [evidence NAS]	A series of reactions within the cell that occur as a result of a single trigger reaction or compound [goid 7242] [evidence NAS]; The directed movement of proteins into, out of, within or between cells [goid 15031] [evidence IEA]	Interacting selectively with any protein or protein complex (a complex of two or more proteins that may include other nonprotein molecules) [goid 5515] [pmid 10049767] [evidence IPI]	MGC:15815; X11L2; mint3	MGC:15815; X11L2; mint3	APBA3	0007242; 0015031; 0005515; 0016020	intracellular signaling cascade; protein transport; protein binding; membrane	APBA3	0.32642	0.4991	1.51508	2e-05	APBA3	313.91	412.305	473.786	350.372	289.135	374.974	443.672	464.336	390.311	69.3673	478.9	752.594	1019.22	479.941
1377947	APOL3	Homo sapiens apolipoprotein L, 3 (APOL3), transcript variant alpha/b, mRNA.	80833	NM_030644.1	NP_085147.1	22035641	ILMN_1756862	5670274	A	2003	ATGATGGCGGTGGAGGTGGTGGTTGTAGTGTGATGGATCCCCTTTAGGTT	22	-	34866598-34866647						22q12.3d	APOL3	The space external to the outermost structure of a cell. For cells without external protective or external encapsulating structures this refers to space outside of the plasma membrane. This term covers the host cell environment outside an intracellular parasite [goid 5576] [evidence IEA]; All of the contents of a cell excluding the plasma membrane and nucleus, but including other subcellular stru…	The directed movement of lipids into, out of, within or between cells. Lipids are compounds soluble in an organic solvent but not, or sparingly, in an aqueous solvent [goid 6869] [evidence IEA]; The immediate defensive reaction (by vertebrate tissue) to infection or injury caused by chemical or physical agents. The process is characterized by local vasodilation, extravasation of plasma into inter…	Mediates the transfer of a signal from the outside to the inside of a cell by means other than the introduction of the signal molecule itself into the cell [goid 4871] [pmid 12761501] [evidence IMP]; Enables the directed movement of lipids into, out of, within or between cells [goid 5319] [pmid 10233894] [evidence TAS]; Interacting selectively with a lipid [goid 8289] [evidence IEA]; Interacting …	CG12-1; APOLIII	CG12-1; APOLIII	APOL3	0042157; 0006869; 0043123; 0006954; 0008289; 0004871; 0005319; 0005576	lipoprotein metabolism; lipid transport; positive regulation of I-kappaB kinase/NF-kappaB cascade; inflammatory response; lipid binding; signal transducer activity; lipid transporter activity; extracellular region	APOL3	0.25095	0.39037	1.54138	1.07194e-08	APOL3	237.236	400.218	362.744	281.143	223.744	277.703	304.357	325.117	301.533	60.022	533.973	509.631	459.627	419.704
1385564	AQP11	Homo sapiens aquaporin 11 (AQP11), mRNA.	282679	NM_173039.1	NP_766627.1	27370564	ILMN_1762606	7510487	S	1252	CACCGGCTGCACTGGATTCATCAGTGTTAACTTCCTTTGAGGAAGCTGCC	11	+	76998148-76998197						11q14.1a	AQP11	The external part of the cell wall and/or plasma membrane [goid 9986] [pmid 16650285] [evidence IDA]; Double layer of lipid molecules that encloses all cells, and, in eukaryotes, many organelles; may be a single or double lipid bilayer; also includes associated proteins [goid 16020] [evidence IEA]; Penetrating at least one phospholipid bilayer of a membrane. May also refer to the state of being b…	The directed movement of charged atoms or small charged molecules into, out of, within or between cells [goid 6811] [pmid 16650285] [evidence IDA]; The directed movement of water (H2O) into, out of, within or between cells [goid 6833] [pmid 16650285] [evidence IDA]; The directed movement of glycerol into, out of, within or between cells. Glycerol is 1,2,3-propanetriol, a sweet, hygroscopic, visco…	Enables the directed movement of substances (such as macromolecules, small molecules, ions) into, out of, within or between cells [goid 5215] [evidence IEA]	AQPX1	AQPX1	AQP11	0006810; 0005215; 0016020; 0016021	transport; transporter activity; membrane; integral to membrane	AQP11	0.60962	0.36592	-1.68136	0.00031	AQP11	918.057	682.304	524.947	974.115	740.001	666.919	746.77	662.657	739.471	145.139	414.35	159.821	416.62	448.114
1395161	AR	Homo sapiens androgen receptor (dihydrotestosterone receptor; testicular feminization; spinal and bulbar muscular atrophy; Kennedy disease) (AR), transcript variant 1, mRNA.	367	NM_000044.2	NP_000035.2	21322251	ILMN_1767351	5050386	A	3928	GTCTTCTGCCTGTTATAACTCTGCACTACTCCTCTGCAGTGCCTTGGGGA	X	+	66860458-66860507	5080632	I	2629	CTGGCGGCATGGTGAGCAGAGTGCCCTATCCCAGTCCCACTTGTGTCAAA	66683227-66683276	Xq12c	AR	A membrane-bounded organelle of eukaryotic cells in which chromosomes are housed and replicated. In most cells, the nucleus contains all of the cell's chromosomes except the organellar chromosomes, and is the site of RNA synthesis and processing. In some species, or in specialized cell types, RNA metabolism or DNA replication may be absent [goid 5634] [pmid 15572661] [evidence IDA]; All of the co…	The process whose specific outcome is the progression of the embryo in the uterus over time, from formation of the zygote in the oviduct, to birth [goid 1701] [evidence IEA]; Any process that modulates the frequency, rate or extent of DNA-dependent transcription [goid 6355] [evidence IEA]; The directed movement of substances (such as macromolecules, small molecules, ions) into, out of, within or …	The function of binding to a specific DNA sequence in order to modulate transcription. The transcription factor may or may not also interact selectively with a protein or macromolecular complex [goid 3700] [pmid 15572661] [evidence IDA]; Combining with an extracellular or intracellular messenger to initiate a change in cell activity [goid 4872] [evidence IEA]; Combining with an androgen to initia…	DHTR; SMAX1; TFM; HUMARA; AIS; NR3C4; KD; SBMA	DHTR; SMAX1; TFM; HUMARA; AIS; NR3C4; KD; SBMA	AR	0008283; 0007165; 0006810; 0030850; 0007548; 0016049; 0007267; 0006355; 0006350; 0005497; 0046872; 0004882; 0046983; 0005496; 0004872; 0008270; 0003700; 0043565; 0005737; 0005634	cell proliferation; signal transduction; transport; prostate gland development; sex differentiation; cell growth; cell-cell signaling; regulation of transcription DNA-dependent; transcription; androgen binding; metal ion binding; androgen receptor activity; protein dimerization activity; steroid binding; receptor activity; zinc ion binding; transcription factor activity; sequence-specific DNA bin…	AR	0.26799	0.17039	-1.58726	0.00021	AR	206.086	289.941	213.569	283.435	314.982	382.168	424.905	425.848	317.617	86.6832	154.08	140.169	164.021	230.685
1383167	ARC	Homo sapiens activity-regulated cytoskeleton-associated protein (ARC), mRNA.	23237	NM_015193.3	NP_056008.1	56676395	ILMN_1711120	5810687	S	2675	CAGACCACTCTGACAAGTCTTCAGCCCACACCCTGCCAGCCCCACAGATT	8	-	143689630-143689679						8q24.3e	ARC	A structure in the head of a spermatozoon that contains acid hydrolases, and is concerned with the breakdown of the outer membrane of the ovum during fertilization. It lies just beneath the plasma membrane and is derived from the lysosome [goid 1669] [evidence IEA]; All of the contents of a cell excluding the plasma membrane and nucleus, but including other subcellular structures [goid 5737] [evi…	A type of vesicle-mediated transport in which cells take up external materials or membrane constituents by the invagination of small region of the plasma membrane to form a new membrane-bounded vesicle [goid 6897] [evidence IEA]; The biological process whose specific outcome is the progression of a multicellular organism over time from an initial condition (e.g. a zygote or a young adult) to a la…		KIAA0278	KIAA0278	ARC	0005198; 0005882	structural molecule activity; intermediate filament	ARC	0.11469	0.0709	-1.63254	0.00274	ARC	65.0543	94.9488	217.786	149.781	171.791	84.4539	154.604	153.376	136.474	50.9643	43.5533	122.135	45.5593	113.881
1377411	ARHGAP17	Homo sapiens Rho GTPase activating protein 17 (ARHGAP17), transcript variant 2, mRNA.	55114	NM_018054.4	NP_060524.4	54860104	ILMN_1718610	1710100	A	3053	GTGACTGCTGGCTCTGTCACCTCATCAAACTGGATGTGACCCATGCCGCC	16	-	24838354-24838403						16p12.1b	ARHGAP17	The living contents of a cell; the matter contained within (but not including) the plasma membrane, usually taken to exclude large vacuoles and masses of secretory or ingested material. In eukaryotes it includes the nucleus and cytoplasm [goid 5622] [evidence IEA]; All of the contents of a cell excluding the plasma membrane and nucleus, but including other subcellular structures [goid 5737] [evid…	The cascade of processes by which a signal interacts with a receptor, causing a change in the level or activity of a second messenger or other downstream target, and ultimately effecting a change in the functioning of the cell [goid 7165] [evidence IEA]	Increases the activity of a GTPase, an enzyme that catalyzes the hydrolysis of GTP [goid 5096] [evidence IEA]; Interacting selectively with any protein or protein complex (a complex of two or more proteins that may include other nonprotein molecules) [goid 5515] [evidence IEA]; Interacting selectively with a SH3 domain (Src homology 3) of a protein, small protein modules containing approximately …	FLJ37567; MSTP110; DKFZp564A1363; MSTP066; RICH1; MST066; FLJ43368; MGC87805; MSTP038; WBP15; NADRIN; MST110	FLJ37567; MSTP110; DKFZp564A1363; MSTP066; RICH1; MST066; FLJ43368; MGC87805; MSTP038; WBP15; NADRIN; MST110	ARHGAP17	0006418; 0004812; 0005515; 0005524; 0005737	tRNA aminoacylation for protein translation; aminoacyl-tRNA ligase activity; protein binding; ATP binding; cytoplasm	ARHGAP17	1.20921	2.13415	1.74882	7.89278e-10	ARHGAP17	1557.49	2153.12	1620.55	1415.52	1185.67	1448.59	1232.45	1221.38	1479.35	315.954	2704.44	3023.11	4370.13	2561.54
1392405	ARHGAP22	Homo sapiens Rho GTPase activating protein 22 (ARHGAP22), mRNA.	58504	NM_021226.2	NP_067049.2	34013589	ILMN_1674307	6220762	S	2508	GAGAGATCCTGATACCTCTGTGGGGACTGTGGGGACTTTTGGGACCCCAC	10	-	49324276-49324325						10q11.22d	ARHGAP22	The living contents of a cell; the matter contained within (but not including) the plasma membrane, usually taken to exclude large vacuoles and masses of secretory or ingested material. In eukaryotes it includes the nucleus and cytoplasm [goid 5622] [evidence IEA]; A membrane-bounded organelle of eukaryotic cells in which chromosomes are housed and replicated. In most cells, the nucleus contains …	Blood vessel formation when new vessels emerge from the proliferation of pre-existing blood vessels [goid 1525] [evidence IEA]; The synthesis of either RNA on a template of DNA or DNA on a template of RNA [goid 6350] [evidence IEA]; Any process that modulates the frequency, rate or extent of DNA-dependent transcription [goid 6355] [evidence IEA]; The cascade of processes by which a signal interac…	Increases the activity of a GTPase, an enzyme that catalyzes the hydrolysis of GTP [goid 5096] [evidence IEA]	RhoGAP2	RhoGAP2	ARHGAP22	5096	GTPase activator activity	ARHGAP22	0.18941	0.31507	1.64827	3e-05	ARHGAP22	300.333	239.782	265.074	335.33	112.242	230.115	182.298	174.731	229.988	72.2734	603.338	482.882	268.067	289.655
1384268	ARHGAP27	Homo sapiens Rho GTPase activating protein 27 (ARHGAP27), mRNA.	201176	NM_199282.1	NP_954976.1	40548321	ILMN_1734652	3120647	S	3512	CCATTGCCAACAGGGCCAGGGCAAGAGTACACACAGGGGCCTCATACCAT	17	-	40827124-40827173						17q21.31d	ARHGAP27	The living contents of a cell; the matter contained within (but not including) the plasma membrane, usually taken to exclude large vacuoles and masses of secretory or ingested material. In eukaryotes it includes the nucleus and cytoplasm [goid 5622] [evidence ISS]; All of the contents of a cell excluding the plasma membrane and nucleus, but including other subcellular structures [goid 5737] [evid…	The uptake of external materials by cells, utilizing receptors to ensure specificity of transport. A specific receptor on the cell surface binds tightly to the extracellular macromolecule (the ligand) that it recognizes; the plasma-membrane region containing the receptor-ligand complex then undergoes endocytosis, forming a transport vesicle containing the receptor-ligand complex and excluding mos…	Increases the activity of a GTPase, an enzyme that catalyzes the hydrolysis of GTP [goid 5096] [evidence IEA]; Interacting selectively with any protein or protein complex (a complex of two or more proteins that may include other nonprotein molecules) [goid 5515] [evidence ISS]; Interacting selectively with a SH3 domain (Src homology 3) of a protein, small protein modules containing approximately …	CAMGAP1; FLJ43547; MGC120624	CAMGAP1; FLJ43547; MGC120624	ARHGAP27	0046580; 0005099	negative regulation of Ras protein signal transduction; Ras GTPase activator activity	ARHGAP27	0.56002	0.9377	1.65913	2.72991e-07	ARHGAP27	870.82	872.653	978.085	565.661	546.162	459.085	552.805	594.217	679.936	194.829	1185.27	1298.89	1052.17	1081.65
1387297	ARHGAP9	Homo sapiens Rho GTPase activating protein 9 (ARHGAP9), mRNA.	64333	NM_032496.1	NP_115885.1	14210509	ILMN_1663916	2510035	S	2760	GTCTCTATCTTCATGAGTGTGACTTGAGGTGTTGGGATGGGTGAGGGAGC	12	-	56152416-56152465						12q13.3b	ARHGAP9	The living contents of a cell; the matter contained within (but not including) the plasma membrane, usually taken to exclude large vacuoles and masses of secretory or ingested material. In eukaryotes it includes the nucleus and cytoplasm [goid 5622] [evidence IEA]	The cascade of processes by which a signal interacts with a receptor, causing a change in the level or activity of a second messenger or other downstream target, and ultimately effecting a change in the functioning of the cell [goid 7165] [evidence IEA]	Increases the activity of a GTPase, an enzyme that catalyzes the hydrolysis of GTP [goid 5096] [evidence IEA]; Interacting selectively with any protein or protein complex (a complex of two or more proteins that may include other nonprotein molecules) [goid 5515] [evidence IEA]	10C; RGL1; MGC1295	10C; RGL1; FLJ16525; MGC1295	ARHGAP9	5096	GTPase activator activity	ARHGAP9	0.41807	0.93705	2.22095	0.00336	ARHGAP9	973.48	846.463	602.69	440.066	370.962	322.973	243.644	265.57	508.231	274.247	990.443	869.042	642.522	819.226
1377519	ARHGDIB	Homo sapiens Rho GDP dissociation inhibitor (GDI) beta (ARHGDIB), mRNA.	397	NM_001175.4	NP_001166.3	56676392	ILMN_1678143	360762	S	1086	TTGTGGTTGTTGCTGGCCCAATGAGTCCCTAGTCACATCCCCTGCCAGAG	12	-	14986297-14986346						12p12.3e	ARHGDIB	All of the contents of a cell excluding the plasma membrane and nucleus, but including other subcellular structures [goid 5737] [pmid 16130169] [evidence TAS]; Any of the various filamentous elements that form the internal framework of cells, and typically remain after treatment of the cells with mild detergent to remove membrane constituents and soluble components of the cytoplasm. The term embr…	Any process involved in the controlled movement of a cell [goid 6928] [pmid 16130169] [evidence TAS]; Any immune system process that functions in the calibrated response of an organism to a potential internal or invasive threat [goid 6955] [pmid 8356058] [evidence TAS]; Any process that stops, prevents or reduces the frequency, rate or extent of cell adhesion [goid 7162] [pmid 9113980] [evidence …	Prevents the dissociation of GDP from the small GTPase Rho, thereby preventing GTP from binding [goid 5094] [pmid 8262133] [evidence TAS]; Increases the activity of a GTPase, an enzyme that catalyzes the hydrolysis of GTP [goid 5096] [evidence IEA]; Interacting selectively with any protein or protein complex (a complex of two or more proteins that may include other nonprotein molecules) [goid 551…	Ly-GDI; RAP1GN1; GDIA2; D4; LYGDI; GDID4	Ly-GDI; RAP1GN1; GDIA2; D4; LYGDI; GDID4	ARHGDIB	0006955; 0007275; 0007162; 0007266; 0030036; 0006928; 0005094; 0005096; 0005856; 0005737; 0016023	immune response; development; negative regulation of cell adhesion; Rho protein signal transduction; actin cytoskeleton organization and biogenesis; cell motility; Rho GDP-dissociation inhibitor activity; GTPase activator activity; cytoskeleton; cytoplasm; cytoplasmic membrane-bound vesicle	ARHGDIB	5.83654	9.64618	1.63765	0.00358	ARHGDIB	7753.68	7002.83	14571.3	6569.13	4316.03	4518.1	7582.2	7421.23	7466.82	3167.14	15311.4	9569.1	8777.7	8600.56
1378440	ARHGEF1	Homo sapiens Rho guanine nucleotide exchange factor (GEF) 1 (ARHGEF1), transcript variant 1, mRNA.	9138	NM_199002.1	NP_945353.1	39777605	ILMN_1772370	5860239	A	2774	CATGAAGCAGCTGGAGGAGTTGGAGGAGGAATTTTGCCGCCTGAGACCCC	19	+	47102597-47102612:47102695-47102728						19q13.2c	ARHGEF1	The living contents of a cell; the matter contained within (but not including) the plasma membrane, usually taken to exclude large vacuoles and masses of secretory or ingested material. In eukaryotes it includes the nucleus and cytoplasm [goid 5622] [evidence IEA]; All of the contents of a cell excluding the plasma membrane and nucleus, but including other subcellular structures [goid 5737] [pmid…	The multiplication or reproduction of cells, resulting in the expansion of a cell population [goid 8283] [pmid 8810315] [evidence TAS]; Any process that modulates the frequency, rate or extent of Rho protein signal transduction [goid 35023] [evidence IEA]; Any process that modulates the frequency, rate or extent of Rho protein signal transduction [goid 35023] [evidence IEA]; Any process that modu…	Stimulates the exchange of guanyl nucleotides by a GTPase. Under normal cellular physiological conditions, the concentration of GTP is higher than that of GDP, favoring the replacement of GDP by GTP in association with the GTPase [goid 5085] [evidence IEA]; Stimulates the exchange of guanyl nucleotides by a GTPase of the Rho family. Under normal cellular physiological conditions, the concentratio…	P115-RHOGEF; GEF1; LBCL2; SUB1.5	P115-RHOGEF; GEF1; LBCL2; SUB1.5	ARHGEF1	0008283; 0007266; 00074; 0005515; 0005096; 0005089; 0005085; 0005737; 0005886	cell proliferation; Rho protein signal transduction; regulation of cell cycle; protein binding; GTPase activator activity; Rho guanyl-nucleotide exchange factor activity; guanyl-nucleotide exchange factor activity; cytoplasm; plasma membrane	ARHGEF1	0.18303	0.27774	1.50364	0.0007	ARHGEF1	338.243	381.509	180.492	233.21	137.139	171.517	197.952	153.051	224.139	89.3227	398.301	379.218	202.13	345.849
1388543	ARHGEF2	Homo sapiens rho/rac guanine nucleotide exchange factor (GEF) 2 (ARHGEF2), mRNA.	9181	NM_004723.2	NP_004714.2	15011973	ILMN_1703477	7150360	S	3950	TGGGGGATTTTTCAGTGGAACCCTTGCCCCCAAATGTCGACCAGCCCCCA	1	-	154183346-154183395						1q22c	ARHGEF2	The living contents of a cell; the matter contained within (but not including) the plasma membrane, usually taken to exclude large vacuoles and masses of secretory or ingested material. In eukaryotes it includes the nucleus and cytoplasm [goid 5622] [evidence IEA]; All of the contents of a cell excluding the plasma membrane and nucleus, but including other subcellular structures [goid 5737] [evid…	The developmental process by which the size or shape of a cell is generated and organized. Morphogenesis pertains to the creation of form [goid 902] [evidence ISS]; Control of the spatial distribution of actin filaments; includes organizing filaments into meshworks, bundles, or other structures, as by cross-linking [goid 7015] [evidence ISS]; Any process that stops, prevents or reduces the freque…	Stimulates the exchange of guanyl nucleotides by a GTPase. Under normal cellular physiological conditions, the concentration of GTP is higher than that of GDP, favoring the replacement of GDP by GTP in association with the GTPase [goid 5085] [pmid 9857026] [evidence TAS]; Interacting selectively with microtubules, filaments composed of tubulin monomers [goid 8017] [evidence ISS]; Interacting sele…	P40; GEF; LFP40; DKFZp547L106; GEF-H1; DKFZp547P1516; GEFH1; KIAA0651	P40; GEF; LFP40; DKFZp547L106; GEF-H1; DKFZp547P1516; GEFH1; KIAA0651	ARHGEF2	000902; 0006886; 0007242; 0007015; 0007026; 0035023; 0042127; 0046872; 0008017; 0019992; 0005089; 0048365; 0017048; 0030676; 0008270; 0005085; 0005874	cellular morphogenesis; intracellular protein transport; intracellular signaling cascade; actin filament organization; negative regulation of microtubule depolymerization; regulation of Rho protein signal transduction; regulation of cell proliferation; metal ion binding; microtubule binding; diacylglycerol binding; Rho guanyl-nucleotide exchange factor activity; Rac GTPase binding; Rho GTPase bin…	ARHGEF2	4.85293	8.04733	1.64311	1e-05	ARHGEF2	5496.04	6380.06	8300.52	8347.8	2586.41	5935.74	6988.37	6211.42	6280.8	1822.5	10879.8	16418.7	12148.7	8979.9
1387287	ARL17P1	Homo sapiens ADP-ribosylation factor-like 17 pseudogene 1 (ARL17P1), mRNA.	51326	NM_016632.1	NP_057716.1	7706177	ILMN_1795740	1780139	S	531	GAAACCCTATGCCAGGTAACACCAAAGCTTTGGCCCAGTGCCCTCTGTTG	17	-	41949601-41949650						17q21.32a	ARL17P1				ARF1P2; ARL17A	ARF1P2; ARL17A	ARL17P1	0006888; 0015031; 000166; 0005525; 0005795	ER to Golgi transport; protein transport; nucleotide binding; GTP binding; Golgi stack	ARL17P1	0.15771	0.31038	1.95001	0.00218	ARL17P1	145.934	169.609	285.136	135.178	142.314	142.626	241.526	252.444	189.346	60.3359	399.772	316.146	519.273	453.459
1394673	ARL4	Homo sapiens ADP-ribosylation factor-like 4 (ARL4), transcript variant 1, mRNA.	10124	NM_005738.2	NP_005729.1	47078225	ILMN_1743241	4890048	A	2805	GTCCCATAGTAGTTCAGATCTGCTTAGATGTGACAGGCATTGAAGGCTGT	7	+	12696727-12696776	4540575	I	313	GCTAAGCTGGAAGGGTGCTTATCCCTGCGTAGAAACGCCTGCCAATGCTT	12693798-12693847	7p21.3a	ARL4				ARL4A	ARL4	ARL4	0007264; 000166; 0003924; 0005525; 0005634	small GTPase mediated signal transduction; nucleotide binding; GTPase activity; GTP binding; nucleus	ARL4	0.35662	0.57807	1.60616	0.00509	ARL4	453.781	818.864	346.537	383.863	338.467	330.851	394.143	363.755	428.783	162.457	505.621	1262	766.117	639.719
1386557	ARL6IP4	Homo sapiens ADP-ribosylation-like factor 6 interacting protein 4 (ARL6IP4), transcript variant 4, mRNA.	51329	NM_001002252.1	NP_001002252.1	50409690	ILMN_1779835	3190220	I	1054	CCCCCAGCTCTGTTTGTGATGTACCCCTCCTCCTGTGTGCTTTCTTCCCC	12	+	122033068-122033086:122033087-122033117						12q24.31d	ARL6IP4	A membrane-bounded organelle of eukaryotic cells in which chromosomes are housed and replicated. In most cells, the nucleus contains all of the cell's chromosomes except the organellar chromosomes, and is the site of RNA synthesis and processing. In some species, or in specialized cell types, RNA metabolism or DNA replication may be absent [goid 5634] [pmid 10708573] [evidence TAS]	The process of removing sections of the primary RNA transcript to remove sequences not present in the mature form of the RNA and joining the remaining sections to form the mature form of the RNA [goid 8380] [pmid 10708573] [evidence TAS]		MGC814; SRp25; SR-25	MGC814; SRp25; SR-25	ARL6IP4	0046872; 0008270	metal ion binding; zinc ion binding	ARL6IP4	0.08837	0.17695	1.9842	1.65704e-08	ARL6IP4	121.088	128.597	71.6258	90.1723	95.109	115.027	138.811	103.451	107.985	22.1102	220.6	213.162	282.561	224.541
1378654	ARRDC2	Homo sapiens arrestin domain containing 2 (ARRDC2), transcript variant 1, mRNA.	27106	NM_015683.1	NP_056498.1	18373304	ILMN_1655612	4570754	A	2238	GAATTCAAGACAGTGACAGCATTACGTCACCCCTGGGGACAGAGGTCAGC	19	+	17985646-17985695	6560685	I	79	TTGAGCTGCCGGTTCGCGAGTTCGAGGCCAGGTTCCGCCTGTCGTGGGTT	17980055-17980104	19p13.11c	ARRDC2				CLONE24945; PP2703	CLONE24945; PP2703	ARRDC2	0046872; 0003676; 0008270; 0005634	metal ion binding; nucleic acid binding; zinc ion binding; nucleus	ARRDC2	0.81182	1.43725	1.75426	0.00214	ARRDC2	1015.64	1147.11	939.662	920.07	274.973	1169.89	1171.39	1290.09	991.103	316.078	1591.12	4581.65	1388.27	1284.65
1389643	ARS2	Homo sapiens arsenate resistance protein 2 (ARS2), transcript variant 1, mRNA.	51593	NM_015908.4	NP_056992.4	58331217	ILMN_1800205	3130494	A	2717	GTATGGTGCTGGTCGAGGGAACTATGATGCCTTCCGAGGCCAGGGAGGTT	7	+	100323869-100323918						7q22.1c	ARS2	The part of a cell or its extracellular environment in which a gene product is located. A gene product may be located in one or more parts of a cell and its location may be as specific as a particular macromolecular complex, that is, a stable, persistent association of macromolecules that function together [goid 5575] [evidence ND ]	A change in state or activity of a cell or an organism (in terms of movement, secretion, enzyme production, gene expression, etc.) as a result of an arsenic stimulus from compounds containing arsenic, including arsenates, arsenites, and arsenides [goid 46685] [pmid 11239002] [evidence NAS]	Elemental activities, such as catalysis or binding, describing the actions of a gene product at the molecular level. A given gene product may exhibit one or more molecular functions [goid 3674] [evidence ND ]; Interacting selectively with any protein or protein complex (a complex of two or more proteins that may include other nonprotein molecules) [goid 5515] [pmid 17353931] [evidence IPI]	ASR2; MGC126427	ASR2; MGC126427	ARS2	0046685; 000166; 0008372	response to arsenic; nucleotide binding; cellular component unknown	ARS2	1.06376	1.71532	1.59779	2.60703e-07	ARS2	1682.79	1799.63	1274.84	1363.84	1017.59	1128.24	1106.06	1002.97	1297	301.399	1647.46	2553.27	2637.9	2207.36
1391390	ARSA	Homo sapiens arylsulfatase A (ARSA), mRNA.	410	NM_000487.3	NP_000478.2	7262293	ILMN_1656477	6770050	S	1467	CACAGGCAAGAGCCCTCGGCAGTCTCTCTTCTTCTACCCGTCCTACCCAG	22	-	49410935-49410975:49411230-49411238						22q13.33b	ARSA	Integral to that fraction of cells, prepared by disruptive biochemical methods, that includes the plasma and other membranes; require detergents, such as Triton X-100, to be released from membranes [goid 299] [evidence IEA]; All of the contents of a cell excluding the plasma membrane and nucleus, but including other subcellular structures [goid 5737] [pmid 18029348] [evidence IDA]; A cytoplasmic,…	The process by which the sperm binds to the zona pellucida glycoprotein layer of the egg. The process begins with the attachment of the sperm plasma membrane to the zona pellucida and includes attachment of the acrosome inner membrane to the zona pellucida after the acrosomal reaction takes place [goid 7339] [evidence IEA]; The chemical reactions and pathways, including anabolism and catabolism, …	Interacting selectively with magnesium (Mg) ions [goid 287] [evidence IEA]; Catalysis of the reaction: a phenol sulfate + H2O = a phenol + SO4(2-) (sulfate) [goid 4065] [pmid 2562955] [evidence TAS]; Catalysis of the reaction: a cerebroside 3-sulfate + H2O = a cerebroside + SO4(2-) (sulfate) [goid 4098] [evidence IEA]; Catalysis of the hydrolysis of various bonds, e.g. C-O, C-N, C-C, phosphoric a…	MLD	MLD	ARSA	0008152; 0006665; 0006629; 0004065; 000287; 0004098; 0016787; 0008484; 0005764	metabolism; sphingolipid metabolism; lipid metabolism; arylsulfatase activity; magnesium ion binding; cerebroside-sulfatase activity; hydrolase activity; sulfuric ester hydrolase activity; lysosome	ARSA	0.19811	0.31775	1.58926	1.14222e-07	ARSA	333.56	302.133	293.308	263.243	194.201	250.095	136.959	159.128	241.578	71.0465	408.646	396.523	308.071	317.664
1377688	ART3	Homo sapiens ADP-ribosyltransferase 3 (ART3), mRNA.	419	NM_001179.2	NP_001170.2	21361166	ILMN_1693218	1500414	S	1125	CTCCAGGTCCAGTTCCTGTTCCAGGTCCCAAAAGCCATCCTTCTGCATCC	4	+	77252565-77252614						4q21.1a	ART3	The membrane surrounding a cell that separates the cell from its external environment. It consists of a phospholipid bilayer and associated proteins [goid 5886] [evidence IEA]; Penetrating at least one phospholipid bilayer of a plasma membrane. May also refer to the state of being buried in the bilayer with no exposure outside the bilayer [goid 5887] [pmid 9119374] [evidence TAS]; Tethered to a m…	The transfer, from NAD, of ADP-ribose to protein amino acids [goid 6471] [evidence IEA]; The transfer, from NAD, of ADP-ribose to protein amino acids [goid 6471] [pmid 9119374] [evidence TAS]	Catalysis of the reaction: NAD(P)+ + L-arginine = nicotinamide + N2-(ADP-D-ribosyl)-L-arginine [goid 3956] [evidence IEA]; Catalysis of the reaction: NAD+ + (ADP-D-ribosyl)(n)-acceptor = nicotinamide + (ADP-D-ribosyl)(n+1)-acceptor [goid 3950] [pmid 9119374] [evidence TAS]; Catalysis of the reaction: NAD(P)+ + L-arginine = nicotinamide + N2-(ADP-D-ribosyl)-L-arginine [goid 3956] [evidence IEA]; C…			ART3	0006471; 0003950; 0003956; 0016757; 0016020; 0005887	protein amino acid ADP-ribosylation; NAD+ ADP-ribosyltransferase activity; NAD(P)+-protein-arginine ADP-ribosyltransferase activity; transferase activity transferring glycosyl groups; membrane; integral to plasma membrane	ART3	0.31899	0.64587	2.00626	0.00156	ART3	216.917	686.964	358.549	398.718	185.102	321.851	498.814	402.382	383.662	159.244	1013.93	642.349	1673.02	725.155
1396482	ASPH	Homo sapiens aspartate beta-hydroxylase (ASPH), transcript variant 5, mRNA.	444	NM_020164.2	NP_064549.1	14589858	ILMN_1693771	610689	A	259	TAGGAATCTATGATGCTGATGGTGATGGAGATTTTGATGTGGATGATGCC	8	-	62756091-62756140						8q12.3a	ASPH	Penetrating at least one phospholipid bilayer of an endoplasmic reticulum membrane. May also refer to the state of being buried in the bilayer with no exposure outside the bilayer [goid 30176] [evidence IEA]; Penetrating at least one phospholipid bilayer of an endoplasmic reticulum membrane. May also refer to the state of being buried in the bilayer with no exposure outside the bilayer [goid 3017…	Any process specifically pertinent to the functioning of integrated living units: cells, tissues, organs, and organisms. A process is a collection of molecular events with a defined beginning and end [goid 8150] [evidence ND ]; A process whereby force is generated within muscle tissue, resulting in a change in muscle geometry. Force generation involves a chemo-mechanical energy conversion step. T…	Catalysis of the reaction: peptide L-aspartate + 2-oxoglutarate + O2 = peptide 3-hydroxy-L-aspartate + succinate + CO2 [goid 4597] [evidence IEA]; Interacting selectively with iron (Fe) ions [goid 5506] [evidence IEA]; Catalysis of the reaction: peptide L-aspartate + 2-oxoglutarate + O2 = peptide 3-hydroxy-L-aspartate + succinate + CO2 [goid 4597] [evidence IEA]; Interacting selectively with iron…	BAH; junctin; HAAH; CASQ2BP1; JCTN	BAH; junctin; HAAH; CASQ2BP1; JCTN	ASPH	0018193; 0006936; 0005506; 0005489; 0004597; 0005509; 0008307; 0005488; 0016491; 0016702; 0005789; 0016021; 0030176; 0016020	peptidyl-amino acid modification; muscle contraction; iron ion binding; electron transporter activity; peptide-aspartate beta-dioxygenase activity; calcium ion binding; structural constituent of muscle; binding; oxidoreductase activity; oxidoreductase activity acting on single donors with incorporation of molecular oxygen incorporation of two atoms of oxygen; endoplasmic reticulum membrane; integ…	ASPH	0.37469	0.21287	-1.77637	3e-05	ASPH	498.475	495.969	228.278	517.862	702.472	385.056	404.188	363.32	449.452	139.283	269.112	154.224	165.834	344.072
1392897	ASPRV1	Homo sapiens aspartic peptidase, retroviral-like 1 (ASPRV1), mRNA.	151516	NM_152792.1	NP_690005.1	22758145	ILMN_1762284	6290358	S	1922	AACTGTGGGACCCCTTCAGATTCCCTGAGGTATGGCTTGGTCACTCTCAG	2	-	70040930-70040979						2p14a	ASPRV1	Double layer of lipid molecules that encloses all cells, and, in eukaryotes, many organelles; may be a single or double lipid bilayer; also includes associated proteins [goid 16020] [evidence IEA]; Penetrating at least one phospholipid bilayer of a membrane. May also refer to the state of being buried in the bilayer with no exposure outside the bilayer. When used to describe a protein, indicates …	The process whose specific outcome is the progression of the skin over time, from its formation to the mature structure. The skin is the external membranous integument of an animal. In vertebrates the skin generally consists of two layers, an outer nonsensitive and nonvascular epidermis (cuticle or skarfskin) composed of cells which are constantly growing and multiplying in the deeper, and being …	Catalysis of the hydrolysis of internal, alpha-peptide bonds in a polypeptide chain by a mechanism in which a water molecule bound by the side chains of aspartic residues at the active center acts as a nucleophile [goid 4190] [pmid 16098038] [evidence IDA]; Catalysis of the hydrolysis of a peptide bond. A peptide bond is a covalent bond formed when the carbon atom from the carboxyl group of one a…	MUNO; SASPase; SASP; Taps	MUNO; SASPase; SASP; Taps	FLJ25084	0006633; 0006508; 0008897; 000287; 0004190	fatty acid biosynthesis; proteolysis and peptidolysis; phosphopantetheinyltransferase activity; magnesium ion binding; aspartic-type endopeptidase activity	ASPRV1	0.27232	0.47638	1.73338	1.6572e-07	ASPRV1	375.292	461.733	358.579	414.73	163.391	283.308	274.842	303.528	329.425	93.4117	812.847	668.098	774.244	607.182
1383540	ASTN1	Homo sapiens astrotactin 1 (ASTN1), transcript variant 1, mRNA.	460	NM_004319.1	NP_004310.1	46488922	ILMN_1684959	510703	I	6979	CAACACTCTCCCAGCTCCCATGTCCCCAAGACCTCTGGAGTTTCCTCTTG	1	-	175097111-175097160						1q25.2a	ASTN1	The part of a cell or its extracellular environment in which a gene product is located. A gene product may be located in one or more parts of a cell and its location may be as specific as a particular macromolecular complex, that is, a stable, persistent association of macromolecules that function together [goid 5575] [evidence ND ]; Double layer of lipid molecules that encloses all cells, and, i…	The specific movement from place to place of an organism in response to external or internal stimuli. Locomotion of a whole organism in a manner dependent upon some combination of that organism's internal state and external conditions [goid 7626] [evidence IEA]; The attachment of one cell to another cell via adhesion molecules [goid 16337] [evidence IEA]; The orderly movement of cells from one si…	Interacting selectively with any protein or protein complex (a complex of two or more proteins that may include other nonprotein molecules) [goid 5515] [evidence IEA]	ASTN; KIAA1747; ASTN1	ASTN; KIAA1747; ASTN1	ASTN	0007158; 0016477; 0007155; 0005515; 0016021	neuron adhesion; cell migration; cell adhesion; protein binding; integral to membrane	ASTN1	2.62533	1.74593	-1.51753	1.79842e-09	ASTN1	2922.07	2579.83	3140.7	3094.46	3952.66	3679.78	3781.96	3740.44	3361.49	492.127	1817.1	1350.1	1809.64	2514.9
1391879	ATG16L2	Homo sapiens ATG16 autophagy related 16-like 2 (S. cerevisiae) (ATG16L2), mRNA.	89849	NM_033388.1	NP_203746.1	55743107	ILMN_1664644	10204	S	1838	TGCTACTCCGGGAGCCACATGGTGAGCGTGGACCAGGGCAGGAAGGTTGT	11	+	72218021-72218070						11q13.4b	ATG16L2	All of the contents of a cell excluding the plasma membrane and nucleus, but including other subcellular structures [goid 5737] [evidence IEA]	The process by which cells digest parts of their own cytoplasm; allows for both recycling of macromolecular constituents under conditions of cellular stress and remodeling the intracellular structure for cell differentiation [goid 6914] [evidence IEA]; The directed movement of proteins into, out of, within or between cells [goid 15031] [evidence IEA]		FLJ00012; WDR80	FLJ00012; WDR80	ATG16L2	0016567; 0004842; 0046872; 0008270; 000151; 0005634	protein ubiquitination; ubiquitin-protein ligase activity; metal ion binding; zinc ion binding; ubiquitin ligase complex; nucleus	ATG16L2	0.10451	0.19666	1.86457	3e-05	ATG16L2	171.241	250.41	95.5954	121.085	88.7455	103.266	92.3717	116.653	129.921	55.386	227.414	318.322	232.733	216.763
1391518	ATG7	Homo sapiens ATG7 autophagy related 7 homolog (S. cerevisiae) (ATG7), mRNA.	10533	NM_006395.1	NP_006386.1	5453667	ILMN_1790978	4180592	S	2288	GGCCAGTGTTCGGCGTTGCTCGGGATTCAAGATACCACCAGTTCAGAGCT	3	+	11571483-11571532						3p25.3a-p25.2b	ATG7	All of the contents of a cell excluding the plasma membrane and nucleus, but including other subcellular structures [goid 5737] [pmid 18029348] [evidence IDA]; All of the contents of a cell excluding the plasma membrane and nucleus, but including other subcellular structures [goid 5737] [pmid 10233149] [evidence TAS]	The covalent or non-covalent attachment of lipid moieties to an amino acid in a protein [goid 6497] [pmid 12890687] [evidence IDA]; The chemical reactions and pathways resulting in the breakdown of a protein or peptide by hydrolysis of its peptide bonds, initiated by the covalent attachment of a ubiquitin moiety, or multiple ubiquitin moieties, to the protein [goid 6511] [evidence IEA]; The proce…	Catalysis of a biochemical reaction at physiological temperatures. In biologically catalyzed reactions, the reactants are known as substrates, and the catalysts are naturally occurring macromolecular substances known as enzymes. Enzymes possess specific binding sites for substrates, and are usually composed wholly or largely of protein, but RNA that has catalytic activity (ribozyme) is often also…	APG7L; DKFZp434N0735; GSA7	APG7L; DKFZp434N0735; GSA7	ATG7	0031401; 0006512; 0006944; 0006914; 0006497; 0015031; 0004839; 0003824; 0005737	positive regulation of protein modification; ubiquitin cycle; membrane fusion; autophagy; protein amino acid lipidation; protein transport; ubiquitin activating enzyme activity; catalytic activity; cytoplasm	ATG7	1.0281	0.69128	-1.50095	0.00214	ATG7	938.044	721.144	1118.68	1412.9	1270.6	1502.3	1631.79	1537.51	1266.62	318.72	876.441	821.501	618.499	668.199
1396450	ATM	Homo sapiens ataxia telangiectasia mutated (ATM), transcript variant 1, mRNA.	472	NM_000051.3	NP_000042.3	71902539	ILMN_1779214	4260392	A	12641	ATTTCAGGCGAAAAGAATCTGGGGTTTGCCAGTCAGTTGCTCAAAAGGTC	11	+	107744530-107744579	3870670	I	211	CAGGGTTTGAACCGGAAGCGGGAGTAGGTAGCTGCGTGGCTAACGGAGAA	107598979-107599028	11q22.3c	ATM	The array of microtubules and associated molecules that forms between opposite poles of a eukaryotic cell during mitosis or meiosis and serves to move the duplicated chromosomes apart [goid 5819] [evidence IEA]; A membrane-bounded organelle of eukaryotic cells in which chromosomes are housed and replicated. In most cells, the nucleus contains all of the cell's chromosomes except the organellar ch…	A signal transduction pathway, induced by DNA damage, that blocks cell cycle progression (in G1, G2 or metaphase) or slows the rate at which S phase proceeds [goid 77] [evidence IEA]; The formation of mesodermal clusters that are arranged segmentally along the anterior posterior axis of an embryo [goid 1756] [evidence IEA]; The process of restoring DNA after damage. Genomes are subject to damage …	Interacting selectively with DNA (deoxyribonucleic acid) [goid 3677] [evidence IEA]; Catalysis of the reaction: ATP + a protein serine/threonine = ADP + protein serine/threonine phosphate [goid 4674] [pmid 11375976] [evidence IDA]; Catalysis of the reaction: ATP + 1-phosphatidyl-1D-myo-inositol = ADP + 1-phosphatidyl-1D-myo-inositol 3-phosphate [goid 16303] [pmid 11375976] [evidence IMP]; Catalys…	ATD; TELO1; ATA; AT1; ATC; DKFZp781A0353; ATE; TEL1; ATDC; MGC74674	ATD; TELO1; ATA; AT1; ATC; DKFZp781A0353; ATE; TEL1; ATDC; MGC74674	ATM	0006355; 0007165; 0007049; 0045786; 0007131; 0006281; 0005515; 0003677; 0016740; 0004674; 0043565; 0003700; 0016773; 0005622; 005634	regulation of transcription DNA-dependent; signal transduction; cell cycle; negative regulation of progression through cell cycle; meiotic recombination; DNA repair; protein binding; DNA binding; transferase activity; protein serine/threonine kinase activity; sequence-specific DNA binding; transcription factor activity; phosphotransferase activity alcohol group as acceptor; intracellular; nucleus	ATM	0.64871	0.9871	1.50776	0.00933	ATM	1064.82	1430.59	710.481	739.061	590.963	664.882	532.617	539.202	784.078	311.434	1865.25	1004.94	1476.16	1261.25
1389766	ATOH8	Homo sapiens atonal homolog 8 (Drosophila) (ATOH8), mRNA.	84913	NM_032827.3	NP_116216.1	34222346	ILMN_1654065	130068	S	2175	TGAGGAAGGAGTAGAGGCTGGGTTGGCTGGAGCCGTCCTACTGGGCAAGA	2	+	85868440-85868489						2p11.2f	ATOH8	A membrane-bounded organelle of eukaryotic cells in which chromosomes are housed and replicated. In most cells, the nucleus contains all of the cell's chromosomes except the organellar chromosomes, and is the site of RNA synthesis and processing. In some species, or in specialized cell types, RNA metabolism or DNA replication may be absent [goid 5634] [evidence IEA]	Any process that modulates the frequency, rate or extent of DNA-dependent transcription [goid 6355] [evidence IEA]; The biological process whose specific outcome is the progression of a multicellular organism over time from an initial condition (e.g. a zygote or a young adult) to a later condition (e.g. a multicellular animal or an aged adult) [goid 7275] [evidence IEA]; The process whose specifi…	Interacting selectively with DNA (deoxyribonucleic acid) [goid 3677] [evidence IEA]; Plays a role in regulating transcription; may bind a promoter or enhancer DNA sequence or interact with a DNA-binding transcription factor [goid 30528] [evidence IEA]	HATH6; FLJ14708; FLJ38730	HATH6; FLJ14708; FLJ38730	ATOH8	0045449; 0030528; 0005634	regulation of transcription; transcription regulator activity; nucleus	ATOH8	0.33448	0.62646	1.85585	0.00263	ATOH8	196.939	711.913	250.688	277.173	142.991	454.222	607.269	591.905	404.138	215.323	567.017	1348.43	1646.67	866.548
1395621	ATP13A1	Homo sapiens ATPase type 13A1 (ATP13A1), mRNA.	57130	NM_020410.1	NP_065143.1	9966896	ILMN_1791904	2490315	S	3214	GTCCTGCAGTTCTTCCTGGGGACCCCGAAGCTGAAAGTGCCTTCCTGAGA	19	-	19617228-19617230:19617231-19617277						19p13.11a	ATP13A1	Double layer of lipid molecules that encloses all cells, and, in eukaryotes, many organelles; may be a single or double lipid bilayer; also includes associated proteins [goid 16020] [evidence IEA]; Penetrating at least one phospholipid bilayer of a membrane. May also refer to the state of being buried in the bilayer with no exposure outside the bilayer. When used to describe a protein, indicates …	The directed movement of substances (such as macromolecules, small molecules, ions) into, out of, within or between cells, or within a multicellular organism [goid 6810] [evidence IEA]; The directed movement of cations, atoms or small molecules with a net positive charge, into, out of, within or between cells [goid 6812] [evidence IEA]; The chemical reactions and pathways, including anabolism and…	Interacting selectively with a nucleotide, any compound consisting of a nucleoside that is esterified with (ortho)phosphate or an oligophosphate at any hydroxyl group on the ribose or deoxyribose moiety [goid 166] [evidence IEA]; Interacting selectively with magnesium (Mg) ions [goid 287] [evidence IEA]; Interacting selectively with ATP, adenosine 5'-triphosphate, a universally important coenzyme…	FLJ41786; CGI-152; FLJ31858; FLJ90317; ATP13A; DKFZp761L1623; KIAA1825; FLJ43873	FLJ41786; CGI-152; FLJ31858; FLJ90317; ATP13A; DKFZp761L1623; KIAA1825; FLJ43873	ATP13A1	0008152; 0006812; 0015992; 0016820; 000166; 000287; 0016787; 0016887; 0005524; 0015662; 0016021; 00016020	metabolism; cation transport; proton transport; hydrolase activity acting on acid anhydrides catalyzing transmembrane movement of substances; nucleotide binding; magnesium ion binding; hydrolase activity; ATPase activity; ATP binding; ATPase activity coupled to transmembrane movement of ions phosphorylative mechanism; integral to membrane; membrane	ATP13A1	0.47165	0.74923	1.57403	1.73647e-14	ATP13A1	606.243	673.258	589.976	565.672	503.248	684.23	471.501	440.625	566.844	89.6486	829.07	980.91	1006.88	990.201
1387171	ATP2B2	Homo sapiens ATPase, Ca++ transporting, plasma membrane 2 (ATP2B2), transcript variant 2, mRNA.	491	NM_001683.2	NP_001674.2	48255948	ILMN_1802223	1450327	A	6338	GCCTGGCTTAGGGAACAGGGAGCGATGGAAGAATGCCAACATTAGCGTTG	3	-	10343026-10343075						3p25.3b	ATP2B2	Double layer of lipid molecules that encloses all cells, and, in eukaryotes, many organelles; may be a single or double lipid bilayer; also includes associated proteins [goid 16020] [evidence IEA]; All of the contents of a cell excluding the plasma membrane and nucleus, but including other subcellular structures [goid 5737] [pmid 15765049] [evidence IDA]; The membrane surrounding a cell that sepa…	The directed movement of substances (such as macromolecules, small molecules, ions) into, out of, within or between cells, or within a multicellular organism [goid 6810] [evidence IEA]; The directed movement of cations, atoms or small molecules with a net positive charge, into, out of, within or between cells [goid 6812] [evidence IEA]; The directed movement of cations, atoms or small molecules w…	Interacting selectively with ATP, adenosine 5'-triphosphate, a universally important coenzyme and enzyme regulator [goid 5524] [evidence IEA]; Catalysis of the transfer of a solute or solutes from one side of a membrane to the other according to the reaction: ATP + H2O = ADP + phosphate, to directly drive the transport of ions across a membrane. The reaction is characterized by the transient form…	PMCA2; PMCA2i; PMCA2a	PMCA2; PMCA2i; PMCA2a	ATP2B2	0008152; 0006816; 0006812; 0016820; 000166; 000287; 0016787; 0005516; 0005388; 0005509; 0005524; 0016021; 0005886	metabolism; calcium ion transport; cation transport; hydrolase activity acting on acid anhydrides catalyzing transmembrane movement of substances; nucleotide binding; magnesium ion binding; hydrolase activity; calmodulin binding; calcium-transporting ATPase activity; calcium ion binding; ATP binding; integral to membrane; plasma membrane	ATP2B2	1.68988	1.07213	-1.5907	0.00181	ATP2B2	2138.47	1685.77	1502.52	2532.97	2695.87	2776.59	1837.33	1635.33	2100.61	509.235	705.996	625.698	552.431	2029.74
1396072	ATP2B3	Homo sapiens ATPase, Ca++ transporting, plasma membrane 3 (ATP2B3), transcript variant 1, mRNA.	492	NM_021949.2	NP_068768.2	48255952	ILMN_1660741	1450259	A	6302	CTTGTTTTTGCAGTCTTCAAGGCTGGGGGCCCTGTCTCATTGGGAAGCCC	X	+	152501309-152501358	580349	I	3571	ACCCCTACTCACGCAATTCTCTCTGCTGCCAATCCTACCAGTGCTGCTGG	152488357-152488406	Xq28f	ATP2B3	Double layer of lipid molecules that encloses all cells, and, in eukaryotes, many organelles; may be a single or double lipid bilayer; also includes associated proteins [goid 16020] [evidence IEA]; A compound membranous cytoplasmic organelle of eukaryotic cells, consisting of flattened, ribosome-free vesicles arranged in a more or less regular stack. The Golgi apparatus differs from the endoplasm…	The directed movement of substances (such as macromolecules, small molecules, ions) into, out of, within or between cells, or within a multicellular organism [goid 6810] [evidence IEA]; The directed movement of cations, atoms or small molecules with a net positive charge, into, out of, within or between cells [goid 6812] [evidence IEA]; The directed movement of calcium (Ca) ions into, out of, wit…	Interacting selectively with ATP, adenosine 5'-triphosphate, a universally important coenzyme and enzyme regulator [goid 5524] [evidence IEA]; Catalysis of the transfer of a solute or solutes from one side of a membrane to the other according to the reaction: ATP + H2O = ADP + phosphate, to directly drive the transport of ions across a membrane. The reaction is characterized by the transient form…	PMCA3; PMCA3a	PMCA3; PMCA3a	ATP2B3	0008152; 0006816; 0006812; 0016820; 000166; 000287; 0016787; 0005516; 0005388; 0005509; 0005524; 0016021; 0005886	metabolism; calcium ion transport; cation transport; hydrolase activity acting on acid anhydrides catalyzing transmembrane movement of substances; nucleotide binding; magnesium ion binding; hydrolase activity; calmodulin binding; calcium-transporting ATPase activity; calcium ion binding; ATP binding; integral to membrane; plasma membrane	ATP2B3	0.26822	0.143	-1.8929	0.00383	ATP2B3	370.592	259.216	118.588	461.698	561.863	406.559	190.534	206.516	321.946	152.362	173.333	101.268	45.6834	249.389
1394662	ATP5G3	Homo sapiens ATP synthase, H+ transporting, mitochondrial F0 complex, subunit c (subunit 9) isoform 3 (ATP5G3), nuclear gene encoding mitochondrial protein, transcript variant 1, mRNA.	518	NM_001002256.1	NP_001002256.1	50659071	ILMN_1770466	5570717	A	788	GCATTCAGGCAGATGCTGTCCCATTCAGAGGAAGCTACAGCAGTTGCTCC	2	-	175751013-175751062						2q31.1g	ATP5G3	A semiautonomous, self replicating organelle that occurs in varying numbers, shapes, and sizes in the cytoplasm of virtually all eukaryotic cells. It is notably the site of tissue respiration [goid 5739] [evidence IEA]; A proton-transporting ATP synthase complex found in the mitochondrial membrane [goid 5753] [pmid 7698763] [evidence TAS]; Double layer of lipid molecules that encloses all cells, …	The directed movement of charged atoms or small charged molecules into, out of, within or between cells [goid 6811] [evidence IEA]; The transport of protons across a membrane to generate an electrochemical gradient (proton-motive force) that powers ATP synthesis [goid 15986] [evidence IEA]; The directed movement of protons (hydrogen ions) into, out of, within or between cells [goid 15992] [eviden…	Enables the directed movement of substances (such as macromolecules, small molecules, ions) into, out of, within or between cells [goid 5215] [pmid 7698763] [evidence NAS]; Interacting selectively with any protein or protein complex (a complex of two or more proteins that may include other nonprotein molecules) [goid 5515] [pmid 14667819] [evidence IPI]; Interacting selectively with a lipid [goid…	MGC125738	MGC125738; P3	ATP5G3	0006811; 0006091; 0015986; 0015992; 0046933; 0046961; 0008289; 0005515; 0005215; 0045263; 0005624; 0016469; 0005753; 0016020; 005739	ion transport; generation of precursor metabolites and energy; ATP synthesis coupled proton transport; proton transport; hydrogen-transporting ATP synthase activity rotational mechanism; hydrogen-transporting ATPase activity rotational mechanism; lipid binding; protein binding; transporter activity; proton-transporting ATP synthase complex coupling factor F(o); membrane fraction; proton-transport…	ATP5G3	0.51804	0.30757	-1.69979	0.00078	ATP5G3	856.152	489.995	279.901	673.718	922.588	545.153	604.352	650.526	627.798	203.215	325.95	154.269	366.183	291.477
1395332	ATP6V1C1	Homo sapiens ATPase, H+ transporting, lysosomal 42kDa, V1 subunit C1 (ATP6V1C1), transcript variant 1, mRNA.	528	NM_001695.3	NP_001686.1	55956925	ILMN_1659801	5340450	A	5402	GAGTAAAGCCATGGAAGCCATGAACAGTAAGAGACTGCCGCCTGGCATGG	8	+	104154180-104154229	3870053	I	265	CCTGTCAGCAAACATGGGAGAAATTGCATGCGGCAACTTCAAAGAACAAT	104122281-104122330	8q22.3c	ATP6V1C1	A large protein complex that catalyzes the synthesis or hydrolysis of ATP by a rotational mechanism, coupled to the transport of protons across a membrane. The complex comprises a membrane sector (F0, V0, or A0) that carries out proton transport and a cytoplasmic compartment sector (F1, V1, or A1) that catalyzes ATP synthesis or hydrolysis. Two major types have been characterized: V-type ATPases …	The directed movement of charged atoms or small charged molecules into, out of, within or between cells [goid 6811] [evidence IEA]; The directed movement of protons (hydrogen ions) into, out of, within or between cells [goid 15992] [pmid 8250920] [evidence TAS]	Interacting selectively with ATP, adenosine 5'-triphosphate, a universally important coenzyme and enzyme regulator [goid 5524] [evidence IEA]; Catalysis of the hydrolysis of an acid anhydride to directly drive the transport of a substance across a membrane [goid 16820] [evidence IEA]; Enables the directed movement of substances (such as macromolecules, small molecules, ions) into, out of, within …	VATC; FLJ20057; ATP6D; Vma5; ATP6C	VATC; FLJ20057; ATP6D; Vma5; ATP6C	ATP6V1C1	0006811; 0015986; 0015992; 0016820; 0046872; 0046961; 0016787; 0005215; 0005524; 00016469	ion transport; ATP synthesis coupled proton transport; proton transport; hydrolase activity acting on acid anhydrides catalyzing transmembrane movement of substances; metal ion binding; hydrogen-transporting ATPase activity rotational mechanism; hydrolase activity; transporter activity; ATP binding; proton-transporting two-sector ATPase complex	ATP6V1C1	1.14945	0.61488	-1.8866	3e-05	ATP6V1C1	1503.89	1225.8	697.722	1748.35	2730.27	1527.8	987.406	990.101	1426.42	629.546	716.536	643.018	571.35	961.894
1396550	ATP8A2	Homo sapiens ATPase, aminophospholipid transporter-like, Class I, type 8A, member 2 (ATP8A2), mRNA.	51761	NM_016529.3	NP_057613.3	38372937	ILMN_1693896	4880731	S	3779	GCCAACCCAAACCCGCGCCTTTCCTTGTTCCACTGCAGACTCAGATACAG	13	+	25492871-25492920						13q12.13a-q12.13b	ATP8A2	Double layer of lipid molecules that encloses all cells, and, in eukaryotes, many organelles; may be a single or double lipid bilayer; also includes associated proteins [goid 16020] [evidence IEA]; Penetrating at least one phospholipid bilayer of a membrane. May also refer to the state of being buried in the bilayer with no exposure outside the bilayer. When used to describe a protein, indicates …	The directed movement of substances (such as macromolecules, small molecules, ions) into, out of, within or between cells, or within a multicellular organism [goid 6810] [evidence IEA]; Any process that stops, prevents or reduces the rate or extent of cell proliferation [goid 8285] [pmid 10551800] [evidence TAS]; The directed movement of phospholipids into, out of, within or between cells. Phosph…	Interacting selectively with a nucleotide, any compound consisting of a nucleoside that is esterified with (ortho)phosphate or an oligophosphate at any hydroxyl group on the ribose or deoxyribose moiety [goid 166] [evidence IEA]; Interacting selectively with magnesium (Mg) ions [goid 287] [evidence IEA]; Catalysis of the movement of phospholipids from one membrane face to the other ('flippase' ac…	ATP; DKFZP434B1913; ML-1; IB; ATPIB	ATP; DKFZP434B1913; ML-1; IB; ATPIB	ATP8A2	0006812; 0008285; 0016820; 000166; 000287; 0004012; 0016787; 0016887; 0005524; 0016021; 00016020	cation transport; negative regulation of cell proliferation; hydrolase activity acting on acid anhydrides catalyzing transmembrane movement of substances; nucleotide binding; magnesium ion binding; phospholipid-translocating ATPase activity; hydrolase activity; ATPase activity; ATP binding; integral to membrane; membrane	ATP8A2	0.64503	0.31597	-2.06026	1e-05	ATP8A2	495.836	584.206	634.595	562.747	706.094	1368.84	980.201	935.496	783.502	293.692	228.962	400.39	173.765	582.71
1381290	ATP9A	Homo sapiens ATPase, class II, type 9A (ATP9A), mRNA.	10079	NM_006045.1	NP_006036.1	65301138	ILMN_1799232	520070	S	5366	TCCCAGGAGGGGCTGAAGAAGCCATAGTTGGAAGTGGAAGGTACTCGTCA	20	-	49648885-49648934						20q13.2a	ATP9A	Double layer of lipid molecules that encloses all cells, and, in eukaryotes, many organelles; may be a single or double lipid bilayer; also includes associated proteins [goid 16020] [evidence IEA]; Penetrating at least one phospholipid bilayer of a membrane. May also refer to the state of being buried in the bilayer with no exposure outside the bilayer. When used to describe a protein, indicates …	The directed movement of substances (such as macromolecules, small molecules, ions) into, out of, within or between cells, or within a multicellular organism [goid 6810] [evidence IEA]; The chemical reactions and pathways, including anabolism and catabolism, by which living organisms transform chemical substances. Metabolic processes typically transform small molecules, but also include macromole…	Interacting selectively with a nucleotide, any compound consisting of a nucleoside that is esterified with (ortho)phosphate or an oligophosphate at any hydroxyl group on the ribose or deoxyribose moiety [goid 166] [evidence IEA]; Interacting selectively with magnesium (Mg) ions [goid 287] [evidence IEA]; Catalysis of the movement of phospholipids from one membrane face to the other ('flippase' ac…	KIAA0611; ATPIIA	KIAA0611; ATPIIA	ATP9A	0006812; 0008152; 0016887; 000166; 000287; 0004012; 0016787; 0005524; 0016020; 0016021	cation transport; metabolism; ATPase activity; nucleotide binding; magnesium ion binding; phospholipid-translocating ATPase activity; hydrolase activity; ATP binding; membrane; integral to membrane	ATP9A	0.5013	0.31049	-1.62939	0.00188	ATP9A	310.672	410.292	457.928	585.571	715.513	1100.01	619.695	647.189	605.858	240.767	274.977	569.248	281.445	478.279
1392291	ATRX	Homo sapiens alpha thalassemia/mental retardation syndrome X-linked (RAD54 homolog, S. cerevisiae) (ATRX), transcript variant 2, mRNA.	546	NM_138270.1	NP_612114.1	20336204	ILMN_1666885	6020156	A	186	CAGAAGCCGACAAGGCGTTCAAGCGAAAACATGACCGCTGAGCCCATGAG	X	-	76859376-76859376:76928124-76928143:76928144-76928172						Xq21.1a	ATRX	A membrane-bounded organelle of eukaryotic cells in which chromosomes are housed and replicated. In most cells, the nucleus contains all of the cell's chromosomes except the organellar chromosomes, and is the site of RNA synthesis and processing. In some species, or in specialized cell types, RNA metabolism or DNA replication may be absent [goid 5634] [pmid 7874112] [evidence TAS]; A condensed fo…	The process of restoring DNA after damage. Genomes are subject to damage by chemical and physical agents in the environment (e.g. UV and ionizing radiations, chemical mutagens, fungal and bacterial toxins, etc.) and by free radicals or alkylating agents endogenously generated in metabolism. DNA is also damaged because of errors during its replication. A variety of different DNA repair pathways ha…	Interacting selectively with DNA (deoxyribonucleic acid) [goid 3677] [evidence IEA]; Interacting selectively with ATP, adenosine 5'-triphosphate, a universally important coenzyme and enzyme regulator [goid 5524] [evidence IEA]; Interacting selectively with a nucleotide, any compound consisting of a nucleoside that is esterified with (ortho)phosphate or an oligophosphate at any hydroxyl group on t…	XNP; ZNF-HX; MRXHF1; XH2; ATR2; SFM1; SHS; MRXS3; RAD54L; RAD54; MGC2094	XNP; ZNF-HX; MRXHF1; XH2; ATR2; SFM1; SHS; MRXS3; RAD54L; RAD54; MGC2094	ATRX	0006310; 0006355; 0007605; 0006306; 0007001; 0006281; 0046872; 000166; 0016787; 0005515; 0003678; 0005524; 0003700; 0005720; 0005634	DNA recombination; regulation of transcription DNA-dependent; sensory perception of sound; DNA methylation; chromosome organization and biogenesis (sensu Eukaryota); DNA repair; metal ion binding; nucleotide binding; hydrolase activity; protein binding; DNA helicase activity; ATP binding; transcription factor activity; nuclear heterochromatin; nucleus	ATRX	0.17201	0.11052	-1.57071	4e-05	ATRX	272.193	222.177	166.59	227.026	236.657	240.458	162.772	138.38	208.282	46.5453	174.041	99.6402	140.651	147.405
1379227	ATXN7L2	Homo sapiens ataxin 7-like 2 (ATXN7L2), mRNA.	127002	NM_153340.2	NP_699171.2	31377554	ILMN_1664177	5360451	S	2167	GTCAAAAGCCCATTAACGAGAAAGTGCCTGCCCACTGCAACGGAGCCGCC	1	+	109835860-109835862:109836731-109836777						1p13.3b	ATXN7L2				FLJ00381; MGC46534	FLJ00381; MGC46534	ATXN7L2	0006754; 0006118; 0005515; 0008720; 0005739	ATP biosynthesis; electron transport; protein binding; D-lactate dehydrogenase activity; mitochondrion	ATXN7L2	0.17771	0.27017	1.50639	9.03339e-06	ATXN7L2	285.605	256.885	230.374	177.048	213.117	201.557	191.905	166.461	215.369	40.5123	266.489	395.279	327.742	452.345
1389192	AVP	Homo sapiens arginine vasopressin (neurophysin II, antidiuretic hormone, diabetes insipidus, neurohypophyseal) (AVP), mRNA.	551	NM_000490.3	NP_000481.2	50959227	ILMN_1811443	150050	S	50	GATGCCTGACACCATGCTGCCCGCCTGCTTCCTCGGCCTACTGGCCTTCT	20	-	3013271-3013320						20p13c	AVP	The space external to the outermost structure of a cell. For cells without external protective or external encapsulating structures this refers to space outside of the plasma membrane. This term covers the host cell environment outside an intracellular parasite [goid 5576] [evidence IEA]; The space external to the outermost structure of a cell. For cells without external protective or external en…	The process of renal water excretion [goid 30146] [evidence IEA]; Any process that activates or increases the frequency, rate or extent of the chemical reactions and pathways resulting in the formation of the nucleotide cAMP (cyclic AMP, adenosine 3',5'-cyclophosphate) [goid 30819] [evidence IEA]; The chemical reactions and pathways resulting in the formation of precursor metabolites, substances …	[goid 5185] [evidence IEA]; [goid 5185] [evidence IEA]	AVRP; ADH; AVP-NPII; VP; ARVP	AVRP; ADH; AVP-NPII; VP; ARVP	AVP	0007267; 0006833; 0007165; 0006091; 0042310; 0005185; 0005576; 0005625	cell-cell signaling; water transport; signal transduction; generation of precursor metabolites and energy; vasoconstriction; neurohypophyseal hormone activity; extracellular region; soluble fraction	AVP	0.04725	0.07641	1.60248	5e-05	AVP	70.1671	50.4447	48.6052	62.7599	62.7969	35.3486	42.1256	64.0555	54.5379	12.2178	69.3502	145.655	70.6749	147.726
1379645	AXIN1	Homo sapiens axin 1 (AXIN1), transcript variant 2, mRNA.	8312	NM_181050.1	NP_851393.1	31083143	ILMN_1766185	1940561	A	3103	CAGCTTGTCTCTTGCCTGCCACTGTGTGAATCGGCGACGGAGCACTGCAC	16	-	277628-277677						16p13.3f	AXIN1	The living contents of a cell; the matter contained within (but not including) the plasma membrane, usually taken to exclude large vacuoles and masses of secretory or ingested material. In eukaryotes it includes the nucleus and cytoplasm [goid 5622] [evidence IEA]; A membrane-bounded organelle of eukaryotic cells in which chromosomes are housed and replicated. In most cells, the nucleus contains …	A form of programmed cell death induced by external or internal signals that trigger the activity of proteolytic caspases, whose actions dismantle the cell and result in cell death. Apoptosis begins internally with condensation and subsequent fragmentation of the cell nucleus (blebbing) while the plasma membrane remains intact. Other characteristics of apoptosis include DNA fragmentation and the …	Mediates the transfer of a signal from the outside to the inside of a cell by means other than the introduction of the signal molecule itself into the cell [goid 4871] [pmid 9230313] [evidence NAS]; Interacting selectively with any protein or protein complex (a complex of two or more proteins that may include other nonprotein molecules) [goid 5515] [pmid 9601641] [evidence IPI]; Interacting selec…	AXIN; MGC52315	AXIN; MGC52315	AXIN1	0007049; 0007275; 0045786; 0006915; 0007222; 0007309; 0004871; 0005515; 0016328; 0005622; 0005737; 0005634	cell cycle; development; negative regulation of progression through cell cycle; apoptosis; frizzled signaling pathway; oocyte axis determination; signal transducer activity; protein binding; lateral plasma membrane; intracellular; cytoplasm; nucleus	AXIN1	0.55774	0.94051	1.67092	6.46738e-10	AXIN1	655.552	924.593	795.173	629.208	618.197	634.302	545.617	606.281	676.115	122.794	983.213	1681.21	1585.65	1122.92
1390004	AZGP1	Homo sapiens alpha-2-glycoprotein 1, zinc-binding (AZGP1), mRNA.	563	NM_001185.2	NP_001176.1	38372939	ILMN_1797154	1510324	S	1048	TGAGGAGCAGTGTGGGGGGACAGACAGGAGGTGGATTTGGAGACCGAAGA	7	-	99402405-99402454						7q22.1b	AZGP1	Double layer of lipid molecules that encloses all cells, and, in eukaryotes, many organelles; may be a single or double lipid bilayer; also includes associated proteins [goid 16020] [evidence IEA]; A transmembrane protein complex composed of a MHC class I alpha chain and an invariant beta2-microglobin chain, and with or without a bound peptide antigen. Class I here refers to classical class I mol…	Any immune system process that functions in the calibrated response of an organism to a potential internal or invasive threat [goid 6955] [evidence IEA]; The process by which an antigen-presenting cell expresses antigen (peptide or lipid) on its cell surface in association with an MHC protein complex [goid 19882] [evidence IEA]; Any immune system process that functions in the calibrated response …	Catalysis of the hydrolysis of phosphodiester bonds in chains of RNA [goid 4540] [pmid 10462714] [evidence NAS]; Interacting selectively with fatty acids, aliphatic monocarboxylic acids liberated from naturally occurring fats and oils by hydrolysis [goid 5504] [pmid 10206894] [evidence NAS]; Catalysis of the transfer of a protein from one side of a membrane to the other [goid 8320] [pmid 6896906]…	ZAG; ZA2G	ZAG; ZA2G	AZGP1	0019882; 0007155; 0016042; 0008285; 0030106; 0004540; 0008320; 0005504; 0005576; 00042612	antigen presentation; cell adhesion; lipid catabolism; negative regulation of cell proliferation; MHC class I receptor activity; ribonuclease activity; protein carrier activity; fatty acid binding; extracellular region; MHC class I protein complex	AZGP1	0.42597	1.2834	2.98542	0.00013	AZGP1	705.851	887.785	225.638	539.907	306.724	353.742	551.463	540.058	513.896	217.477	1314.01	4975.65	1136.94	2664.84
1394711	B3GALT3	Homo sapiens UDP-Gal:betaGlcNAc beta 1,3-galactosyltransferase, polypeptide 3 (B3GALT3), transcript variant 1, mRNA.	8706	NM_003781.2	NP_003772.1	15451873	ILMN_1787595	1450678	I	2517	CTGCTAATAGTAGGTCAAAGGGGAGCACTCCTTGCCCCCTGTTCCTGGGT	3	-	162285008-162285057						3q26.1a	B3GALT3				galT3; P1; B3GALNT1; GLCT3; P; Gb4Cer; beta3Gal-T3	galT3; P1; B3GALT3; GLCT3; P; Gb4Cer; GLOB; beta3Gal-T3	B3GALT3	0006486; 0047273; 0016757; 000287; 0008499; 0008378; 0016021; 0005795; 0016020	protein amino acid glycosylation; galactosylgalactosylglucosylceramide beta-D-acetylgalactosaminyltransferase activity; transferase activity transferring glycosyl groups; magnesium ion binding; UDP-galactose:beta-N-acetylglucosamine beta-13-galactosyltransferase activity; galactosyltransferase activity; integral to membrane; Golgi stack; membrane	B3GALT3	0.89917	0.49307	-1.84042	0.00014	B3GALT3	1166.05	923.055	620.46	1463.99	2085.19	975.276	767.801	834.459	1104.53	472.829	591.122	355.099	476.967	677.593
1394698	B3GAT1	Homo sapiens beta-1,3-glucuronyltransferase 1 (glucuronosyltransferase P) (B3GAT1), transcript variant 2, mRNA.	27087	NM_054025.1	NP_473366.1	16905509	ILMN_1761093	3460064	A	3039	CCCTGAGCCACCTTGCAGGACGTTTTCCCCAACCTCTTACACCCTGGATG	11	-	133754175-133754224	1440017	I	231	GACCTGCTAGCCAACATTCAGCTGCTCTGTCCTCTCCATGCCTGGCCGGC	133762876-133762925	11q25e	B3GAT1	The lipid bilayer surrounding any of the compartments of the Golgi apparatus [goid 139] [evidence IEA]; A compound membranous cytoplasmic organelle of eukaryotic cells, consisting of flattened, ribosome-free vesicles arranged in a more or less regular stack. The Golgi apparatus differs from the endoplasmic reticulum in often having slightly thicker membranes, appearing in sections as a characteri…	The chemical reactions and pathways involving carbohydrates, any of a group of organic compounds based of the general formula Cx(H2O)y. Includes the formation of carbohydrate derivatives by the addition of a carbohydrate residue to another molecule [goid 5975] [pmid 10783264] [evidence TAS]	Catalysis of the reaction: UDP-galactose + N-acetylglucosamine = galactose-beta-1,3-N-acetylglucosamine + UDP [goid 8499] [evidence IEA]; Catalysis of the reaction: UDP-glucuronate + 3-beta-D-galactosyl-4-beta-D-galactosyl-O-beta-D-xylosylprotein = UDP + 3-beta-D-glucuronosyl-3-beta-D-galactosyl-4-beta-D-galactosyl-O-beta-D-xylosylprotein [goid 15018] [evidence IEA]; Catalysis of the transfer of …	GLCATP; NK-1; HNK-1; LEU7; CD57; GlcAT-P	HNK1; NK-1; GLCATP; LEU7; HNK-1; GlcUAT-P; CD57; GlcAT-P	B3GAT1	0006486; 0005975; 0030145; 0046872; 0015018; 0016740; 0016021; 0005795; 00016020	protein amino acid glycosylation; carbohydrate metabolism; manganese ion binding; metal ion binding; galactosylgalactosylxylosylprotein 3-beta-glucuronosyltransferase activity; transferase activity; integral to membrane; Golgi stack; membrane	B3GAT1	0.61794	1.03684	1.66259	8.18223e-06	B3GAT1	841.266	1139.05	888.396	819.663	388.206	652.14	660.738	620.583	751.255	223.245	1429.88	1867.72	1822.98	1111.86
1387840	B4GALT6	Homo sapiens UDP-Gal:betaGlcNAc beta 1,4- galactosyltransferase, polypeptide 6 (B4GALT6), mRNA.	9331	NM_004775.2	NP_004766.1	13929471	ILMN_1732555	130463	S	3726	CAGTGAACTTAATATGTTTCTGTGAGAGTGACAGAGCTGTGCCCGTTTAT	18	-	27457187-27457236						18q12.1d	B4GALT6	A compound membranous cytoplasmic organelle of eukaryotic cells, consisting of flattened, ribosome-free vesicles arranged in a more or less regular stack. The Golgi apparatus differs from the endoplasmic reticulum in often having slightly thicker membranes, appearing in sections as a characteristic shallow semicircle so that the convex side (cis or entry face) abuts the endoplasmic reticulum, sec…	The chemical reactions and pathways involving carbohydrates, any of a group of organic compounds based of the general formula Cx(H2O)y. Includes the formation of carbohydrate derivatives by the addition of a carbohydrate residue to another molecule [goid 5975] [evidence IEA]; The chemical reactions and pathways involving carbohydrates, any of a group of organic compounds based of the general form…	Interacting selectively with magnesium (Mg) ions [goid 287] [evidence IEA]; Interacting selectively with calcium ions (Ca2+) [goid 5509] [evidence IEA]; Catalysis of the transfer of a galactosyl group to an acceptor molecule, typically another carbohydrate or a lipid [goid 8378] [pmid 9597550] [evidence TAS]; Catalysis of the transfer of a glycosyl group from one compound (donor) to another (acce…	beta4Gal-T6; B4Gal-T6	beta4Gal-T6; B4Gal-T6	B4GALT6	0005975; 0030145; 0016757; 000287; 0008378; 0005509; 0016021; 0005795	carbohydrate metabolism; manganese ion binding; transferase activity transferring glycosyl groups; magnesium ion binding; galactosyltransferase activity; calcium ion binding; integral to membrane; Golgi stack	B4GALT6	0.80703	0.32558	-2.50155	0.00023	B4GALT6	1496.44	783.747	340.475	1213.82	2139.34	902.895	499.143	532.708	988.571	603.514	319.221	134.453	124.538	503.143
1386502	BACH2	Homo sapiens BTB and CNC homology 1, basic leucine zipper transcription factor 2 (BACH2), mRNA.	60468	NM_021813.1	NP_068585.1	13540489	ILMN_1670695	650521	S	8587	CCAGAGGCCATATTCAAAACAGGGTCTTCTCAGTGTATGCAAGGGGCTGC	6	-	90693445-90693494						6q15d	BACH2	A membrane-bounded organelle of eukaryotic cells in which chromosomes are housed and replicated. In most cells, the nucleus contains all of the cell's chromosomes except the organellar chromosomes, and is the site of RNA synthesis and processing. In some species, or in specialized cell types, RNA metabolism or DNA replication may be absent [goid 5634] [evidence IEA]; A membrane-bounded organelle …	Any process that modulates the frequency, rate or extent of DNA-dependent transcription [goid 6355] [evidence IEA]; Any process that modulates the frequency, rate or extent of DNA-dependent transcription [goid 6355] [evidence IEA]	The function of binding to a specific DNA sequence in order to modulate transcription. The transcription factor may or may not also interact selectively with a protein or macromolecular complex [goid 3700] [evidence IEA]; Interacting selectively with DNA of a specific nucleotide composition, e.g. GC-rich DNA binding, or with a specific sequence motif or type of DNA e.g. promotor binding or rDNA b…			BACH2	0006355; 0006350; 0005515; 0003677; 0005634	regulation of transcription DNA-dependent; transcription; protein binding; DNA binding; nucleus	BACH2	0.10139	0.16024	1.56595	0.00052	BACH2	181.281	158.519	155.212	95.5273	104.633	102.081	92.8004	109.957	125.001	34.3838	234.261	337.285	179.498	190.954
1382161	BAG4	Homo sapiens BCL2-associated athanogene 4 (BAG4), mRNA.	9530	NM_004874.2	NP_004865.1	14574569	ILMN_1727996	2370327	S	1567	GGGGGCCAGGACTCTGTACGGCAGGCCAGAAAAGAGGCTGTTTGTAAGAT	8	+	38187079-38187128						8p12a	BAG4	All of the contents of a cell excluding the plasma membrane and nucleus, but including other subcellular structures [goid 5737] [evidence IEA]	The process of assisting in the covalent and noncovalent assembly of single chain polypeptides or multisubunit complexes into the correct tertiary structure [goid 6457] [pmid 9873016] [evidence TAS]; A form of programmed cell death induced by external or internal signals that trigger the activity of proteolytic caspases, whose actions dismantle the cell and result in cell death. Apoptosis begins …	[goid 5057] [pmid 9915703] [evidence TAS]; Interacting selectively with any protein or protein complex (a complex of two or more proteins that may include other nonprotein molecules) [goid 5515] [evidence IEA]	SODD; BAG-4	SODD; BAG-4	BAG4	0006915; 0006916; 0006457; 0005057; 0051082	apoptosis; anti-apoptosis; protein folding; receptor signaling protein activity; unfolded protein binding	BAG4	1.82141	1.14072	-1.61142	0.00135	BAG4	1091.87	1665.79	2423.72	1690.59	1944.79	3241.01	2984.28	3400.07	2305.27	839.925	855.013	1623.17	981.86	2428.61
1388029	BAIAP2L2	Homo sapiens BAI1-associated protein 2-like 2 (BAIAP2L2), mRNA.	80115	NM_025045.3	NP_079321.2	34147690	ILMN_1771652	160424	S	1989	AGGAGCCCCTTGTACCTGCTCCGTGCCCAACACATGCCCTCTCTGTACAT	22	-	36810882-36810931						22q13.1b	BAIAP2L2	A membrane-bounded organelle of eukaryotic cells in which chromosomes are housed and replicated. In most cells, the nucleus contains all of the cell's chromosomes except the organellar chromosomes, and is the site of RNA synthesis and processing. In some species, or in specialized cell types, RNA metabolism or DNA replication may be absent [goid 5634] [pmid 18029348] [evidence IDA]; All of the co…	The cascade of processes by which a signal interacts with a receptor, causing a change in the level or activity of a second messenger or other downstream target, and ultimately effecting a change in the functioning of the cell [goid 7165] [evidence IEA]; The process whose specific outcome is the progression of nervous tissue over time, from its formation to its mature state [goid 7399] [evidence …		FLJ22582	FLJ22582	BAIAP2L2	0007155; 0005509; 0005198	cell adhesion; calcium ion binding; structural molecule activity	BAIAP2L2	0.11711	0.20236	1.7121	0.00124	BAIAP2L2	242.759	229.695	133.431	103.402	91.2405	136.624	87.8238	136.115	145.136	59.6448	254.215	296.821	435.817	298.683
1382936	BASP1	Homo sapiens brain abundant, membrane attached signal protein 1 (BASP1), mRNA.	10409	NM_006317.3	NP_006308.3	30795230	ILMN_1651826	2640044	S	1410	CAGACAGAGCCCACTTAGCTTGTCCACATGGATCTCAATGCCAATCCTCC	5	+	17329556-17329605						5p15.1b	BASP1	Any of the various filamentous elements that form the internal framework of cells, and typically remain after treatment of the cells with mild detergent to remove membrane constituents and soluble components of the cytoplasm. The term embraces intermediate filaments, microfilaments, microtubules, the microtrabecular lattice, and other structures characterized by a polymeric filamentous nature and…			CAP-23; NAP22; CAP23; MGC8555; NAP-22	CAP-23; NAP22; CAP23; MGC8555; NAP-22	BASP1	0005856; 0005886	cytoskeleton; plasma membrane	BASP1	16.6917	10.1145	-1.66546	0.00225	BASP1	18224.3	14994.4	10877.7	26392.8	31167.4	24407.9	18338.7	18773.6	20397.1	6540.38	8877.69	8141.9	4307.54	19197.5
1384888	BBS4	Homo sapiens Bardet-Biedl syndrome 4 (BBS4), mRNA.	585	NM_033028.2	NP_149017.2	25952121	ILMN_1762466	4540450	S	2228	CTAGATCCTATCAGGATGAGGAGCAGCAGCCCAGGGCTTGTCTGGATCAG	15	+	70817615-70817664						15q24.1a	BBS4	A network of small fibers that surrounds the centrioles in cells; contains the microtubule nucleating activity of the centrosome [goid 242] [pmid 15107855] [evidence IDA]; All of the contents of a cell excluding the plasma membrane and nucleus, but including other subcellular structures [goid 5737] [evidence IEA]; A cellular organelle, found close to the nucleus in many eukaryotic cells, consisti…	A process that is carried out at the cellular level which results in the formation, arrangement of constituent parts, or disassembly of cytoskeletal structures comprising microtubules and their associated proteins [goid 226] [evidence IEA]; The last step in the formation of the neural tube, where the paired neural folds are brought together and fuse at the dorsal midline [goid 1843] [evidence IEA…	Catalysis of movement along a microtubule, coupled to the hydrolysis of a nucleoside triphosphate (usually ATP) [goid 3777] [pmid 15107855] [evidence IMP]; Interacting selectively with any protein or protein complex (a complex of two or more proteins that may include other nonprotein molecules) [goid 5515] [pmid 15107855] [evidence IPI]; Interacting selectively with any part of a dynactin complex…			BBS4	5488	binding	BBS4	1.51203	0.97946	-1.55795	2.25949e-06	BBS4	1346.02	1200.84	1683.43	1740.45	2314.75	2231.71	2179.59	2418.94	1889.47	462.402	969.904	1606.52	1282.63	1217.6
1388146	BCAS4	Homo sapiens breast carcinoma amplified sequence 4 (BCAS4), transcript variant 1, mRNA.	55653	NM_017843.3	NP_060313.3	58294159	ILMN_1808059	6550427	A	1186	GGCTTTGCAGGGGCTCCATGGTCCTTCTCTCTGTGATGGGTTTTTGCACG	20	+	48926965-48927014						20q13.13f	BCAS4	All of the contents of a cell excluding the plasma membrane and nucleus, but including other subcellular structures [goid 5737] [evidence IEA]			FLJ20495	FLJ20495	BCAS4	0003676; 0008270; 0005634	nucleic acid binding; zinc ion binding; nucleus	BCAS4	0.67359	0.40721	-1.66941	0.00056	BCAS4	376.557	538.576	600.942	881.447	1134.43	1096.64	927.496	1008.2	820.536	280.299	306.331	380.125	469.537	665.151
1382704	BCL2L12	Homo sapiens BCL2-like 12 (proline rich) (BCL2L12), transcript variant 2, mRNA.	83596	NM_052842.2	NP_443074.2	20336331	ILMN_1752953	1430367	A	1488	GGCTGGGAGGGCATCCTGGCTGTTTCACCCGTGGACTTGAACTTGCCATT	19	+	54865552-54865557:54868767-54868810						19q13.33b	BCL2L12		A form of programmed cell death induced by external or internal signals that trigger the activity of proteolytic caspases, whose actions dismantle the cell and result in cell death. Apoptosis begins internally with condensation and subsequent fragmentation of the cell nucleus (blebbing) while the plasma membrane remains intact. Other characteristics of apoptosis include DNA fragmentation and the …		MGC120315; MGC120314; MGC120313	MGC120315; MGC120314; MGC120313	BCL2L12	6915	apoptosis	BCL2L12	0.19652	0.31743	1.60054	0.00022	BCL2L12	201.525	238.171	278.329	210.958	182.948	192.73	306.495	271.876	235.379	45.5952	327.108	324.751	793.312	410.787
1386993	BCL6B	Homo sapiens B-cell CLL/lymphoma 6, member B (zinc finger protein) (BCL6B), mRNA.	255877	NM_181844.2	NP_862827.1	38327514	ILMN_1672797	3800037	S	3245	GTTCTGCCCCTTGTTGCCCTGGGGCTTATCTGATTATGGGACGAGGGTAG	17	+	6873405-6873454						17p13.1d	BCL6B	The living contents of a cell; the matter contained within (but not including) the plasma membrane, usually taken to exclude large vacuoles and masses of secretory or ingested material. In eukaryotes it includes the nucleus and cytoplasm [goid 5622] [evidence IEA]; A membrane-bounded organelle of eukaryotic cells in which chromosomes are housed and replicated. In most cells, the nucleus contains …	Any process that stops, prevents or reduces the frequency, rate or extent of transcription from an RNA polymerase II promoter [goid 122] [evidence IEA]	Interacting selectively with DNA (deoxyribonucleic acid) [goid 3677] [evidence IEA]; Interacting selectively with any protein or protein complex (a complex of two or more proteins that may include other nonprotein molecules) [goid 5515] [evidence IEA]; Interacting selectively with zinc (Zn) ions [goid 8270] [evidence IEA]; Any transcription regulator activity that prevents or downregulates transc…	BAZF; ZBTB28; ZNF62	BAZF; ZBTB28; ZNF62	BCL6B	0046872; 0003676; 0008270; 0005515; 0005634	metal ion binding; nucleic acid binding; zinc ion binding; protein binding; nucleus	BCL6B	0.11354	0.18566	1.62021	0.00065	BCL6B	119.138	190.144	120.068	71.536	170.306	176.793	110.849	146.437	138.159	39.9473	151.197	298.878	257.159	309.001
1387154	BEX1	Homo sapiens brain expressed, X-linked 1 (BEX1), mRNA.	55859	NM_018476.3	NP_060946.3	68533248	ILMN_1702637	7150470	S	32	GGGAGCTGCAGAGCTACGCAGCCTTCGGTGCAGTCGTCACTCGTGTCTCG	X	-	102205743-102205792						Xq22.1e	BEX1	A membrane-bounded organelle of eukaryotic cells in which chromosomes are housed and replicated. In most cells, the nucleus contains all of the cell's chromosomes except the organellar chromosomes, and is the site of RNA synthesis and processing. In some species, or in specialized cell types, RNA metabolism or DNA replication may be absent [goid 5634] [evidence IEA]; All of the contents of a cell…	The biological process whose specific outcome is the progression of a multicellular organism over time from an initial condition (e.g. a zygote or a young adult) to a later condition (e.g. a multicellular animal or an aged adult) [goid 7275] [evidence IEA]; The process whose specific outcome is the progression of nervous tissue over time, from its formation to its mature state [goid 7399] [eviden…		HBEX2; HGR74-h; BEX2	HBEX2; HGR74-h; BEX2	BEX1	5198	structural molecule activity	BEX1	2.43985	1.40479	-1.75279	7e-05	BEX1	2384.34	1895.28	2366.59	3891.92	5276.23	3728.8	2692.23	2699.09	3116.81	1107.42	1747.37	1044.1	1186.21	1584.41
1383755	BFSP1	Homo sapiens beaded filament structural protein 1, filensin (BFSP1), mRNA.	631	NM_001195.2	NP_001186.1	13518027	ILMN_1712608	6660743	S	1794	TGAGGTGCTTGGGACTAGGAGCAGAAGCCTGCCAGAAAAAGGCCCTCCCA	20	-	17422873-17422922						20p12.1a	BFSP1	All of the contents of a cell excluding the plasma membrane and nucleus, but including other subcellular structures [goid 5737] [evidence IEA]; Any of the various filamentous elements that form the internal framework of cells, and typically remain after treatment of the cells with mild detergent to remove membrane constituents and soluble components of the cytoplasm. The term embraces intermediat…	Any process specifically pertinent to the functioning of integrated living units: cells, tissues, organs, and organisms. A process is a collection of molecular events with a defined beginning and end [goid 8150] [evidence ND ]	The action of a molecule that contributes to the structural integrity of a cytoskeletal structure [goid 5200] [pmid 9628810] [evidence TAS]; The action of a molecule that contributes to the structural integrity of the lens of an eye [goid 5212] [evidence NAS]; Interacting selectively with any protein or protein complex (a complex of two or more proteins that may include other nonprotein molecules…	FILENSIN; CP94; CP115; LIFL-H	FILENSIN; CP94; CP115; LIFL-H	BFSP1	0006396; 0005212; 000175; 0005515; 0003723; 0005200; 0005856; 0005882; 0016020	RNA processing; structural constituent of eye lens; 3'-5'-exoribonuclease activity; protein binding; RNA binding; structural constituent of cytoskeleton; cytoskeleton; intermediate filament; membrane	BFSP1	0.06181	0.03077	-2.02731	0.0095	BFSP1	36.5821	29.3171	41.0144	96.3307	169.301	55.9911	77.0834	64.8233	71.3054	45.3961	49.9405	30.3002	19.6467	19.4139
1379715	BGN	Homo sapiens biglycan (BGN), mRNA.	633	NM_001711.3	NP_001702.1	34304351	ILMN_1709139	240341	S	2201	ATCCCGCGCAGATGACACCATCAACCGCCAGAGTCCCAGACACCGGTTTT	X	+	152428019-152428068						Xq28f	BGN	The space external to the outermost structure of a cell. For cells without external protective or external encapsulating structures this refers to space outside of the plasma membrane. This term covers the host cell environment outside an intracellular parasite [goid 5576] [evidence IEA]; A layer consisting mainly of proteins (especially collagen) and glycosaminoglycans (mostly as proteoglycans) …	Any process specifically pertinent to the functioning of integrated living units: cells, tissues, organs, and organisms. A process is a collection of molecular events with a defined beginning and end [goid 8150] [evidence ND ]	Interacting selectively with any protein or protein complex (a complex of two or more proteins that may include other nonprotein molecules) [goid 5515] [evidence IEA]; The action of a molecule that contributes to the structural integrity of the extracellular matrix [goid 5201] [pmid 1860845] [evidence NAS]; Interacting selectively with any protein or protein complex (a complex of two or more prot…	SLRR1A; PG-S1; PGI; DSPG1	SLRR1A; PG-S1; PGI; DSPG1	BGN	0004; 0005201; 0005578	biological process unknown; extracellular matrix structural constituent; extracellular matrix (sensu Metazoa)	BGN	1.0412	2.12216	2.0196	0.00127	BGN	0.38183	817.499	731.054	1481.45	620.791	2001.03	2287.84	2409.77	1293.73	881.418	1523.35	4623.84	2004.63	2231.77
1386429	BHLHB2	Homo sapiens basic helix-loop-helix domain containing, class B, 2 (BHLHB2), mRNA.	8553	NM_003670.1	NP_003661.1	4503298	ILMN_1768534	5810392	S	2510	GGTCCAGAGTACTTGTTTTCCCGATGTGTCCAGCCAGCTCCGCAGCAGCT	3	+	5001452-5001501						3p26.2a	BHLHB2	A membrane-bounded organelle of eukaryotic cells in which chromosomes are housed and replicated. In most cells, the nucleus contains all of the cell's chromosomes except the organellar chromosomes, and is the site of RNA synthesis and processing. In some species, or in specialized cell types, RNA metabolism or DNA replication may be absent [goid 5634] [pmid 9240428] [evidence NAS]	Any process that stops, prevents or reduces the frequency, rate or extent of DNA-dependent transcription [goid 45892] [evidence IEA]	The function of binding to a specific DNA sequence in order to modulate transcription. The transcription factor may or may not also interact selectively with a protein or macromolecular complex [goid 3700] [pmid 9240428] [evidence NAS]; Interacting selectively with any protein or protein complex (a complex of two or more proteins that may include other nonprotein molecules) [goid 5515] [pmid 1127…	DEC1; STRA13; Stra14; SHARP-2	DEC1; STRA13; Stra14; SHARP-2	BHLHB2	0006355; 0003700; 0005634	regulation of transcription DNA-dependent; transcription factor activity; nucleus	BHLHB2	6.39102	3.46142	-1.86336	2.07407e-06	BHLHB2	6890.07	4231.95	8807.52	4238.29	9632.93	7264.85	14238.4	14317.3	8702.67	3933.66	3590.9	2776.28	2828.21	3924.29
1392681	BIN3	Homo sapiens bridging integrator 3 (BIN3), mRNA.	55909	NM_018688.3	NP_061158.1	39725693	ILMN_1708485	7550392	S	1512	TTGTGCTGTAACTTAGGCGAGCAGAGGAAACCCCTTCCTGGGCCTGCTGC	8	-	22534111-22534160						8p21.3a	BIN3	All of the contents of a cell excluding the plasma membrane and nucleus, but including other subcellular structures [goid 5737] [evidence IEA]; Any of the various filamentous elements that form the internal framework of cells, and typically remain after treatment of the cells with mild detergent to remove membrane constituents and soluble components of the cytoplasm. The term embraces intermediat…	A cellular process resulting in the division of the cytoplasm of a cell and its separation into two daughter cells. Cytokinesis usually occurs after growth, replication, and segregation of cellular components [goid 910] [pmid 11274158] [evidence NAS]; The process of making a septum that spans the plasma membrane interface between progeny cells following cytokinesis. The progeny cells that form a …	Interacting selectively with any protein or protein complex (a complex of two or more proteins that may include other nonprotein molecules) [goid 5515] [evidence IEA]; The binding activity of a molecule that brings together a cytoskeletal molecule and one or more other molecules, permitting them to function in a coordinated way [goid 8093] [pmid 11274158] [evidence NAS]		MGC14978	BIN3	000917; 0007049; 0008104; 0007015; 0009826; 0005515; 0008093; 0005856; 0005737	barrier septum formation; cell cycle; protein localization; actin filament organization; unidimensional cell growth; protein binding; cytoskeletal adaptor activity; cytoskeleton; cytoplasm	BIN3	0.15557	0.24164	1.53908	0.00012	BIN3	217.425	278.925	195.166	141.23	122.296	207.364	194.805	165.23	190.305	48.6771	212.615	417.918	410.647	375.763
1393045	BM88	Homo sapiens BM88 antigen (BM88), mRNA.	51286	NM_016564.2	NP_057648.2	30795224	ILMN_1720482	2340113	S	1326	ACTGCCCCTCCAGCTTGCACCCAGCACCACCTGAGTCTAACCAGCGTATA	11	-	777377-777426						11p15.5c	BM88				MGC34326	FLJ90066; MGC34326; BM88	BM88	16021	integral to membrane	BM88	2.36253	1.44937	-1.64505	0.00346	BM88	2711.98	2001.28	1382.75	4734.04	4198.19	3992.57	2365.16	2565.19	2993.9	1178.1	1107.13	1175.95	1175.63	2403.49
1395758	BNC2	Homo sapiens basonuclin 2 (BNC2), mRNA.	54796	NM_017637.4	NP_060107.2	50301241	ILMN_1656373	3310639	S	5412	TGTCTAGGAGCTTTATCTTTTCACCTCCTTCAGAGGATGCTATGGGGTCC	9	-	16406696-16406745						9p22.3a-p22.2b	BNC2	The living contents of a cell; the matter contained within (but not including) the plasma membrane, usually taken to exclude large vacuoles and masses of secretory or ingested material. In eukaryotes it includes the nucleus and cytoplasm [goid 5622] [evidence IEA]; A membrane-bounded organelle of eukaryotic cells in which chromosomes are housed and replicated. In most cells, the nucleus contains …	The synthesis of either RNA on a template of DNA or DNA on a template of RNA [goid 6350] [evidence IEA]; Any process that modulates the frequency, rate or extent of DNA-dependent transcription [goid 6355] [evidence IEA]	Interacting selectively with DNA (deoxyribonucleic acid) [goid 3677] [evidence IEA]; Interacting selectively with zinc (Zn) ions [goid 8270] [evidence IEA]; Interacting selectively with any metal ion [goid 46872] [evidence IEA]; Interacting selectively with zinc (Zn) ions [goid 8270] [evidence IEA]; Interacting selectively with zinc (Zn) ions [goid 8270] [evidence IEA]; Interacting selectively wi…	DKFZp686A01127; FLJ34928; FLJ20043; BSN2	DKFZp686A01127; FLJ34928; FLJ20043; BSN2	BNC2	0046872; 0003676; 0008270; 0005634	metal ion binding; nucleic acid binding; zinc ion binding; nucleus	BNC2	0.26795	0.15881	-1.70271	1.79098e-06	BNC2	390.832	286.325	263.148	222.591	451.606	304.854	339.434	297.297	319.511	73.0093	166.572	157.439	206.743	111.982
1390431	BNIPL	Homo sapiens BCL2/adenovirus E1B 19kD interacting protein like (BNIPL), transcript variant 1, mRNA.	149428	NM_138278.1	NP_612122.1	19923079	ILMN_1699989	3180187	I	2216	GCCCTTTTTCCTTCTAAGTCATGTCTGCTGCCTGTGAGCCTGGGAAGGAG	1	+	149286567-149286616						1q21.2d	BNIPL	A membrane-bounded organelle of eukaryotic cells in which chromosomes are housed and replicated. In most cells, the nucleus contains all of the cell's chromosomes except the organellar chromosomes, and is the site of RNA synthesis and processing. In some species, or in specialized cell types, RNA metabolism or DNA replication may be absent [goid 5634] [pmid 11741952] [evidence IDA]; That part of …	A form of programmed cell death induced by external or internal signals that trigger the activity of proteolytic caspases, whose actions dismantle the cell and result in cell death. Apoptosis begins internally with condensation and subsequent fragmentation of the cell nucleus (blebbing) while the plasma membrane remains intact. Other characteristics of apoptosis include DNA fragmentation and the …	Interacting selectively with an identical protein or proteins [goid 42802] [pmid 12901880] [evidence IPI]	BNIPL-2; BNIP-S; BNIPL-1; BNIPL1; BNIPL2; PP753	BNIPL-2; BNIP-S; BNIPL-1; BNIPL1; BNIPL2; PP753	BNIPL	0006915; 0008285; 0040009; 0042802; 0005829; 0005634	apoptosis; negative regulation of cell proliferation; regulation of growth rate; protein self binding; cytosol; nucleus	BNIPL	0.04394	0.13945	3.14428	0.00045	BNIPL	89.3722	111.586	24.7064	32.6769	30.7732	14.7418	57.7035	45.7951	50.9194	33.7342	53.8355	172.414	505.889	164.132
1389498	BOK	Homo sapiens BCL2-related ovarian killer (BOK), mRNA.	666	NM_032515.3	NP_115904.1	34335395	ILMN_1730032	7380678	S	2260	CCCCTCAGGTGCCCCCACACACAGCCTTCCCTTGACGCCTACATTTCTAG	2	+	242161885-242161934						2q37.3g	BOK	The part of a cell or its extracellular environment in which a gene product is located. A gene product may be located in one or more parts of a cell and its location may be as specific as a particular macromolecular complex, that is, a stable, persistent association of macromolecules that function together [goid 5575] [evidence ND ]	A process that directly activates any of the steps required for cell death by apoptosis [goid 6917] [evidence IEA]; Any process that modulates the occurrence or rate of cell death by apoptosis [goid 42981] [evidence IEA]; A process that directly activates any of the steps required for cell death by apoptosis [goid 6917] [pmid 9356461] [evidence TAS]; Any process that modulates the occurrence or r…	The formation of a protein dimer, a macromolecular structure consists of two noncovalently associated identical or nonidentical subunits [goid 46983] [evidence ISS]	MGC4631; BOKL; BCL2L9	MGC4631; BOKL; BCL2L9	BOK	0006917; 0042981; 0046983; 0008372	induction of apoptosis; regulation of apoptosis; protein dimerization activity; cellular component unknown	BOK	0.98361	2.00208	2.01688	2e-05	BOK	1345.14	1989.72	1137.88	1376.56	423.212	825.414	1186.29	1267.83	1194.01	451.66	2223.05	4616.13	3215.82	2127.84
1378146	BRPF3	Homo sapiens bromodomain and PHD finger containing, 3 (BRPF3), mRNA.	27154	NM_015695.1	NP_056510.1	55742814	ILMN_1658800	6760017	S	5749	ATGCTCTTTTAGAACGGGAAACGGCTCAGATCCTGCTGTGGCACGGGGCC	6	+	36308271-36308320						6p21.31a	BRPF3			Interacting selectively with any protein or protein complex (a complex of two or more proteins that may include other nonprotein molecules) [goid 5515] [evidence IEA]; Interacting selectively with zinc (Zn) ions [goid 8270] [evidence IEA]; Interacting selectively with any metal ion [goid 46872] [evidence IEA]; Interacting selectively with any protein or protein complex (a complex of two or more p…			BRPF3	0006355; 0046872; 0008270; 0005515	regulation of transcription DNA-dependent; metal ion binding; zinc ion binding; protein binding	BRPF3	0.82286	1.37368	1.65418	2.61817e-09	BRPF3	1373.79	1224.72	1115.48	841.55	786.885	902.183	863.203	917.565	1003.17	210.129	1381.43	1965.21	2440.89	1469.68
1383022	BRWD1	Homo sapiens bromodomain and WD repeat domain containing 1 (BRWD1), transcript variant 3, mRNA.	54014	NM_001007246.1	NP_001007247.1	55956929	ILMN_1805111	6860491	A	294	TGGACTGGGAGGGCAACGAGCACAACAGGAGCTACGAGGAGTTGGTCTTG	21	-	39592372-39592378:39606637-39606679	2630692	I	2194	TGCTGTGGATCTCTTTAAAGGTCCTGGAACCTTTGAGCCTCAGTTACCTC	39590472-39590521	21q22.2a-q22.2b	BRWD1	A membrane-bounded organelle of eukaryotic cells in which chromosomes are housed and replicated. In most cells, the nucleus contains all of the cell's chromosomes except the organellar chromosomes, and is the site of RNA synthesis and processing. In some species, or in specialized cell types, RNA metabolism or DNA replication may be absent [goid 5634] [pmid 16780588] [evidence IDA]; All of the co…	The synthesis of either RNA on a template of DNA or DNA on a template of RNA [goid 6350] [evidence IEA]; Any process that modulates the frequency, rate or extent of transcription from an RNA polymerase II promoter [goid 6357] [evidence IEA]; Any process specifically pertinent to the functioning of integrated living units: cells, tissues, organs, and organisms. A process is a collection of molecul…	Interacting selectively with any protein or protein complex (a complex of two or more proteins that may include other nonprotein molecules) [goid 5515] [evidence IEA]; Plays a role in regulating transcription; may bind a promoter or enhancer DNA sequence or interact with a DNA-binding transcription factor [goid 30528] [evidence IEA]	C21orf107; FLJ43918; WDR9; N143	C21orf107; FLJ43918; WDR9; N143	BRWD1	0004; 0005554; 0008372	biological process unknown; molecular function unknown; cellular component unknown	BRWD1	2.69176	1.47414	-1.8428	0.00018	BRWD1	2869.97	2052.72	2499.86	4406.8	6102.21	3499.25	3047.52	3130.7	3451.13	1276.58	1946.53	1006.54	992.544	1583.86
1389103	BSCL2	Homo sapiens Bernardinelli-Seip congenital lipodystrophy 2 (seipin) (BSCL2), mRNA.	26580	NM_032667.4	NP_116056.3	40068504	ILMN_1774596	2370370	S	1537	CCTGAAGAAAAGGGGCAGACTCCTCACATTCCAGCACTTTCCCACCTGAC	11	-	62214369-62214414:62214415-62214418						11q12.3a	BSCL2	The irregular network of unit membranes, visible only by electron microscopy, that occurs in the cytoplasm of many eukaryotic cells. The membranes form a complex meshwork of tubular channels, which are often expanded into slitlike cavities called cisternae. The ER takes two forms, rough (or granular), with ribosomes adhering to the outer surface, and smooth (with no ribosomes attached) [goid 5783…	Any process specifically pertinent to the functioning of integrated living units: cells, tissues, organs, and organisms. A process is a collection of molecular events with a defined beginning and end [goid 8150] [evidence ND ]	Elemental activities, such as catalysis or binding, describing the actions of a gene product at the molecular level. A given gene product may exhibit one or more molecular functions [goid 3674] [evidence ND ]	SPG17; MGC4694; HMN5; GNG3LG	SPG17; MGC4694; HMN5; GNG3LG	BSCL2	0004; 0005554; 0030176; 0005783; 0016021	biological process unknown; molecular function unknown; integral to endoplasmic reticulum membrane; endoplasmic reticulum; integral to membrane	BSCL2	10.6006	7.10923	-1.50484	0.00189	BSCL2	8823.38	9585.74	10742.4	14807.7	20983.5	17011.9	14471.9	14699.8	13890.8	4070.9	5326.34	5875.39	6245.8	9967.21
1387356	BSN	Homo sapiens bassoon (presynaptic cytomatrix protein) (BSN), mRNA.	8927	NM_003458.1	NP_003449.1	4508018	ILMN_1760246	2650446	S	15846	GCTGTCCTTCTGTGCTCTGTGAGAACTCGTGGTACTTCAGTGTCCCTCCC	3	+	49683873-49683922						3p21.31d-p21.31c	BSN	A membrane-bounded organelle of eukaryotic cells in which chromosomes are housed and replicated. In most cells, the nucleus contains all of the cell's chromosomes except the organellar chromosomes, and is the site of RNA synthesis and processing. In some species, or in specialized cell types, RNA metabolism or DNA replication may be absent [goid 5634] [pmid 9806829] [evidence TAS]; All of the con…	The process of communication from a neuron to a target (neuron, muscle, or secretory cell) across a synapse [goid 7268] [pmid 10329005] [evidence TAS]	Interacting selectively with zinc (Zn) ions [goid 8270] [evidence IEA]; Interacting selectively with any metal ion [goid 46872] [evidence IEA]	ZNF231	ZNF231	BSN	0007268; 0046872; 0005200; 0019717; 0005856; 0045202; 0005634	synaptic transmission; metal ion binding; structural constituent of cytoskeleton; synaptosome; cytoskeleton; synapse; nucleus	BSN	3.26754	2.09124	-1.57687	0.00889	BSN	3154.18	3435.29	2396.92	4812.27	6136.96	5094.21	4047.5	4585.21	4207.82	1196.85	1385.47	1869.82	765.301	4733.37
1380554	BTBD11	Homo sapiens BTB (POZ) domain containing 11 (BTBD11), transcript variant 1, mRNA.	121551	NM_152322.2	NP_689535.2	65786574	ILMN_1705066	3450280	A	2536	CTGTCACCTTCCTCCTCCCACTTCTGTATCCTCAGAGATGCTGCGTGGAT	12	+	106577350-106577399	7510253	I	8	GTCTCGTTAATGGAGAACACAGTCACAGGATCAAAAGGGCTAATTTCAGG	106552746-106552795	12q23.3d	BTBD11	Double layer of lipid molecules that encloses all cells, and, in eukaryotes, many organelles; may be a single or double lipid bilayer; also includes associated proteins [goid 16020] [evidence IEA]; Penetrating at least one phospholipid bilayer of a membrane. May also refer to the state of being buried in the bilayer with no exposure outside the bilayer. When used to describe a protein, indicates …		Interacting selectively with DNA (deoxyribonucleic acid) [goid 3677] [evidence IEA]; Interacting selectively with any protein or protein complex (a complex of two or more proteins that may include other nonprotein molecules) [goid 5515] [evidence IEA]	FLJ42845; FLJ33957	FLJ42845; FLJ33957	BTBD11	5515	protein binding	BTBD11	1.34705	0.70683	-1.92332	0.00035	BTBD11	1489.95	1098.33	873.478	1831.89	2503.34	2356.02	1709.96	1512.6	1671.95	562.05	591.187	280.685	267.849	1247.65
1397001	BTBD14A	Homo sapiens BTB (POZ) domain containing 14A (BTBD14A), mRNA.	138151	NM_144653.3	NP_653254.1	42716306	ILMN_1809522	3840273	S	1930	GGTGGCTGCGCGAGGGACCGAGTACTAGAGCTGCTTGCATGCGTTACTAA	9	-	138043123-138043172						9q34.3c	BTBD14A			Interacting selectively with any protein or protein complex (a complex of two or more proteins that may include other nonprotein molecules) [goid 5515] [evidence IEA]	BTBD14; MGC23427	BTBD14; MGC23427	BTBD14A	5515	protein binding	BTBD14A	0.30414	0.51737	1.68557	0.00198	BTBD14A	307.859	363.025	405.593	203.352	278.728	376.675	468.018	510.703	364.244	100.331	308.976	993.045	1345.33	585.22
1377127	BTG2	Homo sapiens BTG family, member 2 (BTG2), mRNA.	7832	NM_006763.2	NP_006754.1	28872718	ILMN_1770085	110390	S	2218	CCAAACACTCTCCCTACCCATTCCTGCCAGCTCTGCCTCCTTTTCAACTC	1	+	201544859-201544908						1q32.1e	BTG2	A membrane-bounded organelle of eukaryotic cells in which chromosomes are housed and replicated. In most cells, the nucleus contains all of the cell's chromosomes except the organellar chromosomes, and is the site of RNA synthesis and processing. In some species, or in specialized cell types, RNA metabolism or DNA replication may be absent [goid 5634] [pmid 18029348] [evidence IDA]	The process of restoring DNA after damage. Genomes are subject to damage by chemical and physical agents in the environment (e.g. UV and ionizing radiations, chemical mutagens, fungal and bacterial toxins, etc.) and by free radicals or alkylating agents endogenously generated in metabolism. DNA is also damaged because of errors during its replication. A variety of different DNA repair pathways ha…	Interacting selectively with any protein or protein complex (a complex of two or more proteins that may include other nonprotein molecules) [goid 5515] [pmid 17353931] [evidence IPI]	PC3; TIS21; MGC126064; MGC126063	PC3; TIS21; MGC126064; MGC126063	BTG2	0006355; 0008285; 0006350; 0006281; 0003700	regulation of transcription DNA-dependent; negative regulation of cell proliferation; transcription; DNA repair; transcription factor activity	BTG2	0.95954	0.45197	-2.14255	0.00063	BTG2	552.639	448.413	2785.43	821.005	922.161	1310.73	1306.3	1345.43	1186.51	733.06	529.888	587.278	418.956	360.313
1390816	BTNL9	Homo sapiens butyrophilin-like 9 (BTNL9), mRNA.	153579	NM_152547.2	NP_689760.2	60460896	ILMN_1772976	50612	S	3024	GAGCCGCTGTGCCTGGCTTCATTTTCAGAGTGAGACATTTGTACTGTGGC	5	+	180420676-180420725						5q35.3g	BTNL9	Double layer of lipid molecules that encloses all cells, and, in eukaryotes, many organelles; may be a single or double lipid bilayer; also includes associated proteins [goid 16020] [evidence IEA]; Penetrating at least one phospholipid bilayer of a membrane. May also refer to the state of being buried in the bilayer with no exposure outside the bilayer. When used to describe a protein, indicates …			VDLS1900; BTN3	VDLS1900; BTN3	BTNL9	16021	integral to membrane	BTNL9	0.1034	0.21439	2.05454	0.00044	BTNL9	98.8775	272.925	8.97655	174.493	38.6853	174.803	115.306	128.885	126.619	83.2328	308.192	291.291	383.729	397.668
1396191	BZRAP1	Homo sapiens benzodiazapine receptor (peripheral) associated protein 1 (BZRAP1), mRNA.	9256	NM_004758.1	NP_004749.1	4758955	ILMN_1680113	2120709	S	6662	GGCCAGCGGGGCCGAAAGCGGAGTTGGGTTTGCTTATTTTGCTCATTGGA	17	-	53733899-53733948						17q22d	BZRAP1	All of the contents of a cell excluding the plasma membrane and nucleus, but including other subcellular structures [goid 5737] [pmid 9915832] [evidence IDA]; A semiautonomous, self replicating organelle that occurs in varying numbers, shapes, and sizes in the cytoplasm of virtually all eukaryotic cells. It is notably the site of tissue respiration [goid 5739] [pmid 9915832] [evidence IDA]	Any process specifically pertinent to the functioning of integrated living units: cells, tissues, organs, and organisms. A process is a collection of molecular events with a defined beginning and end [goid 8150] [evidence ND ]	Interacting selectively with the peripheral benzodiazepine receptor (PBR) [goid 30156] [pmid 9915832] [evidence IPI]	RIMBP1; RIM-BP1; KIAA0612; PRAX-1; PRAX1	RIMBP1; RIM-BP1; KIAA0612; PRAX-1; PRAX1	BZRAP1	0004; 0030156; 0005739	biological process unknown; benzodiazepine receptor binding; mitochondrion	BZRAP1	0.57797	0.3884	-1.50179	5e-05	BZRAP1	954.357	728.597	481.799	710.496	629.56	882.802	597.465	609.495	699.321	155.984	333.804	312.349	301.658	692.287
1378609	C10orf104	Homo sapiens chromosome 10 open reading frame 104 (C10orf104), mRNA.	119504	NM_173473.2	NP_775744.1	50234894	ILMN_1738955	3190470	S	3019	GCAATCACTACCTTTCTCGTTTCATTTGTGTAACCATGCAGCATAGGCAC	10	+	73665448-73665497						10q22.1e-q22.1f	C10orf104				FLJ33728; bA570G20.3	FLJ33728; bA570G20.3	C10orf104	0006355; 0006350; 0046872; 0008270; 0003677; 0005634	regulation of transcription DNA-dependent; transcription; metal ion binding; zinc ion binding; DNA binding; nucleus	C10orf104	0.75502	1.15615	1.51732	0.00142	C10orf104	1113.26	1520.21	1034.68	589.305	364.139	698.275	993.706	1009.18	915.344	356.865	1386.38	1466.4	1821.07	1454.72
1379666	C10orf33	Homo sapiens chromosome 10 open reading frame 33 (C10orf33), mRNA.	84795	NM_032709.1	NP_116098.1	14249307	ILMN_1684497	3390192	S	1785	AGAGCATGTGACCCTGAACCAGCTCTGACCCAGGAAGAAGACTCCACCCC	10	-	100133505-100133544:100133545-100133554						10q24.2a	C10orf33		The process of removal or addition of one or more electrons with or without the concomitant removal or addition of a proton or protons [goid 55114] [evidence IEA]	Catalysis of an oxidation-reduction (redox) reaction, a reversible chemical reaction in which the oxidation state of an atom or atoms within a molecule is altered. One substrate acts as a hydrogen or electron donor and becomes oxidized, while the other acts as hydrogen or electron acceptor and becomes reduced [goid 16491] [evidence IEA]	FLJ23849; MGC13047	FLJ23849; MGC13047	C10orf33	0006118; 0016117; 0050660; 0016705	electron transport; carotenoid biosynthesis; FAD binding; oxidoreductase activity acting on paired donors with incorporation or reduction of molecular oxygen	C10orf33	0.30625	0.4955	1.6032	0.00112	C10orf33	509.035	471.577	254.123	258.949	142.289	291.172	516.89	503.303	368.417	147.745	564.977	514.116	928.128	637.737
1394824	C10orf35	Homo sapiens chromosome 10 open reading frame 35 (C10orf35), mRNA.	219738	NM_145306.1	NP_660349.1	21687152	ILMN_1662470	430286	S	853	ACATGTTCCGATGCCTGTGGAAGACATGCCGACGTCTCCTCTGCCTAGGG	10	+	71063149-71063198						10q21.3e	C10orf35	Double layer of lipid molecules that encloses all cells, and, in eukaryotes, many organelles; may be a single or double lipid bilayer; also includes associated proteins [goid 16020] [evidence IEA]; Penetrating at least one phospholipid bilayer of a membrane. May also refer to the state of being buried in the bilayer with no exposure outside the bilayer. When used to describe a protein, indicates …		Interacting selectively with any protein or protein complex (a complex of two or more proteins that may include other nonprotein molecules) [goid 5515] [evidence IEA]; Interacting selectively with any protein or protein complex (a complex of two or more proteins that may include other nonprotein molecules) [goid 5515] [evidence IEA]			C10orf35	0016020; 0016021	membrane; integral to membrane	C10orf35	2.36334	1.32181	-1.80442	0.00074	C10orf35	2368.9	2096.85	1370.06	3540.78	5656.68	4056.71	2504.21	2488.31	3010.31	1354.59	1191.28	912.686	1095.24	1988.25
1386547	C10orf39	Homo sapiens chromosome 10 open reading frame 39 (C10orf39), mRNA.	282973	NM_194303.1	NP_919279.1	34916035	ILMN_1753490	2760187	S	4800	CCCAGGCACTCCCTTCATAGTCACCCTCTAACCACATGACATTCCGTTCC	10	+	133848096-133848145						10q26.3e	C10orf39				FLJ37857	FLJ37857	C10orf39	0006952; 0042981; 0006916; 0043123; 0006508; 0007250; 0008233; 0004871; 0005515; 0030693; 0005622	defense response; regulation of apoptosis; anti-apoptosis; positive regulation of I-kappaB kinase/NF-kappaB cascade; proteolysis and peptidolysis; activation of NF-kappaB-inducing kinase; peptidase activity; signal transducer activity; protein binding; caspase activity; intracellular	C10orf39	1.15334	2.59057	2.22565	3.10175e-06	C10orf39	2122.19	1941.46	1412.38	1486.05	852.45	1479.4	960.321	991.555	1405.73	461.099	2846.04	7124.28	3436.67	2573.17
1387882	C10orf83	Homo sapiens chromosome 10 open reading frame 83 (C10orf83), mRNA.	118812	NM_178832.2	NP_849154.1	31341691	ILMN_1788878	20100	S	2008	TTGGACCTACTCTAGGACTGTGGGGAACTAAAGGAGCATTTGGCTCACTG	10	-	99364557-99364606						10q24.1b	C10orf83				bA548K23.4; FLJ25925; RP11-548K23.4	bA548K23.4; FLJ25925; RP11-548K23.4	C10orf83	0007264; 000166; 0003924; 0005525; 0016020	small GTPase mediated signal transduction; nucleotide binding; GTPase activity; GTP binding; membrane	C10orf83	0.90334	0.54802	-1.66356	0.00061	C10orf83	1345.02	977.686	534.031	1380.01	1775.43	1212.57	793.216	846.074	1108	396.536	525.315	449.852	436.898	774.74
1389898	C11orf61	Homo sapiens chromosome 11 open reading frame 61 (C11orf61), mRNA.	79684	NM_024631.1	NP_078907.1	13375859	ILMN_1773148	6220541	S	1402	CTCAGAACTGTATTGTGGATCCCGGAGTTTCCCCCAAATCCATCTACATC	11	-	124142377-124142426						11q24.2a	C11orf61				FLJ23342	FLJ23342	FLJ23342	0007165; 0007186; 0001584; 0004872; 0016021	signal transduction; G-protein coupled receptor protein signaling pathway; rhodopsin-like receptor activity; receptor activity; integral to membrane	C11orf61	0.14729	0.23046	1.55041	0.00548	C11orf61	277.274	375.701	161.079	155.563	152.202	110.711	96.3589	131.214	182.513	95.3306	352.936	202.713	329.234	237.327
1377005	C11orf63	Homo sapiens chromosome 11 open reading frame 63 (C11orf63), transcript variant 1, mRNA.	79864	NM_024806.2	NP_079082.2	40217798	ILMN_1680659	2350445	I	2425	CCTCGGCAGAAGGCTTTGGAATACGCTAAGACCATCCCCAAACCCAAACC	11	+	122333398-122333409:122335166-122335203						11q24.1b	C11orf63				FLJ23554	FLJ23554	FLJ23554	0006941; 0007517; 0008307; 0005863	striated muscle contraction; muscle development; structural constituent of muscle; striated muscle thick filament	C11orf63	0.51534	0.32486	-1.60096	0.00016	C11orf63	609.523	627.726	316.162	499.707	484.655	825.798	802.18	801.663	620.927	182.762	398.337	367.681	507.252	484.99
1383844	C11orf69	Homo sapiens chromosome 11 open reading frame 69 (C11orf69), mRNA.	120196	NM_152314.1	NP_689527.1	22748688	ILMN_1653836	4220452	S	1572	GAACTTTGTACGTCCTTAGCCTCTGCCGGGAACAGAGTGTTCATATGCTG	11	+	33652124-33652173						11p13d	C11orf69				MGC34830	FLJ36988; MGC34830; G2; C11orf69	MGC34830	0006355; 0006350; 0046872; 0003676; 0008270; 0005515; 0003677; 005634	regulation of transcription DNA-dependent; transcription; metal ion binding; nucleic acid binding; zinc ion binding; protein binding; DNA binding; nucleus	C11orf69	1.53746	0.94354	-1.64445	0.00014	C11orf69	2338.03	1376.78	1394.25	1913.74	1920.82	2749.76	1636.85	1860.53	1898.84	465.209	772.52	1039.22	436.178	1856.32
1393036	C11orf80	Homo sapiens chromosome 11 open reading frame 80 (C11orf80), mRNA.	79703	NM_024650.2	NP_078926.2	31542734	ILMN_1790637	1300450	I	2086	CGGGCAGCCGTTATCCCGTGGTTTAATAAAGCTGCCGCGCGCTCACCAAG	11	+	66367326-66367375						11q13.1e	C11orf80				FLJ22531	FLJ22531	FLJ22531	0018149; 0008360; 0043249; 0003824; 0005524; 0005200; 0005856; 0005886	peptide cross-linking; regulation of cell shape; erythrocyte maturation; catalytic activity; ATP binding; structural constituent of cytoskeleton; cytoskeleton; plasma membrane	C11orf80	0.30456	0.16263	-1.88987	0.00492	C11orf80	352.434	223.194	182.405	401.664	764.185	478.876	283.431	234.332	365.065	189.358	89.7635	192.643	99.5615	223.177
1387584	C11orf9	Homo sapiens chromosome 11 open reading frame 9 (C11orf9), transcript variant 1, mRNA.	745	NM_013279.1	NP_037411.1	7019334	ILMN_1811437	650465	S	5476	CAAGCTGTACATAGGGCCTCCCAGTGCAAATCCTCCTGCCCATACCGTGC	11	+	61312296-61312345						11q12.2b	C11orf9	A membrane-bounded organelle of eukaryotic cells in which chromosomes are housed and replicated. In most cells, the nucleus contains all of the cell's chromosomes except the organellar chromosomes, and is the site of RNA synthesis and processing. In some species, or in specialized cell types, RNA metabolism or DNA replication may be absent [goid 5634] [evidence IEA]; Double layer of lipid molecul…	Any process that modulates the frequency, rate or extent of the synthesis of either RNA on a template of DNA or DNA on a template of RNA [goid 45449] [evidence IEA]	The function of binding to a specific DNA sequence in order to modulate transcription. The transcription factor may or may not also interact selectively with a protein or macromolecular complex [goid 3700] [evidence IEA]	MGC10781; KIAA0954	MGC10781; KIAA0954	C11orf9	0006955; 0016567; 0004842; 0046872; 0008270; 0003924; 0005525; 00151	immune response; protein ubiquitination; ubiquitin-protein ligase activity; metal ion binding; zinc ion binding; GTPase activity; GTP binding; ubiquitin ligase complex	C11orf9	0.58374	0.9239	1.56829	0.00102	C11orf9	806.113	703.149	1106.24	1096.59	420.321	649.678	476.864	422.771	710.215	277.784	1390.56	1929.45	1181.77	861.928
1382208	C12orf10	Homo sapiens chromosome 12 open reading frame 10 (C12orf10), mRNA.	60314	NM_021640.2	NP_067653.2	56676384	ILMN_1777765	5960424	S	1126	CCGTGCCACCTTGGCCCAGCGCTCATACCTCCCACAAATCTCCTAGTCTA	12	+	51987155-51987200:51987201-51987204						12q13.13e	C12orf10	The part of a cell or its extracellular environment in which a gene product is located. A gene product may be located in one or more parts of a cell and its location may be as specific as a particular macromolecular complex, that is, a stable, persistent association of macromolecules that function together [goid 5575] [evidence ND ]	The deposition or aggregation of coloring matter in an organism, tissue or cell [goid 43473] [pmid 16996721] [evidence NAS]	Elemental activities, such as catalysis or binding, describing the actions of a gene product at the molecular level. A given gene product may exhibit one or more molecular functions [goid 3674] [evidence ND ]	MYG; MST024; MSTP024; MYG1	MYG; MST024; MSTP024; MYG1	C12orf10	0006511; 0006512; 0004197; 0008233; 0003676; 0004221; 0005764	ubiquitin-dependent protein catabolism; ubiquitin cycle; cysteine-type endopeptidase activity; peptidase activity; nucleic acid binding; ubiquitin thiolesterase activity; lysosome	C12orf10	3.29945	2.12166	-1.56944	0.00034	C12orf10	3019.14	2735.24	3431.78	4925.92	6539.42	4748.49	4496.05	4264.92	4270.12	1223.77	1743.87	2161.53	1771.27	2639.62
1383403	C12orf53	Homo sapiens chromosome 12 open reading frame 53 (C12orf53), mRNA.	196500	NM_153685.2	NP_710152.1	31559779	ILMN_1706186	5720328	S	1861	AGTCAGCTGGTTCAAGGCCATCGGGAGCTCTGCCTCCAAGTCTACCCTTC	12	-	6673477-6673526						12p13.31d	C12orf53	Double layer of lipid molecules that encloses all cells, and, in eukaryotes, many organelles; may be a single or double lipid bilayer; also includes associated proteins [goid 16020] [evidence IEA]; Penetrating at least one phospholipid bilayer of a membrane. May also refer to the state of being buried in the bilayer with no exposure outside the bilayer. When used to describe a protein, indicates …			DKFZp547D2210	DKFZp547D2210	C12orf53	0006457; 0006986; 0004867; 0005518; 0051082; 0005783; 0005793	protein folding; response to unfolded protein; serine-type endopeptidase inhibitor activity; collagen binding; unfolded protein binding; endoplasmic reticulum; ER-Golgi intermediate compartment	C12orf53	0.63146	0.34187	-1.86406	0.00062	C12orf53	566.21	823.957	485.714	779.382	887.291	1352.95	620.353	644.778	770.08	271.77	205.781	250.758	75.2605	596.587
1384665	C12orf54	Homo sapiens chromosome 12 open reading frame 54 (C12orf54), mRNA.	121273	NM_152319.2	NP_689532.1	34303924	ILMN_1675616	2510523	S	516	CATCACTGAACCCAGAAGAGAGGGTGGTGCCCATGAGTGGAGATGCCAGG	12	+	47176265-47176314						12q13.11c	C12orf54				MGC35033; HSD-30; HSD-29	MGC35033; HSD-30; HSD-29	C12orf54	0007565; 0007169; 0001525; 0008284; 0006468; 0030154; 000166; 0004872; 0016740; 0005524; 0005021; 0005615; 0016020; 0005887	pregnancy; transmembrane receptor protein tyrosine kinase signaling pathway; angiogenesis; positive regulation of cell proliferation; protein amino acid phosphorylation; cell differentiation; nucleotide binding; receptor activity; transferase activity; ATP binding; vascular endothelial growth factor receptor activity; extracellular space; membrane; integral to plasma membrane	C12orf54	0.13891	0.07656	-1.83117	6.7253e-06	C12orf54	128.498	128.492	183.674	134.445	257.312	180.867	146.66	172.388	166.542	43.248	87.3459	96.79	51.4644	79.2662
1395221	C12orf59	Homo sapiens chromosome 12 open reading frame 59 (C12orf59), mRNA.	120939	NM_153022.1	NP_694567.1	23308506	ILMN_1674184	2470446	S	2562	TCCTACTGTCTTCTAACCTTCCCTTGCCTGCTATGACTTATCTGAGAGCC	12	+	10235517-10235566						12p13.2c	C12orf59	Double layer of lipid molecules that encloses all cells, and, in eukaryotes, many organelles; may be a single or double lipid bilayer; also includes associated proteins [goid 16020] [evidence IEA]; Penetrating at least one phospholipid bilayer of a membrane. May also refer to the state of being buried in the bilayer with no exposure outside the bilayer. When used to describe a protein, indicates …			MGC111385; FLJ31166	MGC111385; FLJ31166	C12orf59	0004; 0005554; 0008372	biological process unknown; molecular function unknown; cellular component unknown	C12orf59	0.18889	0.41468	2.17532	0.00015	C12orf59	203.305	224.622	444.033	269.467	181.746	104.07	185.065	214.16	228.309	98.9542	1030.61	230.137	292.587	225.049
1394618	C14orf173	Homo sapiens chromosome 14 open reading frame 173 (C14orf173), transcript variant 2, mRNA.	64423	NM_022489.1	NP_071934.1	11968044	ILMN_1727248	650717	A	2406	CTTTGCTGCCACTGCCAGGCCTCTGCCCTGCAGCTGAAACTTGGCCATCA	14	+	104256725-104256774	3120170	I	1	TCCTCGATGCCTAGAAGAGCCTGAACCTCAACATCTTCCTGAAGCAATTT	104246060-104246109	14q32.33b	C14orf173				DKFZp762A0214; FLJ22056; pp9484	DKFZp762A0214; FLJ22056; INF2; MGC13251; C14orf151; C14orf173; pp9484	C14orf173	0016043; 0003779	cell organization and biogenesis; actin binding	C14orf173	0.35036	0.67611	1.91215	4.42092e-06	C14orf173	681.7	588.227	383.342	422.815	172.267	486.545	326.381	326.572	423.481	160.951	1024.07	1514.58	820.302	730.832
1382186	C14orf2	Homo sapiens chromosome 14 open reading frame 2 (C14orf2), mRNA.	9556	NM_004894.1	NP_004885.1	4758939	ILMN_1652722	240523	S	398	GTACTGCTTTCAGTGTGTTCCCCCTCAGCCCCTCCGGCGTGTCAGGCATA	14	-	103448545-103448594						14q32.33a	C14orf2				PLPM; MP68	PLPM; MP68	C14orf2	0004; 0005554; 0008372	biological process unknown; molecular function unknown; cellular component unknown	C14orf2	3.18603	2.08595	-1.54143	0.00018	C14orf2	3777.99	2575.71	2508.68	5457.13	5112.54	3812.98	5154.16	4700.59	4137.47	1156.94	1911.93	1683.06	2136.56	3082.63
1381467	C14orf37	Homo sapiens chromosome 14 open reading frame 37 (C14orf37), mRNA.	145407	NM_001001872.2	NP_001001872.2	56711319	ILMN_1796377	6130095	S	2529	GCTGCTATCAGGCCGTTAGTCCTAGTGTCTGCTGGGTGCTGGGTAGTAGA	14	-	57541064-57541113						14q23.1a-q23.1b	C14orf37	Double layer of lipid molecules that encloses all cells, and, in eukaryotes, many organelles; may be a single or double lipid bilayer; also includes associated proteins [goid 16020] [evidence IEA]; Penetrating at least one phospholipid bilayer of a membrane. May also refer to the state of being buried in the bilayer with no exposure outside the bilayer. When used to describe a protein, indicates …			c14_5376	c14_5376	C14orf37	000165; 0006468; 000166; 0004871; 0016740; 0004674; 0005524; 0005634	MAPKKK cascade; protein amino acid phosphorylation; nucleotide binding; signal transducer activity; transferase activity; protein serine/threonine kinase activity; ATP binding; nucleus	C14orf37	0.66441	0.30616	-2.19011	4.59922e-07	C14orf37	965.402	558.109	651.825	671.24	1411.32	614.653	786.911	819.919	809.923	275.746	384.931	145.499	258.024	378.646
1384953	C16orf30	Homo sapiens chromosome 16 open reading frame 30 (C16orf30), mRNA.	79652	NM_024600.1	NP_078876.1	13375800	ILMN_1751559	4210647	S	1511	TCCAGCTTTCCTGGTTAGCGCAACGCGGCTCCACGACCACACGCACTTCA	16	+	1545239-1545288						16p13.3e	C16orf30				FLJ20898; CLP24	FLJ20898; MGC111564; CLP24	C16orf30	16021	integral to membrane	C16orf30	0.21104	0.52703	2.47457	9.94373e-07	C16orf30	472.419	528.466	132.707	171.668	107.349	290.287	203.709	170.152	259.594	158.863	642.504	1079.31	974.82	689.154
1389154	C16orf53	Homo sapiens chromosome 16 open reading frame 53 (C16orf53), mRNA.	79447	NM_024516.2	NP_078792.1	39725648	ILMN_1727444	6650070	S	662	AGCAGATCCTTCGTACCGGGAGGGACCTCTTCAGCCTGGACTCGGAGGAC	16	+	29738458-29738507						16p11.2d	C16orf53				PA1; MGC4606	PA1; MGC4606	C16orf53	0006355; 0008270; 0005515	regulation of transcription DNA-dependent; zinc ion binding; protein binding	C16orf53	0.23043	0.37292	1.60358	8.51223e-10	C16orf53	302.451	366.791	283.031	269.146	260.101	261.099	203.469	277.541	277.954	45.8982	361.07	445.787	638.03	530.05
1387149	C16orf55	Homo sapiens chromosome 16 open reading frame 55 (C16orf55), mRNA.	124045	NM_153025.1	NP_694570.1	23308500	ILMN_1759261	1300411	S	1773	GTGGAAGGCCACGGAAGGGACCTGAACACGATGGCACGAGACAAGTTATC	16	+	88264759-88264808						16q24.3b	C16orf55				FLJ31606	FLJ31606	C16orf55	0006355; 0006350; 0046872; 0003676; 0008270; 0003700; 0005634	regulation of transcription DNA-dependent; transcription; metal ion binding; nucleic acid binding; zinc ion binding; transcription factor activity; nucleus	C16orf55	0.12267	0.18968	1.53221	0.00686	C16orf55	124.547	249.006	115.776	151.134	95.5569	205.739	123.726	141.443	150.866	51.3407	135.874	361.836	360.328	370.116
1389109	C16orf70	Homo sapiens chromosome 16 open reading frame 70 (C16orf70), mRNA.	80262	NM_025187.3	NP_079463.2	34147691	ILMN_1722296	2370047	S	2258	TGGCTGGGCCATTTCATGGCTCAAAGCCTCTGGGGGCTCAAGGAAGGCTG	16	+	65739360-65739409						16q22.1a	C16orf70			Interacting selectively with any protein or protein complex (a complex of two or more proteins that may include other nonprotein molecules) [goid 5515] [pmid 16713569] [evidence IPI]	lin-10; C16orf6; FLJ12076; LIN10	lin-10; C16orf6; FLJ12076; LIN10	LIN10	5554	molecular function unknown	C16orf70	0.09796	0.15436	1.56142	0.0015	C16orf70	151.849	158.431	114.018	163.617	117.011	105.082	56.7174	97.0575	120.473	36.2339	244.274	170.981	357.673	129.077
1380539	C16orf79	Homo sapiens chromosome 16 open reading frame 79 (C16orf79), mRNA.	283870	NM_182563.2	NP_872369.1	34222374	ILMN_1759411	3520482	S	762	AGCAGAGGGGCCCCGGAGACAGCGGCTGATTTATCTCTGCATCGACATCT	16	-	2199416-2199458:2199555-2199561						16p13.3d	C16orf79	Double layer of lipid molecules that encloses all cells, and, in eukaryotes, many organelles; may be a single or double lipid bilayer; also includes associated proteins [goid 16020] [evidence IEA]; Penetrating at least one phospholipid bilayer of a membrane. May also refer to the state of being buried in the bilayer with no exposure outside the bilayer. When used to describe a protein, indicates …			MGC21830	MGC21830	MGC21830	0006725; 0003824; 0008199; 0016021	aromatic compound metabolism; catalytic activity; ferric iron binding; integral to membrane	C16orf79	0.25777	0.54239	2.08499	1.34913e-07	C16orf79	485.458	550.012	376.916	228.896	218.169	263.164	211.457	180.695	314.346	139.567	610.891	853.024	694.669	850.565
1393976	C17orf44	Homo sapiens chromosome 17 open reading frame 44 (C17orf44), mRNA.	284029	NM_173621.1	NP_775892.1	27734741	ILMN_1681252	6860603	S	1752	TGCTCAACAGACCCATCAAGTCACGCTGTTGGACAGGCCTCGTGGCGCAA	17	-	8064965-8065014						17p13.1c	C17orf44				FLJ34790; MGC104931	FLJ34790; MGC104931	C17orf44	0007018; 0008090; 0007632; 0003777; 0005515; 0005874; 0005868; 0005737	microtubule-based movement; retrograde axon cargo transport; visual behavior; microtubule motor activity; protein binding; microtubule; cytoplasmic dynein complex; cytoplasm	C17orf44	0.08776	0.16412	1.85306	3e-05	C17orf44	118.501	155.562	78.8432	90.3201	95.4106	138.038	115.896	69.4862	107.757	29.6193	177.762	188.046	183.388	172.084
1391393	C17orf56	Homo sapiens chromosome 17 open reading frame 56 (C17orf56), mRNA.	146705	NM_144679.1	NP_653280.1	21389576	ILMN_1780025	3400500	S	2095	CCCTACGTGATCCTTCCCTGGCTCTCACCTGCTCCTTTAGGCTGTAATTG	17	-	76816778-76816827						17q25.3f	C17orf56	Double layer of lipid molecules that encloses all cells, and, in eukaryotes, many organelles; may be a single or double lipid bilayer; also includes associated proteins [goid 16020] [evidence IEA]; Penetrating at least one phospholipid bilayer of a membrane. May also refer to the state of being buried in the bilayer with no exposure outside the bilayer. When used to describe a protein, indicates …			FLJ31528	FLJ31528	C17orf56	0008283; 0007165; 0007186; 0004946; 0008528; 0004872; 0005887; 0005886	cell proliferation; signal transduction; G-protein coupled receptor protein signaling pathway; bombesin receptor activity; peptide receptor activity G-protein coupled; receptor activity; integral to plasma membrane; plasma membrane	C17orf56	0.38525	0.71556	1.84046	4.69392e-09	C17orf56	481.447	634.088	458.561	397.784	353.795	470.05	448.093	450.602	461.802	81.2616	610.231	1364.45	1319.92	783.356
1386986	C18orf17	Homo sapiens chromosome 18 open reading frame 17 (C18orf17), mRNA.	125488	NM_153211.1	NP_694943.1	23397461	ILMN_1746720	2070241	S	1797	GCATGTCCGCATCCATGCTGCTCTGGCCTCTCTGAGGGAATTGGTTCCTC	18	+	19966482-19966531						18q11.2c	C18orf17				FLJ33761; HsT2697	FLJ33761; HsT2697	C18orf17	5488	binding	C18orf17	0.10939	0.07067	-1.5622	0.00034	C18orf17	148.731	92.1715	87.9674	141.914	183.281	134.788	132.284	136.625	132.22	30.6174	49.1605	66.3279	72.3318	63.6343
1378526	C18orf45	Homo sapiens chromosome 18 open reading frame 45 (C18orf45), mRNA.	85019	NM_032933.3	NP_116322.2	40254998	ILMN_1690442	7320020	S	2133	CCCCAGAGGAAACAGGGTTTATGAGCACTGACAGATGTCTTCCCTGGGCA	18	-	19130737-19130786						18q11.2b	C18orf45	Double layer of lipid molecules that encloses all cells, and, in eukaryotes, many organelles; may be a single or double lipid bilayer; also includes associated proteins [goid 16020] [evidence IEA]; Penetrating at least one phospholipid bilayer of a membrane. May also refer to the state of being buried in the bilayer with no exposure outside the bilayer. When used to describe a protein, indicates …			MGC11386; FLJ44259	MGC138577; MGC11386; FLJ44259	C18orf45	0006412; 0006422; 0003676; 0004815; 0005524; 0005737	protein biosynthesis; aspartyl-tRNA aminoacylation; nucleic acid binding; aspartate-tRNA ligase activity; ATP binding; cytoplasm	C18orf45	0.63028	0.38418	-1.65567	0.00166	C18orf45	561.151	411.608	619.392	628.595	663.715	813.158	1110.7	1279.41	760.967	293.459	258.637	504.862	351.508	688.347
1383304	C18orf54	Homo sapiens chromosome 18 open reading frame 54 (C18orf54), mRNA.	162681	NM_173529.3	NP_775800.2	40255175	ILMN_1716006	110709	S	4272	CCTCCCAGTGTATTCTGCATTGTCCTTACCCTAGATCAGCCCCTTCTGTG	18	+	50161651-50161700						18q21.2c	C18orf54	The space external to the outermost structure of a cell. For cells without external protective or external encapsulating structures this refers to space outside of the plasma membrane. This term covers the host cell environment outside an intracellular parasite [goid 5576] [evidence IEA]			MGC33382	MGC33382	C18orf54	0006412; 0003735; 0005622; 0005840	protein biosynthesis; structural constituent of ribosome; intracellular; ribosome	C18orf54	0.14674	0.25216	1.70273	0.00301	C18orf54	358.42	310.054	181.14	161.532	136.85	141.904	76.1232	87.2822	181.663	101.255	502.973	393.444	221.012	242.765
1397355	C19orf39	Homo sapiens chromosome 19 open reading frame 39 (C19orf39), mRNA.	126074	NM_175871.2	NP_787067.1	31343610	ILMN_1707943	2650551	S	1357	GATTGCCTTATTTACTGCTGCGAACATTCTTGCACACATGCCCTGGTACG	19	+	11348322-11348371						19p13.2b	C19orf39				FLJ35119; MGC149562; MGC78620	FLJ35119; MGC149562; MGC78620	FLJ35119	3824	catalytic activity	C19orf39	0.14493	0.22447	1.53475	8.16758e-06	C19orf39	284.436	238.225	173.212	153.219	146.373	158.138	122.448	147.586	177.955	54.7702	276.478	372.33	247.093	323.771
1389827	C1orf162	Homo sapiens chromosome 1 open reading frame 162 (C1orf162), mRNA.	128346	NM_174896.2	NP_777556.1	31341350	ILMN_1754894	4010301	S	761	CCCTTGGGGGCATAGACTGCCTTCCTTGGACCCTTCCAAAGTGTGTGGTA	1	+	111822501-111822550						1p13.2d	C1orf162	Double layer of lipid molecules that encloses all cells, and, in eukaryotes, many organelles; may be a single or double lipid bilayer; also includes associated proteins [goid 16020] [evidence IEA]; Penetrating at least one phospholipid bilayer of a membrane. May also refer to the state of being buried in the bilayer with no exposure outside the bilayer. When used to describe a protein, indicates …			MGC24133	MGC24133	C1orf162	0006355; 0003676; 0008270; 0005634	regulation of transcription DNA-dependent; nucleic acid binding; zinc ion binding; nucleus	C1orf162	1.45624	2.69889	1.83642	0.00345	C1orf162	1253.7	2313.13	3298.72	1019.39	1867.75	1088.57	1843.4	1723.75	1801.05	749.827	4271.98	1445.51	2120.68	2257.4
1378445	C1orf165	Homo sapiens chromosome 1 open reading frame 165 (C1orf165), mRNA.	79656	NM_024603.1	NP_078879.1	13375806	ILMN_1675024	6860673	S	873	CCGAGCCGGAGTTACGGAGCACTTTCAGTGAGGAAGCAAATACGTCGTCC	1	-	48980935-48980984						1p33b	C1orf165				FLJ11588	FLJ11588	C1orf165	0006412; 0003735; 0003723; 0005842; 0005840	protein biosynthesis; structural constituent of ribosome; RNA binding; cytosolic large ribosomal subunit (sensu Eukaryota); ribosome	C1orf165	0.53141	0.32311	-1.65983	0.00039	C1orf165	564.501	432.302	420.265	558.257	960.895	554.664	922.212	726.81	642.488	207.43	308.183	253.089	249.388	503.656
1389063	C1orf218	Homo sapiens chromosome 1 open reading frame 218 (C1orf218), mRNA.	54530	NM_019049.1	NP_061922.1	9506654	ILMN_1789436	6960494	S	1936	AACGAGTTTTCAGTCTCTCTGTATGCCTTTGCTATTTAGGGGTCCACCCC	1	-	195745406-195745455						1q31.3c	C1orf218				FLJ20054; DKFZp547O0715	FLJ20054; DKFZp547O0715	FLJ20054	0008283; 0007165; 0006810; 0030850; 0007548; 0016049; 0007267; 0006355; 0006350; 0005497; 0046872; 0004882; 0046983; 0005496; 0004872; 0008270; 0003700; 0043565; 0005737; 0005634	cell proliferation; signal transduction; transport; prostate gland development; sex differentiation; cell growth; cell-cell signaling; regulation of transcription DNA-dependent; transcription; androgen binding; metal ion binding; androgen receptor activity; protein dimerization activity; steroid binding; receptor activity; zinc ion binding; transcription factor activity; sequence-specific DNA bin…	C1orf218	0.61054	0.39436	-1.56244	0.00013	C1orf218	507.112	708.792	573.685	779.956	740.507	806.981	897.369	899.551	739.244	141.002	381.196	307.066	402.994	825.177
1389454	C1orf66	Homo sapiens chromosome 1 open reading frame 66 (C1orf66), mRNA.	51093	NM_015997.2	NP_057081.2	21361524	ILMN_1791762	6980754	S	2062	ACATCTCAGACCCCATCATCTGAAAGTGCCCAGAGAGCACAGTGGCAGAG	1	+	154973184-154973233						1q23.1a	C1orf66	Double layer of lipid molecules that encloses all cells, and, in eukaryotes, many organelles; may be a single or double lipid bilayer; also includes associated proteins [goid 16020] [evidence IEA]; Penetrating at least one phospholipid bilayer of a membrane. May also refer to the state of being buried in the bilayer with no exposure outside the bilayer. When used to describe a protein, indicates …	The covalent alteration of one or more nucleotides within an rRNA molecule to produce an rRNA molecule with a sequence that differs from that coded genetically [goid 154] [evidence IEA]; The covalent alteration of one or more nucleotides within an rRNA molecule to produce an rRNA molecule with a sequence that differs from that coded genetically [goid 154] [evidence IEA]	Catalysis of the dimethylation two adjacent A residues in the loop closing the 3'-terminal stem of the 18S rRNA, using S-adenosyl-L-methionine as a methyl donor [goid 179] [evidence IEA]; Catalysis of the transfer of a methyl group from S-adenosyl-L-methionine to a nucleoside residue in an rRNA molecule [goid 8649] [evidence IEA]; Catalysis of the dimethylation two adjacent A residues in the loop…	CGI-41	CGI-41	C1orf66	000154; 0008649; 000179	rRNA modification; rRNA methyltransferase activity; rRNA (adenine-N6N6-)-dimethyltransferase activity	C1orf66	0.58235	0.92923	1.5811	4.65113e-08	C1orf66	813.274	861.374	801.282	679.172	464.916	633.599	672.197	726.224	706.505	125.562	1081.83	1354.57	1870.5	1107.6
1388631	C1orf71	Homo sapiens chromosome 1 open reading frame 71 (C1orf71), mRNA.	163882	NM_152609.1	NP_689822.1	22749246	ILMN_1670263	3830719	S	3521	AAATCTGTCCGTTAGGTGGCCTTTCCTTATCTGAGGTGTAGTGGTCTAAC	1	+	244896962-244897011						1q44d	C1orf71	Double layer of lipid molecules that encloses all cells, and, in eukaryotes, many organelles; may be a single or double lipid bilayer; also includes associated proteins [goid 16020] [evidence IEA]; Penetrating at least one phospholipid bilayer of a membrane. May also refer to the state of being buried in the bilayer with no exposure outside the bilayer. When used to describe a protein, indicates …			MGC18089; FLJ32001; RP11-452J6.1	MGC18089; FLJ32001; RP11-452J6.1	C1orf71	0008152; 0007049; 0045786; 0008202; 0005515; 0005489; 0016491; 0005795; 0005739; 005634	metabolism; cell cycle; negative regulation of progression through cell cycle; steroid metabolism; protein binding; electron transporter activity; oxidoreductase activity; Golgi stack; mitochondrion; nucleus	C1orf71	6.12663	3.94048	-1.56911	2e-05	C1orf71	6488.04	6302.92	5722.13	8016.65	10545.4	11220.3	7669.39	8263.73	8028.57	1977.62	3285.66	5818.41	3548.03	6106.86
1389672	C1orf89	Homo sapiens chromosome 1 open reading frame 89 (C1orf89), mRNA.	79363	NM_030907.2	NP_112169.1	34147392	ILMN_1683990	5870056	S	1198	TCCCGTGGCCTTTCCCCCTTTGGCAGCACCGATGGAGGATGACTGGGAGA	1	-	16430868-16430917						1p36.13f	C1orf89	The living contents of a cell; the matter contained within (but not including) the plasma membrane, usually taken to exclude large vacuoles and masses of secretory or ingested material. In eukaryotes it includes the nucleus and cytoplasm [goid 5622] [evidence IEA]; The living contents of a cell; the matter contained within (but not including) the plasma membrane, usually taken to exclude large va…	Any series of molecular signals in which a small monomeric GTPase relays one or more of the signals [goid 7264] [evidence IEA]; Any series of molecular signals in which a small monomeric GTPase relays one or more of the signals [goid 7264] [evidence IEA]; Any series of molecular signals in which a small monomeric GTPase relays one or more of the signals [goid 7264] [evidence IEA]	Interacting selectively with a nucleotide, any compound consisting of a nucleoside that is esterified with (ortho)phosphate or an oligophosphate at any hydroxyl group on the ribose or deoxyribose moiety [goid 166] [evidence IEA]; Interacting selectively with GTP, guanosine triphosphate [goid 5525] [evidence IEA]; Interacting selectively with GTP, guanosine triphosphate [goid 5525] [evidence IEA];…	RP4-733M16.4; MGC10731	RP4-733M16.4; MGC10731	C1orf89	0007264; 000166; 0005525	small GTPase mediated signal transduction; nucleotide binding; GTP binding	C1orf89	0.15669	0.10054	-1.57287	0.00271	C1orf89	136.501	113.031	129.405	215.596	281.594	229.099	193.513	193.598	186.542	57.2726	75.2133	145.382	78.7976	112.171
1383450	C20orf160	Homo sapiens chromosome 20 open reading frame 160 (C20orf160), mRNA.	140706	NM_080625.2	NP_542192.2	31542254	ILMN_1748206	6400661	S	2339	GGATCTGGAGCCTCTATCTGGTTAGTGTCGTAACCTCTGTGTGCCTCCCG	20	+	30083460-30083509						20q11.21b	C20orf160				dJ310O13.5; FLJ43600	dJ310O13.5; FLJ43600	C20orf160	0006629; 0007040; 0006665; 0005975; 0016798; 0004348; 0005764; 00016020	lipid metabolism; lysosome organization and biogenesis; sphingolipid metabolism; carbohydrate metabolism; hydrolase activity acting on glycosyl bonds; glucosylceramidase activity; lysosome; membrane	C20orf160	0.24862	0.50951	2.03061	3e-05	C20orf160	358.924	495.814	123.252	418.242	264.621	349.037	191.56	214.879	302.041	125.165	512.397	1348.98	540.55	535.982
1389826	C20orf18	Homo sapiens chromosome 20 open reading frame 18 (C20orf18), transcript variant 1, mRNA.	10616	NM_006462.2	NP_006453.1	14043037	ILMN_1751330	5220600	A	2459	GAGCCAGGAAGGAGACTGCACAGTTTTGAAAGCACAGCCCGTCAGGTCCG	20	+	359499-359548						20p13f	C20orf18				RBCK1; XAP4; RNF54; UBCE7IP3	XAP4; RNF54; ZRANB4; RBCK2; UBCE7IP3; C20orf18; HOIL1	C20orf18	0006355; 0003676; 0008270; 0005634	regulation of transcription DNA-dependent; nucleic acid binding; zinc ion binding; nucleus	C20orf18	0.98033	1.57975	1.59675	9.38925e-06	C20orf18	1308.36	1786.69	1101.03	1234.63	483.425	1117.57	1317.31	1189.3	1192.29	358.691	2235.87	2463.85	2519.66	2018.41
1392725	C20orf54	Homo sapiens chromosome 20 open reading frame 54 (C20orf54), mRNA.	113278	NM_033409.2	NP_212134.2	34147463	ILMN_1740923	2070678	S	2315	AGGGACGTAGTACCCCACACACCCCTTCCTGTCATCCTTCCTGGCCCATA	20	-	688957-689006						20p13f	C20orf54	Double layer of lipid molecules that encloses all cells, and, in eukaryotes, many organelles; may be a single or double lipid bilayer; also includes associated proteins [goid 16020] [evidence IEA]; Penetrating at least one phospholipid bilayer of a membrane. May also refer to the state of being buried in the bilayer with no exposure outside the bilayer. When used to describe a protein, indicates …			bA371L19.1; MGC10698	bA371L19.1; MGC10698	C20orf54	0016020; 0016021	membrane; integral to membrane	C20orf54	0.20842	0.51899	2.46745	0.00028	C20orf54	214.771	552.514	96.716	141.028	173.561	193.061	324.395	321.546	252.199	145.32	466.479	1693.28	438.706	789.86
1379905	C21orf77	Homo sapiens chromosome 21 open reading frame 77 (C21orf77), mRNA.	55264	NM_018277.1	NP_060747.1	8922778	ILMN_1789170	2450470	S	1353	GCTCAGACGACACACACGACCTACCCTGATGGTTTGGAAGTTGTGCAGTT	21	-	32867482-32867531						21q22.11b	C21orf77				FLJ10932	FLJ10932	C21orf77	0004; 0005554; 0030176; 0005783; 0016021	biological process unknown; molecular function unknown; integral to endoplasmic reticulum membrane; endoplasmic reticulum; integral to membrane	C21orf77	0.04359	0.08126	1.84728	0.00554	C21orf77	77.9831	113.24	9.31368	34.7772	22.0521	26.9972	63.2181	55.2746	50.3569	34.1868	83.781	159.69	106.942	155.948
1390045	C21orf91	Homo sapiens chromosome 21 open reading frame 91 (C21orf91), mRNA.	54149	NM_017447.2	NP_059143.2	40254881	ILMN_1698166	630626	S	685	TCTTGGTGAGGTAGAGCAACTGAATGCAAAGCTCCTACAGCAAATCCAGG	21	-	18087766-18087766:18089396-18089444						21q21.1c	C21orf91				DKFZp781D1223; C21orf38; C21orf14; YG81	DKFZp781D1223; C21orf38; C21orf14; YG81	C21orf91	0003723; 0005739; 0016021; 0019867	RNA binding; mitochondrion; integral to membrane; outer membrane	C21orf91	0.09724	0.15248	1.55378	0.00911	C21orf91	169.627	237.091	148.963	129.13	58.685	97.0732	66.5038	57.8719	120.618	63.3574	294.058	142.312	180.436	176.608
1383593	C3orf54	Homo sapiens chromosome 3 open reading frame 54 (C3orf54), mRNA.	389119	NM_203370.1	NP_976248.1	42766423	ILMN_1690454	2710678	S	884	TCATGCCCACCTCGCCCAGAACCTGAACTGCCTGCGGATGTCTCACGCTT	3	+	49817311-49817360						3p21.31c	C3orf54				MGC20416	MGC20416	C3orf54	0007156; 0005509; 0016020; 0005887; 0005886	homophilic cell adhesion; calcium ion binding; membrane; integral to plasma membrane; plasma membrane	C3orf54	0.25363	0.39375	1.5383	0.00634	C3orf54	346.374	291.34	576.653	317.47	348.216	247.359	183.588	147.309	307.289	131.26	607.914	416.018	395.254	290.535
1385318	C3orf62	Homo sapiens chromosome 3 open reading frame 62 (C3orf62), mRNA.	375341	NM_198562.1	NP_940964.1	38348399	ILMN_1679339	3800328	S	2930	GGGGTGCATCACTTCCCTGGTATTCCTACCAAAAACCCAAATTCCCAGTG	3	-	49281588-49281637						3p21.31d	C3orf62				FLJ43654; MGC62079; MGC61663; MGC23381	FLJ43654; MGC62079; MGC61663; MGC23381	C3orf62	0007565; 0005539; 0005578	pregnancy; glycosaminoglycan binding; extracellular matrix (sensu Metazoa)	C3orf62	0.12063	0.19568	1.60733	0.00098	C3orf62	223.35	269.72	119.961	133.73	128.228	98.2075	106.05	119.13	149.797	62.0149	183.53	263.44	292.877	314.022
1383671	C4orf15	Homo sapiens chromosome 4 open reading frame 15 (C4orf15), mRNA.	79441	NM_024511.4	NP_078787.2	56711323	ILMN_1686115	2630463	S	4952	GCATGTAGACAGATGAAGCCCAGCTCCCGCCCCTTTTACACTCATTCAGT	4	-	2200492-2200541						4p16.3b	C4orf15				MGC4701; IT1; DKFZp686I1868	MGC4701; IT1; DKFZp686I1868	C4orf15	5554	molecular function unknown	C4orf15	0.04156	0.06653	1.58624	3.62699e-06	C4orf15	39.1104	60.3651	40.4318	55.968	42.3194	35.2805	57.1674	45.123	46.9707	9.49123	71.536	108.783	77.6578	65.3167
1390680	C4orf32	Homo sapiens chromosome 4 open reading frame 32 (C4orf32), mRNA.	132720	NM_152400.1	NP_689613.1	22748852	ILMN_1700257	3190452	S	1761	TTGGGGCAGTCAGGCATTTGTATCTTTGGTAGGGCAACAAGTAAAACATG	4	+	113328846-113328895						4q25f	C4orf32	Double layer of lipid molecules that encloses all cells, and, in eukaryotes, many organelles; may be a single or double lipid bilayer; also includes associated proteins [goid 16020] [evidence IEA]; Penetrating at least one phospholipid bilayer of a membrane. May also refer to the state of being buried in the bilayer with no exposure outside the bilayer. When used to describe a protein, indicates …			FLJ39370	FLJ39370	FLJ39370	0006350; 0006357; 0006968; 0046872; 0008270; 0003704; 0003677; 0005634	transcription; regulation of transcription from RNA polymerase II promoter; cellular defense response; metal ion binding; zinc ion binding; specific RNA polymerase II transcription factor activity; DNA binding; nucleus	C4orf32	0.29891	0.46224	1.5323	0.00214	C4orf32	499.554	577.271	566.774	353.8	204.538	239.307	217.032	245.19	362.933	161.14	830.169	637.242	500.322	511.187
1386175	C5orf13	Homo sapiens chromosome 5 open reading frame 13 (C5orf13), mRNA.	9315	NM_004772.1	NP_004763.1	4758865	ILMN_1680738	6130725	S	1690	CAGGGCAGGCCTTGTTCTGAACTGTTTCGCTTCTGACTGTTAAACACCGA	5	-	111093165-111093214						5q22.1b	C5orf13		Any process that modulates the frequency, rate or extent of activity of any TGF-beta receptor signaling pathway [goid 17015] [evidence IEA]	Interacting selectively with any protein or protein complex (a complex of two or more proteins that may include other nonprotein molecules) [goid 5515] [evidence IEA]	PTZ17; D4S114; PRO1873; P311	PTZ17; D4S114; PRO1873; P311	C5orf13	6810	transport	C5orf13	2.34272	1.47657	-1.6012	0.00139	C5orf13	2966.84	2316.03	1744.32	4138.09	3446.2	4080.08	2453.62	2464.68	2951.23	867.89	1180.29	1299.16	1107.98	2911.46
1384494	C5orf29	Homo sapiens chromosome 5 open reading frame 29 (C5orf29), mRNA.	202309	NM_152687.1	NP_689900.1	22749378	ILMN_1675191	5340128	S	1882	GCCTCTTCTCTCAAGCCTGCTTCAGATCATAAGTTCTTCCACACATCTCC	5	+	57827608-57827657						5q11.2g	C5orf29	Double layer of lipid molecules that encloses all cells, and, in eukaryotes, many organelles; may be a single or double lipid bilayer; also includes associated proteins [goid 16020] [evidence IEA]; Penetrating at least one phospholipid bilayer of a membrane. May also refer to the state of being buried in the bilayer with no exposure outside the bilayer. When used to describe a protein, indicates …			MGC70478; FLJ33641	MGC70478; FLJ33641	FLJ33641	0006511; 0006512; 0004197; 0005509; 0004221	ubiquitin-dependent protein catabolism; ubiquitin cycle; cysteine-type endopeptidase activity; calcium ion binding; ubiquitin thiolesterase activity	C5orf29	0.10303	0.19738	1.89825	0.00197	C5orf29	181.416	136.775	178.393	157.527	87.0864	84.8502	97.7255	89.2791	126.631	41.8812	446.967	102.986	130.302	132.477
1391335	C5orf39	Homo sapiens chromosome 5 open reading frame 39 (C5orf39), mRNA.	389289	NM_001014279.1	NP_001014301.1	62122949	ILMN_1675465	60470	S	708	GGATTCTTCGCGTTGGTTTTGCCGCGTTCTCTGTACTCTGGGCGTGCTGT	5	-	43075341-43075390						5p12c	C5orf39				AX2R; AXIIR	AX2R; AXIIR	LOC389289	4872	receptor activity	C5orf39	0.1595	0.28403	1.76447	0.00049	C5orf39	159.559	183.572	141.91	124.27	156.621	128.185	316.413	307.751	189.785	77.8106	332.659	478.102	562.127	319.868
1396042	C6orf165	Homo sapiens chromosome 6 open reading frame 165 (C6orf165), transcript variant 1, mRNA.	154313	NM_001031743.1	NP_001026913.1	72534779	ILMN_1757837	1780025	I	1859	GGTGCCCAGGCCTCAGATTTACTTGGCTGGTCTTCGTGGAGGAAAGAGCG	6	+	88230585-88230634						6q15a	C6orf165				FLJ25974; dJ382I10.1	FLJ25974; dJ382I10.1	C6orf165	0007600; 0007165; 0007186; 0007608; 0004984; 0004872; 00016021	sensory perception; signal transduction; G-protein coupled receptor protein signaling pathway; sensory perception of smell; olfactory receptor activity; receptor activity; integral to membrane	C6orf165	0.13602	0.0799	-1.7181	0.00025	C6orf165	229.332	177.4	89.6121	125.378	206.179	167.819	181.89	142.214	164.978	44.8072	41.9829	20.7284	140.986	78.1619
1377853	C6orf165	Homo sapiens chromosome 6 open reading frame 165 (C6orf165), transcript variant 2, mRNA.	154313	NM_178823.2	NP_849145.1	31343459	ILMN_1771746	5890382	A	1331	CGGGGATTTTGTGCTTACACGTTTGCTGCAACAGATGGTCTTCTCCTTCC	6	+	88197559-88197608	770193	I	2395	CCCGGGCTGGTCTCAAACTTGTGGCTTCAAGTTATCCTCCCGCCTTGGCA	88202309-88202358	6q15a	C6orf165				FLJ25974; dJ382I10.1	FLJ25974; dJ382I10.1	C6orf165	0007155; 0005198	cell adhesion; structural molecule activity	C6orf165	0.18793	0.10274	-1.84607	2.82753e-09	C6orf165	215.706	194.661	183.49	167.335	204.865	285.398	259.194	283.22	224.234	45.7672	86.1783	72.5906	123.764	135.016
1386624	C6orf204	Homo sapiens chromosome 6 open reading frame 204 (C6orf204), mRNA.	387119	NM_206921.1	NP_996804.1	46048451	ILMN_1793559	7100296	S	1201	CCCACCTGCATGAGAGGATAAGGGATAATGAATTACGGGCTCAACATGCC	6	-	118939204-118939253						6q22.31a	C6orf204				RP11-57K17.2; bA57K17.2; NY-BR-15	MGC131785; RP11-57K17.2; bA57K17.2; NY-BR-15	C6orf204	5515	protein binding	C6orf204	0.61097	0.36781	-1.67638	1.3657e-07	C6orf204	972.508	788.033	841.886	634.666	628.953	932.526	613.834	523.343	741.969	164.78	562.88	356.303	430.02	442.417
1393463	C6orf35	Homo sapiens chromosome 6 open reading frame 35 (C6orf35), mRNA.	55836	NM_018452.2	NP_060922.2	24431986	ILMN_1682444	5130487	S	2534	GGAGGCTGGCAGGGACAAATTCCCTAAAAGAGGGACCAAGCGTCAGCTCC	6	-	156689-156738							C6orf35	Double layer of lipid molecules that encloses all cells, and, in eukaryotes, many organelles; may be a single or double lipid bilayer; also includes associated proteins [goid 16020] [evidence IEA]; Penetrating at least one phospholipid bilayer of a membrane. May also refer to the state of being buried in the bilayer with no exposure outside the bilayer. When used to describe a protein, indicates …			BM033	FLJ10029; MGC34308; BM033	C6orf35	0006486; 0030145; 0016757; 0008499; 0008378; 0016020; 0016021; 0005795	protein amino acid glycosylation; manganese ion binding; transferase activity transferring glycosyl groups; UDP-galactose:beta-N-acetylglucosamine beta-13-galactosyltransferase activity; galactosyltransferase activity; membrane; integral to membrane; Golgi stack	C6orf35	0.15739	0.09948	-1.59673	0.00132	C6orf35	149.998	125.03	126.718	263.634	285.454	206.743	170.304	176.338	188.027	59.9799	103.349	90.3645	106.266	119.589
1393595	C6orf59	Homo sapiens chromosome 6 open reading frame 59 (C6orf59), mRNA.	79992	NM_024929.1	NP_079205.1	13376403	ILMN_1655572	3830563	S	1436	AGTTGGCTGGAGGAGGCCAGTCAGGAGTGCAAGAACCCCGCGTACTCTGT	6	-	161501519-161501568						6q26a	C6orf59				FLJ23112; RIPPLY2		C6orf59	0007018; 0016192; 0015031; 000166; 0003777; 0005215; 0005524; 0005874; 0005795; 0005875	microtubule-based movement; vesicle-mediated transport; protein transport; nucleotide binding; microtubule motor activity; transporter activity; ATP binding; microtubule; Golgi stack; microtubule associated complex	C6orf59	0.36745	0.63791	1.72022	0.00466	C6orf59	478.925	543.989	324.066	941.047	113.389	404.415	385.507	371.373	445.339	236.706	935.512	1066.66	781.27	693.297
1396764	C6orf60	Homo sapiens chromosome 6 open reading frame 60 (C6orf60), mRNA.	79632	NM_024581.3	NP_078857.4	40255142	ILMN_1696699	3400286	S	3718	GCTTCTCCAGATCCCCAGCGCCAGGAGTGGTTTGCCCGGTACTTCACATT	6	-	119322970-119323019						6q22.31a	C6orf60				FLJ13942	FLJ13942	C6orf60	0008033; 0004730; 0016853; 0005634	tRNA processing; pseudouridylate synthase activity; isomerase activity; nucleus	C6orf60	1.00906	0.59652	-1.70715	5e-05	C6orf60	1107.29	1177.92	653.743	1117.03	2203.17	1199.29	1156.63	1291.59	1238.33	434.121	860.619	579.76	754.379	989.952
1383914	C6orf65	Homo sapiens chromosome 6 open reading frame 65 (C6orf65), mRNA.	221336	NM_152731.1	NP_689944.1	22749448	ILMN_1706969	4220168	S	2018	AGGCTTCTCGCTTGGTGTCAGGTTGTCACATGTGACCACTGTGCAATGCG	6	+	56999839-56999888						6p12.1a	C6orf65				bA203B9.1; FLJ30162	bA203B9.1; FLJ30162	C6orf65	5488	binding	C6orf65	2.42715	1.58071	-1.54961	0.00428	C6orf65	4425.7	2235.18	1496.75	4529.64	4207.7	2532.91	2528.94	2471.54	3053.55	1157.09	1857.85	1493.35	1155.34	2937.47
1377472	C6orf66	Homo sapiens chromosome 6 open reading frame 66 (C6orf66), mRNA.	29078	NM_014165.1	NP_054884.1	7661785	ILMN_1659524	7150601	S	146	AGCAAGATGAAGCCCTCTGTCGCTCCCAGACACCCCTCTACCAACAGCCT	6	-	97452281-97452330						6q16.1f	C6orf66				bA22L21.1; HRPAP20; My013; HSPC125	bA22L21.1; HRPAP20; My013; HSPC125	C6orf66	0006812; 0006813; 0030955; 0005249; 0005515; 0005624; 0016020; 0016021; 0008076	cation transport; potassium ion transport; potassium ion binding; voltage-gated potassium channel activity; protein binding; membrane fraction; membrane; integral to membrane; voltage-gated potassium channel complex	C6orf66	0.50071	0.31754	-1.59137	0.00452	C6orf66	679.417	427.066	439.034	702.618	1132.75	439.774	528.548	505.022	606.779	237.82	355.434	214.459	310.546	291.218
1379259	C7orf23	Homo sapiens chromosome 7 open reading frame 23 (C7orf23), mRNA.	79161	NM_024315.2	NP_077291.1	34147374	ILMN_1751143	6590681	S	536	TGCAAACCTGTACTTCCATGATGTGGGAAGGTGAGGCTGCCAAGGAGAAG	7	-	86663871-86663887:86663888-86663920						7q21.12a	C7orf23	Double layer of lipid molecules that encloses all cells, and, in eukaryotes, many organelles; may be a single or double lipid bilayer; also includes associated proteins [goid 16020] [evidence IEA]; Penetrating at least one phospholipid bilayer of a membrane. May also refer to the state of being buried in the bilayer with no exposure outside the bilayer. When used to describe a protein, indicates …			MM-TRAG; MGC4175	MM-TRAG; MGC4175	C7orf23	16021	integral to membrane	C7orf23	0.52337	0.87869	1.6636	0.00091	C7orf23	994.426	1104.05	505.464	405.676	517.87	399.476	574.648	545.356	630.871	267.074	959.811	562.961	1108.1	869.39
1396264	C8orf61	Homo sapiens chromosome 8 open reading frame 61 (C8orf61), mRNA.	619435	NM_001034061.1	NP_001029233.1	77416370	ILMN_1684576	4880243	S	1431	CTGTGCAGAACCCAGCACACGTGATTTTGTGTGACATGCCAGCAGCCTGG	8	+	1721711-1721760						8p23.3a	C8orf61				FLJ39417	FLJ39417; EPMR; C8orf61	C8orf61	0006811; 0006813; 0030955; 0005267; 0005244; 0005624; 0016020; 0016021	ion transport; potassium ion transport; potassium ion binding; potassium channel activity; voltage-gated ion channel activity; membrane fraction; membrane; integral to membrane	C8orf61	0.54024	0.83413	1.52992	0.00029	C8orf61	557.928	708.279	867.322	864.364	472.864	763.717	475.235	532.454	655.271	166.262	1381.36	1800.8	1273.82	1159.24
1389873	C9orf3	Homo sapiens chromosome 9 open reading frame 3 (C9orf3), mRNA.	84909	NM_032823.3	NP_116212.3	24432057	ILMN_1674629	6840008	S	2497	GGTCCCAGCCAGGCACACACAAAAGGCAGATTCTCGTAAACGCAGCCTCC	9	+	96888939-96888988						9q22.32a	C9orf3		The hydrolysis of a peptide bond or bonds within a protein [goid 6508] [evidence IEA]; The hydrolysis of a peptide bond or bonds within a protein [goid 6508] [evidence IEA]; The chemical reactions and pathways resulting in the formation of leukotriene, a pharmacologically active substance derived from a polyunsaturated fatty acid, such as arachidonic acid [goid 19370] [evidence IEA]	The selective, often stoichiometric, interaction of a molecule with one or more specific sites on another molecule [goid 5488] [evidence IEA]; Catalysis of the hydrolysis of peptide bonds by a mechanism in which water acts as a nucleophile, one or two metal ions hold the water molecule in place, and charged amino acid side chains are ligands for the metal ions [goid 8237] [evidence IEA]; Interact…	C90RF3; FLJ14675; APO; AP-O	C90RF3; FLJ14675; APO; AP-O	C9orf3	0006508; 0046872; 0004177; 0008270; 0004179; 0008237	proteolysis and peptidolysis; metal ion binding; aminopeptidase activity; zinc ion binding; membrane alanyl aminopeptidase activity; metallopeptidase activity	C9orf3	0.22304	0.35479	1.57617	2.80781e-06	C9orf3	365.241	365.44	281.328	336.358	182.989	188.525	225.965	214.252	270.012	77.4297	415.334	456.704	558.501	359.877
1381202	C9orf4	Homo sapiens chromosome 9 open reading frame 4 (C9orf4), mRNA.	23732	NM_014334.1	NP_055149.1	65301136	ILMN_1760866	840605	S	1000	GCTCTGACCTTCTACCTATTGATGGGAACCCCCTAACCACAGCTGCAGGG	9	-	110939541-110939555:110939556-110939590						9q31.3a	C9orf4	The part of a cell or its extracellular environment in which a gene product is located. A gene product may be located in one or more parts of a cell and its location may be as specific as a particular macromolecular complex, that is, a stable, persistent association of macromolecules that function together [goid 5575] [evidence ND ]; Double layer of lipid molecules that encloses all cells, and, i…	The chemical reactions and pathways resulting in the breakdown of histidine, 2-amino-3-(1H-imidazol-4-yl)propanoic acid [goid 6548] [evidence IEA]; Any process specifically pertinent to the functioning of integrated living units: cells, tissues, organs, and organisms. A process is a collection of molecular events with a defined beginning and end [goid 8150] [evidence ND ]	Elemental activities, such as catalysis or binding, describing the actions of a gene product at the molecular level. A given gene product may exhibit one or more molecular functions [goid 3674] [evidence ND ]; Catalysis of the reaction: 3,4-dihydroxyphenethylamine + ascorbate + O2 = noradrenaline + dehydroascorbate + H2O [goid 4500] [evidence IEA]	CG-6; CG6	CG-6; CG6	C9orf4	0006584; 0006548; 0004500; 0008372	catecholamine metabolism; histidine catabolism; dopamine beta-monooxygenase activity; cellular component unknown	C9orf4	0.41625	0.23945	-1.75437	1e-05	C9orf4	522.953	406.529	339.861	581.461	774.88	556.867	400.156	412.664	499.421	140.373	251.365	201.34	137.797	366.455
1378079	C9orf75	Homo sapiens chromosome 9 open reading frame 75 (C9orf75), mRNA.	286262	NM_173691.1	NP_775962.1	27734964	ILMN_1664283	620358	S	1953	CTCACAGTGGCCATGGGGTGTCGGGGTGAAGGGCTGTCCCAGCTACTTGT	9	-	139205996-139206045						9q34.3e	C9orf75				MGC131933; RP11-350O14.7; FLJ90254	MGC131933; RP11-350O14.7; FLJ90254	C9orf75	5509	calcium ion binding	C9orf75	0.33063	0.51648	1.54784	0.00021	C9orf75	442.773	371.735	457.385	539.252	439.231	432.808	254.347	244.925	397.807	102.227	678.262	1076.62	826.297	542.265
1383119	CA2	Homo sapiens carbonic anhydrase II (CA2), mRNA.	760	NM_000067.1	NP_000058.1	4557394	ILMN_1662795	3060438	S	1004	GACTAGACCAATTGTCATGCTTGACACAACTGCTGTGGCTGGTTGGTGCT	8	+	86580426-86580475						8q21.2b	CA2	A membrane-bounded organelle of eukaryotic cells in which chromosomes are housed and replicated. In most cells, the nucleus contains all of the cell's chromosomes except the organellar chromosomes, and is the site of RNA synthesis and processing. In some species, or in specialized cell types, RNA metabolism or DNA replication may be absent [goid 5634] [pmid 18029348] [evidence IDA]; All of the co…	The process by which the anatomical structures of epithelia are generated and organized. Morphogenesis pertains to the creation of form. An epithelium consists of closely packed cells arranged in one or more layers, that covers the outer surfaces of the body or lines any internal cavity or tube [goid 2009] [evidence IEA]; The chemical reactions and pathways involving compounds containing a single…	Catalysis of the reaction: H2CO3 = CO2 + H2O [goid 4089] [pmid 1928091] [evidence TAS]; Interacting selectively with zinc (Zn) ions [goid 8270] [pmid 3151020] [evidence IDA]; Catalysis of the cleavage of C-C, C-O, C-N and other bonds by other means than by hydrolysis or oxidation, or conversely adding a group to a double bond. They differ from other enzymes in that two substrates are involved in …	Car2; CA-II; CAII; CA II	Car2; CA-II; CAII; CA II	CA2	0006730; 0046872; 0016829; 0008270; 0004089; 0005737	one-carbon compound metabolism; metal ion binding; lyase activity; zinc ion binding; carbonate dehydratase activity; cytoplasm	CA2	9.42075	15.4247	1.62238	0.00493	CA2	15177.3	16732.4	12616.3	10112.2	6202.58	7342.62	12396	12174	11594.2	3597.72	19055.5	9292.66	30213.4	15887.7
1377917	CA5A	Homo sapiens carbonic anhydrase VA, mitochondrial (CA5A), nuclear gene encoding mitochondrial protein, mRNA.	763	NM_001739.1	NP_001730.1	4502520	ILMN_1731292	6020681	S	926	GAAGGTCTGGGCGTCCTTCCAGGCCACTAATGAGGGCACAAGGTCCTAGA	16	-	86479234-86479235:86479236-86479283						16q24.2b	CA5A	A semiautonomous, self replicating organelle that occurs in varying numbers, shapes, and sizes in the cytoplasm of virtually all eukaryotic cells. It is notably the site of tissue respiration [goid 5739] [pmid 8356065] [evidence TAS]; The gel-like material, with considerable fine structure, that lies in the matrix space, or lumen, of a mitochondrion. It contains the enzymes of the tricarboxylic a…	The chemical reactions and pathways involving compounds containing a single carbon atom [goid 6730] [evidence IEA]	Catalysis of the reaction: H2CO3 = CO2 + H2O [goid 4089] [pmid 8356065] [evidence TAS]; Interacting selectively with zinc (Zn) ions [goid 8270] [evidence IEA]; Catalysis of the cleavage of C-C, C-O, C-N and other bonds by other means than by hydrolysis or oxidation, or conversely adding a group to a double bond. They differ from other enzymes in that two substrates are involved in one reaction di…	CAVA; CAV; CA5	CAVA; CAV; CA5	CA5A	0006730; 0046872; 0016829; 0008270; 0004089; 0005759	one-carbon compound metabolism; metal ion binding; lyase activity; zinc ion binding; carbonate dehydratase activity; mitochondrial matrix	CA5A	0.10329	0.16536	1.58634	0.00631	CA5A	115.136	214.443	94.0379	114.208	90.7536	128.55	105.888	152.067	126.886	40.404	250.293	288.121	169.674	221.095
1377366	CACNA1E	Homo sapiens calcium channel, voltage-dependent, R type, alpha 1E subunit (CACNA1E), mRNA.	777	NM_000721.2	NP_000712.2	53832004	ILMN_1664047	2760452	S	9561	CACTGCAGATGCGGTCACCTGACTGACCACCTGGGTTTTCTATTACCAGT	1	+	180037176-180037225						1q25.3b	CACNA1E	The membrane surrounding a cell that separates the cell from its external environment. It consists of a phospholipid bilayer and associated proteins [goid 5886] [pmid 8825650] [evidence EXP]; A protein complex that forms a transmembrane channel through which calcium ions may pass in response to changes in membrane potential [goid 5891] [pmid 8071363] [evidence TAS]; Penetrating at least one phosp…	The directed movement of charged atoms or small charged molecules into, out of, within or between cells [goid 6811] [evidence IEA]; The directed movement of calcium (Ca) ions into, out of, within or between cells [goid 6816] [evidence IEA]; The process of communication from a neuron to a target (neuron, muscle, or secretory cell) across a synapse [goid 7268] [pmid 8071363] [evidence TAS]	Catalysis of the transmembrane transfer of an ion by a voltage-gated channel. An ion is an atom or group of atoms carrying an electric charge by virtue of having gained or lost one or more electrons [goid 5244] [evidence IEA]; Catalysis of the transmembrane transfer of a calcium ion by a voltage-gated channel [goid 5245] [pmid 8071363] [evidence TAS]; Interacting selectively with calcium ions (Ca…	CACH6; BII; CACNL1A6; Cav2.3	CACH6; BII; CACNL1A6; Cav2.3	CACNA1E	0007268; 0006812; 0006816; 0005245; 0005509; 0005891; 0016020; 0016021	synaptic transmission; cation transport; calcium ion transport; voltage-gated calcium channel activity; calcium ion binding; voltage-gated calcium channel complex; membrane; integral to membrane	CACNA1E	0.69806	0.32689	-2.15514	9e-05	CACNA1E	886.567	658.266	497.94	1116.67	1485.74	1122.74	574.942	484.15	853.376	362.75	358.935	201.779	82.2073	601.723
1382252	CACNA1G	Homo sapiens calcium channel, voltage-dependent, T type, alpha 1G subunit (CACNA1G), transcript variant 3, mRNA.	8913	NM_198396.1	NP_938406.1	38505291	ILMN_1703016	5890092	I	7775	CTTTTATGTGTCTCAGAATATTTTTGAGGCGAAGGCGTCTGTCTCTTGGC	17	+	46059482-46059531						17q21.33b	CACNA1G	A protein complex that forms a transmembrane channel through which calcium ions may pass in response to changes in membrane potential [goid 5891] [pmid 9495342] [evidence TAS]; Double layer of lipid molecules that encloses all cells, and, in eukaryotes, many organelles; may be a single or double lipid bilayer; also includes associated proteins [goid 16020] [evidence IEA]; Penetrating at least one…	The directed movement of charged atoms or small charged molecules into, out of, within or between cells [goid 6811] [evidence IEA]; The directed movement of calcium (Ca) ions into, out of, within or between cells [goid 6816] [evidence IEA]; The directed movement of charged atoms or small charged molecules into, out of, within or between cells [goid 6811] [evidence IEA]; The directed movement of c…	Catalysis of the transmembrane transfer of an ion by a voltage-gated channel. An ion is an atom or group of atoms carrying an electric charge by virtue of having gained or lost one or more electrons [goid 5244] [evidence IEA]; Interacting selectively with calcium ions (Ca2+) [goid 5509] [evidence IEA]; Catalysis of the transmembrane transfer of a calcium ion by a low voltage-gated channel [goid 8…	Ca(V)T.1; Cav3.1; NBR13; MGC117234	Ca(V)T.1; Cav3.1; NBR13; MGC117234	CACNA1G	0006816; 0006812; 0008332; 0005245; 0005509; 0005261; 0005891; 0005624; 0016021; 0016020	calcium ion transport; cation transport; low voltage-gated calcium channel activity; voltage-gated calcium channel activity; calcium ion binding; cation channel activity; voltage-gated calcium channel complex; membrane fraction; integral to membrane; membrane	CACNA1G	0.5996	0.25536	-2.3697	2.77573e-09	CACNA1G	1031.82	609.647	404.467	708.076	620.2	928.041	694.16	807.67	725.51	196.565	232.309	187.777	88.3451	531.03
1392367	CACNA2D2	Homo sapiens calcium channel, voltage-dependent, alpha 2/delta subunit 2 (CACNA2D2), transcript variant 1, mRNA.	9254	NM_001005505.1	NP_001005505.1	54112391	ILMN_1711049	7210475	A	5091	CTGGGTCTAATCCTTCTCATTACCCACCCGACCTGGCTGCCCCTCACCTT	3	-	50375436-50375485						3p21.31b	CACNA2D2	Double layer of lipid molecules that encloses all cells, and, in eukaryotes, many organelles; may be a single or double lipid bilayer; also includes associated proteins [goid 16020] [evidence IEA]; Penetrating at least one phospholipid bilayer of a membrane. May also refer to the state of being buried in the bilayer with no exposure outside the bilayer. When used to describe a protein, indicates …	The directed movement of charged atoms or small charged molecules into, out of, within or between cells [goid 6811] [evidence IEA]; The directed movement of calcium (Ca) ions into, out of, within or between cells [goid 6816] [evidence IEA]	Catalysis of the transmembrane transfer of an ion by a voltage-gated channel. An ion is an atom or group of atoms carrying an electric charge by virtue of having gained or lost one or more electrons [goid 5244] [evidence IEA]; Catalysis of facilitated diffusion of a calcium (by an energy-independent process) involving passage through a transmembrane aqueous pore or channel without evidence for a …	gene 26; KIAA0558; LUAC11.1; CACNA2D	gene 26; KIAA0558; LUAC11.1; CACNA2D	CACNA2D2	16020	membrane	CACNA2D2	1.1333	0.56661	-2.01857	2e-05	CACNA2D2	1167.29	934.972	752.847	1565.09	2212.2	1770.67	1433.31	1354.07	1398.8	465.484	608.058	289.884	138.771	743.232
1390026	CACNA2D3	Homo sapiens calcium channel, voltage-dependent, alpha 2/delta subunit 3 (CACNA2D3), mRNA.	55799	NM_018398.2	NP_060868.2	54112396	ILMN_1754076	7550598	S	3562	CACCCTTCATCAGAAATGGGACCGCAAGTGGTAGGCAGTGTCCCTTCTGC	3	+	55083511-55083560						3p21.1a-p14.3d	CACNA2D3	Double layer of lipid molecules that encloses all cells, and, in eukaryotes, many organelles; may be a single or double lipid bilayer; also includes associated proteins [goid 16020] [evidence IEA]; Penetrating at least one phospholipid bilayer of a membrane. May also refer to the state of being buried in the bilayer with no exposure outside the bilayer. When used to describe a protein, indicates …	The directed movement of charged atoms or small charged molecules into, out of, within or between cells [goid 6811] [evidence IEA]; The directed movement of calcium (Ca) ions into, out of, within or between cells [goid 6816] [evidence IEA]	Catalysis of the transmembrane transfer of an ion by a voltage-gated channel. An ion is an atom or group of atoms carrying an electric charge by virtue of having gained or lost one or more electrons [goid 5244] [evidence IEA]; Catalysis of facilitated diffusion of a calcium (by an energy-independent process) involving passage through a transmembrane aqueous pore or channel without evidence for a …	HSA272268	HSA272268	CACNA2D3	16020	membrane	CACNA2D3	0.5748	0.3717	-1.56065	0.00349	CACNA2D3	688.004	820.793	307.229	948.103	829.715	750.186	630.365	611.319	698.214	193.683	390.956	219.073	260.187	968.866
1387979	CACNB2	Homo sapiens calcium channel, voltage-dependent, beta 2 subunit (CACNB2), transcript variant 8, mRNA.	783	NM_201572.1	NP_963866.1	45359837	ILMN_1653878	4890021	A	2890	AGACTAACGAAGAAACTAGAGACTGATATCGAGCATTCTGCCCACCTCGC	10	+	18869722-18869771						10p12.33b	CACNB2	The membrane surrounding a cell that separates the cell from its external environment. It consists of a phospholipid bilayer and associated proteins [goid 5886] [evidence IEA]; Penetrating at least one phospholipid bilayer of a plasma membrane. May also refer to the state of being buried in the bilayer with no exposure outside the bilayer [goid 5887] [pmid 9594024] [evidence NAS]; A protein compl…	The directed movement of calcium (Ca) ions into, out of, within or between cells [goid 6816] [evidence IEA]; The directed movement of charged atoms or small charged molecules into, out of, within or between cells [goid 6811] [evidence IEA]; The directed movement of calcium (Ca) ions into, out of, within or between cells [goid 6816] [evidence NAS]; The process whose specific outcome is the progres…	Catalysis of the transmembrane transfer of a calcium ion by a voltage-gated channel [goid 5245] [evidence IEA]; Catalysis of the transmembrane transfer of an ion by a voltage-gated channel. An ion is an atom or group of atoms carrying an electric charge by virtue of having gained or lost one or more electrons [goid 5244] [evidence IEA]; Catalysis of the transmembrane transfer of a calcium ion by …	CACNLB2; MYSB; FLJ23743	CACNLB2; MYSB; FLJ23743	CACNB2	0006811; 0006816; 0007528; 0005245; 0005509; 0005891; 0005624	ion transport; calcium ion transport; neuromuscular junction development; voltage-gated calcium channel activity; calcium ion binding; voltage-gated calcium channel complex; membrane fraction	CACNB2	0.61854	0.3634	-1.71774	0.00141	CACNB2	808.407	882.578	501.165	792.006	1226.64	735.652	550.407	521.921	752.347	240.201	267.354	240.825	104.645	649.412
1383210	CACNB4	Homo sapiens calcium channel, voltage-dependent, beta 4 subunit (CACNB4), transcript variant 1, mRNA.	785	NM_001005747.1	NP_001005747.1	54607067	ILMN_1673503	5860707	A	2743	GCTTCTCTCAGTCTCTGTCTTTGAATATCTGAATGTTCTGGCCCTTCAAC	2	-	152402774-152402823						2q23.3c	CACNB4	That part of the cytoplasm that does not contain membranous or particulate subcellular components [goid 5829] [pmid 8825650] [evidence EXP]; The membrane surrounding a cell that separates the cell from its external environment. It consists of a phospholipid bilayer and associated proteins [goid 5886] [pmid 16525042] [evidence IDA]; A protein complex that forms a transmembrane channel through whic…	The directed movement of calcium (Ca) ions into, out of, within or between cells [goid 6816] [evidence IEA]; The directed movement of calcium (Ca) ions into, out of, within or between cells [goid 6816] [evidence IEA]; The directed movement of charged atoms or small charged molecules into, out of, within or between cells [goid 6811] [evidence IEA]; The directed movement of calcium (Ca) ions into, …	Catalysis of the transmembrane transfer of a calcium ion by a voltage-gated channel [goid 5245] [evidence IEA]; Catalysis of the transmembrane transfer of a calcium ion by a voltage-gated channel [goid 5245] [evidence IEA]; Catalysis of the transmembrane transfer of an ion by a voltage-gated channel. An ion is an atom or group of atoms carrying an electric charge by virtue of having gained or los…	EA5; CACNLB4; CAB4; EJM	EA5; CACNLB4; CAB4; EJM	CACNB4	0006811; 0006816; 0005245; 0005509; 0005891; 0005624	ion transport; calcium ion transport; voltage-gated calcium channel activity; calcium ion binding; voltage-gated calcium channel complex; membrane fraction	CACNB4	0.38493	0.13746	-2.82602	1.92124e-06	CACNB4	633.076	427.434	176.491	491.094	887.472	597.505	272.852	241.896	465.977	237.94	135.966	103.017	44.3062	197.665
1378046	CACNG2	Homo sapiens calcium channel, voltage-dependent, gamma subunit 2 (CACNG2), mRNA.	10369	NM_006078.2	NP_006069.1	22027543	ILMN_1769492	4920706	S	1136	CCGCCACCTACAACTCCGACAGGGATAACAGCTTCCTCCAGGTTCACAAC	22	-	35290412-35290461						22q12.3d	CACNG2	The membrane surrounding a cell that separates the cell from its external environment. It consists of a phospholipid bilayer and associated proteins [goid 5886] [pmid 8825650] [evidence EXP]; A protein complex that forms a transmembrane channel through which calcium ions may pass in response to changes in membrane potential [goid 5891] [pmid 10221464] [evidence TAS]; A belt-like region of very cl…	The directed movement of charged atoms or small charged molecules into, out of, within or between cells [goid 6811] [evidence IEA]; The directed movement of calcium (Ca) ions into, out of, within or between cells [goid 6816] [evidence IEA]; The process whose specific outcome is the progression of the neuromuscular junction over time, from its formation to the mature structure [goid 7528] [evidenc…	The action of a molecule that contributes to the structural integrity of a complex or assembly within or outside a cell [goid 5198] [evidence IEA]; Catalysis of the transmembrane transfer of an ion by a voltage-gated channel. An ion is an atom or group of atoms carrying an electric charge by virtue of having gained or lost one or more electrons [goid 5244] [evidence IEA]; Catalysis of the transme…	MGC138502; MGC138504	MGC138502; MGC138504	CACNG2	0006811; 0006816; 0005198; 0005245; 0005509; 0005923; 0005891; 0005624; 0016021; 00016020	ion transport; calcium ion transport; structural molecule activity; voltage-gated calcium channel activity; calcium ion binding; tight junction; voltage-gated calcium channel complex; membrane fraction; integral to membrane; membrane	CACNG2	0.46544	0.29543	-1.58996	0.00328	CACNG2	548.913	400.926	354.677	798.399	676.366	826.11	379.043	497.812	560.281	187.231	293.742	265.087	155.932	749.631
1390912	CAD	Homo sapiens carbamoyl-phosphate synthetase 2, aspartate transcarbamylase, and dihydroorotase (CAD), mRNA.	790	NM_004341.3	NP_004332.2	47458828	ILMN_1810992	7610253	S	6725	TCAACGAGATAAGCGTGGAAGTGGACTCGGATCCCCGCGCAGCCTACTTC	2	+	27319652-27319664:27319788-27319824						2p23.3a	CAD	All of the contents of a cell excluding the plasma membrane and nucleus, but including other subcellular structures [goid 5737] [evidence IEA]; That part of the cytoplasm that does not contain membranous or particulate subcellular components [goid 5829] [pmid 8619816] [evidence EXP]	The chemical reactions and pathways involving various organic and inorganic nitrogenous compounds; includes nitrogen fixation, nitrification, denitrification, assimilatory/dissimilatory nitrate reduction and the interconversion of nitrogenous organic matter and ammonium [goid 6807] [evidence IEA]; The chemical reactions and pathways resulting in the formation of pyrimidine bases, 1,3-diazine, org…	Catalysis of a reaction that results in the formation of carbamoyl phosphate [goid 4086] [evidence IEA]; Catalysis of the reaction: carbamoyl phosphate + L-aspartate = phosphate + N-carbamoyl-L-aspartate [goid 4070] [evidence IEA]; Catalysis of the reaction: 2 ATP + L-glutamine + CO2 + H2O = 2 ADP + phosphate + glutamate + carbamoyl phosphate [goid 4088] [pmid 8619816] [evidence TAS]; Catalysis o…			CAD	0006221; 0006807; 0006541; 0006526; 0009058; 0006520; 0006207; 0046872; 0016787; 0004151; 0004088; 0016740; 0016597; 0004070; 0005524; 0016874; 005737	pyrimidine nucleotide biosynthesis; nitrogen compound metabolism; glutamine metabolism; arginine biosynthesis; biosynthesis; amino acid metabolism; 'de novo' pyrimidine base biosynthesis; metal ion binding; hydrolase activity; dihydroorotase activity; carbamoyl-phosphate synthase (glutamine-hydrolyzing) activity; transferase activity; amino acid binding; aspartate carbamoyltransferase activity; A…	CAD	0.16663	0.25563	1.52017	0.00017	CAD	286.674	304.363	250.878	176.254	128.396	213.44	146.993	133.792	205.099	69.5389	272.272	410.553	340.173	328.02
1389186	CADM3	Homo sapiens cell adhesion molecule 3 (CADM3), mRNA.	57863	NM_021189.2	NP_067012.1	21361882	ILMN_1701827	520671	S	2213	GCCCTTTCCATAGGAACTGCCCTTGGAGATAGCAGAGTGTGGCTGCCCCT	1	+	157438114-157438163						1q23.2a	CADM3	The membrane surrounding a cell that separates the cell from its external environment. It consists of a phospholipid bilayer and associated proteins [goid 5886] [evidence IEA]; A specialized region of connection between two cells including but not limited to gap junctions, desmosomes, and tight junctions, but excluding direct cytoplasmic junctions such as ring canals [goid 5911] [pmid 12826663] […	The attachment of a cell, either to another cell or to an underlying substrate such as the extracellular matrix, via cell adhesion molecules [goid 7155] [evidence IEA]; The attachment of an adhesion molecule in one cell to an identical molecule in an adjacent cell [goid 7156] [pmid 12826663] [evidence ISS]; The attachment of an adhesion molecule in one cell to a nonidentical adhesion molecule in …	Interacting selectively with calcium ions (Ca2+) [goid 5509] [evidence IEA]; Interacting selectively with any protein or protein complex (a complex of two or more proteins that may include other nonprotein molecules) [goid 5515] [pmid 12826663] [evidence ISS]; Interacting selectively with an identical protein to form a homodimer [goid 42803] [pmid 12826663] [evidence ISS]	synCAM3; Necl-1; FLJ10698; BIgR; NECL1; IGSF4B; TSLL1	synCAM3; Necl-1; FLJ10698; BIgR; NECL1; IGSF4B; TSLL1	IGSF4B	4872	receptor activity	CADM3	1.21545	0.7914	-1.54996	0.00066	CADM3	972.56	1474.29	839.981	1540.29	1909.1	1873.48	1726.79	1645.74	1497.78	395.617	458.502	519.18	838.216	1182.13
1390219	CADPS	Homo sapiens Ca2+-dependent secretion activator (CADPS), transcript variant 2, mRNA.	8618	NM_183394.1	NP_899631.1	34452712	ILMN_1665547	5870086	A	4932	CCACGGCAAGGGGGCGATCCTATCATGACTTAACATCAAGCGCGCAGTTC	3	-	62359434-62359483	450537	I	2939	GAGAGAAATGTATGAGCATCCTGTCTTCTGCTTGGCCTCCCAAGTGATGG	62474364-62474413	3p14.2b-p14.2a	CADPS	That part of the cytoplasm that does not contain membranous or particulate subcellular components [goid 5829] [pmid 1516133] [evidence TAS]; Double layer of lipid molecules that encloses all cells, and, in eukaryotes, many organelles; may be a single or double lipid bilayer; also includes associated proteins [goid 16020] [evidence IEA]; A specialized region of connection between two cells or betw…	A process of secretion by a cell that results in the release of intracellular molecules (e.g. hormones, matrix proteins) contained within a membrane-bounded vesicle by fusion of the vesicle with the plasma membrane of a cell. This is the process whereby most molecules are secreted from eukaryotic cells [goid 6887] [pmid 1516133] [evidence TAS]; The directed movement of proteins into, out of, with…	Interacting selectively with calcium ions (Ca2+) [goid 5509] [evidence IEA]; Interacting selectively with a lipid [goid 8289] [evidence IEA]	KIAA1121; CAPS; CAPS1	KIAA1121; CAPS; CAPS1	CADPS	0006887; 0005829	exocytosis; cytosol	CADPS	2.49819	1.21319	-2.07815	0.00349	CADPS	3752.88	2650.09	689.467	4144.46	6097.15	3895.25	2099.12	1929.72	3157.27	1668.65	896.156	374.474	128.819	2429.31
1390148	CADPS	Homo sapiens Ca2+-dependent secretion activator (CADPS), transcript variant 1, mRNA.	8618	NM_003716.2	NP_003707.2	34452714	ILMN_1688188	7100131	I	3456	CCTCTAGGCATCCCACAAATGCCTACTTTTTCGGCACCGTCATGGATGGC	3	-	62442455-62442504						3p14.2b-p14.2a	CADPS	That part of the cytoplasm that does not contain membranous or particulate subcellular components [goid 5829] [pmid 1516133] [evidence TAS]; Double layer of lipid molecules that encloses all cells, and, in eukaryotes, many organelles; may be a single or double lipid bilayer; also includes associated proteins [goid 16020] [evidence IEA]; A specialized region of connection between two cells or betw…	A process of secretion by a cell that results in the release of intracellular molecules (e.g. hormones, matrix proteins) contained within a membrane-bounded vesicle by fusion of the vesicle with the plasma membrane of a cell. This is the process whereby most molecules are secreted from eukaryotic cells [goid 6887] [pmid 1516133] [evidence TAS]; The directed movement of proteins into, out of, with…	Interacting selectively with calcium ions (Ca2+) [goid 5509] [evidence IEA]; Interacting selectively with a lipid [goid 8289] [evidence IEA]	KIAA1121; CAPS; CAPS1	KIAA1121; CAPS; CAPS1	CADPS	0006887; 0005829	exocytosis; cytosol	CADPS	0.40264	0.14476	-2.80705	0.00036	CADPS	730.993	530.331	139.904	496.286	1077.89	259.644	347.946	326.552	488.694	299.493	115.855	33.6875	41.9609	226.568
1389460	CADPS2	Homo sapiens Ca2+-dependent activator protein for secretion 2 (CADPS2), transcript variant 1, mRNA.	93664	NM_017954.8	NP_060424.8	57546903	ILMN_1684461	4210273	A	4586	CCCCAGGTGTGGGGTAGCAAGTGTGCTTCCGTCAAGATACCATATTCTCC	7	-	121746734-121746783	2810128	I	2919	CGCCAACAGTCTTCCCAATGTAGCTCTTCCAAAAGTTCCAAGTCTGCCTC	121820549-121820598	7q31.32a-q31.32b	CADPS2	Double layer of lipid molecules that encloses all cells, and, in eukaryotes, many organelles; may be a single or double lipid bilayer; also includes associated proteins [goid 16020] [evidence IEA]; A specialized region of connection between two cells or between a cell and the extracellular matrix [goid 30054] [evidence IEA]; The lipid bilayer surrounding a cytoplasmic vesicle [goid 30659] [eviden…	A process of secretion by a cell that results in the release of intracellular molecules (e.g. hormones, matrix proteins) contained within a membrane-bounded vesicle by fusion of the vesicle with the plasma membrane of a cell. This is the process whereby most molecules are secreted from eukaryotic cells [goid 6887] [evidence IEA]; The directed movement of proteins into, out of, within or between c…	Interacting selectively with calcium ions (Ca2+) [goid 5509] [evidence IEA]; Interacting selectively with a lipid [goid 8289] [evidence IEA]	FLJ40851	KIAA1591; FLJ40851	CADPS2	0016567; 0004842; 0046872; 0003676; 0008270; 0005515; 00151	protein ubiquitination; ubiquitin-protein ligase activity; metal ion binding; nucleic acid binding; zinc ion binding; protein binding; ubiquitin ligase complex	CADPS2	2.21157	0.87018	-2.56489	5e-05	CADPS2	2881.9	1661.23	969.089	2852.97	5931.68	3490.56	2351.55	2365.73	2813.09	1479.92	598.358	691.288	333.879	624.498
1389518	CALHM2	Homo sapiens calcium homeostasis modulator 2 (CALHM2), mRNA.	51063	NM_015916.3	NP_057000.2	39725697	ILMN_1766200	7650719	S	1602	CTTCTTGGCCAGGGGAAAGGACCACAAGGCAATCTGGGGTGTGGACAGAC	10	-	105196743-105196792						10q24.33a	CALHM2						FAM26B	16021	integral to membrane	CALHM2	0.08541	0.14596	1.69344	1.43386e-07	CALHM2	118.141	160.041	91.9104	119.714	99.1625	83.5771	79.5163	87.9803	105.005	26.7853	142.032	219.153	189.866	158.151
1396701	CALML4	Homo sapiens calmodulin-like 4 (CALML4), transcript variant 1, mRNA.	91860	NM_001031733.1	NP_001026903.1	72534759	ILMN_1652389	2940475	A	488	GACGGGACTATTGAAGGAGGAGAATGGGAGAGCCTCCCCTGGGCCTGAAA	15	-	66273370-66273406:66273407-66273419	2370037	I	343	ATGGCGTCCGACCTGCGGTCAAAACTCACGAGTCTGGGGGAGAAGCTCAC	66276842-66276891	15q23a	CALML4			Interacting selectively with calcium ions (Ca2+) [goid 5509] [evidence IEA]	NY-BR-20; MGC4809	NY-BR-20; MGC4809	CALML4	0007517; 0005509; 0003774; 0016459	muscle development; calcium ion binding; motor activity; myosin	CALML4	0.15145	0.23151	1.51461	0.00206	CALML4	206.753	243.045	174.785	125.102	215.004	116.307	220.372	163.869	183.155	46.0184	222.692	232.779	385.094	341.112
1377939	CAMK2B	Homo sapiens calcium/calmodulin-dependent protein kinase (CaM kinase) II beta (CAMK2B), transcript variant 4, mRNA.	816	NM_172080.1	NP_742077.1	26051209	ILMN_1694997	3370594	A	1827	TGCCTGTCGCATGTTTGTGTCTGCCTCGTTCCCTCCCCTGGTGCCTGTGT	7	-	44225530-44225579						7p13d	CAMK2B		The process of introducing a phosphate group on to a protein [goid 6468] [evidence IEA]; Progression from G1 phase to S phase of the mitotic cell cycle [goid 82] [evidence IEA]; The directed movement of calcium (Ca) ions into, out of, within or between cells [goid 6816] [evidence IEA]; The cascade of processes by which a signal interacts with a receptor, causing a change in the level or activity …	Interacting selectively with a nucleotide, any compound consisting of a nucleoside that is esterified with (ortho)phosphate or an oligophosphate at any hydroxyl group on the ribose or deoxyribose moiety [goid 166] [evidence IEA]; Catalysis of the reaction: ATP + a protein serine/threonine = ADP + protein serine/threonine phosphate, dependent on the presence of calcium-bound calmodulin [goid 4683]…	CAMKB; CAM2; MGC29528; CAMK2	CAMKB; CAM2; MGC29528; CAMK2	CAMK2B	0007165; 0006468; 000166; 0004685; 0005516; 0016740; 0004674; 0005524; 004713	signal transduction; protein amino acid phosphorylation; nucleotide binding; calcium- and calmodulin-dependent protein kinase activity; calmodulin binding; transferase activity; protein serine/threonine kinase activity; ATP binding; protein-tyrosine kinase activity	CAMK2B	4.74769	3.13542	-1.52815	0.00051	CAMK2B	3752.42	3753.49	5395.19	6587.73	7430.69	8825.16	7230.78	7153.75	6266.15	1817.27	2448.44	2961.21	3161.89	6124.96
1390012	CAMK2D	Homo sapiens calcium/calmodulin-dependent protein kinase (CaM kinase) II delta (CAMK2D), transcript variant 3, mRNA.	817	NM_001221.2	NP_001212.2	26667179	ILMN_1658818	2470753	I	1971	CTCAGGAGGCACCTCTTTGTGGCAAAACATCTAAGGCCTGAAAACCATTC	4	-	114596343-114596359:114596360-114596392						4q26a	CAMK2D	An enzyme complex which in eukaryotes is composed of four different chains: alpha, beta, gamma, and delta. The different isoforms assemble into homo- or heteromultimeric holoenzymes composed of 8 to 12 subunits. Catalyzes the phosphorylation of proteins to O-phosphoproteins [goid 5954] [pmid 11264466] [evidence TAS]	The process of introducing a phosphate group on to a protein [goid 6468] [evidence IEA]; The process of introducing a phosphate group on to a protein [goid 6468] [evidence IEA]; Any process that modulates the frequency, rate or extent of cell growth [goid 1558] [pmid 9060999] [evidence NAS]; The process of introducing a phosphate group on to a protein [goid 6468] [evidence NAS]	Interacting selectively with a nucleotide, any compound consisting of a nucleoside that is esterified with (ortho)phosphate or an oligophosphate at any hydroxyl group on the ribose or deoxyribose moiety [goid 166] [evidence IEA]; Catalysis of the reaction: ATP + a protein serine/threonine = ADP + protein serine/threonine phosphate, dependent on the presence of calcium-bound calmodulin [goid 4683]…	MGC44911; CAMKD	MGC44911; CAMKD	CAMK2D	0001558; 0006468; 000166; 0004685; 0005516; 0016740; 0004674; 0005524; 0005954	regulation of cell growth; protein amino acid phosphorylation; nucleotide binding; calcium- and calmodulin-dependent protein kinase activity; calmodulin binding; transferase activity; protein serine/threonine kinase activity; ATP binding; calcium- and calmodulin-dependent protein kinase complex	CAMK2D	0.20081	0.12068	-1.67931	0.00128	CAMK2D	288.704	147.959	136.232	243.684	288.167	384.37	202.077	230.881	240.259	81.3357	94.336	66.6919	65.7207	178.459
1376932	CAMK2D	Homo sapiens calcium/calmodulin-dependent protein kinase (CaM kinase) II delta (CAMK2D), transcript variant 4, mRNA.	817	NM_172115.1	NP_742113.1	26667182	ILMN_1683415	1260053	A	1828	GGAATGCCAAAGACAATGCAGTCAGAAGAGACTCGTGTGTGGCACCGCCG	4	-	114597999-114598048	2100411	I	2033	ACGCTAGTAGTTGGTTACACTGATGAAAATAAATGCCTTCACGGGAAAGG	114597794-114597843	4q26a	CAMK2D	An enzyme complex which in eukaryotes is composed of four different chains: alpha, beta, gamma, and delta. The different isoforms assemble into homo- or heteromultimeric holoenzymes composed of 8 to 12 subunits. Catalyzes the phosphorylation of proteins to O-phosphoproteins [goid 5954] [pmid 11264466] [evidence TAS]	The process of introducing a phosphate group on to a protein [goid 6468] [evidence IEA]; The process of introducing a phosphate group on to a protein [goid 6468] [evidence IEA]; Any process that modulates the frequency, rate or extent of cell growth [goid 1558] [pmid 9060999] [evidence NAS]; The process of introducing a phosphate group on to a protein [goid 6468] [evidence NAS]	Interacting selectively with a nucleotide, any compound consisting of a nucleoside that is esterified with (ortho)phosphate or an oligophosphate at any hydroxyl group on the ribose or deoxyribose moiety [goid 166] [evidence IEA]; Catalysis of the reaction: ATP + a protein serine/threonine = ADP + protein serine/threonine phosphate, dependent on the presence of calcium-bound calmodulin [goid 4683]…	MGC44911; CAMKD	MGC44911; CAMKD	CAMK2D	0001558; 0006468; 000166; 0004685; 0005516; 0016740; 0004674; 0005524; 0005954	regulation of cell growth; protein amino acid phosphorylation; nucleotide binding; calcium- and calmodulin-dependent protein kinase activity; calmodulin binding; transferase activity; protein serine/threonine kinase activity; ATP binding; calcium- and calmodulin-dependent protein kinase complex	CAMK2D	0.41752	0.23782	-1.77179	0.00025	CAMK2D	424.284	286.179	397.453	473.124	791.793	813.86	398.174	417.4	500.283	194.03	235.123	196.158	224.051	297.842
1394695	CAMKV	Homo sapiens CaM kinase-like vesicle-associated (CAMKV), mRNA.	79012	NM_024046.2	NP_076951.1	34147351	ILMN_1667381	4610619	S	2888	TCCCTGCATGCCTGTGGGTCTGCTCTGGTGTGTGAAGGTCGGTGGGTTAA	3	-	49870471-49870520						3p21.31c	CAMKV	A membrane-bounded organelle of eukaryotic cells in which chromosomes are housed and replicated. In most cells, the nucleus contains all of the cell's chromosomes except the organellar chromosomes, and is the site of RNA synthesis and processing. In some species, or in specialized cell types, RNA metabolism or DNA replication may be absent [goid 5634] [pmid 18029348] [evidence IDA]; A small, dens…	The process of introducing a phosphate group on to a protein [goid 6468] [evidence IEA]	Catalysis of the reaction: ATP + a protein serine/threonine = ADP + protein serine/threonine phosphate [goid 4674] [evidence IEA]; Interacting selectively with ATP, adenosine 5'-triphosphate, a universally important coenzyme and enzyme regulator [goid 5524] [evidence IEA]	VACAMKL; MGC8407; 1G5	VACAMKL; MGC8407; 1G5	CAMKV	0006468; 0004674; 0005524; 0004713	protein amino acid phosphorylation; protein serine/threonine kinase activity; ATP binding; protein-tyrosine kinase activity	CAMKV	2.32561	1.34102	-1.75018	0.00348	CAMKV	3307.89	1673.86	1413.71	4027.78	4711.23	3942.33	2086.8	2389.17	2944.1	1220.33	1020.55	1632.66	279.056	3309.54
1383918	CAP2	Homo sapiens CAP, adenylate cyclase-associated protein, 2 (yeast) (CAP2), mRNA.	10486	NM_006366.2	NP_006357.1	41327719	ILMN_1691237	3840563	S	2786	GCTTGCAGGCCCAGTACAAGCATATATATTGTGCCTCTTACAGCCTTTGG	6	+	17665761-17665810						6p22.3e	CAP2	The membrane surrounding a cell that separates the cell from its external environment. It consists of a phospholipid bilayer and associated proteins [goid 5886] [evidence IEA]	A process that is carried out at the cellular level which results in the formation, arrangement of constituent parts, or disassembly of cytoskeletal structures [goid 7010] [evidence IEA]; Any cellular process that results in the specification, formation or maintenance of anisotropic intracellular organization or cell growth patterns [goid 7163] [pmid 7962207] [evidence TAS]; The cascade of proces…	Interacting selectively with monomeric or multimeric forms of actin, including actin filaments [goid 3779] [evidence IEA]; The selective, often stoichiometric, interaction of a molecule with one or more specific sites on another molecule [goid 5488] [evidence IEA]; Catalysis of an oxidation-reduction (redox) reaction, a reversible chemical reaction in which the oxidation state of an atom or atoms…			CAP2	0007163; 0007165; 0007190; 0016020	establishment and/or maintenance of cell polarity; signal transduction; adenylate cyclase activation; membrane	CAP2	3.89442	2.51288	-1.56405	0.00286	CAP2	5221.96	4562.23	1621.57	5857.94	7205.98	5413.08	4716.34	5392.34	4998.93	1588.44	2212.62	1796.38	1981.24	5187.94
1392100	CAPN3	Homo sapiens calpain 3, (p94) (CAPN3), transcript variant 1, mRNA.	825	NM_000070.2	NP_000061.1	27765081	ILMN_1687971	1230521	A	2989	CAAACCCTTGTCCCTTTGCCATGTGGAGGAAAGTGCCTGCCTCTGGTCCG	15	+	40491480-40491529						15q15.1d	CAPN3	The living contents of a cell; the matter contained within (but not including) the plasma membrane, usually taken to exclude large vacuoles and masses of secretory or ingested material. In eukaryotes it includes the nucleus and cytoplasm [goid 5622] [evidence IEA]; The living contents of a cell; the matter contained within (but not including) the plasma membrane, usually taken to exclude large va…	The hydrolysis of a peptide bond or bonds within a protein [goid 6508] [evidence IEA]; The hydrolysis of a peptide bond or bonds within a protein [goid 6508] [evidence IEA]; The myofibril assembly process by which the muscle actomyosin is organized into sarcomeres. The sarcomere is the repeating unit of a myofibril in a muscle cell, composed of an array of overlapping thick and thin filaments bet…	Interacting selectively with calcium ions (Ca2+) [goid 5509] [evidence IEA]; Catalysis of the hydrolysis of nonterminal peptide bonds in a polypeptide chain by a mechanism using a cysteine residue at the enzyme active center, and requiring the presence of calcium [goid 4198] [evidence IEA]; Catalysis of the hydrolysis of nonterminal peptide bonds in a polypeptide chain by a mechanism using a cyst…	MGC11121; CANP3; MGC4403; MGC14344; LGMD2A; p94; nCL-1; LGMD2; MGC10767; CANPL3	MGC11121; CANP3; MGC4403; MGC14344; LGMD2A; p94; nCL-1; LGMD2; MGC10767; CANPL3	CAPN3	0006508; 0007517; 0005509; 0004198; 0004871; 0005622	proteolysis and peptidolysis; muscle development; calcium ion binding; calpain activity; signal transducer activity; intracellular	CAPN3	4.54792	7.12736	1.55287	0.00411	CAPN3	5369.58	5772.05	10099.6	9021.28	2453.85	3697.3	5152.8	4867.07	5804.19	2562.26	9108.98	12784.4	12013.7	8169.86
1382972	CARD10	Homo sapiens caspase recruitment domain family, member 10 (CARD10), mRNA.	29775	NM_014550.3	NP_055365.2	51093860	ILMN_1743714	6250162	S	3639	CCTCACATGGGTGTCTGTGGTTCTCTCCTGTGTAAATGTCACGCCCCACC	22	-	36216556-36216605						22q13.1a	CARD10	The living contents of a cell; the matter contained within (but not including) the plasma membrane, usually taken to exclude large vacuoles and masses of secretory or ingested material. In eukaryotes it includes the nucleus and cytoplasm [goid 5622] [evidence IEA]; All of the contents of a cell excluding the plasma membrane and nucleus, but including other subcellular structures [goid 5737] [pmid…	The aggregation, arrangement and bonding together of a set of components to form a protein complex [goid 6461] [pmid 11259443] [evidence NAS]; The stimulation of the activity of NF-kappaB-inducing kinase through phosphorylation at specific residues [goid 7250] [pmid 11259443] [evidence IDA]; Any process that modulates the occurrence or rate of cell death by apoptosis [goid 42981] [evidence IEA]; …	Interacting selectively with any protein or protein complex (a complex of two or more proteins that may include other nonprotein molecules) [goid 5515] [pmid 11259443] [evidence IPI]; Functions to provide a physical support for the assembly of a multiprotein receptor signaling complex [goid 30159] [pmid 11259443] [evidence NAS]; Interacting selectively with any protein or protein complex (a compl…	CARMA3; BIMP1; MGC142219	CARMA3; BIMP1; MGC142219	CARD10	0007250; 0006461; 0042981; 0005515; 0030159; 0005737	activation of NF-kappaB-inducing kinase; protein complex assembly; regulation of apoptosis; protein binding; receptor signaling complex scaffold activity; cytoplasm	CARD10	0.08636	0.22277	2.55604	1.71068e-09	CARD10	109.52	152.277	42.7783	116.41	106.446	104.417	119.101	94.8636	105.727	30.606	276.686	383.937	406.795	266.393
1394290	CARD6	Homo sapiens caspase recruitment domain family, member 6 (CARD6), mRNA.	84674	NM_032587.2	NP_115976.2	16554563	ILMN_1669925	3450121	S	3911	CTATGAGACAACCCCACTTGGAGAAGAATGGGGTTAGGGTCTCTAATTGC	5	+	40890903-40890952						5p13.1b	CARD6	The living contents of a cell; the matter contained within (but not including) the plasma membrane, usually taken to exclude large vacuoles and masses of secretory or ingested material. In eukaryotes it includes the nucleus and cytoplasm [goid 5622] [evidence IEA]	Any process that modulates the occurrence or rate of cell death by apoptosis [goid 42981] [evidence IEA]	Interacting selectively with any protein or protein complex (a complex of two or more proteins that may include other nonprotein molecules) [goid 5515] [evidence IEA]	CINCIN1	CINCIN1	CARD6	0042981; 0005515; 0005622	regulation of apoptosis; protein binding; intracellular	CARD6	0.06691	0.12133	1.79677	1.48438e-06	CARD6	122.429	108.432	82.6194	64.4033	54.9296	83.3319	62.3341	72.8033	81.4103	23.4409	135.775	208.859	120.417	137.189
1387686	CARD9	Homo sapiens caspase recruitment domain family, member 9 (CARD9), mRNA.	64170	NM_052813.2	NP_434700.2	47717130	ILMN_1712532	5870093	S	1959	GTGCTCACCACCCCCATGCACACGCCATCTGTGTAACTTCAGGATCTGTT	9	-	138378318-138378367						9q34.3d	CARD9	The living contents of a cell; the matter contained within (but not including) the plasma membrane, usually taken to exclude large vacuoles and masses of secretory or ingested material. In eukaryotes it includes the nucleus and cytoplasm [goid 5622] [evidence IEA]; All of the contents of a cell excluding the plasma membrane and nucleus, but including other subcellular structures [goid 5737] [pmid…	A change in state or activity of a cell or an organism (in terms of movement, secretion, enzyme production, gene expression, etc.) as a result of a stimulus from a fungus [goid 9620] [evidence IEA]; A change in state or activity of an organism (in terms of movement, secretion, enzyme production, gene expression, etc.) as a result of a muramyl dipeptide stimulus. Muramyl dipeptide is derived from …	Interacting selectively with any protein or protein complex (a complex of two or more proteins that may include other nonprotein molecules) [goid 5515] [evidence IEA]; Interacting selectively with an identical protein to form a homodimer [goid 42803] [pmid 11053425] [evidence IPI]; Interacting selectively with a CARD (N-terminal caspase recruitment) domain, a protein-protein interaction domain th…	hCARD9	hCARD9	CARD9	0042981; 0005515; 0005622	regulation of apoptosis; protein binding; intracellular	CARD9	0.24049	0.43493	1.79199	0.00597	CARD9	471.4	362.918	624.336	247.213	143.244	170.759	173.752	166.198	294.977	175.756	550.727	258.73	363.189	364.107
1391737	CASC2	Homo sapiens cancer susceptibility candidate 2 (CASC2), transcript variant 2, mRNA.	255082	NM_201377.1	NP_958779.1	41282244	ILMN_1808546	2690088	I	588	GCTTAACTTGCTGTTTAACCTTGGGCAAGCTGCCATCCCACACGAGGCCG	10	+	119957154-119957159:119957160-119957203						10q26.11b	CASC2				C10orf5		CASC2	0007264; 000166; 0005515; 0005525	small GTPase mediated signal transduction; nucleotide binding; protein binding; GTP binding	CASC2	0.18474	0.11288	-1.65161	0.00214	CASC2	147.119	190.477	175.905	184.851	127.26	307.699	299.466	327.476	220.032	78.8494	112.794	102.855	116.271	87.0696
1392229	CAV1	Homo sapiens caveolin 1, caveolae protein, 22kDa (CAV1), mRNA.	857	NM_001753.3	NP_001744.2	15451855	ILMN_1687583	2650754	S	2010	TGACACATGGCCCCTCCCCCTGCCAGGAGCTTTGGACCTAATCCAAGCAT	7	+	115987772-115987821						7q31.2b	CAV1	The lipid bilayer surrounding any of the compartments of the Golgi apparatus [goid 139] [pmid 14707126] [evidence EXP]; The lipid bilayer surrounding any of the compartments of the Golgi apparatus [goid 139] [pmid 11294831] [evidence IDA]; The irregular network of unit membranes, visible only by electron microscopy, that occurs in the cytoplasm of many eukaryotic cells. The membranes form a compl…	Any process that terminates the activity of the active enzyme MAP kinase [goid 188] [evidence ISS]; The differentiation of endothelial cells from progenitor cells during blood vessel development, and the de novo formation of blood vessels and tubes [goid 1570] [evidence ISS]; A change in state or activity of a cell or an organism (in terms of movement, secretion, enzyme production, gene expressio…	The action of a molecule that contributes to the structural integrity of a complex or assembly within or outside a cell [goid 5198] [pmid 11865038] [evidence IDA]; Interacting selectively with any protein or protein complex (a complex of two or more proteins that may include other nonprotein molecules) [goid 5515] [pmid 16951145] [evidence IPI]; Interacting selectively with cholesterol (cholest-5…	MSTP085; CAV; VIP21	MSTP085; CAV; VIP21	CAV1	0042632; 0030301; 0015485; 0005198; 0005515; 0016021; 0045121; 0016020; 0005783; 0005887; 0016599; 00139	cholesterol homeostasis; cholesterol transport; cholesterol binding; structural molecule activity; protein binding; integral to membrane; lipid raft; membrane; endoplasmic reticulum; integral to plasma membrane; caveolar membrane; Golgi membrane	CAV1	0.11559	0.19592	1.67954	0.00015	CAV1	193.789	176.204	130.84	216.062	70.1749	165.339	87.9084	98.7709	142.386	53.3971	315.164	197.034	216.985	173.915
1383515	CBLN1	Homo sapiens cerebellin 1 precursor (CBLN1), mRNA.	869	NM_004352.1	NP_004343.1	4757921	ILMN_1712461	2640170	S	1460	ATCCTCGGCTGCTTGTTAGCAGAGAAAGGACTCACCTTAGTGGTGACTGG	16	-	47870204-47870253						16q12.1b	CBLN1	The space external to the outermost structure of a cell. For cells without external protective or external encapsulating structures this refers to space outside of the plasma membrane. This term covers the host cell environment outside an intracellular parasite [goid 5576] [evidence IEA]; Double layer of lipid molecules that encloses all cells, and, in eukaryotes, many organelles; may be a single…	The process of communication from a neuron to a target (neuron, muscle, or secretory cell) across a synapse [goid 7268] [pmid 1704129] [evidence TAS]; The process whose specific outcome is the progression of nervous tissue over time, from its formation to its mature state [goid 7399] [pmid 1704129] [evidence TAS]				CBLN1	0007268; 0007399; 0019717; 0016020	synaptic transmission; neurogenesis; synaptosome; membrane	CBLN1	1.39644	0.48658	-2.89631	0.0048	CBLN1	2080.59	835.895	358.56	1799.65	4671.54	2091.49	1187.34	1099.47	1765.57	1324.13	347.768	95.2856	73.2244	477.802
1380527	CBS	Homo sapiens cystathionine-beta-synthase (CBS), mRNA.	875	NM_000071.1	NP_000062.1	4557414	ILMN_1804735	5810164	S	2420	CTCCCGTCTTCCTCCTCCCCTGGCAACTGCTGATCGACTTTGTGTCTCTG	21	-	43346416-43346465						21q22.3c	CBS	A membrane-bounded organelle of eukaryotic cells in which chromosomes are housed and replicated. In most cells, the nucleus contains all of the cell's chromosomes except the organellar chromosomes, and is the site of RNA synthesis and processing. In some species, or in specialized cell types, RNA metabolism or DNA replication may be absent [goid 5634] [evidence IEA]; A small, dense body one or mo…	The chemical reactions and pathways resulting in the formation of cysteine from other compounds, including serine [goid 6535] [evidence IEA]; The chemical reactions and pathways, including anabolism and catabolism, by which living organisms transform chemical substances. Metabolic processes typically transform small molecules, but also include macromolecular processes such as DNA repair and repli…	Catalysis of the reaction: L-serine + L-homocysteine = cystathionine + H2O [goid 4122] [pmid 9590298] [evidence TAS]; Interacting selectively with iron (Fe) ions [goid 5506] [evidence IEA]; Catalysis of the cleavage of C-C, C-O, C-N and other bonds by other means than by hydrolysis or oxidation, or conversely adding a group to a double bond. They differ from other enzymes in that two substrates a…	HIP4	HIP4	CBS	0008152; 0019343; 0008652; 0006535; 0046872; 0004122; 0016829; 0005506; 005737	metabolism; cysteine biosynthesis via cystathione; amino acid biosynthesis; cysteine biosynthesis from serine; metal ion binding; cystathionine beta-synthase activity; lyase activity; iron ion binding; cytoplasm	CBS	2.3072	3.54669	1.52321	1.14377e-06	CBS	2861.66	2407.52	3616.87	2601.43	2129.45	3687.47	2769.22	3113.89	2898.44	550.811	4068.19	3664.09	5586.16	3293.17
1383129	CBX2	Homo sapiens chromobox homolog 2 (Pc class homolog, Drosophila) (CBX2), transcript variant 1, mRNA.	84733	NM_005189.1	NP_005180.1	61743962	ILMN_1770678	6330400	I	4042	TTGTGTGTTTTTCCTGGTGCTTCAAGAGCGTGTGCAGGGCAAGTGCCGTC	17	+	75375837-75375886						17q25.3d	CBX2	The ordered and organized complex of DNA and protein that forms the chromosome [goid 785] [evidence IEA]; A membrane-bounded organelle of eukaryotic cells in which chromosomes are housed and replicated. In most cells, the nucleus contains all of the cell's chromosomes except the organellar chromosomes, and is the site of RNA synthesis and processing. In some species, or in specialized cell types,…	Any process that stops, prevents or reduces the frequency, rate or extent of transcription from an RNA polymerase II promoter [goid 122] [evidence IEA]; The formation or destruction of chromatin structures [goid 6333] [evidence IEA]; Any process that modulates the frequency, rate or extent of DNA-dependent transcription [goid 6355] [evidence IEA]; Any process that stops, prevents or reduces the f…	Interacting selectively with DNA (deoxyribonucleic acid) [goid 3677] [evidence IEA]; Interacting selectively with chromatin, the network of fibers of DNA and protein that make up the chromosomes of the eukaryotic nucleus during interphase [goid 3682] [evidence IEA]; Interacting selectively with any protein or protein complex (a complex of two or more proteins that may include other nonprotein mol…	M33; CDCA6; MGC10561	M33; CDCA6; MGC10561	CBX2	0006355; 0006350; 0016568; 0006333; 0016481; 0003677; 0003682; 0016564; 000785; 0005634	regulation of transcription DNA-dependent; transcription; chromatin modification; chromatin assembly or disassembly; negative regulation of transcription; DNA binding; chromatin binding; transcriptional repressor activity; chromatin; nucleus	CBX2	0.06657	0.14442	2.14976	3e-05	CBX2	61.5177	78.6566	56.3685	105.003	56.8468	83.7941	95.6403	99.7042	79.6914	19.6744	168.661	429.456	195.056	157.949
1380304	CCDC101	Homo sapiens coiled-coil domain containing 101 (CCDC101), mRNA.	112869	NM_138414.1	NP_612423.1	19923934	ILMN_1701477	5720300	I	819	CAGTGGAAGGCCAACCCGGAGACGGACCCTGAGGCCTTGTTCCAGAAGGA	16	+	28509634-28509683						16p11.2e	CCDC101	A membrane-bounded organelle of eukaryotic cells in which chromosomes are housed and replicated. In most cells, the nucleus contains all of the cell's chromosomes except the organellar chromosomes, and is the site of RNA synthesis and processing. In some species, or in specialized cell types, RNA metabolism or DNA replication may be absent [goid 5634] [evidence IEA]	The synthesis of either RNA on a template of DNA or DNA on a template of RNA [goid 6350] [evidence IEA]; Any process that modulates the frequency, rate or extent of DNA-dependent transcription [goid 6355] [evidence IEA]		FLJ32446	FLJ32446	LOC112869	0006810; 0007155; 0006915; 0008203; 0005515; 0004872; 0005215; 0005624; 0016021; 0005886	transport; cell adhesion; apoptosis; cholesterol metabolism; protein binding; receptor activity; transporter activity; membrane fraction; integral to membrane; plasma membrane	CCDC101	0.09008	0.15782	1.73612	0.00014	CCDC101	61.3925	126.997	187.432	91.8705	117.2	95.9705	109.883	79.0727	108.727	38.113	173.714	274.911	188.681	166.01
1386424	CCDC104	Homo sapiens coiled-coil domain containing 104 (CCDC104), mRNA.	112942	NM_080667.3	NP_542398.2	42476197	ILMN_1792456	450703	S	812	TTATCAGAGGCTAAAACAGAAGAGCCCACAGTGCATTCCAGTGAAGCTGC	2	+	55618124-55618173						2p16.1d	CCDC104				MGC15407	MGC15407	MGC15407	0006355; 0007049; 0006350; 0045786; 0003677; 0005634	regulation of transcription DNA-dependent; cell cycle; transcription; negative regulation of progression through cell cycle; DNA binding; nucleus	CCDC104	1.04173	0.6498	-1.61791	9e-05	CCDC104	1520.26	1195.35	795.514	1449.2	2111.5	893.222	1204.69	1059.63	1278.67	418.066	937.227	462.825	735.093	909.045
1383452	CCDC113	Homo sapiens coiled-coil domain containing 113 (CCDC113), mRNA.	29070	NM_014157.2	NP_054876.2	19923431	ILMN_1665810	4490047	S	5117	GATCCCCCACCTGGCAGAGGACCCAGTACAAAATAGGCACTCAATAGATG	16	+	56875109-56875158						16q21a	CCDC113	Any macromolecular complex composed of two or more polypeptide subunits, which may or may not be identical. Protein complexes may have other associated non-protein prosthetic groups, such as nucleotides, metal ions or carbohydrate groups [goid 43234] [pmid 11256614] [evidence IDA]			HSPC065; FLJ23555; DKFZP434N1418	HSPC065; FLJ23555; DKFZP434N1418	HSPC065	0006955; 0007155; 0005887; 0005886	immune response; cell adhesion; integral to plasma membrane; plasma membrane	CCDC113	0.79421	0.47955	-1.67138	4.52791e-07	CCDC113	745.256	679.449	895.711	1064	1076.3	999.645	1068.06	1239.04	970.933	186.492	589.17	514.837	800.055	523.369
1393812	CCDC142	Homo sapiens coiled-coil domain containing 142 (CCDC142), mRNA.	84865	NM_032779.2	NP_116168.2	31377647	ILMN_1714936	870152	S	2487	GGAAGCTTGGAGGAAAGCATACTGGAGAATAAGCTACAAAGAGCCTGGGC	2	-	74555035-74555084						2p13.1b	CCDC142				FLJ14397	FLJ14397	FLJ14397	0008298; 0006396; 0009653; 0005200; 0005856; 0005795	intracellular mRNA localization; RNA processing; morphogenesis; structural constituent of cytoskeleton; cytoskeleton; Golgi stack	CCDC142	0.04401	0.07397	1.66552	1.35566e-06	CCDC142	60.4122	81.9985	41.9516	39.3135	49.7271	49.5509	39.8133	41.392	50.5199	14.5763	49.2586	97.6352	99.4033	104.181
1394822	CCDC148	Homo sapiens coiled-coil domain containing 148 (CCDC148), mRNA.	130940	NM_138803.2	NP_620158.2	31377610	ILMN_1663816	7570296	S	1718	GAGAGCACGGCGGCTAGAAGCCCTTAGGAAACAGGTTGCTGTTGTTGCTC	2	-	158741403-158741419:158743637-158743669						2q24.1e	CCDC148				MGC125590; MGC125588	MGC125590; MGC125588	LOC130940	0006355; 0006350; 0046872; 0042802; 0008270; 0003677; 005634	regulation of transcription DNA-dependent; transcription; metal ion binding; protein self binding; zinc ion binding; DNA binding; nucleus	CCDC148	0.11879	0.07516	-1.59497	0.00104	CCDC148	153.524	135.602	131.289	156.981	118.302	108.483	168.441	180.309	144.117	24.8675	191.061	38.9105	75.4388	80.7178
1382831	CCDC21	Homo sapiens coiled-coil domain containing 21 (CCDC21), mRNA.	64793	NM_022778.2	NP_073615.2	40538793	ILMN_1812489	450189	S	3761	TGCTTAAAGGCAGAGCCGCCTGGTTGGTCTCCACCCTGTGCATTGGGAGC	1	+	26477712-26477761						1p36.11b	CCDC21				FLJ22000; FLJ13976; DKFZP434L0117; DKFZp434P232	FLJ22000; FLJ13976; DKFZP434L0117; DKFZp434P232	CCDC21	4872	receptor activity	CCDC21	0.22508	0.43735	1.92534	8.37485e-06	CCDC21	448.735	369.293	296.681	283.859	270.306	266.096	94.4923	163.733	274.15	109.989	855.805	631.676	745.205	556.074
1396432	CCDC4	Homo sapiens coiled-coil domain containing 4 (CCDC4), mRNA.	389206	NM_207406.1	NP_997289.1	46409435	ILMN_1740094	1940072	A	1074	AAGGAAAAGGTCAGTGCAGTCAGGAGAGACAGGTCCCGAAAGACGCCCTC	4	-	41816857-41816906	1440452	I	2735	GGCCACAATGCGTGGACCTCCATCCCGCTTTTGGTTGGGAAATACGTAGG	41815196-41815245	4p13d	CCDC4				FLJ35632; FLJ43965	MGC157807; FLJ35632; MGC157808; FLJ43965	CCDC4	0006974; 0008283; 0050847; 0006511; 0006512; 0005515; 0004842; 0004840; 0016874; 0005625; 0005634	response to DNA damage stimulus; cell proliferation; progesterone receptor signaling pathway; ubiquitin-dependent protein catabolism; ubiquitin cycle; protein binding; ubiquitin-protein ligase activity; ubiquitin conjugating enzyme activity; ligase activity; soluble fraction; nucleus	CCDC4	0.08048	0.03559	-2.28203	0.0082	CCDC4	76.3495	46.3757	36.5568	72.2704	253.413	110.595	81.6839	77.8395	94.3855	68.0872	17.7022	27.1581	20.8444	17.0231
1379231	CCDC84	Homo sapiens coiled-coil domain containing 84 (CCDC84), mRNA.	338657	NM_198489.1	NP_940891.1	38348291	ILMN_1709227	7320678	S	906	GCCAACTTTGATCACAGCTCCAGGACCAGTGCAGGCTGGCTGCCCTCTTT	11	+	118391271-118391320						11q23.3e	CCDC84				DLNB14	DLNB14	DLNB14	0007189; 0007165; 0007565; 0007186; 0009306; 000166; 0004871; 0003924; 0019001; 0005525; 0005834; 0005576; 005886	G-protein signaling adenylate cyclase activating pathway; signal transduction; pregnancy; G-protein coupled receptor protein signaling pathway; protein secretion; nucleotide binding; signal transducer activity; GTPase activity; guanyl nucleotide binding; GTP binding; heterotrimeric G-protein complex; extracellular region; plasma membrane	CCDC84	0.55472	0.90295	1.6129	6.64935e-07	CCDC84	947.41	912.69	637.865	744.571	540.545	717.908	449.122	407.284	669.674	199.753	1308.54	1387.1	1171.79	1236.83
1384020	CCRN4L	Homo sapiens CCR4 carbon catabolite repression 4-like (S. cerevisiae) (CCRN4L), mRNA.	25819	NM_012118.2	NP_036250.2	31083027	ILMN_1689378	4480482	S	1861	TCATTTTCTGCGTTTCCAGCATGCCCTTGGAAAAGACTCCCTTTAGTCCC	4	+	140186450-140186499						4q31.1b	CCRN4L	A membrane-bounded organelle of eukaryotic cells in which chromosomes are housed and replicated. In most cells, the nucleus contains all of the cell's chromosomes except the organellar chromosomes, and is the site of RNA synthesis and processing. In some species, or in specialized cell types, RNA metabolism or DNA replication may be absent [goid 5634] [pmid 10521507] [evidence TAS]	The synthesis of RNA from a DNA template by RNA polymerase II (Pol II), originating at a Pol II-specific promoter. Includes transcription of messenger RNA (mRNA) and certain small nuclear RNAs (snRNAs) [goid 6366] [pmid 10521507] [evidence TAS]; Any process pertinent to the generation and maintenance of rhythms in the physiology of an organism [goid 48511] [evidence IEA]	The function of binding to a specific DNA sequence in order to modulate transcription. The transcription factor may or may not also interact selectively with a protein or macromolecular complex [goid 3700] [pmid 10521507] [evidence TAS]	CCR4L; MGC142060; MGC142054; MGC4120817; MGC78549; NOC	CCR4L; MGC142060; MGC142054; MGC4120817; MGC78549; NOC	CCRN4L	0006366; 0048511; 0003700; 0005634	transcription from RNA polymerase II promoter; rhythmic process; transcription factor activity; nucleus	CCRN4L	0.44164	0.18935	-2.35387	8.04674e-07	CCRN4L	308.119	297.143	706.768	398.482	722.617	446.049	675.489	702.809	532.184	187.898	243.483	174.785	98.086	181.525
1396125	CD22	Homo sapiens CD22 molecule (CD22), mRNA.	933	NM_001771.1	NP_001762.1	4502650	ILMN_1792075	6450743	S	2973	CTCTGGCCCTCTACCCCTGATCTGACATCCCCACTCACGAATATTATGCC	19	+	40529826-40529875						19q13.12a	CD22	Double layer of lipid molecules that encloses all cells, and, in eukaryotes, many organelles; may be a single or double lipid bilayer; also includes associated proteins [goid 16020] [evidence IEA]; Penetrating at least one phospholipid bilayer of a membrane. May also refer to the state of being buried in the bilayer with no exposure outside the bilayer. When used to describe a protein, indicates …	Any immune system process that functions in the calibrated response of an organism to a potential internal or invasive threat [goid 6955] [pmid 8496602] [evidence TAS]; The attachment of one cell to another cell via adhesion molecules [goid 16337] [evidence IEA]	Interacting selectively with any protein or protein complex (a complex of two or more proteins that may include other nonprotein molecules) [goid 5515] [pmid 8647200] [evidence IPI]; Interacting selectively with any protein or protein complex (a complex of two or more proteins that may include other nonprotein molecules) [goid 5515] [pmid 8627166] [evidence IPI]; Interacting selectively with any …	SIGLEC-2; MGC130020; SIGLEC2	SIGLEC-2; MGC130020; SIGLEC2	CD22	0006955; 0007155; 0016337; 0019735; 0005515; 0005529; 0016021; 0016020; 0005887	immune response; cell adhesion; cell-cell adhesion; antimicrobial humoral response (sensu Vertebrata); protein binding; sugar binding; integral to membrane; membrane; integral to plasma membrane	CD22	0.14874	0.33441	2.22777	1e-05	CD22	279.071	359.34	170.35	198.558	120.617	124.829	92.1572	128.833	184.219	91.9454	425.456	540.926	481.114	411.229
1386194	CD33	Homo sapiens CD33 molecule (CD33), mRNA.	945	NM_001772.2	NP_001763.2	50726999	ILMN_1747622	2640722	S	1064	CCAAGGACACCTCCACCGAATACTCAGAGGTCAGGACCCAGTGAGGAACC	19	+	56434712-56434755:56434756-56434761						19q13.33d	CD33	The membrane surrounding a cell that separates the cell from its external environment. It consists of a phospholipid bilayer and associated proteins [goid 5886] [pmid 3139766] [evidence TAS]; Penetrating at least one phospholipid bilayer of a plasma membrane. May also refer to the state of being buried in the bilayer with no exposure outside the bilayer [goid 5887] [pmid 3139766] [evidence TAS]	The attachment of a cell, either to another cell or to an underlying substrate such as the extracellular matrix, via cell adhesion molecules [goid 7155] [pmid 10611343] [evidence NAS]; The cascade of processes by which a signal interacts with a receptor, causing a change in the level or activity of a second messenger or other downstream target, and ultimately effecting a change in the functioning…	Combining with an extracellular or intracellular messenger to initiate a change in cell activity [goid 4872] [pmid 10611343] [evidence TAS]; Interacting selectively with any protein or protein complex (a complex of two or more proteins that may include other nonprotein molecules) [goid 5515] [evidence IEA]; Interacting selectively with any mono-, di- or trisaccharide carbohydrate [goid 5529] [evi…	SIGLEC3; FLJ00391; SIGLEC-3; p67	SIGLEC3; FLJ00391; SIGLEC-3; p67	CD33	0007267; 0007165; 0007155; 0008285; 0005515; 0004872; 0005529; 0005887; 0005886	cell-cell signaling; signal transduction; cell adhesion; negative regulation of cell proliferation; protein binding; receptor activity; sugar binding; integral to plasma membrane; plasma membrane	CD33	0.15202	0.27191	1.7724	0.00275	CD33	217.418	285.787	235.134	190.739	204.909	90.516	108.812	150.891	185.526	65.5142	553.375	68.3377	234.288	196.272
1389340	CD37	Homo sapiens CD37 antigen (CD37), mRNA.	951	NM_001774.1	NP_001765.1	4502662	ILMN_1658312	2030161	S	755	CGCAGGGCCTCCAGAAGTGGCTGCACAACAACCTTATTTCCATAGTGGGC	19	+	54534406-54534455						19q13.33a	CD37	The membrane surrounding a cell that separates the cell from its external environment. It consists of a phospholipid bilayer and associated proteins [goid 5886] [pmid 8436422] [evidence TAS]; The membrane surrounding a cell that separates the cell from its external environment. It consists of a phospholipid bilayer and associated proteins [goid 5886] [pmid 2466944] [evidence TAS]; Penetrating at …	The posttranslational glycosylation of protein via the N4 atom of peptidyl-asparagine or the N1' atom peptidyl-tryptophan [goid 6487] [pmid 2466944] [evidence TAS]		TSPAN26; GP52-40; MGC120234	TSPAN26; GP52-40; MGC120234	CD37	0006487; 0016021; 0005887; 0005886	protein amino acid N-linked glycosylation; integral to membrane; integral to plasma membrane; plasma membrane	CD37	0.29996	0.60795	2.00831	3e-05	CD37	434.125	462.287	439.898	444.652	180.106	228.209	339.852	357.091	360.777	106.669	1209.85	262.34	404.964	410.154
1387499	CD6	Homo sapiens CD6 molecule (CD6), mRNA.	923	NM_006725.2	NP_006716.2	51036597	ILMN_1746565	4850192	S	3023	GGGCTCAGAAGCTGCACTAGGCCCCGAGTCCCCATGTGTCTCCTTGAATT	11	+	60544218-60544267						11q12.2a	CD6	Double layer of lipid molecules that encloses all cells, and, in eukaryotes, many organelles; may be a single or double lipid bilayer; also includes associated proteins [goid 16020] [evidence IEA]; Double layer of lipid molecules that encloses all cells, and, in eukaryotes, many organelles; may be a single or double lipid bilayer; also includes associated proteins [goid 16020] [evidence IEA]; Pen…	The attachment of a cell, either to another cell or to an underlying substrate such as the extracellular matrix, via cell adhesion molecules [goid 7155] [evidence IEA]	Combining with acetylated low-density lipoproteins, advanced glycation end products, or other polyanionic ligands to initiate a change in cell activity [goid 5044] [evidence IEA]; Combining with acetylated low-density lipoproteins, advanced glycation end products, or other polyanionic ligands to initiate a change in cell activity [goid 5044] [evidence IEA]; Combining with acetylated low-density l…	TP120	TP120	CD6	0006955; 0007155; 0005044; 0005515; 0016020; 0005887; 0009986	immune response; cell adhesion; scavenger receptor activity; protein binding; membrane; integral to plasma membrane; cell surface	CD6	0.20188	0.10571	-1.92728	0.00324	CD6	333.836	160.305	96.3141	371.028	285.923	434.89	126.873	136.446	243.202	129.008	141.529	120.282	102.515	143.963
1384770	CD97	Homo sapiens CD97 molecule (CD97), transcript variant 1, mRNA.	976	NM_078481.2	NP_510966.1	68508935	ILMN_1673363	2070451	A	2951	GGGCGCTTGTCCCATCCTGGACTTTTCCTCTCATGTCTTTGCTGCAGAAC	19	+	14380253-14380302	1400121	I	673	TATCAGTGCCGCTGCCGCCCGGGCTGGCAACCGATTCCGGGGTCCCCCAA	14368960-14369009	19p13.12c	CD97	Double layer of lipid molecules that encloses all cells, and, in eukaryotes, many organelles; may be a single or double lipid bilayer; also includes associated proteins [goid 16020] [evidence IEA]; Penetrating at least one phospholipid bilayer of a membrane. May also refer to the state of being buried in the bilayer with no exposure outside the bilayer. When used to describe a protein, indicates …	The series of molecular signals generated as a consequence of a peptide neurotransmitter binding to a cell surface receptor [goid 7218] [evidence IEA]; Any process involved in the controlled movement of a cell [goid 6928] [pmid 7636245] [evidence TAS]; The immediate defensive reaction (by vertebrate tissue) to infection or injury caused by chemical or physical agents. The process is characterized…	A receptor that binds an extracellular ligand and transmits the signal to a heterotrimeric G-protein complex. These receptors are characteristically seven-transmembrane receptors and are made up of hetero- or homodimers [goid 4930] [evidence IEA]; Interacting selectively with calcium ions (Ca2+) [goid 5509] [evidence IEA]; A receptor that binds an extracellular ligand and transmits the signal to …	TM7LN1	TM7LN1	CD97	0007267; 0007155; 0007218; 0006954; 0006928; 0005515; 0004930; 0005509; 0005887; 0005886	cell-cell signaling; cell adhesion; neuropeptide signaling pathway; inflammatory response; cell motility; protein binding; G-protein coupled receptor activity; calcium ion binding; integral to plasma membrane; plasma membrane	CD97	0.31798	0.49452	1.54102	0.00598	CD97	562.44	296.137	513.916	542.271	317.483	330.008	237.078	263.898	382.904	133.539	1003.23	1085.56	299.756	379.652
1394576	CDA	Homo sapiens cytidine deaminase (CDA), mRNA.	978	NM_001785.1	NP_001776.1	11386156	ILMN_1714592	6060390	S	698	TGAGTCAGCACCCCTCCTAGCAACCTGCCTTGGGACTTAGAACACCGCCG	1	+	20817796-20817845						1p36.12b	CDA	The space external to the outermost structure of a cell. For cells without external protective or external encapsulating structures this refers to space outside of the plasma membrane. This term covers the host cell environment outside an intracellular parasite [goid 5576] [pmid 9596658] [evidence TAS]; That part of the cytoplasm that does not contain membranous or particulate subcellular compone…	Any series of molecular signals initiated by the binding of an extracellular ligand to a receptor on the surface of the target cell [goid 7166] [pmid 9596658] [evidence NAS]; Any process that generates a pyrimidine, any nucleobase, nucleoside, nucleotide or nucleic acid that contains a pyrimidine base, from derivatives of them without de novo synthesis [goid 8655] [pmid 9596658] [evidence NAS]; T…	Interacting selectively with a nucleoside, a compound consisting of a purine or pyrimidine nitrogenous base linked either to ribose or deoxyribose [goid 1882] [pmid 15689149] [evidence IDA]; Catalysis of the reaction: cytidine + H2O = uridine + NH3 [goid 4126] [pmid 7923172] [evidence IDA]; Catalysis of the reaction: cytidine + H2O = uridine + NH3 [goid 4126] [pmid 9596658] [evidence IDA]; Cataly…	CDD; hscd	CDD	CDA	0006139; 0046087; 0046872; 0008270; 0004126; 0016787	nucleobase nucleoside nucleotide and nucleic acid metabolism; cytidine metabolism; metal ion binding; zinc ion binding; cytidine deaminase activity; hydrolase activity	CDA	0.05601	0.15768	2.78959	2e-05	CDA	53.4328	127.772	27.4515	49.563	43.2873	88.6521	84.3384	58.4446	66.6177	31.958	86.1068	518.891	126.718	231.693
1378121	CDC20	Homo sapiens CDC20 cell division cycle 20 homolog (S. cerevisiae) (CDC20), mRNA.	991	NM_001255.1	NP_001246.1	4557436	ILMN_1663390	1710021	S	1563	AAGGCCAGTGCAGCCAAAAGCAGCCTCATCCACCAAGGCATCCGCTGAAG	1	+	43601352-43601387:43601388-43601401						1p34.2a	CDC20	That part of the nuclear content other than the chromosomes or the nucleolus [goid 5654] [pmid 15469984] [evidence EXP]; That part of the nuclear content other than the chromosomes or the nucleolus [goid 5654] [pmid 12791267] [evidence EXP]; The array of microtubules and associated molecules that forms between opposite poles of a eukaryotic cell during mitosis or meiosis and serves to move the du…	The chemical reactions and pathways resulting in the breakdown of a protein or peptide by hydrolysis of its peptide bonds, initiated by the covalent attachment of a ubiquitin moiety, or multiple ubiquitin moieties, to the protein [goid 6511] [pmid 9682218] [evidence TAS]; The progression of biochemical and morphological phases and events that occur in a cell during successive cell replication or …	Interacting selectively with any protein or protein complex (a complex of two or more proteins that may include other nonprotein molecules) [goid 5515] [pmid 17353931] [evidence IPI]; Interacting selectively with any protein or protein complex (a complex of two or more proteins that may include other nonprotein molecules) [goid 5515] [pmid 11030144] [evidence IPI]; Interacting selectively with an…	bA276H19.3; p55CDC	CDC20A; bA276H19.3; MGC102824; p55CDC	CDC20	0051301; 0007067; 0006511; 00074; 0006512; 0005515; 0005819	cell division; mitosis; ubiquitin-dependent protein catabolism; regulation of cell cycle; ubiquitin cycle; protein binding; spindle	CDC20	0.16572	0.32141	1.92178	0.00091	CDC20	169.446	228.785	247.66	312.433	106.444	263.24	162.112	125.359	201.935	72.1147	350.834	514.881	374.684	471.385
1382318	CDC42BPA	Homo sapiens CDC42 binding protein kinase alpha (DMPK-like) (CDC42BPA), transcript variant B, mRNA.	8476	NM_003607.2	NP_003598.2	30089961	ILMN_1784627	4860242	I	2722	ACAGAAACTTGCTCGCCATGTCCGAGATAAGGAAGAAGAGGTGGACCTGG	1	-	225367056-225367105						1q42.13a	CDC42BPA	All of the contents of a cell excluding the plasma membrane and nucleus, but including other subcellular structures [goid 5737] [evidence IEA]; A specialized region of connection between two cells including but not limited to gap junctions, desmosomes, and tight junctions, but excluding direct cytoplasmic junctions such as ring canals [goid 5911] [evidence ISS]; The area of a motile cell closest …	A series of reactions within the cell that occur as a result of a single trigger reaction or compound [goid 7242] [evidence IEA]; A process that is carried out at the cellular level which results in the formation, arrangement of constituent parts, or disassembly of cytoskeletal structures comprising microtubules and their associated proteins [goid 226] [evidence IEA]; The directed movement of the…	Modulates the rate of GTP hydrolysis by a small monomeric GTPase [goid 5083] [evidence IEA]; Catalysis of the transfer of a phosphate group, usually from ATP, to a substrate molecule [goid 16301] [evidence IEA]; Modulates the rate of GTP hydrolysis by a small monomeric GTPase [goid 5083] [evidence IEA]; Catalysis of the transfer of a phosphate group, usually from ATP, to a substrate molecule [goi…	DKFZp686L1738; PK428; DKFZp686P1738; KIAA0451; FLJ23347; MRCK; MRCKA	DKFZp686L1738; PK428; DKFZp686P1738; KIAA0451; FLJ23347; MRCK; MRCKA	CDC42BPA	0007242; 0006468; 0046872; 000166; 0005083; 0004674; 0016740; 0019992; 0005524; 0004713; 0016020; 005634	intracellular signaling cascade; protein amino acid phosphorylation; metal ion binding; nucleotide binding; small GTPase regulator activity; protein serine/threonine kinase activity; transferase activity; diacylglycerol binding; ATP binding; protein-tyrosine kinase activity; membrane; nucleus	CDC42BPA	0.43579	0.23076	-1.90589	2.80697e-07	CDC42BPA	521.012	485.575	419.528	489.777	373.575	841.98	519.615	537.688	523.594	140.161	221.544	368.357	258.484	372.139
1377466	CDC42EP1	Homo sapiens CDC42 effector protein (Rho GTPase binding) 1 (CDC42EP1), transcript variant 2, mRNA.	11135	NM_007061.3	NP_008992.3	34452716	ILMN_1764927	730768	A	1983	CCAACATCCCCGCCCCAGCCTCCCTCTTACCCCAGAAAGGTCAGGTATGA	22	+	36295207-36295256						22q13.1a	CDC42EP1	All of the contents of a cell excluding the plasma membrane and nucleus, but including other subcellular structures [goid 5737] [evidence IEA]; All of the contents of a cell excluding the plasma membrane and nucleus, but including other subcellular structures [goid 5737] [evidence IEA]; All of the contents of a cell excluding the plasma membrane and nucleus, but including other subcellular struct…	A series of molecular signals within the cell that are mediated by a member of the Rho family of proteins switching to a GTP-bound active state [goid 7266] [evidence IEA]; A series of molecular signals within the cell that are mediated by a member of the Rho family of proteins switching to a GTP-bound active state [goid 7266] [evidence IEA]; A series of molecular signals within the cell that are …	Interacting selectively with any protein or protein complex (a complex of two or more proteins that may include other nonprotein molecules) [goid 5515] [evidence IEA]; Interacting selectively with any protein or protein complex (a complex of two or more proteins that may include other nonprotein molecules) [goid 5515] [evidence IEA]; Interacting selectively with any protein or protein complex (a …	MSE55; BORG5; MGC15316; CEP1	MSE55; BORG5; MGC15316; CEP1	CDC42EP1	0008360; 0031274	regulation of cell shape; positive regulation of pseudopodium formation	CDC42EP1	0.22095	0.34481	1.54632	0.00118	CDC42EP1	284.766	277.423	456.753	331.038	153.973	202.438	225.841	206.719	267.369	94.7189	489.619	498.25	513.731	284.92
1381767	CDC42EP2	Homo sapiens CDC42 effector protein (Rho GTPase binding) 2 (CDC42EP2), mRNA.	10435	NM_006779.2	NP_006770.1	30089963	ILMN_1652777	3420747	S	1771	ACGTCGTACCTGACGCTGAGCCTGTCATGAGAATGCAACAGGAGCAAACC	11	+	64846266-64846315						11q13.1c	CDC42EP2	All of the contents of a cell excluding the plasma membrane and nucleus, but including other subcellular structures [goid 5737] [pmid 11035016] [evidence IDA]; Any of the various filamentous elements that form the internal framework of cells, and typically remain after treatment of the cells with mild detergent to remove membrane constituents and soluble components of the cytoplasm. The term embr…	Control of the spatial distribution of actin filaments; includes organizing filaments into meshworks, bundles, or other structures, as by cross-linking [goid 7015] [pmid 11035016] [evidence NAS]; Any process that modulates the surface configuration of a cell [goid 8360] [pmid 11035016] [evidence IDA]; Any process that activates or increases the frequency, rate or extent of actin polymerization [g…	Naturally occurring peptide that is an opioid (any non-alkaloid having an opiate-like effect that can be reversed by naloxone or other recognized morphine antagonist). These include Leu- and Met-enkephalin, dynorphin and neoendorphin, alpha, beta, gamma and delta endorphins formed from beta-lipotropin, various pronase-resistant peptides such as beta casamorphin, and other peptides whose opiate-li…	CEP2; BORG1	CEP2; BORG1	CDC42EP2	0008360; 0005856	regulation of cell shape; cytoskeleton	CDC42EP2	0.21717	0.45432	2.0729	0.00014	CDC42EP2	285.072	351.367	368.189	468.644	123.068	250.184	122.145	163.006	266.459	126.004	1025.65	1000.47	357.948	424.958
1394832	CDCA8	Homo sapiens cell division cycle associated 8 (CDCA8), mRNA.	55143	NM_018101.2	NP_060571.1	51593099	ILMN_1709294	3170487	S	1903	TGTGACTTGCTTGGTGGCCTCATTCCATGTGTGCCTGTGCCTGGGGCATG	1	+	37947578-37947627						1p34.3b	CDCA8	The region of a chromosome that includes the centromere and associated proteins. In monocentric chromosomes, this region corresponds to a single area of the chromosome, whereas in holocentric chromosomes, it is evenly distributed along the chromosome [goid 775] [evidence IEA]; A membrane-bounded organelle of eukaryotic cells in which chromosomes are housed and replicated. In most cells, the nucle…	The progression of biochemical and morphological phases and events that occur in a cell during successive cell replication or nuclear replication events. Canonically, the cell cycle comprises the replication and segregation of genetic material followed by the division of the cell, but in endocycles or syncytial cells nuclear replication or nuclear division may not be followed by cell division [go…	Interacting selectively with any protein or protein complex (a complex of two or more proteins that may include other nonprotein molecules) [goid 5515] [pmid 16291752] [evidence IPI]; Interacting selectively with any protein or protein complex (a complex of two or more proteins that may include other nonprotein molecules) [goid 5515] [pmid 16239925] [evidence IPI]	FLJ12042; FLJ10468; BOR	FLJ12042; FLJ10468; BOR	CDCA8	51301	cell division	CDCA8	0.04557	0.07015	1.52521	0.00057	CDCA8	61.1575	75.3458	47.3261	50.0394	58.7948	47.095	42.281	37.9076	52.4934	12.047	74.8098	100.226	48.9272	112.822
1392235	CDH10	Homo sapiens cadherin 10, type 2 (T2-cadherin) (CDH10), mRNA.	1008	NM_006727.2	NP_006718.2	16306529	ILMN_1791270	1770538	S	2993	AGCAACCTCACAAACAAGCCGCTTCTGTTAGGTACATGTCCTGCCCTTGC	5	-	24523185-24523234						5p14.2a	CDH10	The membrane surrounding a cell that separates the cell from its external environment. It consists of a phospholipid bilayer and associated proteins [goid 5886] [evidence IEA]; Penetrating at least one phospholipid bilayer of a membrane. May also refer to the state of being buried in the bilayer with no exposure outside the bilayer. When used to describe a protein, indicates that all or part of t…	The attachment of an adhesion molecule in one cell to an identical molecule in an adjacent cell [goid 7156] [evidence NAS]	Interacting selectively with calcium ions (Ca2+) [goid 5509] [evidence IEA]; Interacting selectively with any protein or protein complex (a complex of two or more proteins that may include other nonprotein molecules) [goid 5515] [evidence IEA]			CDH10	0007156; 0005509; 0005515; 0016020; 0016021	homophilic cell adhesion; calcium ion binding; protein binding; membrane; integral to membrane	CDH10	1.86621	1.21736	-1.54711	1.65812e-10	CDH10	2471.43	2183.97	2152.22	2088.38	2360.32	2438.33	2483.9	2389.23	2320.97	156.071	1023.32	941.644	1561.54	1983.3
1387140	CDH12	Homo sapiens cadherin 12, type 2 (N-cadherin 2) (CDH12), mRNA.	1010	NM_004061.2	NP_004052.2	16445392	ILMN_1709269	5080192	S	3950	AGACACCGTCTTTATGTCAAGAAGCAATAGCGACACTCTGACTCTCCTCA	5	-	21787075-21787124						5p14.3b-p14.3a	CDH12	The membrane surrounding a cell that separates the cell from its external environment. It consists of a phospholipid bilayer and associated proteins [goid 5886] [evidence IEA]; Penetrating at least one phospholipid bilayer of a membrane. May also refer to the state of being buried in the bilayer with no exposure outside the bilayer. When used to describe a protein, indicates that all or part of t…	The attachment of an adhesion molecule in one cell to an identical molecule in an adjacent cell [goid 7156] [evidence NAS]	Interacting selectively with calcium ions (Ca2+) [goid 5509] [evidence IEA]; Interacting selectively with any protein or protein complex (a complex of two or more proteins that may include other nonprotein molecules) [goid 5515] [evidence IEA]	FLJ34857; CDHB	FLJ34857; CDHB	CDH12	0007156; 0005509; 0005515; 0016020; 0016021	homophilic cell adhesion; calcium ion binding; protein binding; membrane; integral to membrane	CDH12	0.32207	0.18673	-1.74067	0.00719	CDH12	488.629	486.313	137.234	466.262	616.527	315.968	276.309	308.039	386.91	153.564	283.696	235.688	96.0289	522.574
1397160	CDH8	Homo sapiens cadherin 8, type 2 (CDH8), mRNA.	1006	NM_001796.2	NP_001787.2	16306538	ILMN_1757020	4760451	S	2541	GTCCACCACATCAGACTCAGACCAGAATTTTGACTACCTCAGTGACTGGG	16	-	60245074-60245123						16q21c	CDH8	Double layer of lipid molecules that encloses all cells, and, in eukaryotes, many organelles; may be a single or double lipid bilayer; also includes associated proteins [goid 16020] [evidence IEA]; Penetrating at least one phospholipid bilayer of a membrane. May also refer to the state of being buried in the bilayer with no exposure outside the bilayer. When used to describe a protein, indicates …	The attachment of a cell, either to another cell or to an underlying substrate such as the extracellular matrix, via cell adhesion molecules [goid 7155] [evidence IEA]; The attachment of an adhesion molecule in one cell to an identical molecule in an adjacent cell [goid 7156] [evidence IEA]; The attachment of a cell, either to another cell or to an underlying substrate such as the extracellular m…	Interacting selectively with calcium ions (Ca2+) [goid 5509] [evidence IEA]; Interacting selectively with any protein or protein complex (a complex of two or more proteins that may include other nonprotein molecules) [goid 5515] [evidence IEA]; Interacting selectively with calcium ions (Ca2+) [goid 5509] [evidence IEA]; Interacting selectively with any protein or protein complex (a complex of two…	Nbla04261	Nbla04261	CDH8	0007156; 0007155; 0005509; 0005515; 0016020; 0016021	homophilic cell adhesion; cell adhesion; calcium ion binding; protein binding; membrane; integral to membrane	CDH8	1.07066	0.40779	-2.64972	0.0003	CDH8	1374.99	849.199	361.051	1937.56	3058.25	1821.44	656.812	672.453	1341.47	898.735	311.455	338.203	202.529	1051.52
1392642	CDK10	Homo sapiens cyclin-dependent kinase (CDC2-like) 10 (CDK10), transcript variant 3, mRNA.	8558	NM_052988.2	NP_443714.2	32528265	ILMN_1754499	5910670	A	1586	CAGGACTCCAGATGAGGACAAGAGGGACAAGGTATGGGGTGGGAGCCACA	16	+	88290065-88290114	1470484	I	525	AGGCCCTGTCCCTAGATGGCACTTGGTGACACACACTCCCCTCTCTGCTG	88287254-88287282:88287283-88287303	16q24.3b	CDK10		The process of introducing a phosphate group on to a protein [goid 6468] [evidence IEA]; The process of introducing a phosphate group on to a protein [goid 6468] [evidence IEA]; The process resulting in the physical partitioning and separation of a cell into daughter cells [goid 51301] [evidence IEA]; The process of introducing a phosphate group on to a protein [goid 6468] [evidence IEA]; Passage…	Interacting selectively with a nucleotide, any compound consisting of a nucleoside that is esterified with (ortho)phosphate or an oligophosphate at any hydroxyl group on the ribose or deoxyribose moiety [goid 166] [evidence IEA]; Catalysis of the reaction: ATP + a protein serine/threonine = ADP + protein serine/threonine phosphate [goid 4674] [evidence IEA]; Interacting selectively with ATP, aden…	PISSLRE	PISSLRE	CDK10	0007089; 0008285; 0006468; 000166; 0004693; 0016301; 0016740; 0004674; 0005524; 0004713	traversing start control point of mitotic cell cycle; negative regulation of cell proliferation; protein amino acid phosphorylation; nucleotide binding; cyclin-dependent protein kinase activity; kinase activity; transferase activity; protein serine/threonine kinase activity; ATP binding; protein-tyrosine kinase activity	CDK10	0.09238	0.1507	1.6164	6.46779e-08	CDK10	130.502	119.992	81.9054	86.9414	101.029	128.501	125.805	127.875	112.819	19.8915	161.753	242.01	225.929	237.521
1378734	CDK2AP2	Homo sapiens CDK2-associated protein 2 (CDK2AP2), mRNA.	10263	NM_005851.3	NP_005842.1	39725675	ILMN_1690653	5390576	S	1055	TCCCCTCCAGGAACCAAGGAGTGGCCCTCCAGGTGGCAGCACTAAGGACA	11	-	67030817-67030866						11q13.1f	CDK2AP2				p14; FLJ10636; DOC-1R	p14; FLJ10636; DOC-1R	CDK2AP2	0006508; 0004289	proteolysis and peptidolysis; subtilase activity	CDK2AP2	0.52203	0.95547	1.81362	7e-05	CDK2AP2	509.465	773.689	572.523	526.076	328.51	490.833	897.79	943.238	630.266	216.917	664.815	1501.95	1931.96	1120.6
1385309	CDK3	Homo sapiens cyclin-dependent kinase 3 (CDK3), mRNA.	1018	NM_001258.1	NP_001249.1	4557438	ILMN_1767414	3450113	S	881	CAACTCCTGCAGTATGACCCCAGCCAGCGGATCACAGCCAAGACTGCCCT	17	+	71512974-71513023						17q25.1d	CDK3	All of the contents of a cell excluding the plasma membrane and nucleus, but including other subcellular structures [goid 5737] [pmid 18029348] [evidence IDA]; Organized structure of distinctive morphology and function, bounded by a single or double lipid bilayer membrane and occurring within the cell. Includes the nucleus, mitochondria, plastids, vacuoles, and vesicles. Excludes the plasma membr…	The process of introducing a phosphate group on to a protein [goid 6468] [evidence IEA]; The progression of biochemical and morphological phases and events that occur in a cell during successive cell replication or nuclear replication events. Canonically, the cell cycle comprises the replication and segregation of genetic material followed by the division of the cell, but in endocycles or syncyti…	Interacting selectively with a nucleotide, any compound consisting of a nucleoside that is esterified with (ortho)phosphate or an oligophosphate at any hydroxyl group on the ribose or deoxyribose moiety [goid 166] [evidence IEA]; Catalysis of the reaction: ATP + a protein = ADP + a phosphoprotein; dependent on the binding of a regulatory cyclin subunit and full activity requires stimulatory phosp…			CDK3	0008283; 0051301; 0007067; 00074; 0006468; 000166; 0004693; 0016740; 0005524	cell proliferation; cell division; mitosis; regulation of cell cycle; protein amino acid phosphorylation; nucleotide binding; cyclin-dependent protein kinase activity; transferase activity; ATP binding	CDK3	0.03326	0.05143	1.53234	0.0004	CDK3	43.7438	61.1048	33.2051	19.2542	10.1605	48.4844	34.8037	36.7029	35.9324	16.0529	58.057	70.4108	58.3995	57.3176
1393983	CDK5R2	Homo sapiens cyclin-dependent kinase 5, regulatory subunit 2 (p39) (CDK5R2), mRNA.	8941	NM_003936.3	NP_003927.1	42741664	ILMN_1717803	7560110	S	2072	GGGGCTGCCGGCTTCTTTCAGGAGGCTGAGGTTTGGAGGCAAAATCAACC	2	+	219534713-219534762						2q35f	CDK5R2	A protein complex that activates cyclin-dependent kinase 5; composed of regulatory and catalytic subunits [goid 16533] [evidence IEA]	Any process that modulates the frequency, rate or extent of CDK activity [goid 79] [pmid 7592934] [evidence TAS]	[goid 16534] [evidence IEA]	P39; p39nck5ai; NCK5AI	P39; p39nck5ai; NCK5AI	CDK5R2	00079; 0016534; 0016533	regulation of cyclin dependent protein kinase activity; cyclin-dependent protein kinase 5 activator activity; cyclin-dependent protein kinase 5 activator complex	CDK5R2	0.3467	0.15594	-2.24382	0.00043	CDK5R2	372.034	267.429	180.887	595.559	706.339	665.518	253.105	285.381	415.781	207.598	102.064	152.242	55.1469	218.079
1396334	CDK5RAP3	Homo sapiens CDK5 regulatory subunit associated protein 3 (CDK5RAP3), transcript variant 1, mRNA.	80279	NM_176095.1	NP_788275.1	28872789	ILMN_1658579	2940722	I	1606	CCCAGTGTTGGCCTTACGCATGGTCGGCAGGAGAGTCAGTTGTGTGCTCT	17	+	43408177-43408226						17q21.32b	CDK5RAP3	The part of a cell or its extracellular environment in which a gene product is located. A gene product may be located in one or more parts of a cell and its location may be as specific as a particular macromolecular complex, that is, a stable, persistent association of macromolecules that function together [goid 5575] [evidence ND ]	Any process that modulates the frequency, rate or extent of CDK activity [goid 79] [evidence ISS]; The process whose specific outcome is the progression of the brain over time, from its formation to the mature structure. The brain is one of the two components of the central nervous system and is the center of thought and emotion. It is responsible for the coordination and control of bodily activi…	Interacting selectively with any protein or protein complex (a complex of two or more proteins that may include other nonprotein molecules) [goid 5515] [pmid 17785205] [evidence IPI]; Interacting selectively with any protein or protein complex (a complex of two or more proteins that may include other nonprotein molecules) [goid 5515] [pmid 17353931] [evidence IPI]; Interacting selectively with an…	HSF-27; OK/SW-cl.114; MST016; IC53; C53	HSF-27; OK/SW-cl.114; MST016; IC53; C53	CDK5RAP3	0007420; 0008283; 00079; 0045664; 0042808; 0008372	brain development; cell proliferation; regulation of cyclin dependent protein kinase activity; regulation of neuron differentiation; neuronal Cdc2-like kinase binding; cellular component unknown	CDK5RAP3	0.08392	0.21639	2.55499	4.87959e-09	CDK5RAP3	199.482	188.37	75.1056	96.2476	47.2661	96.9483	63.0085	64.5735	103.875	58.1048	271.842	293.469	389.25	332.68
1377422	CDK5RAP3	Homo sapiens CDK5 regulatory subunit associated protein 3 (CDK5RAP3), mRNA.	80279	NM_176096.1	NP_788276.1	28872791	ILMN_1812557	2450112	A	1579	GTGAACCTGATGGGAACCTCTCTGTGACACCCTCCGTGTTCTTGCCTGCC	17	+	43413841-43413867:43413868-43413890						17q21.32b	CDK5RAP3	The part of a cell or its extracellular environment in which a gene product is located. A gene product may be located in one or more parts of a cell and its location may be as specific as a particular macromolecular complex, that is, a stable, persistent association of macromolecules that function together [goid 5575] [evidence ND ]	Any process that modulates the frequency, rate or extent of CDK activity [goid 79] [evidence ISS]; The process whose specific outcome is the progression of the brain over time, from its formation to the mature structure. The brain is one of the two components of the central nervous system and is the center of thought and emotion. It is responsible for the coordination and control of bodily activi…	Interacting selectively with any protein or protein complex (a complex of two or more proteins that may include other nonprotein molecules) [goid 5515] [pmid 17785205] [evidence IPI]; Interacting selectively with any protein or protein complex (a complex of two or more proteins that may include other nonprotein molecules) [goid 5515] [pmid 17353931] [evidence IPI]; Interacting selectively with an…	LZAP; HSF-27; OK/SW-cl.114; MST016; IC53; C53	LZAP; HSF-27; OK/SW-cl.114; MST016; IC53; C53	CDK5RAP3	0007420; 0008283; 00079; 0045664; 0042808; 0008372	brain development; cell proliferation; regulation of cyclin dependent protein kinase activity; regulation of neuron differentiation; neuronal Cdc2-like kinase binding; cellular component unknown	CDK5RAP3	2.24673	3.43548	1.51516	8.02087e-10	CDK5RAP3	3431.37	3026.01	2374.58	2933.72	2217.24	2538.68	2919.15	3006.76	2805.94	398.771	4443.92	4753.13	5267.52	4665.95
1392969	CDKL3	Homo sapiens cyclin-dependent kinase-like 3 (CDKL3), mRNA.	51265	NM_016508.2	NP_057592.1	17017984	ILMN_1770690	7100164	S	686	CCAAGAGCCCCATTTTTGCTGGGGTAGTTCTTCCTCAAGTTCAACACCCC	5	-	133683004-133683053						5q31.1d	CDKL3	A membrane-bounded organelle of eukaryotic cells in which chromosomes are housed and replicated. In most cells, the nucleus contains all of the cell's chromosomes except the organellar chromosomes, and is the site of RNA synthesis and processing. In some species, or in specialized cell types, RNA metabolism or DNA replication may be absent [goid 5634] [pmid 18029348] [evidence IDA]; All of the co…	The covalent alteration of one or more amino acids occurring in proteins, peptides and nascent polypeptides (co-translational, post-translational modifications). Includes the modification of charged tRNAs that are destined to occur in a protein (pre-translation modification) [goid 6464] [pmid 10463609] [evidence TAS]; The process of introducing a phosphate group on to a protein [goid 6468] [evide…	Interacting selectively with a nucleotide, any compound consisting of a nucleoside that is esterified with (ortho)phosphate or an oligophosphate at any hydroxyl group on the ribose or deoxyribose moiety [goid 166] [evidence IEA]; Catalysis of the reaction: ATP + a protein = ADP + a phosphoprotein; dependent on the binding of a regulatory cyclin subunit and full activity requires stimulatory phosp…	NKIAMRE	NKIAMRE	CDKL3	0007166; 0006954; 0004888; 0004909; 0005515; 0016020; 0005887	cell surface receptor linked signal transduction; inflammatory response; transmembrane receptor activity; interleukin-1 Type I activating receptor activity; protein binding; membrane; integral to plasma membrane	CDKL3	0.67937	0.45567	-1.50464	1.12972e-06	CDKL3	753.669	781.087	742.195	747.537	620.162	818.047	1000.52	1127.28	823.812	162.15	485.748	584.889	623.831	555.55
1388979	CDKN1C	Homo sapiens cyclin-dependent kinase inhibitor 1C (p57, Kip2) (CDKN1C), mRNA.	1028	NM_000076.1	NP_000067.1	4557440	ILMN_1718565	3610601	S	1197	AAGAGGCTGCGGTGAGCCAATTTAGAGCCCAAAGAGCCCCGAGGGAACCT	11	-	2861687-2861721:2861805-2861809:2861810-2861819						11p15.4d	CDKN1C	A membrane-bounded organelle of eukaryotic cells in which chromosomes are housed and replicated. In most cells, the nucleus contains all of the cell's chromosomes except the organellar chromosomes, and is the site of RNA synthesis and processing. In some species, or in specialized cell types, RNA metabolism or DNA replication may be absent [goid 5634] [evidence IEA]; A membrane-bounded organelle …	Any process that stops, prevents or reduces the frequency, rate or extent of transcription from an RNA polymerase II promoter [goid 122] [evidence IEA]; The process by which the cell cycle is halted during one of the normal phases (G1, S, G2, M) [goid 7050] [evidence IEA]; A developmental process, independent of morphogenetic (shape) change, that is required for a neuron to attain its fully funct…	Stops, prevents or reduces the activity of a cyclin-dependent protein kinase [goid 4861] [evidence IEA]; Interacting selectively with any protein or protein complex (a complex of two or more proteins that may include other nonprotein molecules) [goid 5515] [evidence IEA]; Stops, prevents or reduces the activity of a cyclin-dependent protein kinase [goid 4861] [evidence IEA]; Catalysis of the tran…	BWCR; p57; BWS; KIP2; WBS	BWCR; p57; BWS; KIP2; WBS	CDKN1C	0007050; 0007049; 00079; 0008285; 00080; 0004861; 0005515; 0005634	cell cycle arrest; cell cycle; regulation of cyclin dependent protein kinase activity; negative regulation of cell proliferation; G1 phase of mitotic cell cycle; cyclin-dependent protein kinase inhibitor activity; protein binding; nucleus	CDKN1C	1.23293	2.64687	2.12724	4.49407e-06	CDKN1C	2492.84	2865.95	1197.37	1479.09	889.554	1186.45	923.288	934.474	1496.13	762.217	4369.22	5064.64	3406.8	3306.73
1383037	CDKN2D	Homo sapiens cyclin-dependent kinase inhibitor 2D (p19, inhibits CDK4) (CDKN2D), transcript variant 1, mRNA.	1032	NM_001800.3	NP_001791.1	39995074	ILMN_1748883	4260070	A	1138	CTAGAAGCTGGTGGCCTTGGCCGGCTGTGCTCAGAGACCTGAAGTGTGCA	19	-	10538349-10538398	1500364	I	204	CCCCGGGAGGGCTGTTCGGGCCAGCGCCCGCCGGCTGCTCCGCGCTGACA	10540378-10540427	19p13.2b	CDKN2D	A membrane-bounded organelle of eukaryotic cells in which chromosomes are housed and replicated. In most cells, the nucleus contains all of the cell's chromosomes except the organellar chromosomes, and is the site of RNA synthesis and processing. In some species, or in specialized cell types, RNA metabolism or DNA replication may be absent [goid 5634] [pmid 15750620] [evidence IDA]; A membrane-bo…	Any process that modulates the frequency, rate or extent of CDK activity [goid 79] [pmid 8741839] [evidence IDA]; Progression from G1 phase to S phase of the mitotic cell cycle [goid 82] [pmid 10208428] [evidence IDA]; Synthesis of DNA that proceeds from the broken 3' single-strand DNA end uses the homologous intact duplex as the template [goid 731] [pmid 15750620] [evidence IMP]; A process which…	Stops, prevents or reduces the activity of a cyclin-dependent protein kinase [goid 4861] [pmid 8741839] [evidence IDA]; Interacting selectively with a protein kinase, any enzyme that catalyzes the transfer of a phosphate group, usually from ATP, to a protein substrate [goid 19901] [pmid 8741839] [evidence IPI]	p19-INK4D; INK4D; p19	p19-INK4D; INK4D; p19	CDKN2D	00079; 0007050; 0008285; 0007049; 0004861; 0005737; 0005634	regulation of cyclin dependent protein kinase activity; cell cycle arrest; negative regulation of cell proliferation; cell cycle; cyclin-dependent protein kinase inhibitor activity; cytoplasm; nucleus	CDKN2D	0.95835	0.58802	-1.6448	0.00185	CDKN2D	995.743	810.628	873.635	1505.07	2070.67	1331.02	958.692	903.739	1181.15	432.816	393.593	606.428	484.933	973.757
1384832	CDR2L	Homo sapiens cerebellar degeneration-related protein 2-like (CDR2L), mRNA.	30850	NM_014603.1	NP_055418.1	32698689	ILMN_1787191	2370669	S	3342	CTGCCCTCCGTGTGTGTCTGTTATCTGGGGGAGAGGAGTGTGGAAGGGTT	17	+	70513296-70513345						17q25.1c	CDR2L				HUMPPA	HUMPPA	CDR2L	0006810; 0005215; 0016021	transport; transporter activity; integral to membrane	CDR2L	0.56332	1.01594	1.78702	5.13499e-06	CDR2L	813.872	831.271	751.34	888.206	356.728	613.791	609.437	609.52	684.271	172.351	1558.89	2368.85	1533.49	1452.38
1388695	CDS1	Homo sapiens CDP-diacylglycerol synthase (phosphatidate cytidylyltransferase) 1 (CDS1), mRNA.	1040	NM_001263.2	NP_001254.2	22035623	ILMN_1801476	1240739	S	2275	GCAAGGCACAATAGGAAGTCAGTTCTCCTGCACTTCCTCCTCATGTAGTC	4	+	85789254-85789303						4q21.23b	CDS1	The irregular network of unit membranes, visible only by electron microscopy, that occurs in the cytoplasm of many eukaryotic cells. The membranes form a complex meshwork of tubular channels, which are often expanded into slitlike cavities called cisternae. The ER takes two forms, rough (or granular), with ribosomes adhering to the outer surface, and smooth (with no ribosomes attached) [goid 5783…	The chemical reactions and pathways involving lipids, compounds soluble in an organic solvent but not, or sparingly, in an aqueous solvent. Includes fatty acids; neutral fats, other fatty-acid esters, and soaps; long-chain (fatty) alcohols and waxes; sphingoids and other long-chain bases; glycolipids, phospholipids and sphingolipids; and carotenes, polyprenols, sterols, terpenes and other isopren…	Interacting selectively with magnesium (Mg) ions [goid 287] [evidence IEA]; Catalysis of the reaction: CDP-choline + 1,2-diacylglycerol = CMP + a phosphatidylcholine [goid 4142] [pmid 9115637] [evidence TAS]; Catalysis of the reaction: CTP + phosphatidate = diphosphate + CDP-diacylglycerol [goid 4605] [evidence IEA]; Catalysis of the transfer of a group, e.g. a methyl group, glycosyl group, acyl …	CDS	CDS	CDS1	0008654; 0007165; 0007601; 0006629; 0004605; 000287; 0016740; 0004142; 0016021; 0016020; 005783	phospholipid biosynthesis; signal transduction; visual perception; lipid metabolism; phosphatidate cytidylyltransferase activity; magnesium ion binding; transferase activity; diacylglycerol cholinephosphotransferase activity; integral to membrane; membrane; endoplasmic reticulum	CDS1	2.1568	1.36514	-1.59446	0.00387	CDS1	1884.19	2048.93	1803.98	2701.07	2459.51	3468.42	3859.03	3763.12	2748.53	844.759	918.584	902.256	1372.7	3275.17
1384285	CEBPA	Homo sapiens CCAAT/enhancer binding protein (C/EBP), alpha (CEBPA), mRNA.	1050	NM_004364.2	NP_004355.2	28872793	ILMN_1715715	2650148	S	2050	GCCCCAGCAGTGCCTTGTGCAATGTGAATGTGCGCGTCTCTGCTAAACCA	19	-	38483061-38483110						19q13.11b	CEBPA	A membrane-bounded organelle of eukaryotic cells in which chromosomes are housed and replicated. In most cells, the nucleus contains all of the cell's chromosomes except the organellar chromosomes, and is the site of RNA synthesis and processing. In some species, or in specialized cell types, RNA metabolism or DNA replication may be absent [goid 5634] [pmid 7575576] [evidence NAS]	The chemical reactions and pathways resulting in the formation of precursor metabolites, substances from which energy is derived, and any process involved in the liberation of energy from these substances [goid 6091] [pmid 8643605] [evidence TAS]; The synthesis of either RNA on a template of DNA or DNA on a template of RNA [goid 6350] [pmid 15664994] [evidence IDA]; The synthesis of either RNA on…	Functions to initiate or regulate RNA polymerase II transcription by binding an enhancer region of DNA [goid 3705] [pmid 7575576] [evidence NAS]; Interacting selectively with a transcription factor, any protein required to initiate or regulate transcription [goid 8134] [pmid 15664994] [evidence IPI]; Interacting selectively with DNA of a specific nucleotide composition, e.g. GC-rich DNA binding, …	CEBP; C/EBP-alpha	CEBP; C/EBP-alpha	CEBPA	0006355; 0006091; 0006350; 0006366; 0030099; 0019221; 0003705; 0008134; 0046983; 0043565; 0005634	regulation of transcription DNA-dependent; generation of precursor metabolites and energy; transcription; transcription from RNA polymerase II promoter; myeloid cell differentiation; cytokine and chemokine mediated signaling pathway; RNA polymerase II transcription factor activity enhancer binding; transcription factor binding; protein dimerization activity; sequence-specific DNA binding; nucleus	CEBPA	1.04885	2.01334	1.90205	0.00021	CEBPA	1478.21	2341.67	1510.62	1870.51	958.717	783.143	667.125	645.615	1281.95	620.649	3344.13	1790.79	1949.31	1161.04
1384389	CEL	Homo sapiens carboxyl ester lipase (bile salt-stimulated lipase) (CEL), mRNA.	1056	NM_001807.2	NP_001798.1	27894374	ILMN_1723418	4040731	S	2217	CCAAGGAAGCTCAGATGCCTGCAGTCATTAGGTTTTAGCGTCCCATGAGC	9	+	134936935-134936972:134936973-134936984						9q34.2a	CEL	A membrane-bounded organelle of eukaryotic cells in which chromosomes are housed and replicated. In most cells, the nucleus contains all of the cell's chromosomes except the organellar chromosomes, and is the site of RNA synthesis and processing. In some species, or in specialized cell types, RNA metabolism or DNA replication may be absent [goid 5634] [pmid 18029348] [evidence IDA]; The space ext…	The chemical reactions and pathways resulting in the breakdown of cholesterol, cholest-5-en-3 beta-ol, the principal sterol of vertebrates and the precursor of many steroids, including bile acids and steroid hormones [goid 6707] [evidence ISS]; The regulated release of pancreatic juice by the exocrine pancreas into the upper part of the intestine. Pancreatic juice is slightly alkaline and contain…	Catalysis of the hydrolysis of various bonds, e.g. C-O, C-N, C-C, phosphoric anhydride bonds, etc. Hydrolase is the systematic name for any enzyme of EC class 3 [goid 16787] [evidence IEA]; Catalysis of the hydrolysis of various bonds, e.g. C-O, C-N, C-C, phosphoric anhydride bonds, etc. Hydrolase is the systematic name for any enzyme of EC class 3 [goid 16787] [evidence IEA]; Catalysis of the re…	FAP; CELL; BSDL; CEase; BSSL; MODY8; LIPA; BAL; FAPP	FAP; CELL; BSDL; CEase; BSSL; MODY8; LIPA; BAL; FAPP	CEL	0006641; 0016042; 0030299; 0006707; 0030157; 0004806; 0004771; 0016787; 0004759	triacylglycerol metabolism; lipid catabolism; cholesterol absorption; cholesterol catabolism; pancreatic juice secretion; triacylglycerol lipase activity; sterol esterase activity; hydrolase activity; serine esterase activity	CEL	0.10238	0.22429	2.17084	0.00329	CEL	198.287	270.862	160.102	108.172	28.0202	83.4943	91.4685	76.8504	127.157	78.0982	181.22	134.35	648.941	359.185
1392153	CELSR2	Homo sapiens cadherin, EGF LAG seven-pass G-type receptor 2 (flamingo homolog, Drosophila) (CELSR2), mRNA.	1952	NM_001408.1	NP_001399.1	13325063	ILMN_1711208	4390338	S	10219	CTGGAGCAGGTGGCTAGAAAAAGAGGCTGTGGGCAGGAAAGAAAGGCTCC	1	+	109619580-109619629						1p13.3b	CELSR2	All of the contents of a cell excluding the plasma membrane and nucleus, but including other subcellular structures [goid 5737] [evidence ISS]; The membrane surrounding a cell that separates the cell from its external environment. It consists of a phospholipid bilayer and associated proteins [goid 5886] [evidence IEA]; Penetrating at least one phospholipid bilayer of a membrane. May also refer to…	The attachment of an adhesion molecule in one cell to an identical molecule in an adjacent cell [goid 7156] [evidence IEA]; The cascade of processes by which a signal interacts with a receptor, causing a change in the level or activity of a second messenger or other downstream target, and ultimately effecting a change in the functioning of the cell [goid 7165] [evidence IEA]; The series of molecu…	Combining with an extracellular or intracellular messenger to initiate a change in cell activity [goid 4872] [evidence IEA]; A receptor that binds an extracellular ligand and transmits the signal to a heterotrimeric G-protein complex. These receptors are characteristically seven-transmembrane receptors and are made up of hetero- or homodimers [goid 4930] [pmid 10907856] [evidence NAS]; Interactin…	CDHF10; FLJ42737; Flamingo1; MEGF3; KIAA0279; EGFL2; FLJ34118; FLJ45845; FLJ45143	CDHF10; FLJ42737; Flamingo1; MEGF3; KIAA0279; EGFL2; FLJ34118; FLJ45845; FLJ45143	CELSR2	0007165; 0007275; 0007218; 0007156; 0005198; 0004872; 0004930; 0005509; 0016021; 0016020	signal transduction; development; neuropeptide signaling pathway; homophilic cell adhesion; structural molecule activity; receptor activity; G-protein coupled receptor activity; calcium ion binding; integral to membrane; membrane	CELSR2	1.77499	2.93811	1.64019	2e-05	CELSR2	3174.47	3218.62	1852.59	2317.28	1606.6	2035.21	1673.88	1503.09	2172.72	682.163	3453.68	5439.51	3447.48	3695.16
1378769	CENPE	Homo sapiens centromere protein E, 312kDa (CENPE), mRNA.	1062	NM_001813.2	NP_001804.2	71061467	ILMN_1716279	1300736	S	8098	CCAGAGGTGCAAAATGCAGGAGCAGAGAGTGTGGATTCTCAGCCAGGTCC	4	-	104246876-104246922:104249409-104249411						4q24b	CENPE	The region of a chromosome that includes the centromere and associated proteins. In monocentric chromosomes, this region corresponds to a single area of the chromosome, whereas in holocentric chromosomes, it is evenly distributed along the chromosome [goid 775] [pmid 11084331] [evidence IDA]; The region of a condensed chromosome kinetochore most external to centromeric DNA; this outer region medi…	Progression through metaphase, the stage of mitosis at which chromosomes are firmly attached to the mitotic spindle at its equator but have not yet segregated to opposite poles [goid 89] [pmid 2022189] [evidence TAS]; Movement of organelles, other microtubules and other particles along microtubules, mediated by motor proteins [goid 7018] [evidence IEA]; The progression of biochemical and morpholo…	Interacting selectively with a nucleotide, any compound consisting of a nucleoside that is esterified with (ortho)phosphate or an oligophosphate at any hydroxyl group on the ribose or deoxyribose moiety [goid 166] [evidence IEA]; Catalysis of movement along a microtubule, coupled to the hydrolysis of a nucleoside triphosphate (usually ATP) [goid 3777] [pmid 9363944] [evidence TAS]; Interacting se…	KIF10	KIF10	CENPE	0007079; 0007018; 0007049; 0051382; 0051301; 0007080; 00089; 000166; 0003777; 0005515; 0043515; 0005524; 000775; 0005874; 000940; 0005875; 0005634	mitotic chromosome movement towards spindle pole; microtubule-based movement; cell cycle; kinetochore assembly; cell division; mitotic metaphase plate congression; mitotic metaphase; nucleotide binding; microtubule motor activity; protein binding; kinetochore binding; ATP binding; chromosome pericentric region; microtubule; outer kinetochore of condensed chromosome; microtubule associated complex…	CENPE	0.17231	0.1066	-1.63138	0.00171	CENPE	261.704	158.97	198.925	239.611	329.168	203.211	131.181	136.627	207.425	67.6829	216.9	95.5884	63.3889	112.213
1384688	CENTA2	Homo sapiens centaurin, alpha 2 (CENTA2), mRNA.	55803	NM_018404.1	NP_060874.1	8923762	ILMN_1763000	7150521	S	2447	GCTGGGTTGTGCATTAAGGGCCAGTTTACTTGTCTGCCTCTTTGACCACC	17	+	26310214-26310263						17q11.2c	CENTA2	All of the contents of a cell excluding the plasma membrane and nucleus, but including other subcellular structures [goid 5737] [pmid 14690521] [evidence IDA]; The double lipid bilayer enclosing the mitochondrion and separating its contents from the cell cytoplasm; includes the intermembrane space [goid 5740] [pmid 12018390] [evidence ISS]; The membrane surrounding a cell that separates the cell …	The process whose specific outcome is the progression of the heart over time, from its formation to the mature structure. The heart is a hollow, muscular organ, which, by contracting rhythmically, keeps up the circulation of the blood [goid 7507] [pmid 16138909] [evidence IEP]; Any process that modulates the activity of the GTPase ARF [goid 32312] [evidence IEA]; Any process that modulates the ac…	Interacting selectively with phosphatidylinositol-4,5-bisphosphate, a diphosphorylated derivative of phosphatidylinositol [goid 5546] [pmid 12018390] [evidence ISS]; Interacting selectively with phosphatidylinositol-3,4,5-triphosphate, the triphosphorylated derivative of phosphatidylinositol [goid 5547] [pmid 14690521] [evidence IDA]; Increases the rate of GTP hydrolysis by the GTPase ARF [goid 8…	cent-b; HSA272195	cent-b; HSA272195	CENTA2	0007507; 0043087; 0046872; 0030674; 0043533; 0043325; 0008270; 0005547; 0005546; 0005096; 0005737; 0005886; 0005740	heart development; regulation of GTPase activity; metal ion binding; protein binding bridging; inositol 1345 tetrakisphosphate binding; phosphatidylinositol-34-bisphosphate binding; zinc ion binding; phosphatidylinositol-345-triphosphate binding; phosphatidylinositol-45-bisphosphate binding; GTPase activator activity; cytoplasm; plasma membrane; mitochondrial membrane	CENTA2	0.73921	1.17236	1.57148	0.00379	CENTA2	1134.43	852.881	1587.86	922.475	682.866	435.018	787.499	832.35	904.421	340.432	2529.1	806.771	925.827	707.39
1380415	CENTD3	Homo sapiens centaurin, delta 3 (CENTD3), mRNA.	64411	NM_022481.5	NP_071926.4	58331234	ILMN_1812618	6280040	S	5153	CATTCTGGGACTACCGTGAAGCCTGGAGTAGGGAGAGCGAGTTTGGGAGC	5	-	141013211-141013260						5q31.3c	CENTD3	Projection at the leading edge of a crawling cell; the protrusions are supported by a microfilament meshwork [goid 1726] [evidence ISS]; The living contents of a cell; the matter contained within (but not including) the plasma membrane, usually taken to exclude large vacuoles and masses of secretory or ingested material. In eukaryotes it includes the nucleus and cytoplasm [goid 5622] [evidence IE…	A process that is carried out at the cellular level which results in the formation, arrangement of constituent parts, or disassembly of cytoskeletal structures [goid 7010] [pmid 15569923] [evidence TAS]; The cascade of processes by which a signal interacts with a receptor, causing a change in the level or activity of a second messenger or other downstream target, and ultimately effecting a change…	Interacting selectively with phosphatidylinositol-3,4,5-triphosphate, the triphosphorylated derivative of phosphatidylinositol [goid 5547] [pmid 11804589] [evidence IDA]; Increases the rate of GTP hydrolysis by the GTPase ARF [goid 8060] [evidence ISS]; Interacting selectively with zinc (Zn) ions [goid 8270] [evidence IEA]; Increases the rate of GTP hydrolysis by a GTPase of the Rac family [goid …	FLJ21065; ARAP3; DRAG1	FLJ21065; ARAP3; DRAG1	CENTD3	0035024; 0030336; 0007165; 0007010; 0008360; 0016192; 0043087; 0005100; 0046872; 0030675; 0043325; 0005547; 0008060; 0001726; 0030027; 0005737	negative regulation of Rho protein signal transduction; negative regulation of cell migration; signal transduction; cytoskeleton organization and biogenesis; regulation of cell shape; vesicle-mediated transport; regulation of GTPase activity; Rho GTPase activator activity; metal ion binding; Rac GTPase activator activity; phosphatidylinositol-34-bisphosphate binding; phosphatidylinositol-345-trip…	CENTD3	0.399	0.84318	2.09397	3e-05	CENTD3	684.522	730.811	324.142	359.94	443.521	445.749	400.243	443.618	479.068	148.142	621.707	1887.69	1955.85	1130.57
1377719	CEP170	Homo sapiens centrosomal protein 170kDa (CEP170), mRNA.	9859	NM_014812.1	NP_055627.1	7662141	ILMN_1755290	3400035	A	550	ATATTTCTGCTATGCCCCGTGGTACTCCATTATATGGGCAGCCGTCATGG	1	-	241429057-241429106						1q43f	CEP170	All of the contents of a cell excluding the plasma membrane and nucleus, but including other subcellular structures [goid 5737] [evidence IEA]; Any of the various filamentous elements that form the internal framework of cells, and typically remain after treatment of the cells with mild detergent to remove membrane constituents and soluble components of the cytoplasm. The term embraces intermediat…			FAM68A; KAB; KIAA0470	FAM68A; KAB; KIAA0470	CEP170	0004; 0005554; 0008372	biological process unknown; molecular function unknown; cellular component unknown	CEP170	0.07922	0.04984	-1.60408	1e-05	CEP170	96.9733	97.8954	88.2819	106.012	106.543	124.34	89.0755	61.7484	96.3587	18.1216	86.0847	29.3008	44.8304	55.8258
1378496	CEP192	Homo sapiens centrosomal protein 192kDa (CEP192), mRNA.	55125	NM_032142.2	NP_115518.2	50811888	ILMN_1703754	5090465	A	6869	CCCAGCATTACATCAACATGCCCGTGCAGTTCAAACCGAAGTCCGCAGGC	18	+	13114633-13114682						18p11.21d	CEP192	A structure comprised of a core structure (in most organisms, a pair of centrioles) and peripheral material from which a microtubule-based structure, such as a spindle apparatus, is organized. Centrosomes occur close to the nucleus during interphase in many eukaryotic cells, though in animal cells it changes continually during the cell-division cycle [goid 5813] [evidence IEA]					CEP192	0006915; 0016567; 0004842; 0046872; 0008270; 000151; 0005634	apoptosis; protein ubiquitination; ubiquitin-protein ligase activity; metal ion binding; zinc ion binding; ubiquitin ligase complex; nucleus	CEP192	0.61129	0.98382	1.59472	0.00464	CEP192	1104.35	1034.4	618.01	916.159	618.444	568.822	540.44	520.871	740.186	238.223	2623.55	941.475	1635.31	980.803
1381244	CEP290	Homo sapiens centrosomal protein 290kDa (CEP290), mRNA.	80184	NM_025114.2	NP_079390.2	51890222	ILMN_1679734	2750017	S	7325	TCCTGAAGGTGCTGAGACAGAGCAAGGCCTTAAACGGGAGCTTCAAGTTC	12	-	86972251-86972300						12q21.32a	CEP290	A multiprotein complex composed of gamma-tubulin and other non-tubulin proteins. Gamma-tubulin complexes are localized to microtubule organizing centers, and play an important role in the nucleation of microtubules. The number and complexity of non-tubulin proteins associated with these complexes varies between species [goid 930] [pmid 16682973] [evidence IDA]; A membrane-bounded organelle of euk…	The directed movement of proteins into, out of, within or between cells [goid 15031] [evidence ISS]; A process that is carried out at the cellular level which results in the formation, arrangement of constituent parts, or disassembly of a prolongation or process extending from a cell, e.g. a flagellum or axon [goid 30030] [evidence IEA]; The process whose specific outcome is the progression of th…	Interacting selectively with any protein or protein complex (a complex of two or more proteins that may include other nonprotein molecules) [goid 5515] [pmid 16682973] [evidence IPI]; Any transcription regulator activity required for initiation or upregulation of transcription [goid 16563] [pmid 16682973] [evidence IDA]; Interacting selectively with the minus end of a microtubule [goid 51011] [pm…	FLJ21979; FLJ13615; KIAA0373; 3H11Ag; 3H11	MKS4; JBTS5; SLSN6; JBTS6; rd16; NPHP6; FLJ21979; FLJ13615; KIAA0373; 3H11Ag; LCA10	CEP290	9986	cell surface	CEP290	0.89815	0.52649	-1.72164	0.00175	CEP290	901.159	951.113	1347.64	1386.26	687.83	1613.15	956.339	977.252	1102.59	310.262	1168.35	807.047	558.844	795.069
1382832	CFD	Homo sapiens complement factor D (adipsin) (CFD), mRNA.	1675	NM_001928.2	NP_001919.2	42544238	ILMN_1777190	5720243	S	820	GCAACAAAGTCCCGAGCAATGAAGTCATCCACTCCTGCATCTGGTTGGTC	19	+	814271-814320						19p13.3i	CFD	The space external to the outermost structure of a cell. For cells without external protective or external encapsulating structures this refers to space outside of the plasma membrane. This term covers the host cell environment outside an intracellular parasite [goid 5576] [evidence IEA]; The space external to the outermost structure of a cell. For cells without external protective or external en…	The hydrolysis of a peptide bond or bonds within a protein [goid 6508] [pmid 1374388] [evidence TAS]; Any process involved in the activation of any of the steps of the alternative pathway of the complement cascade which allows for the direct killing of microbes and the regulation of other immune processes [goid 6957] [evidence IEA]; Any process involved in the activation of any of the steps of th…	Catalysis of the hydrolysis of internal, alpha-peptide bonds in a polypeptide chain by a catalytic mechanism that involves a catalytic triad consisting of a serine nucleophile that is activated by a proton relay involving an acidic residue (e.g. aspartate or glutamate) and a basic residue (usually histidine) [goid 4252] [pmid 1374388] [evidence TAS]; Catalysis of the hydrolysis of a peptide bond.…	ADN; DF; PFD	ADN; DF; PFD	CFD	0006957; 0045087; 0006508; 0008233; 0003817	complement activation alternative pathway; innate immune response; proteolysis and peptidolysis; peptidase activity; complement factor D activity	CFD	0.36512	0.73968	2.00737	0.0013	CFD	647.953	466.595	414.511	472.194	284.507	159.459	511.138	557.442	439.225	154.627	918.568	558.877	1404.93	331.19
1387167	CGN	Homo sapiens cingulin (CGN), mRNA.	57530	NM_020770.1	NP_065821.1	16262451	ILMN_1746801	3780433	S	4934	CCTAAGCAGGTTGTATAGGGAGCCGGTGGCAGGAGGAAGGCTGTTTTCAC	1	+	149777635-149777684						1q21.3a	CGN	A belt-like region of very close contact between the plasma membranes of adjacent cells so that the intercellular space is completely occluded. They occur in epithelia and brain endothelia [goid 5923] [pmid 12529927] [evidence NAS]; A protein complex, formed of one or more myosin heavy chains plus associated light chains and other proteins, that functions as a molecular motor; uses the energy of …	Any process specifically pertinent to the functioning of integrated living units: cells, tissues, organs, and organisms. A process is a collection of molecular events with a defined beginning and end [goid 8150] [evidence ND ]	Catalysis of movement along a polymeric molecule such as a microfilament or microtubule, coupled to the hydrolysis of a nucleoside triphosphate [goid 3774] [evidence IEA]; Interacting selectively with monomeric or multimeric forms of actin, including actin filaments [goid 3779] [evidence ISS]; Interacting selectively with any protein or protein complex (a complex of two or more proteins that may …	FLJ39281; DKFZp779N1112; KIAA1319	FLJ39281; DKFZp779N1112; KIAA1319	CGN	0004; 0003779; 0005515; 0003774; 0005923; 0016459	biological process unknown; actin binding; protein binding; motor activity; tight junction; myosin	CGN	0.49874	0.78931	1.56817	0.0009	CGN	733.625	819.499	490.578	628.236	335.692	505.548	651.862	657.556	602.825	152.842	752.922	1235.26	1546.74	1056.29
1389671	CHCHD6	Homo sapiens coiled-coil-helix-coiled-coil-helix domain containing 6 (CHCHD6), mRNA.	84303	NM_032343.1	NP_115719.1	14150133	ILMN_1785161	3180327	S	636	TTGCAGGCCCAGATTCTCCACTGCTACCGAGATCGCCCGCATGAGGTGCT	3	+	128158980-128159029						3q21.3a	CHCHD6				MGC13016	MGC13016	CHCHD6	16021	integral to membrane	CHCHD6	0.70527	0.44206	-1.6101	0.00307	CHCHD6	688.669	545.746	648.656	1245.82	1517.74	855.126	662.607	741.338	863.212	339.587	463.56	346.122	466.305	487.571
1384423	CHD5	Homo sapiens chromodomain helicase DNA binding protein 5 (CHD5), mRNA.	26038	NM_015557.1	NP_056372.1	24308088	ILMN_1698148	6860019	S	9541	GCCCACGGGAGGCTGGACAGAGGCTGTAGCCAACACAATCACCTTTACTT	1	-	6084495-6084544						1p36.31b	CHD5	The ordered and organized complex of DNA and protein that forms the chromosome [goid 785] [evidence IEA]; A membrane-bounded organelle of eukaryotic cells in which chromosomes are housed and replicated. In most cells, the nucleus contains all of the cell's chromosomes except the organellar chromosomes, and is the site of RNA synthesis and processing. In some species, or in specialized cell types,…	The formation or destruction of chromatin structures [goid 6333] [evidence IEA]; Any process that modulates the frequency, rate or extent of DNA-dependent transcription [goid 6355] [evidence IEA]; The alteration of DNA or protein in chromatin, which may result in changing the chromatin structure [goid 16568] [evidence IEA]; The formation or destruction of chromatin structures [goid 6333] [evidenc…	Interacting selectively with a nucleotide, any compound consisting of a nucleoside that is esterified with (ortho)phosphate or an oligophosphate at any hydroxyl group on the ribose or deoxyribose moiety [goid 166] [evidence IEA]; Interacting selectively with DNA (deoxyribonucleic acid) [goid 3677] [evidence IEA]; Interacting selectively with chromatin, the network of fibers of DNA and protein tha…	KIAA0444; DKFZp434N231	KIAA0444; DKFZp434N231	CHD5	0016567; 0006338; 0006355; 0006350; 0007399; 0016568; 0006333; 0046872; 000166; 0003677; 0005524; 0016787; 0005515; 0004842; 0008270; 0004386; 0003682; 0008026; 000151; 000785; 0005634	protein ubiquitination; chromatin remodeling; regulation of transcription DNA-dependent; transcription; neurogenesis; chromatin modification; chromatin assembly or disassembly; metal ion binding; nucleotide binding; DNA binding; ATP binding; hydrolase activity; protein binding; ubiquitin-protein ligase activity; zinc ion binding; helicase activity; chromatin binding; ATP-dependent helicase activi…	CHD5	2.37261	1.2331	-1.94182	5.91987e-06	CHD5	1814.1	2217.05	2760.94	3091.92	4102.06	4106.35	3094.22	3033.85	3027.56	804.228	846.499	1055.97	460.715	2468.13
1384346	CHFR	Homo sapiens checkpoint with forkhead and ring finger domains (CHFR), mRNA.	55743	NM_018223.1	NP_060693.1	8922674	ILMN_1653828	1110048	S	2866	TGAGGGGCACCTTGGCTTCCGCCTGTGCTAGCTTTGCCATGTCATCTGGA	12	-	131927233-131927282						12q24.33d	CHFR	The part of a cell or its extracellular environment in which a gene product is located. A gene product may be located in one or more parts of a cell and its location may be as specific as a particular macromolecular complex, that is, a stable, persistent association of macromolecules that function together [goid 5575] [pmid 10935642] [evidence ND ]; A membrane-bounded organelle of eukaryotic cell…	Addition of multiple ubiquitin moieties to a protein, forming a ubiquitin chain [goid 209] [evidence IEA]; Progression through the phases of the mitotic cell cycle, the most common eukaryotic cell cycle, which canonically comprises four successive phases called G1, S, G2, and M and includes replication of the genome and the subsequent segregation of chromosomes into daughter cells. In some varian…	Catalysis of the reaction: ATP + ubiquitin + protein lysine = AMP + diphosphate + protein N-ubiquityllysine [goid 4842] [evidence IEA]; Interacting selectively with any protein or protein complex (a complex of two or more proteins that may include other nonprotein molecules) [goid 5515] [evidence IEA]; Interacting selectively with any protein or protein complex (a complex of two or more proteins …	RNF196; FLJ10796; FLJ33629; RNF116	RNF196; FLJ10796; FLJ33629; RNF116	CHFR	0007049; 0016567; 0051301; 0007067; 0007093; 0046872; 0004842; 0008270; 0016874; 000151; 005634	cell cycle; protein ubiquitination; cell division; mitosis; mitotic checkpoint; metal ion binding; ubiquitin-protein ligase activity; zinc ion binding; ligase activity; ubiquitin ligase complex; nucleus	CHFR	0.84716	1.32925	1.55476	2.37251e-06	CHFR	1135.14	1456.81	1255.11	989.713	778.608	1172.09	784.107	705.808	1034.67	265.732	1790.03	2405.36	2224.57	1476.01
1379041	CHKA	Homo sapiens choline kinase alpha (CHKA), transcript variant 1, mRNA.	1119	NM_001277.2	NP_001268.2	47078275	ILMN_1658504	6770468	A	2498	GATGCCCCTGACATCATCATTCTTGTGGGAGACAGCAGCCTGTATGTGGT	11	-	67577071-67577120						11q13.2a	CHKA	All of the contents of a cell excluding the plasma membrane and nucleus, but including other subcellular structures [goid 5737] [evidence IEA]	The chemical reactions and pathways involving lipids, compounds soluble in an organic solvent but not, or sparingly, in an aqueous solvent. Includes fatty acids; neutral fats, other fatty-acid esters, and soaps; long-chain (fatty) alcohols and waxes; sphingoids and other long-chain bases; glycolipids, phospholipids and sphingolipids; and carotenes, polyprenols, sterols, terpenes and other isopren…	Catalysis of the reaction: ATP + choline = ADP + O-phosphocholine [goid 4103] [pmid 10363580] [evidence TAS]; Mediates the transfer of a signal from the outside to the inside of a cell by means other than the introduction of the signal molecule itself into the cell [goid 4871] [pmid 10363580] [evidence TAS]; Catalysis of the transfer of a group, e.g. a methyl group, glycosyl group, acyl group, ph…	CHK; CKI	CHK; CKI	CHKA	0006869; 0006629; 0045735; 0016740; 0004871; 0004103	lipid transport; lipid metabolism; nutrient reservoir activity; transferase activity; signal transducer activity; choline kinase activity	CHKA	2.70324	4.16845	1.52795	2e-05	CHKA	3639.71	4575.76	2690.79	3710.05	2539.15	3281.74	3263.04	3338.56	3379.85	633.958	5928.3	7388.27	7175.73	5327.69
1379629	CHN1	Homo sapiens chimerin (chimaerin) 1 (CHN1), transcript variant 1, mRNA.	1123	NM_001822.3	NP_001813.1	68533258	ILMN_1678493	1710369	A	2159	GCACCGCCTCTGCGTCCTGGGTAGTCTGTGCTTGTAATCCAGCATGTTTC	2	-	175372736-175372785	7320474	I	254	GCTCCCTGGGCCCGGTGCGCCCGACAATAACGCGTGAATAACTTTTTCTT	175578058-175578107	2q31.1g	CHN1	The living contents of a cell; the matter contained within (but not including) the plasma membrane, usually taken to exclude large vacuoles and masses of secretory or ingested material. In eukaryotes it includes the nucleus and cytoplasm [goid 5622] [evidence IEA]	A series of reactions within the cell that occur as a result of a single trigger reaction or compound [goid 7242] [evidence IEA]	Interacting selectively and simultaneously with one or more signal transduction molecules, usually acting as a scaffold to bring these molecules into close proximity either using their own SH2/SH3 domains (e.g. Grb2) or those of their target molecules (e.g. SAM68) [goid 5070] [pmid 8336731] [evidence TAS]; Increases the activity of a GTPase, an enzyme that catalyzes the hydrolysis of GTP [goid 50…	CHN; ARHGAP2; RHOGAP2	CHN; ARHGAP2; RHOGAP2	CHN1	0007242; 0046872; 0005070; 0019992; 0005096	intracellular signaling cascade; metal ion binding; SH3/SH2 adaptor activity; diacylglycerol binding; GTPase activator activity	CHN1	4.26373	2.56983	-1.67442	4e-05	CHN1	5302.86	3617.51	3199.38	7071.92	8750.37	5133.44	5531.02	5710.16	5539.58	1775.96	1838.18	3368	2639.09	4048.44
1389698	CHRNA10	Homo sapiens cholinergic receptor, nicotinic, alpha 10 (CHRNA10), mRNA.	57053	NM_020402.2	NP_065135.2	11138122	ILMN_1692960	290593	S	1846	GAAAAGGGTCGGGGATTCTCAGTCGAGTTTCCAGAGCAGGAGGCCCTACA	11	-	3643442-3643491						11p15.4d	CHRNA10	The membrane surrounding a cell that separates the cell from its external environment. It consists of a phospholipid bilayer and associated proteins [goid 5886] [evidence IEA]; Penetrating at least one phospholipid bilayer of a membrane. May also refer to the state of being buried in the bilayer with no exposure outside the bilayer. When used to describe a protein, indicates that all or part of t…	The directed movement of charged atoms or small charged molecules into, out of, within or between cells [goid 6811] [evidence IEA]; The directed movement of calcium (Ca) ions into, out of, within or between cells [goid 6816] [evidence IEA]; The process of communication from a neuron to another neuron across a synapse using the neurotransmitter acetylcholine [goid 7271] [pmid 11350119] [evidence T…	[goid 4889] [evidence IEA]; Interacting selectively with one or more specific sites on a receptor molecule, a macromolecule that undergoes combination with a hormone, neurotransmitter, drug or intracellular messenger to initiate a change in cell function [goid 5102] [pmid 11350119] [evidence TAS]; Catalysis of facilitated diffusion of an ion (by an energy-independent process) by passage through a…			CHRNA10	0006811; 0006816; 0007271; 0042127; 0005262; 0005102; 0004889; 0005216; 0005509; 0005230; 0030594; 0045211; 00016021	ion transport; calcium ion transport; synaptic transmission cholinergic; regulation of cell proliferation; calcium channel activity; receptor binding; nicotinic acetylcholine-activated cation-selective channel activity; ion channel activity; calcium ion binding; extracellular ligand-gated ion channel activity; neurotransmitter receptor activity; postsynaptic membrane; integral to membrane	CHRNA10	0.05391	0.10767	1.97895	3.33795e-06	CHRNA10	70.6821	90.7538	57.786	74.2258	53.7984	50.5231	40.9447	69.9067	63.5776	15.8308	96.3028	186.012	165.746	129.594
1390003	CHST1	Homo sapiens carbohydrate (keratan sulfate Gal-6) sulfotransferase 1 (CHST1), mRNA.	8534	NM_003654.2	NP_003645.1	31542307	ILMN_1677719	2100463	S	2353	ATGGTGTCCATCCTTTCCCCATCCCTGCCTCCTGCCCCTGACGCCCATTT	11	-	45627318-45627367						11p11.2c	CHST1	The lipid bilayer surrounding any of the compartments of the Golgi apparatus [goid 139] [evidence IEA]; A compound membranous cytoplasmic organelle of eukaryotic cells, consisting of flattened, ribosome-free vesicles arranged in a more or less regular stack. The Golgi apparatus differs from the endoplasmic reticulum in often having slightly thicker membranes, appearing in sections as a characteri…	The chemical reactions and pathways involving polysaccharides, a polymer of more than 10 monosaccharide residues joined by glycosidic linkages [goid 5976] [pmid 9405439] [evidence TAS]; The chemical reactions and pathways involving galactose, the aldohexose galacto-hexose. D-galactose is widely distributed in combined form in plants, animals and microorganisms as a constituent of oligo- and polys…	Catalysis of the transfer of a group, e.g. a methyl group, glycosyl group, acyl group, phosphorus-containing, or other groups, from one compound (generally regarded as the donor) to another compound (generally regarded as the acceptor). Transferase is the systematic name for any enzyme of EC class 2 [goid 16740] [evidence IEA]; Catalysis of the reaction: 3'-phosphoadenosine 5'-phosphosulfate + ke…	KS6ST; KSGal6ST; C6ST	KS6ST; KSGal6ST; C6ST	CHST1	0042339; 0005976; 0006012; 0006954; 0016740; 0045130; 0031228; 0016021; 0005795	keratan sulfate metabolism; polysaccharide metabolism; galactose metabolism; inflammatory response; transferase activity; keratan sulfotransferase activity; intrinsic to Golgi membrane; integral to membrane; Golgi stack	CHST1	1.21714	0.77355	-1.58794	0.00439	CHST1	1593.49	1033.91	1107.52	1537.39	2440.96	1883.82	1186.94	1258.32	1505.29	473.639	542.518	805.422	498.752	959.361
1382300	CHST12	Homo sapiens carbohydrate (chondroitin 4) sulfotransferase 12 (CHST12), mRNA.	55501	NM_018641.2	NP_061111.1	20070291	ILMN_1735058	1410647	S	1964	ATTATGGCTGTTAAGGCCGGGCGGGTGACTCAGGCAGGTAATCCCAGAAC	7	+	2440547-2440596						7p22.2c	CHST12	The lipid bilayer surrounding any of the compartments of the Golgi apparatus [goid 139] [evidence IEA]; A compound membranous cytoplasmic organelle of eukaryotic cells, consisting of flattened, ribosome-free vesicles arranged in a more or less regular stack. The Golgi apparatus differs from the endoplasmic reticulum in often having slightly thicker membranes, appearing in sections as a characteri…	The chemical reactions and pathways involving carbohydrates, any of a group of organic compounds based of the general formula Cx(H2O)y. Includes the formation of carbohydrate derivatives by the addition of a carbohydrate residue to another molecule [goid 5975] [evidence IEA]; The chemical reactions and pathways resulting in the formation of dermatan sulfate, any glycosaminoglycan with repeats con…	Interacting selectively with any protein or protein complex (a complex of two or more proteins that may include other nonprotein molecules) [goid 5515] [pmid 17353931] [evidence IPI]; Catalysis of the transfer of a group, e.g. a methyl group, glycosyl group, acyl group, phosphorus-containing, or other groups, from one compound (generally regarded as the donor) to another compound (generally regar…	C4S-2; C4ST2; C4ST-2	C4S-2; C4ST2; C4ST-2	CHST12	0030208; 0005975; 0050656; 0016740; 0047756; 0030173; 0016021; 005795	dermatan sulfate biosynthesis; carbohydrate metabolism; 3'-phosphoadenosine 5'-phosphosulfate binding; transferase activity; chondroitin 4-sulfotransferase activity; integral to Golgi membrane; integral to membrane; Golgi stack	CHST12	0.67021	1.03898	1.53609	5e-05	CHST12	840.265	1083.4	810.444	713.376	651.657	683.686	863.998	863.321	813.768	137.15	902.201	2225.28	1683.18	1719.85
1384041	CHSY3	Homo sapiens chondroitin sulfate synthase 3 (CHSY3), mRNA.	337876	NM_175856.4	NP_787052.3	74271902	ILMN_1740407	1260121	S	3234	TGAGGAGTTTTGTTCCACAAGCAACCGGTACTGGCTACCCTGGTCTTATG	5	+	129549968-129550017						5q23.3c	CHSY3	A compound membranous cytoplasmic organelle of eukaryotic cells, consisting of flattened, ribosome-free vesicles arranged in a more or less regular stack. The Golgi apparatus differs from the endoplasmic reticulum in often having slightly thicker membranes, appearing in sections as a characteristic shallow semicircle so that the convex side (cis or entry face) abuts the endoplasmic reticulum, sec…		Catalysis of the transfer of a group, e.g. a methyl group, glycosyl group, acyl group, phosphorus-containing, or other groups, from one compound (generally regarded as the donor) to another compound (generally regarded as the acceptor). Transferase is the systematic name for any enzyme of EC class 2 [goid 16740] [evidence IEA]; Interacting selectively with any metal ion [goid 46872] [evidence IEA…	CSS3; CHSY2	CSS3; CHSY2	CSS3	0047238; 0050510; 0046872; 0016740; 0016021; 0005795	glucuronosyl-N-acetylgalactosaminyl-proteoglycan 4-beta-N-acetylgalactosaminyltransferase activity; N-acetylgalactosaminyl-proteoglycan 3-beta-glucuronosyltransferase activity; metal ion binding; transferase activity; integral to membrane; Golgi stack	CHSY3	0.75263	0.26693	-2.8455	0.00057	CHSY3	947.018	504.86	413.802	695.862	2488.18	1171.66	620.766	581.217	927.92	676.744	279.307	186.406	119.362	247.865
1383323	CHTF18	Homo sapiens CTF18, chromosome transmission fidelity factor 18 homolog (S. cerevisiae) (CHTF18), mRNA.	63922	NM_022092.1	NP_071375.1	27501457	ILMN_1756705	5490328	S	2763	GAGGAACAGCCTGAGAAGGACTTCTTTGGACGTGTGGTCGTCAGGAGCAC	16	+	787085-787093:787695-787735						16p13.3f	CHTF18	A membrane-bounded organelle of eukaryotic cells in which chromosomes are housed and replicated. In most cells, the nucleus contains all of the cell's chromosomes except the organellar chromosomes, and is the site of RNA synthesis and processing. In some species, or in specialized cell types, RNA metabolism or DNA replication may be absent [goid 5634] [evidence IEA]	The process whereby new strands of DNA are synthesized. The template for replication can either be an existing DNA molecule or RNA [goid 6260] [evidence IEA]; The progression of biochemical and morphological phases and events that occur in a cell during successive cell replication or nuclear replication events. Canonically, the cell cycle comprises the replication and segregation of genetic mater…	Interacting selectively with a nucleotide, any compound consisting of a nucleoside that is esterified with (ortho)phosphate or an oligophosphate at any hydroxyl group on the ribose or deoxyribose moiety [goid 166] [evidence IEA]; Interacting selectively with DNA (deoxyribonucleic acid) [goid 3677] [evidence IEA]; Interacting selectively with ATP, adenosine 5'-triphosphate, a universally important…	Ctf18; C321D2.4; CHL12; RUVBL; C321D2.2; C16orf41; C321D2.3	Ctf18; C321D2.4; CHL12; RUVBL; C321D2.2; C16orf41; C321D2.3	CHTF18	0006260; 000166; 0017111; 0004386; 0005524; 0003677; 0043234	DNA replication; nucleotide binding; nucleoside-triphosphatase activity; helicase activity; ATP binding; DNA binding; protein complex	CHTF18	0.0741	0.14516	1.94113	0.00015	CHTF18	147.364	201.07	59.853	76.0616	71.7252	92.9083	35.0839	43.2153	90.9102	56.4051	149.506	242.504	155.138	278.519
1390677	CIB2	Homo sapiens calcium and integrin binding family member 2 (CIB2), mRNA.	10518	NM_006383.2	NP_006374.1	44921612	ILMN_1714489	3940471	S	1203	TAACCCAACAGGAGGTGGTGGGGTCTGACGTGTCCAAGTGCTGGCAGACA	15	-	76184340-76184389						15q25.1a	CIB2		Any series of molecular signals generated as a consequence of an integrin binding to one of its physiological ligands [goid 7229] [evidence IEA]	Interacting selectively with calcium ions (Ca2+) [goid 5509] [evidence IEA]; Interacting selectively with any protein or protein complex (a complex of two or more proteins that may include other nonprotein molecules) [goid 5515] [pmid 9931475] [evidence TAS]; Interacting selectively with calcium ions (Ca2+) [goid 5509] [evidence IEA]	KIP2	KIP2	CIB2	0005509; 0005515	calcium ion binding; protein binding	CIB2	0.46977	0.30126	-1.57373	0.00441	CIB2	319.344	332.435	502.683	696.216	349.852	679.039	872.854	763.091	564.439	216.742	243.587	574.54	430.258	373.138
1396294	CIDEB	Homo sapiens cell death-inducing DFFA-like effector b (CIDEB), mRNA.	27141	NM_014430.1	NP_055245.1	7656978	ILMN_1668910	6110719	S	2117	CCCAGCCTGACTGCTGCTACATCTAATCCCCTACCAATGCCTCCTGTCCC	14	-	23844334-23844383						14q12a	CIDEB	The living contents of a cell; the matter contained within (but not including) the plasma membrane, usually taken to exclude large vacuoles and masses of secretory or ingested material. In eukaryotes it includes the nucleus and cytoplasm [goid 5622] [evidence IEA]; That part of the cytoplasm that does not contain membranous or particulate subcellular components [goid 5829] [pmid 12429024] [eviden…	A form of programmed cell death induced by external or internal signals that trigger the activity of proteolytic caspases, whose actions dismantle the cell and result in cell death. Apoptosis begins internally with condensation and subsequent fragmentation of the cell nucleus (blebbing) while the plasma membrane remains intact. Other characteristics of apoptosis include DNA fragmentation and the …	Interacting selectively with any protein or protein complex (a complex of two or more proteins that may include other nonprotein molecules) [goid 5515] [evidence IEA]			CIDEB	0006915; 0008630; 0006917; 0005515; 0005622; 0005829	apoptosis; DNA damage response signal transduction resulting in induction of apoptosis; induction of apoptosis; protein binding; intracellular; cytosol	CIDEB	0.08219	0.1436	1.73124	0.00014	CIDEB	128.693	124.047	121.471	85.3775	90.5041	89.4542	114.212	50.3583	100.515	26.5705	190.708	118.113	96.2214	138.633
1380714	CISD1	Homo sapiens CDGSH iron sulfur domain 1 (CISD1), mRNA.	55847	NM_018464.2	NP_060934.1	50355973	ILMN_1761781	6290598	S	373	GGGCTCACACAAAACATAACGAAGAGACTGGAGACAATGTGGGCCCTCTG	10	+	59717343-59717392						10q21.1e	CISD1	A semiautonomous, self replicating organelle that occurs in varying numbers, shapes, and sizes in the cytoplasm of virtually all eukaryotic cells. It is notably the site of tissue respiration [goid 5739] [evidence ISS]; The outer, i.e. cytoplasm-facing, lipid bilayer of the mitochondrial envelope [goid 5741] [evidence IEA]; Double layer of lipid molecules that encloses all cells, and, in eukaryot…		Interacting selectively with iron (Fe) ions [goid 5506] [evidence IEA]; Interacting selectively with any metal ion [goid 46872] [evidence IEA]; Interacting selectively with a 2 iron, 2 sulfur (2Fe-2S) cluster; this cluster consists of two iron atoms, with two inorganic sulfur atoms found between the irons and acting as bridging ligands [goid 51537] [evidence IEA]	C10orf70; MDS029; mitoNEET; ZCD1; MGC14684	C10orf70; MDS029; mitoNEET; ZCD1; MGC14684	C10orf70	5739	mitochondrion	CISD1	3.95514	2.62752	-1.51913	0.00019	CISD1	5704.99	4351.23	3361.34	6512.16	6981.05	4755.66	4551.3	4247.02	5058.09	1231.45	2752.17	2004.52	1461.44	3839.22
1393688	CLCN5	Homo sapiens chloride channel 5 (nephrolithiasis 2, X-linked, Dent disease) (CLCN5), mRNA.	1184	NM_000084.1	NP_000075.1	4557472	ILMN_1690327	3120722	S	2312	CACCCACTCTAAAGCTTCGGAACATCCTCGATCTCAGCCCCTTCACTGTG	X	+	49742154-49742203						Xp11.22c	CLCN5	The lipid bilayer surrounding any of the compartments of the Golgi apparatus [goid 139] [evidence IEA]; A membrane-bounded organelle of eukaryotic cells in which chromosomes are housed and replicated. In most cells, the nucleus contains all of the cell's chromosomes except the organellar chromosomes, and is the site of RNA synthesis and processing. In some species, or in specialized cell types, R…	The directed movement of charged atoms or small charged molecules into, out of, within or between cells [goid 6811] [evidence IEA]; The directed movement of chloride into, out of, within or between cells [goid 6821] [evidence IEA]; A type of vesicle-mediated transport in which cells take up external materials or membrane constituents by the invagination of small region of the plasma membrane to f…	Catalysis of the transmembrane transfer of an ion by a voltage-gated channel. An ion is an atom or group of atoms carrying an electric charge by virtue of having gained or lost one or more electrons [goid 5244] [evidence IEA]; Catalysis of the transmembrane transfer of a chloride ion by a voltage-gated channel [goid 5247] [evidence IEA]; Interacting selectively with chloride ions (Cl-) [goid 3140…	NPHL2; CLC5; hCIC-K2; CLCK2; DENTS; hClC-K2; XLRH; XRN	NPHL2; CLC5; hCIC-K2; CLCK2; DENTS; hClC-K2; XLRH; XRN; NPHL1	CLCN5	0006821; 0006811; 0007588; 0005247; 0016020; 0005887	chloride transport; ion transport; excretion; voltage-gated chloride channel activity; membrane; integral to plasma membrane	CLCN5	0.06104	0.03932	-1.56666	0.00055	CLCN5	72.2053	43.956	73.0687	77.0356	81.7189	76.1304	105.799	48.7417	72.332	19.2983	33.5157	17.2045	33.5596	35.7045
1385884	CLDN1	Homo sapiens claudin 1 (CLDN1), mRNA.	9076	NM_021101.3	NP_066924.1	21536297	ILMN_1724686	3190239	S	2967	GTGCTATCTGTTCAGTGATGCCCTCAGAGCTCTTGCTGTTAGCTGGCAGC	3	-	191506599-191506648						3q28c	CLDN1	The membrane surrounding a cell that separates the cell from its external environment. It consists of a phospholipid bilayer and associated proteins [goid 5886] [evidence IEA]; Penetrating at least one phospholipid bilayer of a plasma membrane. May also refer to the state of being buried in the bilayer with no exposure outside the bilayer [goid 5887] [pmid 9647647] [evidence TAS]; A belt-like reg…	The attachment of a cell, either to another cell or to an underlying substrate such as the extracellular matrix, via cell adhesion molecules [goid 7155] [pmid 9647647] [evidence TAS]; The attachment of one cell to another cell via adhesion molecules that do not require the presence of calcium for the interaction [goid 16338] [evidence ISS]; Any process by which an organism has an effect on an org…	The action of a molecule that contributes to the structural integrity of a complex or assembly within or outside a cell [goid 5198] [evidence IEA]; Interacting selectively with an identical protein or proteins [goid 42802] [evidence ISS]	SEMP1; ILVASC; CLD1	SEMP1; ILVASC; CLD1	CLDN1	0016338; 0007155; 0042802; 0005198; 0005923; 0016020; 0005887	calcium-independent cell-cell adhesion; cell adhesion; protein self binding; structural molecule activity; tight junction; membrane; integral to plasma membrane	CLDN1	0.38106	0.15513	-2.479	0.00083	CLDN1	471.014	235.711	202.407	443.932	1192.23	535.356	315.915	280.135	459.588	318.926	161.068	191.477	135.541	165.711
1391563	CLDN11	Homo sapiens claudin 11 (oligodendrocyte transmembrane protein) (CLDN11), mRNA.	5010	NM_005602.4	NP_005593.2	33598917	ILMN_1694130	3850730	S	1648	CTTTCCATGGGAAACTTTCCCTTTTGTAAGTTGAGGGCCAGGGGTAGGGA	3	+	171634072-171634121						3q26.2c	CLDN11	The membrane surrounding a cell that separates the cell from its external environment. It consists of a phospholipid bilayer and associated proteins [goid 5886] [evidence IEA]; A belt-like region of very close contact between the plasma membranes of adjacent cells so that the intercellular space is completely occluded. They occur in epithelia and brain endothelia [goid 5923] [evidence ISS]; Penet…	The attachment of a cell, either to another cell or to an underlying substrate such as the extracellular matrix, via cell adhesion molecules [goid 7155] [evidence IEA]; The process of formation of spermatozoa, including spermatocytogenesis and spermiogenesis [goid 7283] [evidence IEA]; Any process by which the axon of a neuron is insulated, and that insulation maintained, thereby preventing dispe…	The action of a molecule that contributes to the structural integrity of a complex or assembly within or outside a cell [goid 5198] [evidence IEA]; Interacting selectively with an identical protein or proteins [goid 42802] [evidence ISS]	OSP; OTM	OSP; OTM	CLDN11	0016338; 0042802; 0005198; 0005923; 0016020; 0016021	calcium-independent cell-cell adhesion; protein self binding; structural molecule activity; tight junction; membrane; integral to membrane	CLDN11	2.03647	3.32949	1.62002	0.00478	CLDN11	3426.13	3620.8	4809.93	2547.93	997.679	1537.27	1604.18	1478.68	2502.83	1335.31	5365.07	4184.67	5507.91	3412.78
1382505	CLDN15	Homo sapiens claudin 15 (CLDN15), mRNA.	24146	NM_014343.1	NP_055158.1	7656980	ILMN_1682226	3890500	I	1108	AGAACTGCTCTTGGGAAGTCGCATATCTCCCCTCTGAGGCTGGATCCCTC	7	-	100662194-100662243						7q22.1d	CLDN15	A belt-like region of very close contact between the plasma membranes of adjacent cells so that the intercellular space is completely occluded. They occur in epithelia and brain endothelia [goid 5923] [evidence IEA]; Double layer of lipid molecules that encloses all cells, and, in eukaryotes, many organelles; may be a single or double lipid bilayer; also includes associated proteins [goid 16020] …	The attachment of one cell to another cell via adhesion molecules that do not require the presence of calcium for the interaction [goid 16338] [evidence ISS]	The action of a molecule that contributes to the structural integrity of a complex or assembly within or outside a cell [goid 5198] [evidence IEA]; The action of a molecule that contributes to the structural integrity of a complex or assembly within or outside a cell [goid 5198] [evidence IEA]; Interacting selectively with an identical protein or proteins [goid 42802] [evidence ISS]	MGC19536; FLJ42715	MGC19536; FLJ42715	CLDN15	0016338; 0042802; 0005198; 0005923; 0016020; 0016021	calcium-independent cell-cell adhesion; protein self binding; structural molecule activity; tight junction; membrane; integral to membrane	CLDN15	0.3356	0.85567	2.5264	8e-05	CLDN15	601.605	932.677	293.163	326.623	357.854	297.721	228.794	220.908	407.418	243.302	748.557	923.588	2864.43	946.36
1387438	CLDN15	Homo sapiens claudin 15 (CLDN15), transcript variant 2, mRNA.	24146	NM_138429.1	NP_612438.1	20149319	ILMN_1782522	4180086	A	577	TTCCTCGGCCTCTTGCTAGGCATAGCGGGCCTGCGCTGCACCAACATTGG	7	-	100664343-100664392	1410546	I	857	CCTGGCTGCAAATCAGCCCATCGGCAGTGTTTCTTGAGCTCCCAGTAGGG	100664063-100664112	7q22.1d	CLDN15	A belt-like region of very close contact between the plasma membranes of adjacent cells so that the intercellular space is completely occluded. They occur in epithelia and brain endothelia [goid 5923] [evidence IEA]; Double layer of lipid molecules that encloses all cells, and, in eukaryotes, many organelles; may be a single or double lipid bilayer; also includes associated proteins [goid 16020] …	The attachment of one cell to another cell via adhesion molecules that do not require the presence of calcium for the interaction [goid 16338] [evidence ISS]	The action of a molecule that contributes to the structural integrity of a complex or assembly within or outside a cell [goid 5198] [evidence IEA]; The action of a molecule that contributes to the structural integrity of a complex or assembly within or outside a cell [goid 5198] [evidence IEA]; Interacting selectively with an identical protein or proteins [goid 42802] [evidence ISS]	MGC19536	MGC19536; FLJ42715	CLDN15	0016338; 0042802; 0005198; 0005923; 0016020; 00016021	calcium-independent cell-cell adhesion; protein self binding; structural molecule activity; tight junction; membrane; integral to membrane	CLDN15	0.03601	0.07557	2.0796	2e-05	CLDN15	34.6594	72.9142	19.4182	34.467	38.0283	25.3544	47.3354	44.4763	39.5816	16.2872	60.7108	110.922	144.989	129.599
1388902	CLDN5	Homo sapiens claudin 5 (transmembrane protein deleted in velocardiofacial syndrome) (CLDN5), mRNA.	7122	NM_003277.2	NP_003268.1	38570041	ILMN_1728197	6590148	S	1572	AGTGACTTGGCCTGGACCTCCCGGTCTCACTCCAGCATCTCCCCAGGCAA	22	-	17890627-17890676						22q11.21c	CLDN5	The membrane surrounding a cell that separates the cell from its external environment. It consists of a phospholipid bilayer and associated proteins [goid 5886] [evidence IEA]; A belt-like region of very close contact between the plasma membranes of adjacent cells so that the intercellular space is completely occluded. They occur in epithelia and brain endothelia [goid 5923] [evidence ISS]; Penet…	The attachment of one cell to another cell via adhesion molecules that do not require the presence of calcium for the interaction [goid 16338] [evidence ISS]	The action of a molecule that contributes to the structural integrity of a complex or assembly within or outside a cell [goid 5198] [evidence IEA]; Interacting selectively with an identical protein or proteins [goid 42802] [evidence ISS]	CPETRL1; TMVCF; BEC1; AWAL	CPETRL1; TMVCF; BEC1; AWAL	CLDN5	0016338; 0042802; 0005198; 0005923; 0016020; 0016021	calcium-independent cell-cell adhesion; protein self binding; structural molecule activity; tight junction; membrane; integral to membrane	CLDN5	2.02869	3.96157	1.93496	0.00132	CLDN5	1358.48	2741.81	1327.42	1900.13	1881.76	3801.11	3642.95	3960.55	2576.78	1106.08	2422.83	13353.6	6152.1	4892.48
1378025	CLDN9	Homo sapiens claudin 9 (CLDN9), mRNA.	9080	NM_020982.2	NP_066192.1	44680149	ILMN_1740276	5570672	S	1474	CACCTCCCCAGTAATTGTTTCCTTCCGTTGCCCAGGACACTGGCTGGCCT	16	+	3004266-3004315						16p13.3d	CLDN9	The membrane surrounding a cell that separates the cell from its external environment. It consists of a phospholipid bilayer and associated proteins [goid 5886] [evidence IEA]; A belt-like region of very close contact between the plasma membranes of adjacent cells so that the intercellular space is completely occluded. They occur in epithelia and brain endothelia [goid 5923] [evidence ISS]; Penet…	The attachment of one cell to another cell via adhesion molecules that do not require the presence of calcium for the interaction [goid 16338] [evidence ISS]	The action of a molecule that contributes to the structural integrity of a complex or assembly within or outside a cell [goid 5198] [evidence IEA]; Interacting selectively with an identical protein or proteins [goid 42802] [evidence ISS]			CLDN9	0016338; 0042802; 0005198; 0005923; 0016020; 0016021	calcium-independent cell-cell adhesion; protein self binding; structural molecule activity; tight junction; membrane; integral to membrane	CLDN9	0.07147	0.12949	1.79531	7e-05	CLDN9	73.3686	127.991	69.7257	84.7837	63.3046	105.07	94.2006	75.0683	86.689	21.5499	110.154	193.874	252.752	175.805
1391738	CLEC14A	Homo sapiens C-type lectin domain family 14, member A (CLEC14A), mRNA.	161198	NM_175060.1	NP_778230.1	28269706	ILMN_1717206	1980014	S	1620	TTTCACGAAAGCCCCTCTTCCCAGCCAAGGAAGGAGTCTATGGGCCCGCC	14	-	37793656-37793705						14q21.1a	CLEC14A	Double layer of lipid molecules that encloses all cells, and, in eukaryotes, many organelles; may be a single or double lipid bilayer; also includes associated proteins [goid 16020] [evidence IEA]; Penetrating at least one phospholipid bilayer of a membrane. May also refer to the state of being buried in the bilayer with no exposure outside the bilayer. When used to describe a protein, indicates …		The selective, often stoichiometric, interaction of a molecule with one or more specific sites on another molecule [goid 5488] [evidence IEA]; Interacting selectively with any mono-, di- or trisaccharide carbohydrate [goid 5529] [evidence IEA]	C14orf27; CEG1	C14orf27; CEG1	CLEC14A	0005529; 0016020; 0016021	sugar binding; membrane; integral to membrane	CLEC14A	0.11134	0.17782	1.58249	2e-05	CLEC14A	185.225	229.454	96.9161	134.883	98.8826	148.313	109.616	103.314	138.325	47.7136	237.444	274.946	222.336	183.275
1390387	CLEC5A	Homo sapiens C-type lectin domain family 5, member A (CLEC5A), mRNA.	23601	NM_013252.2	NP_037384.1	31747574	ILMN_1780465	1770152	S	3237	CTAGGTCAGCCAACCCCCATCCAACCCTTAGACTCACGAACAAATCCACC	7	-	141273850-141273899						7q34e	CLEC5A	Penetrating at least one phospholipid bilayer of a plasma membrane. May also refer to the state of being buried in the bilayer with no exposure outside the bilayer [goid 5887] [pmid 10449773] [evidence TAS]; Double layer of lipid molecules that encloses all cells, and, in eukaryotes, many organelles; may be a single or double lipid bilayer; also includes associated proteins [goid 16020] [evidence…	Any immune system process that functions in the calibrated response of an organism to a potential internal or invasive threat [goid 6955] [evidence IEA]; A defense response that is mediated by cells [goid 6968] [pmid 10449773] [evidence TAS]; The cascade of processes by which a signal interacts with a receptor, causing a change in the level or activity of a second messenger or other downstream ta…	The selective, often stoichiometric, interaction of a molecule with one or more specific sites on another molecule [goid 5488] [pmid 10449773] [evidence TAS]; Interacting selectively with any mono-, di- or trisaccharide carbohydrate [goid 5529] [evidence IEA]; The selective, often stoichiometric, interaction of a molecule with one or more specific sites on another molecule [goid 5488] [evidence I…	MDL1; MGC138304; CLECSF5; MDL-1	MDL1; MGC138304; CLECSF5; MDL-1	CLEC5A	0007165; 0006968; 0005488; 0004872; 0005529; 0005887	signal transduction; cellular defense response; binding; receptor activity; sugar binding; integral to plasma membrane	CLEC5A	0.07234	0.14943	2.04696	0.00043	CLEC5A	32.9964	205.549	49.4426	88.0162	101.227	88.687	70.1202	63.5493	87.4485	52.672	266.272	136.374	206.029	100.458
1394972	CLECL1	Homo sapiens C-type lectin-like 1 (CLECL1), mRNA.	160365	NM_172004.2	NP_742001.1	40548404	ILMN_1782729	3830162	S	255	CGCTGACATCAAAACTGTTCGGACTTCCCCGTTAGAACTCGCGTTTCCAC	12	-	9776823-9776872						12p13.31a	CLECL1	The membrane surrounding a cell that separates the cell from its external environment. It consists of a phospholipid bilayer and associated proteins [goid 5886] [evidence IEA]; Penetrating at least one phospholipid bilayer of a membrane. May also refer to the state of being buried in the bilayer with no exposure outside the bilayer. When used to describe a protein, indicates that all or part of t…		The selective, often stoichiometric, interaction of a molecule with one or more specific sites on another molecule [goid 5488] [evidence IEA]; Interacting selectively with any mono-, di- or trisaccharide carbohydrate [goid 5529] [evidence IEA]	DCAL1	DCAL1	DCAL1	16021	integral to membrane	CLECL1	0.07589	0.16141	2.10734	0.00641	CLECL1	43.6953	157.532	71.7113	90.7476	97.0079	50.1194	131.393	87.2005	91.1758	38.5254	364.647	39.1154	22.2014	96.452
[truncated: 1,143 more rows]
[truncated: 11 more columns]
