# Supplementary material for: Inflammatory Pathways in Parkinson's Disease; A BNE Microarray Study
Source: Parkinsons Dis. 2012 Apr 2;2012:214714. doi: 10.1155/2012/214714 (PMC3324922; doi:10.1155/2012/214714)
Supplement: Supplementary file 2 [file 214714.f2.xlsx]

## Sheet: COMP 00 (5-Dup)
Sequence ID	Symbol	Definition	Entrez_Gene_ID	Fold Change	P-value	Grunblatt et al	Hauser et al.	Zhang et al. (SN)	Moran (LSN)	Moran (MSN)	Lesnick et al.	Cantuti (Neurones)	Bossers et al	Scherzer (blood)	COUNT	FC SUM
1386351	ALDH1A1	Homo sapiens aldehyde dehydrogenase 1 family, member A1 (ALDH1A1), mRNA.	216	-2.97473	9.57431e-06	-1.35		-2.9	-4.87	-3.42	-3.83	-3.87	-1.17957		7	-24.3943
1395016	AGTR1	Homo sapiens angiotensin II receptor, type 1 (AGTR1), transcript variant 5, mRNA.	185	-4.14559	0.0005			-2.1	-3.57	-3.7	-4.34	-4.34	-1.06962		6	-23.2652
1396550	ATP8A2	Homo sapiens ATPase, aminophospholipid transporter-like, Class I, type 8A, member 2 (ATP8A2), mRNA.	51761	-2.06026	1e-05		-1.19	-1.47	-1.79	-1.63			-1.33743		5	-9.47769
1381120	ANK1	Homo sapiens ankyrin 1, erythrocytic (ANK1), transcript variant 7, mRNA.	286	-2.23133	0.00054		-1.35	-1.58	-2.34	-1.95	-1.6				5	-11.0513
1383515	CBLN1	Homo sapiens cerebellin 1 precursor (CBLN1), mRNA.	869	-2.89631	0.0048			-1.35	-2.68	-1.889	-2.34	-2.02			5	-13.1753
1384977	AP1G2	Homo sapiens adaptor-related protein complex 1, gamma 2 subunit (AP1G2), mRNA.	8906	2.11353	0.00075		1.38	1.36		1.18	1.32				4	7.35353
1394978	ANKZF1	Homo sapiens ankyrin repeat and zinc finger domain containing 1 (ANKZF1), mRNA.	55139	1.86152	9.44963e-06			1.27	1.38	1.31	1.24				4	7.06152
1380813	APBA3	Homo sapiens amyloid beta (A4) precursor protein-binding, family A, member 3 (APBA3), mRNA.	9546	1.51508	2e-05			1.22	1.17	1.21	1.21				4	6.32508
1396482	ASPH	Homo sapiens aspartate beta-hydroxylase (ASPH), transcript variant 5, mRNA.	444	-1.77637	3e-05			-1.52	1.16	1.14	1.33				4	0.33363
1383691	ACSL6	Homo sapiens acyl-CoA synthetase long-chain family member 6 (ACSL6), transcript variant 1, mRNA.	23305	-2.29362	2e-05			-1.3	-1.53	-1.25	-1.68				4	-8.05362
1387154	BEX1	Homo sapiens brain expressed, X-linked 1 (BEX1), mRNA.	55859	-1.75279	7e-05		-1.94	-1.98	-2.11	-1.7					4	-9.48279
1394569	ACHE	Homo sapiens acetylcholinesterase (YT blood group) (ACHE), transcript variant E4-E5, mRNA.	43	-1.82394	1e-05		-2.08	-1.15	-2.72	-1.96					4	-9.73394
1381832	ACOT7	Homo sapiens acyl-CoA thioesterase 7 (ACOT7), transcript variant hBACHd, mRNA.	11332	-1.79124	0.00043		-2.28	-1.26	-2.6	-2.04					4	-9.97124
1384587	P2RX7	Homo sapiens purinergic receptor P2X, ligand-gated ion channel, 7 (P2RX7), mRNA.	5027	2.19923	0.0003				2.18	1.59	1.17		2.90064		4	10.0399
1390004	AZGP1	Homo sapiens alpha-2-glycoprotein 1, zinc-binding (AZGP1), mRNA.	563	2.98542	0.00013				3.55	2.71	1.52				3	10.7654
1388633	SRRM2	Homo sapiens serine/arginine repetitive matrix 2 (SRRM2), mRNA.	23524	1.55297	2.47341e-06	1.82			1.45		2.52				3	7.34297
1389498	BOK	Homo sapiens BCL2-related ovarian killer (BOK), mRNA.	666	2.01688	2e-05				1.91	1.69	1.68				3	7.29688
1393643	ANKRD43	Homo sapiens ankyrin repeat domain 43 (ANKRD43), mRNA.	134548	2.20912	0.00413				1.65	1.4	2.02				3	7.27912
1379395	COL18A1	Homo sapiens collagen, type XVIII, alpha 1 (COL18A1), transcript variant 1, mRNA.	80781	2.57169	5.83692e-06	1.57			1.63		1.41				3	7.18169
1388543	ARHGEF2	Homo sapiens rho/rac guanine nucleotide exchange factor (GEF) 2 (ARHGEF2), mRNA.	9181	1.64311	1e-05			1.4	1.26				2.77253		3	7.07564
1378654	ARRDC2	Homo sapiens arrestin domain containing 2 (ARRDC2), transcript variant 1, mRNA.	27106	1.75426	0.00214				1.62	1.61	1.4				3	6.38426
1378609	C10orf104	Homo sapiens chromosome 10 open reading frame 104 (C10orf104), mRNA.	119504	1.51732	0.00142				1.51	1.42	1.76				3	6.20732
1387458	ACTN4	Homo sapiens actinin, alpha 4 (ACTN4), mRNA.	81	1.88202	1.54406e-07			1.64	1.44	1.23					3	6.19202
1387287	ARL17P1	Homo sapiens ADP-ribosylation factor-like 17 pseudogene 1 (ARL17P1), mRNA.	51326	1.95001	0.00218			1.26	1.31		1.55				3	6.07001
1394698	B3GAT1	Homo sapiens beta-1,3-glucuronyltransferase 1 (glucuronosyltransferase P) (B3GAT1), transcript variant 2, mRNA.	27087	1.66259	8.18223e-06			1.4	1.23	1.34					3	5.63259
1391588	ANKRD10	Homo sapiens ankyrin repeat domain 10 (ANKRD10), mRNA.	55608	1.54448	0.00666				1.46	1.38		1.24			3	5.62448
1379467	AKT2	Homo sapiens v-akt murine thymoma viral oncogene homolog 2 (AKT2), mRNA.	208	1.67877	3e-05				1.38	1.26	1.25				3	5.56877
1396450	ATM	Homo sapiens ataxia telangiectasia mutated (ATM), transcript variant 1, mRNA.	472	1.50776	0.00933			1.35		1.14	1.44				3	5.43776
1382995	ABTB1	Homo sapiens ankyrin repeat and BTB (POZ) domain containing 1 (ABTB1), transcript variant 2, mRNA.	80325	1.52182	0.00238				1.17	1.12	1.29				3	5.10182
1378186	TAL1	Homo sapiens T-cell acute lymphocytic leukemia 1 (TAL1), mRNA.	6886	1.58546	0.00195	1.67	-1.13				2.16				3	4.28546
1386502	BACH2	Homo sapiens BTB and CNC homology 1, basic leucine zipper transcription factor 2 (BACH2), mRNA.	60468	1.56595	0.00052				1.19			1.39		-1.41	3	2.73595
1383022	BRWD1	Homo sapiens bromodomain and WD repeat domain containing 1 (BRWD1), transcript variant 3, mRNA.	54014	-1.8428	0.00018				-1.69	1.92	1.3				3	-0.3128
1392291	ATRX	Homo sapiens alpha thalassemia/mental retardation syndrome X-linked (RAD54 homolog, S. cerevisiae) (ATRX), transcript variant 2, mRNA.	546	-1.57071	4e-05				-1.38			-1.39		1.38	3	-2.96071
1384244	AKAP6	Homo sapiens A kinase (PRKA) anchor protein 6 (AKAP6), mRNA.	9472	-1.62061	4e-05				-1.29	-1.23		1.1			3	-3.04061
1396989	ITSN1	Homo sapiens intersectin 1 (SH3 domain protein) (ITSN1), transcript variant 1, mRNA.	6453	-2.49552	0.00033	1.56			-1.27		-1.47				3	-3.67552
1387711	VAV3	Homo sapiens vav 3 oncogene (VAV3), mRNA.	10451	-1.95177	0.00234				-1.98		1.19		-1.33799		3	-4.07976
1384888	BBS4	Homo sapiens Bardet-Biedl syndrome 4 (BBS4), mRNA.	585	-1.55795	2.25949e-06			-1.17	-1.18		-1.29				3	-5.19795
1382161	BAG4	Homo sapiens BCL2-associated athanogene 4 (BAG4), mRNA.	9530	-1.61142	0.00135				-1.36	-1.48		-1.32			3	-5.77142
1391758	TRIM36	Homo sapiens tripartite motif-containing 36 (TRIM36), transcript variant 1, mRNA.	55521	-1.5942	0.0009	-1.42			-1.67				-1.29898		3	-5.98318
1387356	BSN	Homo sapiens bassoon (presynaptic cytomatrix protein) (BSN), mRNA.	8927	-1.57687	0.00889			-1.25	-1.81	-1.43					3	-6.06687
1378698	XK	Homo sapiens X-linked Kx blood group (McLeod syndrome) (XK), mRNA.	7504	-1.92088	0.00265		-1.56		-1.41				-1.48118		3	-6.37206
1382107	ADAM23	Homo sapiens ADAM metallopeptidase domain 23 (ADAM23), mRNA.	8745	-1.52627	0.00111				-1.91	-1.65			-1.41149		3	-6.49776
1392699	ANKRD50	Homo sapiens ankyrin repeat domain 50 (ANKRD50), mRNA.	57182	-1.76444	0.00019				-1.96	-1.53	-1.61				3	-6.86444
1392056	RGS16	Homo sapiens regulator of G-protein signalling 16 (RGS16), mRNA.	6004	-2.30999	0.00039				-1.15		-2.26		-1.21888		3	-6.93887
1383359	NR4A2	Homo sapiens nuclear receptor subfamily 4, group A, member 2 (NR4A2), transcript variant 1, mRNA.	4929	-2.95853	1.51041e-07	-1.6			-1.29				-1.19782		3	-7.04635
1396515	AKAP12	Homo sapiens A kinase (PRKA) anchor protein (gravin) 12 (AKAP12), transcript variant 2, mRNA.	9590	-1.60756	0.00295				-2.36	-1.9			-1.43019		3	-7.29775
1382936	BASP1	Homo sapiens brain abundant, membrane attached signal protein 1 (BASP1), mRNA.	10409	-1.66546	0.00225			-1.79	-2.48	-1.86					3	-7.79546
1382675	GBE1	Homo sapiens glucan (1,4-alpha-), branching enzyme 1 (glycogen branching enzyme, Andersen disease, glycogen storage disease type IV) (GBE1), mRNA.	2632	-2.36225	0.00119	-1.45			-2.83				-1.18082		3	-7.82307
1387840	B4GALT6	Homo sapiens UDP-Gal:betaGlcNAc beta 1,4- galactosyltransferase, polypeptide 6 (B4GALT6), mRNA.	9331	-2.50155	0.00023			-1.18	-2.1	-2.06					3	-7.84155
1384901	AFF3		3899	-2.25736	6.15528e-07				-2.47	-2.2	-1.16				3	-8.08736
1378577	LRDD	Homo sapiens leucine-rich repeats and death domain containing (LRDD), transcript variant 2, mRNA.	55367	2.59758	7.44201e-09				1.25				3.00201		2	6.84959
1383931	SLCO3A1	Homo sapiens solute carrier organic anion transporter family, member 3A1 (SLCO3A1), mRNA.	28232	1.64208	0.00181				2.21		2.91				2	6.76208
1396288	KLK6	Homo sapiens kallikrein-related peptidase 6 (KLK6), transcript variant A, mRNA.	5653	1.75302	0.00072						2.32		2.59638		2	6.6694
1380152	MID1IP1	Homo sapiens MID1 interacting protein 1 (gastrulation specific G12-like (zebrafish)) (MID1IP1), mRNA.	58526	1.84326	2e-05				1.46				2.85859		2	6.16185
1388979	CDKN1C	Homo sapiens cyclin-dependent kinase inhibitor 1C (p57, Kip2) (CDKN1C), mRNA.	1028	2.12724	4.49407e-06				1.94		1.94				2	6.00724
1390045	C21orf91	Homo sapiens chromosome 21 open reading frame 91 (C21orf91), mRNA.	54149	1.55378	0.00911					CX43	4.42				2	5.97378
1391146	SIRT2	Homo sapiens sirtuin (silent mating type information regulation 2 homolog) 2 (S. cerevisiae) (SIRT2), transcript variant 2, mRNA.	22933	1.58373	3e-05				1.23		3.07				2	5.88373
1392526	MYLK	Homo sapiens myosin, light polypeptide kinase (MYLK), transcript variant 5, mRNA.	4638	1.64333	0.00132				1.39		2.75				2	5.78333
1394971	SSH3	Homo sapiens slingshot homolog 3 (Drosophila) (SSH3), mRNA.	54961	1.77243	7.59751e-10				1.28				2.65876		2	5.71119
1386984	AHSA2	Homo sapiens AHA1, activator of heat shock 90kDa protein ATPase homolog 2 (yeast) (AHSA2), mRNA.	130872	2.34689	9.41382e-06				1.42		1.83				2	5.59689
1384077	SEPP1	Homo sapiens selenoprotein P, plasma, 1 (SEPP1), transcript variant 1, mRNA.	6414	1.79094	0.0034				1.57		2.12				2	5.48094
1380657	SULT1A3	Homo sapiens sulfotransferase family, cytosolic, 1A, phenol-preferring, member 3 (SULT1A3), transcript variant 2, mRNA.	6818	1.5379	8.77662e-07				1.4		2.46				2	5.3979
1397313	NPIP	Homo sapiens nuclear pore complex interacting protein (NPIP), mRNA.	9284	1.8172	0.00114				1.71		1.87				2	5.3972
1395774	FMO5	Homo sapiens flavin containing monooxygenase 5 (FMO5), mRNA.	2330	2.89263	3.54648e-06				1.22		1.1				2	5.21263
1396125	CD22	Homo sapiens CD22 molecule (CD22), mRNA.	933	2.22777	1e-05	1.6			1.28						2	5.10777
1395110	SOX10	Homo sapiens SRY (sex determining region Y)-box 10 (SOX10), mRNA.	6663	1.68234	0.00068				1.46		1.85				2	4.99234
1382932	NOL1	Homo sapiens nucleolar protein 1, 120kDa (NOL1), transcript variant 1, mRNA.	4839	1.51642	0.00025				1.33		2.04				2	4.88642
1390816	BTNL9	Homo sapiens butyrophilin-like 9 (BTNL9), mRNA.	153579	2.05454	0.00044				1.47	1.34					2	4.86454
1384527	MXD4	Homo sapiens MAX dimerization protein 4 (MXD4), mRNA.	10608	1.71903	8e-05	1.82			1.23						2	4.76903
1389621	GSDML	Homo sapiens gasdermin-like (GSDML), mRNA.	55876	1.58034	0.00868				1.16		1.97				2	4.71034
1379318	PLA2G4B	Homo sapiens phospholipase A2, group IVB (cytosolic) (PLA2G4B), mRNA.	8681	1.66126	1.43319e-06				1.22		1.79				2	4.67126
1385191	SEMA3B	Homo sapiens sema domain, immunoglobulin domain (Ig), short basic domain, secreted, (semaphorin) 3B (SEMA3B), transcript variant 2, mRNA.	7869	1.69203	0.0055				1.48		1.34				2	4.51203
1386557	ARL6IP4	Homo sapiens ADP-ribosylation-like factor 6 interacting protein 4 (ARL6IP4), transcript variant 4, mRNA.	51329	1.9842	1.65704e-08				1.22	1.28					2	4.4842
1378146	BRPF3	Homo sapiens bromodomain and PHD finger containing, 3 (BRPF3), mRNA.	27154	1.65418	2.61817e-09					1.19	1.63				2	4.47418
1385485	MYO9B	Homo sapiens myosin IXB (MYO9B), mRNA.	4650	1.94965	6.40484e-08		1.15		1.27						2	4.36965
1389826	C20orf18	Homo sapiens chromosome 20 open reading frame 18 (C20orf18), transcript variant 1, mRNA.	10616	1.59675	9.38925e-06				1.21		1.56				2	4.36675
1394673	ARL4	Homo sapiens ADP-ribosylation factor-like 4 (ARL4), transcript variant 1, mRNA.	10124	1.60616	0.00509					1.21	1.49				2	4.30616
1387099	GALNT6	Homo sapiens UDP-N-acetyl-alpha-D-galactosamine:polypeptide N-acetylgalactosaminyltransferase 6 (GalNAc-T6) (GALNT6), mRNA.	11226	1.89471	0.00128				1.28		1.13				2	4.30471
1389766	ATOH8	Homo sapiens atonal homolog 8 (Drosophila) (ATOH8), mRNA.	84913	1.85585	0.00263				1.23	1.21					2	4.29585
1397001	BTBD14A	Homo sapiens BTB (POZ) domain containing 14A (BTBD14A), mRNA.	138151	1.68557	0.00198					1.2	1.21				2	4.09557
1389643	ARS2	Homo sapiens arsenate resistance protein 2 (ARS2), transcript variant 1, mRNA.	51593	1.59779	2.60703e-07					1.27	1.22				2	4.08779
1379645	AXIN1	Homo sapiens axin 1 (AXIN1), transcript variant 2, mRNA.	8312	1.67092	6.46738e-10					1.12	1.29				2	4.08092
1378264	ABCD1	Homo sapiens ATP-binding cassette, sub-family D (ALD), member 1 (ABCD1), mRNA.	215	1.67058	0.00141				1.16	1.15					2	3.98058
1392681	BIN3	Homo sapiens bridging integrator 3 (BIN3), mRNA.	55909	1.53908	0.00012			1.28		1.13					2	3.94908
1392405	ARHGAP22	Homo sapiens Rho GTPase activating protein 22 (ARHGAP22), mRNA.	58504	1.64827	3e-05					1.16	1.12				2	3.92827
1388819	ITPR3	Homo sapiens inositol 1,4,5-triphosphate receptor, type 3 (ITPR3), mRNA.	3710	2.31177	8.59074e-07		-1.13		1.24						2	2.42177
1389419	CPT1B	Homo sapiens carnitine palmitoyltransferase 1B (muscle) (CPT1B), nuclear gene encoding mitochondrial protein, transcript variant 3, mRNA.	1375	2.36064	7.7918e-09		-1.25		1.22						2	2.33064
1390157	TMC6	Homo sapiens transmembrane channel-like 6 (TMC6), mRNA.	11322	1.98183	1e-05		-1.25		1.45						2	2.18183
1378550	TGM2	Homo sapiens transglutaminase 2 (C polypeptide, protein-glutamine-gamma-glutamyltransferase) (TGM2), transcript variant 1, mRNA.	7052	1.54562	0.00185				1.58		-1.17				2	1.95562
1390241	SLC31A2	Homo sapiens solute carrier family 31 (copper transporters), member 2 (SLC31A2), mRNA.	1318	1.81815	6e-05	-1.62			1.46						2	1.65815
1381029	ABCC5	Homo sapiens ATP-binding cassette, sub-family C (CFTR/MRP), member 5 (ABCC5), transcript variant 2, mRNA.	10057	1.52156	0.00376				-1.31		1.41				2	1.62156
1380127	TCF3	Homo sapiens transcription factor 3 (E2A immunoglobulin enhancer binding factors E12/E47) (TCF3), mRNA.	6929	1.53122	0.00383		-1.13		1.11						2	1.51122
1392916	DOCK10	Homo sapiens dedicator of cytokinesis 10 (DOCK10), mRNA.	55619	1.57789	0.00217		-1.29		1.15						2	1.43789
1391561	CRYZL1	Homo sapiens crystallin, zeta (quinone reductase)-like 1 (CRYZL1), transcript variant 2, mRNA.	9946	1.53233	0.00012				-1.47		1.2				2	1.26233
1380229	RAB6B	Homo sapiens RAB6B, member RAS oncogene family (RAB6B), mRNA.	51560	-1.7369	7e-05		1.17		1.56						2	0.9931
1385050	FBXO11	Homo sapiens F-box protein 11 (FBXO11), transcript variant 2, mRNA.	80204	-1.68985	7e-05		-1.18		1.81						2	-1.05985
1389371	UBE2V2	Homo sapiens ubiquitin-conjugating enzyme E2 variant 2 (UBE2V2), mRNA.	7336	-1.52746	0.00012				1.52				-1.49515		2	-1.50261
1382649	MAGI1	Homo sapiens membrane associated guanylate kinase, WW and PDZ domain containing 1 (MAGI1), transcript variant 2, mRNA.	9223	-1.6245	4e-05				1.21				-1.45282		2	-1.86732
1389765	RANBP9	Homo sapiens RAN binding protein 9 (RANBP9), mRNA.	10048	-1.5076	0.00158		1.18		-1.56						2	-1.8876
1389381	GNB5	Homo sapiens guanine nucleotide binding protein (G protein), beta 5 (GNB5), transcript variant 1, mRNA.	10681	-2.10262	9.32815e-08				-1.26		1.32				2	-2.04262
1382188	RIMS2	Homo sapiens regulating synaptic membrane exocytosis 2 (RIMS2), mRNA.	9699	-1.91808	7e-05				1.13				-1.54734		2	-2.33542
1394863	FABP7	Homo sapiens fatty acid binding protein 7, brain (FABP7), mRNA.	2173	-1.85503	1e-05				-1.76		1.23				2	-2.38503
1397160	CDH8	Homo sapiens cadherin 8, type 2 (CDH8), mRNA.	1006	-2.64972	0.0003		1.06		-1.2						2	-2.78972
1387265	RAB3A	Homo sapiens RAB3A, member RAS oncogene family (RAB3A), mRNA.	5864	-2.5229	0.00109		1.1						-1.46421		2	-2.88711
1395617	SLC1A4	Homo sapiens solute carrier family 1 (glutamate/neutral amino acid transporter), member 4 (SLC1A4), mRNA.	6509	-1.55376	0.00032				-1.39		-1.21				2	-4.15376
1391518	ATG7	Homo sapiens ATG7 autophagy related 7 homolog (S. cerevisiae) (ATG7), mRNA.	10533	-1.50095	0.00214					-1.3	-1.4				2	-4.20095
1396191	BZRAP1	Homo sapiens benzodiazapine receptor (peripheral) associated protein 1 (BZRAP1), mRNA.	9256	-1.50179	5e-05				-1.5	-1.27					2	-4.27179
1388152	TMEM118	Homo sapiens transmembrane protein 118 (TMEM118), mRNA.	84900	-1.57087	0.00091				-1.24				-1.52558		2	-4.33645
1379572	NRXN3	Homo sapiens neurexin 3 (NRXN3), transcript variant beta, mRNA.	9369	-1.55459	0.00172				-1.3				-1.48531		2	-4.3399
1377029	ELOVL4	Homo sapiens elongation of very long chain fatty acids (FEN1/Elo2, SUR4/Elo3, yeast)-like 4 (ELOVL4), mRNA.	6785	-1.62516	0.00714				-1.27				-1.45766		2	-4.35282
1396072	ATP2B3	Homo sapiens ATPase, Ca++ transporting, plasma membrane 3 (ATP2B3), transcript variant 1, mRNA.	492	-1.8929	0.00383				-1.26	-1.24					2	-4.3929
1387092	PFDN4	Homo sapiens prefoldin subunit 4 (PFDN4), mRNA.	5203	-1.60323	0.00011				-1.26				-1.53276		2	-4.39599
1389728	ACTC	Homo sapiens actin, alpha, cardiac muscle (ACTC), mRNA.	70	-2.15888	0.00519					-1.1	-1.19				2	-4.44888
1382626	MCF2	Homo sapiens MCF.2 cell line derived transforming sequence (MCF2), mRNA.	4168	-1.74524	0.00103				-1.42		-1.31				2	-4.47524
1395758	BNC2	Homo sapiens basonuclin 2 (BNC2), mRNA.	54796	-1.70271	1.79098e-06				-1.68	-1.12					2	-4.50271
1381290	ATP9A	Homo sapiens ATPase, class II, type 9A (ATP9A), mRNA.	10079	-1.62939	0.00188			-1.52	-1.37						2	-4.51939
1383540	ASTN1	Homo sapiens astrotactin 1 (ASTN1), transcript variant 1, mRNA.	460	-1.51753	1.79842e-09				-1.68	-1.33					2	-4.52753
1382498	SMYD3	Homo sapiens SET and MYND domain containing 3 (SMYD3), mRNA.	64754	-1.67639	0.00021		-1.12		-1.75						2	-4.54639
1383879	PPM1E	Homo sapiens protein phosphatase 1E (PP2C domain containing) (PPM1E), mRNA.	22843	-2.02663	0.00022				-1.19				-1.35749		2	-4.57412
1386129	AADACL1	Homo sapiens arylacetamide deacetylase-like 1 (AADACL1), mRNA.	57552	-1.59623	0.00435				-1.44	-1.58					2	-4.61623
1387171	ATP2B2	Homo sapiens ATPase, Ca++ transporting, plasma membrane 2 (ATP2B2), transcript variant 2, mRNA.	491	-1.5907	0.00181			-1.52		-1.51					2	-4.6207
1390772	DLD	Homo sapiens dihydrolipoamide dehydrogenase (E3 component of pyruvate dehydrogenase complex, 2-oxo-glutarate complex, branched chain keto acid dehydrogenase complex) (DLD), mRNA.	1738	-1.73466	3e-05				-1.64		-1.37				2	-4.74466
1394662	ATP5G3	Homo sapiens ATP synthase, H+ transporting, mitochondrial F0 complex, subunit c (subunit 9) isoform 3 (ATP5G3), nuclear gene encoding mitochondrial protein, transcript variant 1, mRNA.	518	-1.69979	0.00078			-1.9		-1.15					2	-4.74979
1381566	SNCA	Homo sapiens synuclein, alpha (non A4 component of amyloid precursor) (SNCA), transcript variant NACP140, mRNA.	6622	-1.48181	0.08389		-1.59		-1.81						2	-4.88181
1395839	ITPR1	Homo sapiens inositol 1,4,5-triphosphate receptor, type 1 (ITPR1), mRNA.	3708	-1.6793	4e-05				-1.85				-1.45535		2	-4.98465
1392792	SNAP91	Homo sapiens synaptosomal-associated protein, 91kDa homolog (mouse) (SNAP91), mRNA.	9892	-1.6014	0.00134				-2.05				-1.45414		2	-5.10554
1379545	TPBG	Homo sapiens trophoblast glycoprotein (TPBG), mRNA.	7162	-2.08162	0.00344				-1.86				-1.17579		2	-5.11741
1385402	TBC1D9	Homo sapiens TBC1 domain family, member 9 (with GRAM domain) (TBC1D9), mRNA.	23158	-1.95517	0.00101		-1.31		-1.95						2	-5.21517
1395332	ATP6V1C1	Homo sapiens ATPase, H+ transporting, lysosomal 42kDa, V1 subunit C1 (ATP6V1C1), transcript variant 1, mRNA.	528	-1.8866	3e-05				-1.68	-1.72					2	-5.2866
1394711	B3GALT3	Homo sapiens UDP-Gal:betaGlcNAc beta 1,3-galactosyltransferase, polypeptide 3 (B3GALT3), transcript variant 1, mRNA.	8706	-1.84042	0.00014				-1.77	-1.68					2	-5.29042
1392909	LMO3	Homo sapiens LIM domain only 3 (rhombotin-like 2) (LMO3), transcript variant 1, mRNA.	55885	-1.92317	7.33453e-07				-2				-1.40781		2	-5.33098
1395644	PFTK1	Homo sapiens PFTAIRE protein kinase 1 (PFTK1), mRNA.	5218	-2.23133	2.78245e-07				-1.76				-1.36453		2	-5.35586
1389317	LRRC49	Homo sapiens leucine rich repeat containing 49 (LRRC49), mRNA.	54839	-1.95363	1.42624e-06				-2.03				-1.49863		2	-5.48226
1380975	MDH1	Homo sapiens malate dehydrogenase 1, NAD (soluble) (MDH1), mRNA.	4190	-1.52187	0.00738				-2.62				-1.39642		2	-5.53829
1390148	CADPS	Homo sapiens Ca2+-dependent secretion activator (CADPS), transcript variant 1, mRNA.	8618	-2.80705	0.00036				-1.46				-1.33984		2	-5.60689
1387879	SNX10	Homo sapiens sorting nexin 10 (SNX10), mRNA.	29887	-1.84363	0.0002				-2.38				-1.43724		2	-5.66087
1380887	UBE2N	Homo sapiens ubiquitin-conjugating enzyme E2N (UBC13 homolog, yeast) (UBE2N), mRNA.	7334	-1.54038	0.00091				-1.95		-2.42				2	-5.91038
1385252	ELAVL2	Homo sapiens ELAV (embryonic lethal, abnormal vision, Drosophila)-like 2 (Hu antigen B) (ELAVL2), mRNA.	1993	-3.50558	0.00056				-1.25		-1.2				2	-5.95558
1380554	BTBD11	Homo sapiens BTB (POZ) domain containing 11 (BTBD11), transcript variant 1, mRNA.	121551	-1.92332	0.00035				-2.18	-1.9					2	-6.00332
1386942	NSF	Homo sapiens N-ethylmaleimide-sensitive factor (NSF), mRNA.	4905	-1.58207	0.00455				-3.04				-1.49088		2	-6.11295
1389072	REEP1	Homo sapiens receptor accessory protein 1 (REEP1), mRNA.	65055	-2.03908	0.00393				-2.97				-1.31587		2	-6.32495
1385591	FOXA1	Homo sapiens forkhead box A1 (FOXA1), mRNA.	3169	-3.95877	0.00011				-1.25				-1.17594		2	-6.38471
1382741	SMPX	Homo sapiens small muscle protein, X-linked (SMPX), mRNA.	23676	-3.74431	0.00397				-1.34				-1.31177		2	-6.39608
1394908	KLHL13	Homo sapiens kelch-like 13 (Drosophila) (KLHL13), mRNA.	90293	-3.2408	0.00109						-2.35		-1.2385		2	-6.8293
1390531	SDC1	Homo sapiens syndecan 1 (SDC1), transcript variant 2, mRNA.	6382	-2.02041	0.00038				-1.69		-3.78				2	-7.49041
1393588	SYT1	Homo sapiens synaptotagmin I (SYT1), mRNA.	6857	-3.22065	6e-05				-3.09				-1.22911		2	-7.53976
1395172	DLK1	Homo sapiens delta-like 1 homolog (Drosophila) (DLK1), mRNA.	8788	-5.78948	2e-05				-2.1				-1.2248		2	-9.11428
1378226	SLC18A2	Homo sapiens solute carrier family 18 (vesicular monoamine), member 2 (SLC18A2), mRNA.	6571	-5.653	6e-05				-4.08				-1.1589		2	-10.8919
1389135	CNTNAP4	Homo sapiens contactin associated protein-like 4 (CNTNAP4), transcript variant 1, mRNA.	85445	1.625	0.0057						4.96				1	6.585
1383028	OR7A5	Homo sapiens olfactory receptor, family 7, subfamily A, member 5 (OR7A5), mRNA.	26659	3.86569	0.00054				1.51						1	5.37569
1387424	NPTX2	Homo sapiens neuronal pentraxin II (NPTX2), mRNA.	4885	3.05376	2e-05				2.17						1	5.22376
1377350	RELN	Homo sapiens reelin (RELN), transcript variant 1, mRNA.	5649	1.70025	6e-05						3.39				1	5.09025
1383119	CA2	Homo sapiens carbonic anhydrase II (CA2), mRNA.	760	1.62238	0.00493								3.26071		1	4.88309
1390296	LOC153561	Homo sapiens hypothetical protein LOC153561 (LOC153561), mRNA.	153561	1.76197	8e-05				3.11						1	4.87197
1385110	PDGFRB	Homo sapiens platelet-derived growth factor receptor, beta polypeptide (PDGFRB), mRNA.	5159	1.72266	8.21426e-06								2.64018		1	4.36284
1386145	FLJ39653	Homo sapiens hypothetical protein FLJ39653 (FLJ39653), mRNA.	202020	2.00333	0.00073						2.35				1	4.35333
1379414	PAN2	Homo sapiens PAN2 polyA specific ribonuclease subunit homolog (S. cerevisiae) (PAN2), mRNA.	9924	2.49872	5.29082e-07						1.85				1	4.34872
1390431	BNIPL	Homo sapiens BCL2/adenovirus E1B 19kD interacting protein like (BNIPL), transcript variant 1, mRNA.	149428	3.14428	0.00045					1.1					1	4.24428
1394178	NFASC	Homo sapiens neurofascin homolog (chicken) (NFASC), transcript variant 4, mRNA.	23114	2.0748	2.15839e-08				2.07						1	4.1448
1395624	ZBTB46	Homo sapiens zinc finger and BTB domain containing 46 (ZBTB46), mRNA.	140685	1.73276	6e-05						2.4				1	4.13276
1388827	ANLN	Homo sapiens anillin, actin binding protein (ANLN), mRNA.	54443	1.60055	0.0009						2.53				1	4.13055
1384832	CDR2L	Homo sapiens cerebellar degeneration-related protein 2-like (CDR2L), mRNA.	30850	1.78702	5.13499e-06						2.31				1	4.09702
1385787	DHCR24	Homo sapiens 24-dehydrocholesterol reductase (DHCR24), mRNA.	1718	1.99353	0.00151				2.05						1	4.04353
1396077	ZBTB16	Homo sapiens zinc finger and BTB domain containing 16 (ZBTB16), transcript variant 1, mRNA.	7704	1.66937	0.00109				2.3						1	3.96937
1393789	LRCH4	Homo sapiens leucine-rich repeats and calponin homology (CH) domain containing 4 (LRCH4), mRNA.	4034	2.73884	2.59935e-06				1.2						1	3.93884
1396991	FAM38B	Homo sapiens family with sequence similarity 38, member B (FAM38B), mRNA.	63895	2.25437	3e-05				1.68						1	3.93437
1377260	HSPA2	Homo sapiens heat shock 70kDa protein 2 (HSPA2), mRNA.	3306	1.7504	0.00011						2.18				1	3.9304
1394576	CDA	Homo sapiens cytidine deaminase (CDA), mRNA.	978	2.78959	2e-05				1.12						1	3.90959
1381043	SRPK3	Homo sapiens SFRS protein kinase 3 (SRPK3), mRNA.	26576	2.70949	5e-05				1.18						1	3.88949
1387363	PACS2	Homo sapiens phosphofurin acidic cluster sorting protein 2 (PACS2), mRNA.	23241	1.76171	5.17566e-06				2.11						1	3.87171
1392415	HAPLN2	Homo sapiens hyaluronan and proteoglycan link protein 2 (HAPLN2), mRNA.	60484	2.25189	4.98658e-06				1.55						1	3.80189
1397385	LOC149134	Homo sapiens hypothetical protein LOC149134 (LOC149134), mRNA.	149134	2.05412	0.00022						1.74				1	3.79412
1395876	UGT8	Homo sapiens UDP glycosyltransferase 8 (UDP-galactose ceramide galactosyltransferase) (UGT8), mRNA.	7368	1.6677	0.00415						2.06				1	3.7277
1384310	ITGA10	Homo sapiens integrin, alpha 10 (ITGA10), mRNA.	8515	2.54425	1.15824e-06				1.16						1	3.70425
1379506	PXK	Homo sapiens PX domain containing serine/threonine kinase (PXK), mRNA.	54899	1.85035	0.00029						1.84				1	3.69035
1389064	PCTK3	Homo sapiens PCTAIRE protein kinase 3 (PCTK3), transcript variant 1, mRNA.	5129	1.87721	0.00011				1.8						1	3.67721
1379905	C21orf77	Homo sapiens chromosome 21 open reading frame 77 (C21orf77), mRNA.	55264	1.84728	0.00554						1.81				1	3.65728
1396523	ABCA2	Homo sapiens ATP-binding cassette, sub-family A (ABC1), member 2 (ABCA2), transcript variant 1, mRNA.	20	1.7449	0.00037			1.89							1	3.6349
1379715	BGN	Homo sapiens biglycan (BGN), mRNA.	633	2.0196	0.00127			1.61							1	3.6296
1387433	ZNF692	Homo sapiens zinc finger protein 692 (ZNF692), mRNA.	55657	2.21252	6.60815e-07				1.41						1	3.62252
1387297	ARHGAP9	Homo sapiens Rho GTPase activating protein 9 (ARHGAP9), mRNA.	64333	2.22095	0.00336		1.37								1	3.59095
1385633	TRABD	Homo sapiens TraB domain containing (TRABD), mRNA.	80305	1.71	1.7961e-06						1.88				1	3.59
1382505	CLDN15	Homo sapiens claudin 15 (CLDN15), mRNA.	24146	2.5264	8e-05		1.05								1	3.5764
1392495	LHPP	Homo sapiens phospholysine phosphohistidine inorganic pyrophosphate phosphatase (LHPP), mRNA.	64077	1.64984	0.00019				1.9						1	3.54984
1389210	SLC7A9	Homo sapiens solute carrier family 7 (cationic amino acid transporter, y+ system), member 9 (SLC7A9), mRNA.	11136	2.43917	0.00031				1.1						1	3.53917
1392510	RNF144	Homo sapiens ring finger protein 144 (RNF144), mRNA.	9781	1.59911	0.00135						1.92				1	3.51911
1381920	PHF16	Homo sapiens PHD finger protein 16 (PHF16), mRNA.	9767	1.60627	1.48855e-07						1.91				1	3.51627
1390125	MICAL1	Homo sapiens microtubule associated monoxygenase, calponin and LIM domain containing 1 (MICAL1), mRNA.	64780	1.55082	5.27393e-07		1.96								1	3.51082
1377170	GDPD3	Homo sapiens glycerophosphodiester phosphodiesterase domain containing 3 (GDPD3), transcript variant 1, mRNA.	79153	2.27065	0.00081				1.18						1	3.45065
1384305	TGFB1I1	Homo sapiens transforming growth factor beta 1 induced transcript 1 (TGFB1I1), transcript variant 2, mRNA.	7041	1.77038	0.00032				1.68						1	3.45038
1390204	SMTN	Homo sapiens smoothelin (SMTN), transcript variant 3, mRNA.	6525	2.2786	2e-05				1.17						1	3.4486
1389122	CPA2	Homo sapiens carboxypeptidase A2 (pancreatic) (CPA2), mRNA.	1358	2.32262	0.00255				1.11						1	3.43262
1390247	PLEKHH1	Homo sapiens pleckstrin homology domain containing, family H (with MyTH4 domain) member 1 (PLEKHH1), mRNA.	57475	1.63254	0.00835						1.8				1	3.43254
1396678	LRP2	Homo sapiens low density lipoprotein-related protein 2 (LRP2), mRNA.	4036	2.22035	0.001				1.21						1	3.43035
1385957	GUSB	Homo sapiens glucuronidase, beta (GUSB), mRNA.	2990	1.60336	8.18971e-11						1.82				1	3.42336
1389343	PAQR4	Homo sapiens progestin and adipoQ receptor family member IV (PAQR4), mRNA.	124222	2.03612	7.34682e-06				1.38						1	3.41612
1390514	NDE1	Homo sapiens nudE nuclear distribution gene E homolog 1 (A. nidulans) (NDE1), mRNA.	54820	1.9804	1e-05				1.43						1	3.4104
1377268	IL27RA	Homo sapiens interleukin 27 receptor, alpha (IL27RA), mRNA.	9466	2.18194	5.03816e-08						1.21				1	3.39194
1382780	FLJ12788	Homo sapiens hypothetical protein FLJ12788 (FLJ12788), mRNA.	64427	1.90002	4.17978e-08						1.49				1	3.39002
1391920	SLC7A7	Homo sapiens solute carrier family 7 (cationic amino acid transporter, y+ system), member 7 (SLC7A7), mRNA.	9056	1.81208	0.00122						1.56				1	3.37208
1387987	FGR	Homo sapiens Gardner-Rasheed feline sarcoma viral (v-fgr) oncogene homolog (FGR), mRNA.	2268	2.01833	2e-05				1.35						1	3.36833
1377496	PLOD3	Homo sapiens procollagen-lysine, 2-oxoglutarate 5-dioxygenase 3 (PLOD3), mRNA.	8985	1.85253	8e-05				1.5						1	3.35253
1388640	OTOS	Homo sapiens otospiralin (OTOS), mRNA.	150677	2.22874	0.0037						1.12				1	3.34874
1386307	DPEP2	Homo sapiens dipeptidase 2 (DPEP2), mRNA.	64174	2.10398	0.00038		1.23								1	3.33398
1380012	TJAP1	Homo sapiens tight junction associated protein 1 (peripheral) (TJAP1), mRNA.	93643	2.03147	2.99154e-07				1.29						1	3.32147
1387038	MAP3K11	Homo sapiens mitogen-activated protein kinase kinase kinase 11 (MAP3K11), mRNA.	4296	1.77117	5.758e-06				1.55						1	3.32117
1381526	FAM38A	Homo sapiens family with sequence similarity 38, member A (FAM38A), mRNA.	9780	1.88052	4.28504e-07				1.44						1	3.32052
1392956	FLJ25222	Homo sapiens CXYorf1-related protein (FLJ25222), mRNA.	374666	1.59421	8e-05						1.71				1	3.30421
1394618	C14orf173	Homo sapiens chromosome 14 open reading frame 173 (C14orf173), transcript variant 2, mRNA.	64423	1.91215	4.42092e-06				1.39						1	3.30215
1390611	FLJ11000	Homo sapiens hypothetical protein FLJ11000 (FLJ11000), mRNA.	55281	1.93177	0.00021				1.37						1	3.30177
1380415	CENTD3	Homo sapiens centaurin, delta 3 (CENTD3), mRNA.	64411	2.09397	3e-05				1.2						1	3.29397
1378266	ADH1A	Homo sapiens alcohol dehydrogenase 1A (class I), alpha polypeptide (ADH1A), mRNA.	124	2.16328	2.833e-06				1.13						1	3.29328
1395685	PLXNB3	Homo sapiens plexin B3 (PLXNB3), mRNA.	5365	2.09757	9e-05				1.17						1	3.26757
1388373	FLNB	Homo sapiens filamin B, beta (actin binding protein 278) (FLNB), mRNA.	2317	1.50196	0.00014	1.75									1	3.25196
1390977	ISYNA1	Homo sapiens inositol-3-phosphate synthase 1 (ISYNA1), mRNA.	51477	1.96147	0.00017				1.29						1	3.25147
1395743	ICAM2	Homo sapiens intercellular adhesion molecule 2 (ICAM2), mRNA.	3384	1.6089	0.00351				1.64						1	3.2489
1381953	LSS	Homo sapiens lanosterol synthase (2,3-oxidosqualene-lanosterol cyclase) (LSS), transcript variant 1, mRNA.	4047	1.79511	7e-05				1.44						1	3.23511
1388888	DGKD	Homo sapiens diacylglycerol kinase, delta 130kDa (DGKD), transcript variant 2, mRNA.	8527	1.52904	3.53305e-06						1.7				1	3.22904
1377422	CDK5RAP3	Homo sapiens CDK5 regulatory subunit associated protein 3 (CDK5RAP3), mRNA.	80279	1.51516	8.02087e-10						1.71				1	3.22516
1391879	ATG16L2	Homo sapiens ATG16 autophagy related 16-like 2 (S. cerevisiae) (ATG16L2), mRNA.	89849	1.86457	3e-05						1.36				1	3.22457
1383935	ZXDC	Homo sapiens ZXD family zinc finger C (ZXDC), mRNA.	79364	2.01548	4.03665e-10				1.2						1	3.21548
1395936	FOXF2	Homo sapiens forkhead box F2 (FOXF2), mRNA.	2295	1.90342	6e-05				1.31						1	3.21342
1391538	DIDO1	Homo sapiens death inducer-obliterator 1 (DIDO1), transcript variant 3, mRNA.	11083	1.86047	0.00228				1.35						1	3.21047
1389506	PTHR1	Homo sapiens parathyroid hormone receptor 1 (PTHR1), mRNA.	5745	1.87601	0.00056				1.33						1	3.20601
1395462	LAMA5	Homo sapiens laminin, alpha 5 (LAMA5), mRNA.	3911	1.91987	6.65481e-07				1.28						1	3.19987
1387686	CARD9	Homo sapiens caspase recruitment domain family, member 9 (CARD9), mRNA.	64170	1.79199	0.00597						1.4				1	3.19199
1385443	SPTBN5	Homo sapiens spectrin, beta, non-erythrocytic 5 (SPTBN5), mRNA.	51332	1.9642	0.00072						1.22				1	3.1842
1387224	DOCK6	Homo sapiens dedicator of cytokinesis 6 (DOCK6), mRNA.	57572	1.9677	5.47481e-06				1.21						1	3.1777
1383887	VIPR1	Homo sapiens vasoactive intestinal peptide receptor 1 (VIPR1), mRNA.	7433	1.94689	0.00258				1.22						1	3.16689
1381875	DLC1	Homo sapiens deleted in liver cancer 1 (DLC1), transcript variant 3, mRNA.	10395	1.66887	0.00101				1.48						1	3.14887
1376873	FXYD5	Homo sapiens FXYD domain containing ion transport regulator 5 (FXYD5), transcript variant 2, mRNA.	53827	1.8083	1.0107e-07				1.34						1	3.1483
1389935	TFEB	Homo sapiens transcription factor EB (TFEB), mRNA.	7942	1.64801	0.00129				1.5						1	3.14801
1383492	SLC6A12	Homo sapiens solute carrier family 6 (neurotransmitter transporter, betaine/GABA), member 12 (SLC6A12), mRNA.	6539	1.66626	0.00681				1.48						1	3.14626
1394430	SCARF2	Homo sapiens scavenger receptor class F, member 2 (SCARF2), transcript variant 1, mRNA.	91179	1.96225	4.15875e-06						1.18				1	3.14225
1397236	RELA	Homo sapiens v-rel reticuloendotheliosis viral oncogene homolog A (avian) (RELA), mRNA.	5970	1.66783	0.00013				1.47						1	3.13783
1381365	NES	Homo sapiens nestin (NES), mRNA.	10763	1.61671	0.00486				1.52						1	3.13671
1390903	PLXND1	Homo sapiens plexin D1 (PLXND1), mRNA.	23129	1.65298	0.00017				1.47						1	3.12298
1395167	TCIRG1	Homo sapiens T-cell, immune regulator 1, ATPase, H+ transporting, lysosomal V0 subunit A3 (TCIRG1), transcript variant 2, mRNA.	10312	1.73001	2e-05				1.38						1	3.11001
1387584	C11orf9	Homo sapiens chromosome 11 open reading frame 9 (C11orf9), transcript variant 1, mRNA.	745	1.56829	0.00102				1.54						1	3.10829
1385018	JUP	Homo sapiens junction plakoglobin (JUP), transcript variant 2, mRNA.	3728	1.84248	9.37002e-07				1.26						1	3.10248
1387304	RNF130	Homo sapiens ring finger protein 130 (RNF130), mRNA.	55819	1.54818	8e-05						1.55				1	3.09818
1383221	GAL3ST1	Homo sapiens galactose-3-O-sulfotransferase 1 (GAL3ST1), mRNA.	9514	1.90365	1e-05				1.19						1	3.09365
1392954	TAZ	Homo sapiens tafazzin (cardiomyopathy, dilated 3A (X-linked); endocardial fibroelastosis 2; Barth syndrome) (TAZ), transcript variant 4, mRNA.	6901	1.84307	1.46983e-06				1.25						1	3.09307
1381163	TAF1C	Homo sapiens TATA box binding protein (TBP)-associated factor, RNA polymerase I, C, 110kDa (TAF1C), transcript variant 2, mRNA.	9013	2.00236	1.38307e-08				1.09						1	3.09236
1384850	TRAM2	Homo sapiens translocation associated membrane protein 2 (TRAM2), mRNA.	9697	1.8494	4.55012e-09				1.24						1	3.0894
1392749	GPR44	Homo sapiens G protein-coupled receptor 44 (GPR44), mRNA.	11251	1.94747	0.00374				1.14						1	3.08747
1385807	CSF1R	Homo sapiens colony stimulating factor 1 receptor, formerly McDonough feline sarcoma viral (v-fms) oncogene homolog (CSF1R), mRNA.	1436	1.51732	0.00417	1.57									1	3.08732
1388952	UAP1L1	Homo sapiens UDP-N-acteylglucosamine pyrophosphorylase 1-like 1 (UAP1L1), mRNA.	91373	1.90349	6.91133e-09				1.18						1	3.08349
1381957	LEF1	Homo sapiens lymphoid enhancer-binding factor 1 (LEF1), mRNA.	51176	1.75917	0.00192				1.32						1	3.07917
1386020	SEMA4D	Homo sapiens sema domain, immunoglobulin domain (Ig), transmembrane domain (TM) and short cytoplasmic domain, (semaphorin) 4D (SEMA4D), mRNA.	10507	1.64484	0.00029						1.43				1	3.07484
1381763	TNFRSF14	Homo sapiens tumor necrosis factor receptor superfamily, member 14 (herpesvirus entry mediator) (TNFRSF14), mRNA.	8764	1.94017	2.98534e-08				1.12						1	3.06017
1377411	ARHGAP17	Homo sapiens Rho GTPase activating protein 17 (ARHGAP17), transcript variant 2, mRNA.	55114	1.74882	7.89278e-10						1.3				1	3.04882
1386641	MUTYH	Homo sapiens mutY homolog (E. coli) (MUTYH), mRNA.	4595	1.79674	1.20683e-08				1.25						1	3.04674
1392086	KIAA0913	Homo sapiens KIAA0913 (KIAA0913), mRNA.	23053	1.68483	6.05054e-08				1.36						1	3.04483
1379259	C7orf23	Homo sapiens chromosome 7 open reading frame 23 (C7orf23), mRNA.	79161	1.6636	0.00091						1.38				1	3.0436
1384407	LRRC1	Homo sapiens leucine rich repeat containing 1 (LRRC1), mRNA.	55227	1.73358	5e-05				1.3						1	3.03358
1385706	NUMA1	Homo sapiens nuclear mitotic apparatus protein 1 (NUMA1), mRNA.	4926	1.80159	6.35234e-10				1.23						1	3.03159
1392153	CELSR2	Homo sapiens cadherin, EGF LAG seven-pass G-type receptor 2 (flamingo homolog, Drosophila) (CELSR2), mRNA.	1952	1.64019	2e-05				1.39						1	3.03019
1392100	CAPN3	Homo sapiens calpain 3, (p94) (CAPN3), transcript variant 1, mRNA.	825	1.55287	0.00411				1.47						1	3.02287
1383152	UNC84B	Homo sapiens unc-84 homolog B (C. elegans) (UNC84B), mRNA.	25777	1.73025	2e-05				1.29						1	3.02025
1390701	NOS3	Homo sapiens nitric oxide synthase 3 (endothelial cell) (NOS3), mRNA.	4846	1.91343	0.0026				1.1						1	3.01343
1396447	MCM7	Homo sapiens minichromosome maintenance complex component 7 (MCM7), transcript variant 2, mRNA.	4176	1.55694	8e-05				1.45						1	3.00694
1378734	CDK2AP2	Homo sapiens CDK2-associated protein 2 (CDK2AP2), mRNA.	10263	1.81362	7e-05				1.19						1	3.00362
1381111	MAP3K3	Homo sapiens mitogen-activated protein kinase kinase kinase 3 (MAP3K3), transcript variant 1, mRNA.	4215	1.70239	1.03044e-10				1.3						1	3.00239
1389462	PILRB	Homo sapiens paired immunoglobin-like type 2 receptor beta (PILRB), transcript variant 2, mRNA.	29990	1.77166	0.0001				1.23						1	3.00166
1381128	VWA1	Homo sapiens von Willebrand factor A domain containing 1 (VWA1), transcript variant 1, mRNA.	64856	1.72367	3.67559e-06				1.27						1	2.99367
1384712	TUBB6	Homo sapiens tubulin, beta 6 (TUBB6), mRNA.	84617	1.51347	0.00826				1.48						1	2.99347
1396134	NXF1	Homo sapiens nuclear RNA export factor 1 (NXF1), mRNA.	10482	1.58239	9.46965e-07				1.41						1	2.99239
1397189	RASGRP2	Homo sapiens RAS guanyl releasing protein 2 (calcium and DAG-regulated) (RASGRP2), transcript variant 1, mRNA.	10235	1.82539	4.36802e-06				1.16						1	2.98539
1385940	SLC30A4	Homo sapiens solute carrier family 30 (zinc transporter), member 4 (SLC30A4), mRNA.	7782	1.84165	0.00142						1.13				1	2.97165
1389190	CYP27A1	Homo sapiens cytochrome P450, family 27, subfamily A, polypeptide 1 (CYP27A1), nuclear gene encoding mitochondrial protein, mRNA.	1593	1.69022	2.94734e-07				1.27						1	2.96022
1396984	ADARB2	Homo sapiens adenosine deaminase, RNA-specific, B2 (RED2 homolog rat) (ADARB2), mRNA.	105	1.54937	0.00769				1.41						1	2.95937
1385555	CLK2	Homo sapiens CDC-like kinase 2 (CLK2), transcript variant 2, mRNA.	1196	1.77937	2.3091e-08				1.18						1	2.95937
1396945	MYO1C	Homo sapiens myosin IC (MYO1C), mRNA.	4641	1.67883	6e-05				1.28						1	2.95883
1383168	ZNF202	Homo sapiens zinc finger protein 202 (ZNF202), mRNA.	7753	1.7984	5e-05				1.16						1	2.9584
1392642	CDK10	Homo sapiens cyclin-dependent kinase (CDC2-like) 10 (CDK10), transcript variant 3, mRNA.	8558	1.6164	6.46779e-08				1.34						1	2.9564
1376852	SPTLC2	Homo sapiens serine palmitoyltransferase, long chain base subunit 2 (SPTLC2), mRNA.	9517	1.77145	9.13184e-06						1.18				1	2.95145
1392229	CAV1	Homo sapiens caveolin 1, caveolae protein, 22kDa (CAV1), mRNA.	857	1.67954	0.00015				1.26						1	2.93954
1386764	PHACTR4	Homo sapiens phosphatase and actin regulator 4 (PHACTR4), mRNA.	65979	1.62911	6.45238e-07				1.31						1	2.93911
1376978	IKBKB	Homo sapiens inhibitor of kappa light polypeptide gene enhancer in B-cells, kinase beta (IKBKB), mRNA.	3551	1.80425	5.18707e-07				1.13						1	2.93425
1385929	ELF1	Homo sapiens E74-like factor 1 (ets domain transcription factor) (ELF1), mRNA.	1997	1.54937	0.00098		1.38								1	2.92937
1388868	FAM125B	Homo sapiens family with sequence similarity 125, member B (FAM125B), transcript variant 1, mRNA.	89853	1.58899	0.00014				1.33						1	2.91899
1376884	KLF2	Homo sapiens Kruppel-like factor 2 (lung) (KLF2), mRNA.	10365	1.60377	0.00019				1.31						1	2.91377
1378118	PTPRB	Homo sapiens protein tyrosine phosphatase, receptor type, B (PTPRB), mRNA.	5787	1.74884	0.00219						1.16				1	2.90884
1393473	SIRT7	Homo sapiens sirtuin (silent mating type information regulation 2 homolog) 7 (S. cerevisiae) (SIRT7), mRNA.	51547	1.66878	0.00026				1.24						1	2.90878
1394460	WBSCR20B	Homo sapiens Williams-Beuren Syndrome critical region protein 20 copy B (WBSCR20B), mRNA.	155400	1.55763	0.00411				1.35						1	2.90763
1393812	CCDC142	Homo sapiens coiled-coil domain containing 142 (CCDC142), mRNA.	84865	1.66552	1.35566e-06						1.24				1	2.90552
1384105	ADNP	Homo sapiens activity-dependent neuroprotector homeobox (ADNP), transcript variant 1, mRNA.	23394	1.57428	0.00548						1.33				1	2.90428
1383335	STAG3L1	Homo sapiens stromal antigen 3-like 1 (STAG3L1), transcript variant 1, mRNA.	54441	1.72092	0.00017				1.18						1	2.90092
1379570	FLNC	Homo sapiens filamin C, gamma (actin binding protein 280) (FLNC), mRNA.	2318	1.65073	0.00658				1.25						1	2.90073
1382260	TYK2	Homo sapiens tyrosine kinase 2 (TYK2), mRNA.	7297	1.5603	7.77715e-06				1.34						1	2.9003
1381564	DMWD	Homo sapiens dystrophia myotonica, WD repeat containing (DMWD), mRNA.	1762	1.67972	2e-05				1.21						1	2.88972
1385459	ANKS1A	Homo sapiens ankyrin repeat and sterile alpha motif domain containing 1A (ANKS1A), mRNA.	23294	1.56909	9.84286e-07						1.32				1	2.88909
1396341	AFG3L1	Homo sapiens AFG3 ATPase family gene 3-like 1 (yeast) (AFG3L1), transcript variant 2, mRNA.	172	1.74699	1.32828e-06						1.14				1	2.88699
1390731	LHX6	Homo sapiens LIM homeobox 6 (LHX6), transcript variant 2, mRNA.	26468	1.73246	0.00882				1.15						1	2.88246
1380604	VASH1	Homo sapiens vasohibin 1 (VASH1), mRNA.	22846	1.52238	0.00025				1.36						1	2.88238
1392957	GLT25D1	Homo sapiens glycosyltransferase 25 domain containing 1 (GLT25D1), mRNA.	79709	1.72789	2.41364e-06				1.15						1	2.87789
1386198	GCN5L2	Homo sapiens GCN5 general control of amino-acid synthesis 5-like 2 (yeast) (GCN5L2), mRNA.	2648	1.62465	0.00064				1.25						1	2.87465
1393694	LRCH3	Homo sapiens leucine-rich repeats and calponin homology (CH) domain containing 3 (LRCH3), mRNA.	84859	1.53178	0.00073				1.34						1	2.87178
1379896	SOLH	Homo sapiens small optic lobes homolog (Drosophila) (SOLH), mRNA.	6650	1.63923	0.00011				1.23						1	2.86923
1384734	FAM53B	Homo sapiens family with sequence similarity 53, member B (FAM53B), mRNA.	9679	1.64688	7e-05				1.22						1	2.86688
1395726	ZNF500	Homo sapiens zinc finger protein 500 (ZNF500), mRNA.	26048	1.61555	5.88605e-10				1.25						1	2.86555
1389664	FCHO1	Homo sapiens FCH domain only 1 (FCHO1), mRNA.	23149	1.63445	0.00015						1.23				1	2.86445
1387409	TBX3	Homo sapiens T-box 3 (ulnar mammary syndrome) (TBX3), transcript variant 2, mRNA.	6926	1.7031	0.00051				1.14						1	2.8431
1381021	ZDHHC14	Homo sapiens zinc finger, DHHC-type containing 14 (ZDHHC14), transcript variant 1, mRNA.	79683	1.5318	5.48286e-08				1.31						1	2.8418
1377706	HN1L	Homo sapiens hematological and neurological expressed 1-like (HN1L), mRNA.	90861	1.7112	0.00016				1.13						1	2.8412
1377292	H6PD	Homo sapiens hexose-6-phosphate dehydrogenase (glucose 1-dehydrogenase) (H6PD), mRNA.	9563	1.69666	0.00251				1.14						1	2.83666
1377748	PKD1	Homo sapiens polycystic kidney disease 1 (autosomal dominant) (PKD1), transcript variant 1, mRNA.	5310	1.50799	0.00011				1.32						1	2.82799
1385536	SMA4	Homo sapiens SMA4 (SMA4), mRNA.	11039	1.52762	0.00265				1.3						1	2.82762
1394602	MTMR11	Homo sapiens myotubularin related protein 11 (MTMR11), transcript variant 2, mRNA.	10903	1.58285	1.31747e-06				1.24						1	2.82285
1387931	UBA7	Homo sapiens ubiquitin-like modifier activating enzyme 7 (UBA7), mRNA.	7318	1.65105	0.0001				1.17						1	2.82105
1388769	CXXC1	Homo sapiens CXXC finger 1 (PHD domain) (CXXC1), mRNA.	30827	1.51872	0.00018				1.3						1	2.81872
1378076	RGS11	Homo sapiens regulator of G-protein signaling 11 (RGS11), transcript variant 1, mRNA.	8786	1.52908	0.00121				1.28						1	2.80908
1389154	C16orf53	Homo sapiens chromosome 16 open reading frame 53 (C16orf53), mRNA.	79447	1.60358	8.51223e-10				1.2						1	2.80358
1381198	NOTCH1	Homo sapiens Notch homolog 1, translocation-associated (Drosophila) (NOTCH1), mRNA.	4851	1.6215	1.99547e-07				1.18						1	2.8015
1381668	PDE7A	Homo sapiens phosphodiesterase 7A (PDE7A), transcript variant 2, mRNA.	5150	1.58925	0.00118				1.21						1	2.79925
1395331	SFRS16	Homo sapiens splicing factor, arginine/serine-rich 16 (SFRS16), mRNA.	11129	1.50861	3e-05				1.27						1	2.77861
1390680	C4orf32	Homo sapiens chromosome 4 open reading frame 32 (C4orf32), mRNA.	132720	1.5323	0.00214						1.24				1	2.7723
1390820	USP21	Homo sapiens ubiquitin specific peptidase 21 (USP21), transcript variant 1, mRNA.	27005	1.59709	6.96035e-06				1.17						1	2.76709
1395621	ATP13A1	Homo sapiens ATPase type 13A1 (ATP13A1), mRNA.	57130	1.57403	1.73647e-14						1.19				1	2.76403
1378810	TMEM109	Homo sapiens transmembrane protein 109 (TMEM109), mRNA.	79073	1.52201	7.02027e-07				1.24						1	2.76201
1392226	RUNX3	Homo sapiens runt-related transcription factor 3 (RUNX3), transcript variant 2, mRNA.	864	1.56675	0.00039				1.19						1	2.75675
1393352	PSPH	Homo sapiens phosphoserine phosphatase (PSPH), mRNA.	5723	1.53573	0.00045						1.22				1	2.75573
1393579	POGZ	Homo sapiens pogo transposable element with ZNF domain (POGZ), transcript variant 3, mRNA.	23126	1.64108	0.00853						1.11				1	2.75108
1386993	BCL6B	Homo sapiens B-cell CLL/lymphoma 6, member B (zinc finger protein) (BCL6B), mRNA.	255877	1.62021	0.00065					1.13					1	2.75021
1391390	ARSA	Homo sapiens arylsulfatase A (ARSA), mRNA.	410	1.58926	1.14222e-07				1.15						1	2.73926
1380527	CBS	Homo sapiens cystathionine-beta-synthase (CBS), mRNA.	875	1.52321	1.14377e-06				1.21						1	2.73321
1389306	SPSB3	Homo sapiens splA/ryanodine receptor domain and SOCS box containing 3 (SPSB3), mRNA.	90864	1.52819	4.76565e-07				1.2						1	2.72819
1397095	SGK3	Homo sapiens serum/glucocorticoid regulated kinase family, member 3 (SGK3), transcript variant 2, mRNA.	23678	1.52134	0.00507						1.19				1	2.71134
1389283	CSF1	Homo sapiens colony stimulating factor 1 (macrophage) (CSF1), transcript variant 2, mRNA.	1435	1.57122	0.00934				1.14						1	2.71122
1377721	EPC1	Homo sapiens enhancer of polycomb homolog 1 (Drosophila) (EPC1), mRNA.	80314	1.53018	0.00026						1.17				1	2.70018
1390912	CAD	Homo sapiens carbamoyl-phosphate synthetase 2, aspartate transcarbamylase, and dihydroorotase (CAD), mRNA.	790	1.52017	0.00017				1.17						1	2.69017
1389370	SOX13	Homo sapiens SRY (sex determining region Y)-box 13 (SOX13), mRNA.	9580	1.52691	1.19024e-06				1.16						1	2.68691
1385690	AOAH	Homo sapiens acyloxyacyl hydrolase (neutrophil) (AOAH), mRNA.	313	1.51883	0.00253						1.16				1	2.67883
1380525	FLJ12886	Homo sapiens hypothetical protein FLJ12886 (FLJ12886), mRNA.	56006	1.53089	0.00048				1.13						1	2.66089
1385887	SFTPC	Homo sapiens surfactant, pulmonary-associated protein C (SFTPC), mRNA.	6440	1.50661	0.00712				1.14						1	2.64661
1392803	CMKLR1	Homo sapiens chemokine-like receptor 1 (CMKLR1), mRNA.	1240	1.51291	0.00066				1.13						1	2.64291
1379227	ATXN7L2	Homo sapiens ataxin 7-like 2 (ATXN7L2), mRNA.	127002	1.50639	9.03339e-06						1.12				1	2.62639
1381471	ZNF655	Homo sapiens zinc finger protein 655 (ZNF655), transcript variant 5, mRNA.	79027	1.50911	0.00138						1.11				1	2.61911
1389268	PML	Homo sapiens promyelocytic leukemia (PML), transcript variant 1, mRNA.	5371	1.50927	0.00229				1.1						1	2.60927
1379223	GJC2	Homo sapiens gap junction protein, gamma 2, 47kDa (GJC2), mRNA.	57165	2.24554	5e-05					CX46.6					1	2.24554
1388695	CDS1	Homo sapiens CDP-diacylglycerol synthase (phosphatidate cytidylyltransferase) 1 (CDS1), mRNA.	1040	-1.59446	0.00387						2.7				1	1.10554
1396631	CRIPAK	Homo sapiens cysteine-rich PAK1 inhibitor (CRIPAK), mRNA.	285464	2.18558	3.30849e-09		-1.15								1	1.03558
1395266	SLC45A3	Homo sapiens solute carrier family 45, member 3 (SLC45A3), mRNA.	85414	2.18829	5.94391e-06						-1.19				1	0.99829
1378138	ERBB3	Homo sapiens v-erb-b2 erythroblastic leukemia viral oncogene homolog 3 (avian) (ERBB3), transcript variant 1, mRNA.	2065	2.25296	2e-05						-1.34				1	0.91296
1385941	DNASE1L2	Homo sapiens deoxyribonuclease I-like 2 (DNASE1L2), mRNA.	1775	2.09036	0.00055						-1.19				1	0.90036
1387248	TNFSF10	Homo sapiens tumor necrosis factor (ligand) superfamily, member 10 (TNFSF10), mRNA.	8743	1.86042	0.00022				-1.12						1	0.74042
1385406	TOP3B	Homo sapiens topoisomerase (DNA) III beta (TOP3B), mRNA.	8940	1.92046	1.57505e-06						-1.19				1	0.73046
1396607	LEPREL1	Homo sapiens leprecan-like 1 (LEPREL1), mRNA.	55214	1.87242	0.00225						-1.15				1	0.72242
1390153	STAT2	Homo sapiens signal transducer and activator of transcription 2, 113kDa (STAT2), mRNA.	6773	1.93426	5.6343e-07						-1.22				1	0.71426
1384269	GIMAP5	Homo sapiens GTPase, IMAP family member 5 (GIMAP5), mRNA.	55340	1.86901	0.00015		-1.18								1	0.68901
1377592	LIPE	Homo sapiens lipase, hormone-sensitive (LIPE), mRNA.	3991	2.17234	8.25424e-06						-1.51				1	0.66234
1378320	ACTN2	Homo sapiens actinin, alpha 2 (ACTN2), mRNA.	88	1.90215	7.78878e-06			-1.26							1	0.64215
1384856	PRKCDBP	Homo sapiens protein kinase C, delta binding protein (PRKCDBP), mRNA.	112464	1.74309	7e-05						-1.11				1	0.63309
1377244	ZNF192	Homo sapiens zinc finger protein 192 (ZNF192), mRNA.	7745	1.96571	9e-05						-1.35				1	0.61571
1384926	ADCY4	Homo sapiens adenylate cyclase 4 (ADCY4), mRNA.	196883	1.64149	0.00931				-1.14						1	0.50149
1380920	TEAD2	Homo sapiens TEA domain family member 2 (TEAD2), mRNA.	8463	1.61641	0.00197		-1.13								1	0.48641
1380555	CSF2RA	Homo sapiens colony stimulating factor 2 receptor, alpha, low-affinity (granulocyte-macrophage) (CSF2RA), transcript variant 6, mRNA.	1438	1.73333	0.0001						-1.25				1	0.48333
1393782	PRPF4B	Homo sapiens PRP4 pre-mRNA processing factor 4 homolog B (yeast) (PRPF4B), transcript variant 1, mRNA.	8899	1.63972	0.00614		-1.2								1	0.43972
1377519	ARHGDIB	Homo sapiens Rho GDP dissociation inhibitor (GDI) beta (ARHGDIB), mRNA.	397	1.63765	0.00358							-1.2			1	0.43765
1391453	MAGED2	Homo sapiens melanoma antigen family D, 2 (MAGED2), transcript variant 1, mRNA.	10916	1.71523	0.00053				-1.28						1	0.43523
1395307	SETDB1	Homo sapiens SET domain, bifurcated 1 (SETDB1), mRNA.	9869	1.52023	4.56247e-08		-1.1								1	0.42023
1381959	CSNK2A1	Homo sapiens casein kinase 2, alpha 1 polypeptide (CSNK2A1), transcript variant 1, mRNA.	1457	1.50776	0.00124				-1.15						1	0.35776
1380846	PDIA4	Homo sapiens protein disulfide isomerase family A, member 4 (PDIA4), mRNA.	9601	1.54598	0.00455		-1.21								1	0.33598
1388578	MGAT4C	Homo sapiens mannosyl (alpha-1,3-)-glycoprotein beta-1,4-N-acetylglucosaminyltransferase, isozyme C (putative) (MGAT4C), mRNA.	25834	-1.96133	0.00024						2.27				1	0.30867
1384688	CENTA2	Homo sapiens centaurin, alpha 2 (CENTA2), mRNA.	55803	1.57148	0.00379						-1.27				1	0.30148
1384002	RKHD1	Homo sapiens ring finger and KH domain containing 1 (RKHD1), mRNA.	399664	1.51194	2.44796e-06						-1.22				1	0.29194
1381234	PHLDB1	Homo sapiens pleckstrin homology-like domain, family B, member 1 (PHLDB1), mRNA.	23187	1.52179	0.00125						-1.24				1	0.28179
1393262	RGC32	Homo sapiens response gene to complement 32 (RGC32), mRNA.	28984	1.52322	0.00052		-1.31								1	0.21322
1380104	ADAM15	Homo sapiens ADAM metallopeptidase domain 15 (ADAM15), transcript variant 4, mRNA.	8751	1.56102	3e-05						-1.36				1	0.20102
1390352	GRN	Homo sapiens granulin (GRN), mRNA.	2896	1.50779	4.36557e-06						-1.31				1	0.19779
1393773	RPL36	Homo sapiens ribosomal protein L36 (RPL36), transcript variant 2, mRNA.	25873	-1.67846	0.0006	1.67									1	-0.00846
1395035	ZNF91	Homo sapiens zinc finger protein 91 (HPF7, HTF10) (ZNF91), mRNA.	7644	-1.52398	0.00022				1.32						1	-0.20398
1378545	PTPRO	Homo sapiens protein tyrosine phosphatase, receptor type, O (PTPRO), transcript variant 6, mRNA.	5800	-1.64302	2e-05				1.4						1	-0.24302
1394822	CCDC148	Homo sapiens coiled-coil domain containing 148 (CCDC148), mRNA.	130940	-1.59497	0.00104						1.28				1	-0.31497
1390725	VPS13A	Homo sapiens vacuolar protein sorting 13 homolog A (S. cerevisiae) (VPS13A), transcript variant B, mRNA.	23230	-1.56018	9e-05		1.08								1	-0.48018
1389914	KIAA0284	Homo sapiens KIAA0284 (KIAA0284), transcript variant 2, mRNA.	283638	-1.70082	0.00405				1.2						1	-0.50082
1377183	SNCAIP	Homo sapiens synuclein, alpha interacting protein (SNCAIP), mRNA.	9627	-1.62121	0.00115						1.12				1	-0.50121
1385973	PVR	Homo sapiens poliovirus receptor (PVR), mRNA.	5817	-1.55034	0.00069		1.04								1	-0.51034
1387079	CXorf33	Homo sapiens chromosome X open reading frame 33 (CXorf33), mRNA.	139322	-1.64262	0.00598						1.13				1	-0.51262
1383749	CLYBL	Homo sapiens citrate lyase beta like (CLYBL), mRNA.	171425	-1.64267	0.00272						1.1				1	-0.54267
1377936	SNX25	Homo sapiens sorting nexin 25 (SNX25), mRNA.	83891	-1.74744	0.0015						1.18				1	-0.56744
1378468	JUN	Homo sapiens jun oncogene (JUN), mRNA.	3725	-1.8252	0.00069				1.14						1	-0.6852
1379307	TEX9	Homo sapiens testis expressed 9 (TEX9), mRNA.	374618	-1.91293	0.00184						1.18				1	-0.73293
1395231	DUSP5	Homo sapiens dual specificity phosphatase 5 (DUSP5), mRNA.	1847	-2.05693	3e-05				1.27						1	-0.78693
1394724	AFF2	Homo sapiens AF4/FMR2 family, member 2 (AFF2), mRNA.	2334	-1.99083	9e-05				1.18						1	-0.81083
1377127	BTG2	Homo sapiens BTG family, member 2 (BTG2), mRNA.	7832	-2.14255	0.00063		1.26								1	-0.88255
1386191	GPR3	Homo sapiens G protein-coupled receptor 3 (GPR3), mRNA.	2827	-2.18057	2.3383e-06				1.18						1	-1.00057
1381307	FGF12	Homo sapiens fibroblast growth factor 12 (FGF12), transcript variant 2, mRNA.	2257	-2.5497	8.38847e-06				1.22						1	-1.3297
1379078	SEC62	Homo sapiens SEC62 homolog (S. cerevisiae) (SEC62), mRNA.	7095	-1.52486	0.00085		-1.11								1	-2.63486
1397144	MAPRE3	Homo sapiens microtubule-associated protein, RP/EB family, member 3 (MAPRE3), mRNA.	22924	-1.50113	0.00129				-1.17						1	-2.67113
1382219	TFDP2	Homo sapiens transcription factor Dp-2 (E2F dimerization partner 2) (TFDP2), mRNA.	7029	-1.52911	0.00043				-1.17						1	-2.69911
1388884	STAU2	Homo sapiens staufen, RNA binding protein, homolog 2 (Drosophila) (STAU2), mRNA.	27067	-1.50538	0.00023				-1.22						1	-2.72538
1395161	AR	Homo sapiens androgen receptor (dihydrotestosterone receptor; testicular feminization; spinal and bulbar muscular atrophy; Kennedy disease) (AR), transcript variant 1, mRNA.	367	-1.58726	0.00021				-1.15						1	-2.73726
1383528	KIAA0241	Homo sapiens KIAA0241 (KIAA0241), mRNA.	23080	-1.58937	0.00189				-1.16						1	-2.74937
1380853	EIF5A2	Homo sapiens eukaryotic translation initiation factor 5A2 (EIF5A2), mRNA.	56648	-1.67317	2.09548e-06				-1.08						1	-2.75317
1377954	SERGEF	Homo sapiens secretion regulating guanine nucleotide exchange factor (SERGEF), mRNA.	26297	-1.66074	0.00039				-1.13						1	-2.79074
1394715	CYFIP2	Homo sapiens cytoplasmic FMR1 interacting protein 2 (CYFIP2), mRNA.	26999	-1.5195	0.00066				-1.28						1	-2.7995
1393768	SLC25A22	Homo sapiens solute carrier family 25 (mitochondrial carrier: glutamate), member 22 (SLC25A22), nuclear gene encoding mitochondrial protein, mRNA.	79751	-1.57649	0.00913				-1.23						1	-2.80649
1386630	GABRA4	Homo sapiens gamma-aminobutyric acid (GABA) A receptor, alpha 4 (GABRA4), mRNA.	2557	-1.5222	0.00345								-1.28624		1	-2.80844
1391172	RAB14	Homo sapiens RAB14, member RAS oncogene family (RAB14), mRNA.	51552	-1.5214	0.00454				-1.31						1	-2.8314
1392524	GRIN1	Homo sapiens glutamate receptor, ionotropic, N-methyl D-aspartate 1 (GRIN1), transcript variant NR1-3, mRNA.	2902	-1.70592	0.00604				-1.13						1	-2.83592
1385967	PAM	Homo sapiens peptidylglycine alpha-amidating monooxygenase (PAM), transcript variant 3, mRNA.	5066	-1.56507	0.00314				-1.28						1	-2.84507
1377876	KLHL7	Homo sapiens kelch-like 7 (Drosophila) (KLHL7), transcript variant 1, mRNA.	55975	-1.66847	1.37152e-09				-1.19						1	-2.85847
1389294	GUCA1A	Homo sapiens guanylate cyclase activator 1A (retina) (GUCA1A), mRNA.	2978	-1.75978	0.00041				-1.1						1	-2.85978
1378973	NIPSNAP1	Homo sapiens nipsnap homolog 1 (C. elegans) (NIPSNAP1), mRNA.	8508	-1.66994	0.00148				-1.19						1	-2.85994
1396014	KCTD9	Homo sapiens potassium channel tetramerisation domain containing 9 (KCTD9), mRNA.	54793	-1.52821	0.00018				-1.34						1	-2.86821
1386832	CRY2	Homo sapiens cryptochrome 2 (photolyase-like) (CRY2), mRNA.	1408	-1.57064	2e-05						-1.3				1	-2.87064
1379692	ANKDD1A	Homo sapiens ankyrin repeat and death domain containing 1A (ANKDD1A), mRNA.	348094	-1.59473	4.16865e-06				-1.28						1	-2.87473
1388146	BCAS4	Homo sapiens breast carcinoma amplified sequence 4 (BCAS4), transcript variant 1, mRNA.	55653	-1.66941	0.00056						-1.21				1	-2.87941
1386518	AMIGO1	Homo sapiens adhesion molecule with Ig-like domain 1 (AMIGO1), mRNA.	57463	-1.61718	0.00063					-1.27					1	-2.88718
1385564	AQP11	Homo sapiens aquaporin 11 (AQP11), mRNA.	282679	-1.68136	0.00031					-1.21					1	-2.89136
1377333	CTNNA2	Homo sapiens catenin (cadherin-associated protein), alpha 2 (CTNNA2), mRNA.	1496	-1.54874	2.75682e-06				-1.37						1	-2.91874
1392022	SFXN1	Homo sapiens sideroflexin 1 (SFXN1), mRNA.	94081	-1.52391	6.35683e-06				-1.4						1	-2.92391
1390026	CACNA2D3	Homo sapiens calcium channel, voltage-dependent, alpha 2/delta subunit 3 (CACNA2D3), mRNA.	55799	-1.56065	0.00349				-1.37						1	-2.93065
1377419	RGS6	Homo sapiens regulator of G-protein signalling 6 (RGS6), mRNA.	9628	-1.76707	0.00074				-1.17						1	-2.93707
1377603	SFTPD	Homo sapiens surfactant protein D (SFTPD), mRNA.	6441	-1.81944	0.00482				-1.12						1	-2.93944
1392235	CDH10	Homo sapiens cadherin 10, type 2 (T2-cadherin) (CDH10), mRNA.	1008	-1.54711	1.65812e-10				-1.4						1	-2.94711
1383293	LASS6	Homo sapiens LAG1 homolog, ceramide synthase 6 (LASS6), mRNA.	253782	-1.8395	0.00079		-1.11								1	-2.9495
1378445	C1orf165	Homo sapiens chromosome 1 open reading frame 165 (C1orf165), mRNA.	79656	-1.65983	0.00039				-1.29						1	-2.94983
1394648	GABRB3	Homo sapiens gamma-aminobutyric acid (GABA) A receptor, beta 3 (GABRB3), transcript variant 1, mRNA.	2562	-1.853	2.62375e-07				-1.1						1	-2.953
1397243	DDAH1	Homo sapiens dimethylarginine dimethylaminohydrolase 1 (DDAH1), mRNA.	23576	-1.53313	0.0001				-1.42						1	-2.95313
1395872	MGC4172	Homo sapiens short-chain dehydrogenase/reductase (MGC4172), mRNA.	79154	-1.78663	0.00074				-1.17						1	-2.95663
1391540	AKAP9	Homo sapiens A kinase (PRKA) anchor protein (yotiao) 9 (AKAP9), transcript variant 4, mRNA.	10142	-1.69887	5e-05				-1.27						1	-2.96887
1377101	SPA17	Homo sapiens sperm autoantigenic protein 17 (SPA17), mRNA.	53340	-1.78667	2.50402e-07		-1.19								1	-2.97667
1379286	DISP2	Homo sapiens dispatched homolog 2 (Drosophila) (DISP2), mRNA.	85455	-1.70555	0.0007						-1.28				1	-2.98555
1387979	CACNB2	Homo sapiens calcium channel, voltage-dependent, beta 2 subunit (CACNB2), transcript variant 8, mRNA.	783	-1.71774	0.00141				-1.28						1	-2.99774
1383136	RUNDC3B	Homo sapiens RUN domain containing 3B (RUNDC3B), mRNA.	154661	-1.58467	0.00056				-1.42						1	-3.00467
1377278	SYNGR1	Homo sapiens synaptogyrin 1 (SYNGR1), transcript variant 1a, mRNA.	9145	-1.6686	0.00051				-1.34						1	-3.0086
1379918	RNF128	Homo sapiens ring finger protein 128 (RNF128), transcript variant 2, mRNA.	79589	-1.65184	0.0008				-1.36						1	-3.01184
1393045	BM88	Homo sapiens BM88 antigen (BM88), mRNA.	51286	-1.64505	0.00346		-1.37								1	-3.01505
1379199	GSG1L	Homo sapiens GSG1-like (GSG1L), mRNA.	146395	-1.69534	0.00309						-1.32				1	-3.01534
1390275	PLAA	Homo sapiens phospholipase A2-activating protein (PLAA), transcript variant 2, mRNA.	9373	-1.81794	0.00013				-1.2						1	-3.01794
1394759	FAM43B	Homo sapiens family with sequence similarity 43, member B (FAM43B), mRNA.	163933	-1.69279	0.00691						-1.34				1	-3.03279
1393237	FLJ10986	Homo sapiens hypothetical protein FLJ10986 (FLJ10986), mRNA.	55277	-1.64286	0.00741				-1.39						1	-3.03286
1384847	NQO2	Homo sapiens NAD(P)H dehydrogenase, quinone 2 (NQO2), mRNA.	4835	-1.58193	0.0035				-1.46						1	-3.04193
1380630	PSEN2	Homo sapiens presenilin 2 (Alzheimer disease 4) (PSEN2), transcript variant 2, mRNA.	5664	-1.65692	0.00107				-1.39						1	-3.04692
1395234	F12	Homo sapiens coagulation factor XII (Hageman factor) (F12), mRNA.	2161	-1.9023	0.0016				-1.15						1	-3.0523
1378884	CRMP1	Homo sapiens collapsin response mediator protein 1 (CRMP1), transcript variant 1, mRNA.	1400	-1.77357	4e-05				-1.28						1	-3.05357
1388569	RBKS	Homo sapiens ribokinase (RBKS), mRNA.	64080	-1.69658	9e-05				-1.36						1	-3.05658
1384157	COPS8	Homo sapiens COP9 constitutive photomorphogenic homolog subunit 8 (Arabidopsis) (COPS8), transcript variant 2, mRNA.	10920	-1.51328	0.00057				-1.55						1	-3.06328
1395489	MYO5A	Homo sapiens myosin VA (heavy polypeptide 12, myoxin) (MYO5A), mRNA.	4644	-1.63235	0.00014								-1.44143		1	-3.07378
1390297	SOX6	Homo sapiens SRY (sex determining region Y)-box 6 (SOX6), transcript variant 1, mRNA.	55553	-1.83572	6.23505e-06						-1.24				1	-3.07572
1394534	MAP2	Homo sapiens microtubule-associated protein 2 (MAP2), transcript variant 2, mRNA.	4133	-1.9171	6e-05				-1.16						1	-3.0771
1391964	PPARGC1A	Homo sapiens peroxisome proliferative activated receptor, gamma, coactivator 1, alpha (PPARGC1A), mRNA.	10891	-1.71631	6e-05				-1.37						1	-3.08631
1382806	GNAL	Homo sapiens guanine nucleotide binding protein (G protein), alpha activating activity polypeptide, olfactory type (GNAL), transcript variant 1, mRNA.	2774	-1.59894	0.00078				-1.51						1	-3.10894
1385470	RTN2	Homo sapiens reticulon 2 (RTN2), transcript variant 4, mRNA.	6253	-1.69769	0.00256						-1.42				1	-3.11769
1395010	TRPV2	Homo sapiens transient receptor potential cation channel, subfamily V, member 2 (TRPV2), mRNA.	51393	-1.92077	0.00187				-1.2						1	-3.12077
1387761	INSM1	Homo sapiens insulinoma-associated 1 (INSM1), mRNA.	3642	-1.79777	0.00226				-1.33						1	-3.12777
1384718	UQCRB	Homo sapiens ubiquinol-cytochrome c reductase binding protein (UQCRB), mRNA.	7381	-1.54195	0.00262				-1.59						1	-3.13195
1393644	SV2A	Homo sapiens synaptic vesicle glycoprotein 2A (SV2A), mRNA.	9900	-1.83197	0.00034								-1.30033		1	-3.1323
1396428	GPR61	Homo sapiens G protein-coupled receptor 61 (GPR61), mRNA.	83873	-1.86543	0.00652						-1.27				1	-3.13543
1390184	TRAF3IP1	Homo sapiens TNF receptor-associated factor 3 interacting protein 1 (TRAF3IP1), mRNA.	26146	-2.07952	4.78972e-09				-1.07						1	-3.14952
1391268	AMMECR1	Homo sapiens Alport syndrome, mental retardation, midface hypoplasia and elliptocytosis chromosomal region, gene 1 (AMMECR1), transcript variant 1, mRNA.	9949	-1.88859	3e-05					-1.27					1	-3.15859
1390291	RBM9	Homo sapiens RNA binding motif protein 9 (RBM9), transcript variant 1, mRNA.	23543	-1.66957	0.00327				-1.49						1	-3.15957
1378466	ANK2	Homo sapiens ankyrin 2, neuronal (ANK2), transcript variant 2, mRNA.	287	-1.58278	3.57785e-07				-1.58						1	-3.16278
1383918	CAP2	Homo sapiens CAP, adenylate cyclase-associated protein, 2 (yeast) (CAP2), mRNA.	10486	-1.56405	0.00286				-1.6						1	-3.16405
1397239	OCRL	Homo sapiens oculocerebrorenal syndrome of Lowe (OCRL), transcript variant a, mRNA.	4952	-1.65202	0.00089								-1.51789		1	-3.16991
1391350	GPC5	Homo sapiens glypican 5 (GPC5), mRNA.	2262	-1.67379	0.00173				-1.5						1	-3.17379
1396296	TMEM22	Homo sapiens transmembrane protein 22 (TMEM22), mRNA.	80723	-1.57127	0.00113				-1.61						1	-3.18127
1390110	HMGCS1	Homo sapiens 3-hydroxy-3-methylglutaryl-Coenzyme A synthase 1 (soluble) (HMGCS1), mRNA.	3157	-1.55627	3e-05				-1.63						1	-3.18627
1381243	SLC24A3	Homo sapiens solute carrier family 24 (sodium/potassium/calcium exchanger), member 3 (SLC24A3), mRNA.	57419	-1.79139	8.62113e-06				-1.41						1	-3.20139
1389469	PFKM	Homo sapiens phosphofructokinase, muscle (PFKM), mRNA.	5213	-1.50225	0.00262				-1.71						1	-3.21225
1396655	NAG6	Homo sapiens hypothetical protein DKFZp434G156 (NAG6), mRNA.	64753	-1.69253	0.00049						-1.52				1	-3.21253
1383755	BFSP1	Homo sapiens beaded filament structural protein 1, filensin (BFSP1), mRNA.	631	-2.02731	0.0095						-1.19				1	-3.21731
1376912	MPPED2	Homo sapiens metallophosphoesterase domain containing 2 (MPPED2), mRNA.	744	-1.60406	0.00024				-1.63						1	-3.23406
1386451	VRK1	Homo sapiens vaccinia related kinase 1 (VRK1), mRNA.	7443	-1.71476	0.00015				-1.52						1	-3.23476
1393235	ME1	Homo sapiens malic enzyme 1, NADP(+)-dependent, cytosolic (ME1), mRNA.	4199	-1.6771	4.00344e-10				-1.57						1	-3.2471
1392393	OGDHL	Homo sapiens oxoglutarate dehydrogenase-like (OGDHL), mRNA.	55753	-1.78479	0.00084				-1.49						1	-3.27479
1387837	HSPA4L	Homo sapiens heat shock 70kDa protein 4-like (HSPA4L), mRNA.	22824	-1.79726	0.00202								-1.48323		1	-3.28049
1388885	STS-1	Homo sapiens Cbl-interacting protein Sts-1 (STS-1), mRNA.	84959	-1.90296	0.00327								-1.37826		1	-3.28122
1385505	RGS17	Homo sapiens regulator of G-protein signaling 17 (RGS17), mRNA.	26575	-1.84332	2e-05						-1.5				1	-3.34332
1377779	PAIP1	Homo sapiens poly(A) binding protein interacting protein 1 (PAIP1), transcript variant 1, mRNA.	10605	-1.54471	0.00341				-1.8						1	-3.34471
1394811	EN1	Homo sapiens engrailed homolog 1 (EN1), mRNA.	2019	-2.11466	0.00142				-1.24						1	-3.35466
1382417	PTPN4	Homo sapiens protein tyrosine phosphatase, non-receptor type 4 (megakaryocyte) (PTPN4), mRNA.	5775	-1.84451	5.99576e-09								-1.53116		1	-3.37567
1382935	NRIP3	Homo sapiens nuclear receptor interacting protein 3 (NRIP3), mRNA.	56675	-1.69619	5e-05				-1.68						1	-3.37619
1394271	KIF3A	Homo sapiens kinesin family member 3A (KIF3A), mRNA.	11127	-1.74101	0.0001				-1.64						1	-3.38101
1390704	OPCML	Homo sapiens opioid binding protein/cell adhesion molecule-like (OPCML), transcript variant 2, mRNA.	4978	-1.62318	0.00192				-1.77						1	-3.39318
1379248	OPA1	Homo sapiens optic atrophy 1 (autosomal dominant) (OPA1), nuclear gene encoding mitochondrial protein, transcript variant 6, mRNA.	4976	-1.78447	0.00037				-1.61						1	-3.39447
1395941	SLITRK5	Homo sapiens SLIT and NTRK-like family, member 5 (SLITRK5), mRNA.	26050	-1.85089	1.73785e-06				-1.57						1	-3.42089
1383909	PBX1	Homo sapiens pre-B-cell leukemia homeobox 1 (PBX1), mRNA.	5087	-2.01472	2e-05				-1.41						1	-3.42472
1396844	KIAA0672	Homo sapiens KIAA0672 gene product (KIAA0672), mRNA.	9912	-1.56784	0.00364				-1.86						1	-3.42784
1386175	C5orf13	Homo sapiens chromosome 5 open reading frame 13 (C5orf13), mRNA.	9315	-1.6012	0.00139				-1.83						1	-3.4312
1389313	FAM130A2	Homo sapiens family with sequence similarity 130, member A2 (FAM130A2), mRNA.	80034	-2.06307	2.36468e-08				-1.37						1	-3.43307
1393983	CDK5R2	Homo sapiens cyclin-dependent kinase 5, regulatory subunit 2 (p39) (CDK5R2), mRNA.	8941	-2.24382	0.00043				-1.2						1	-3.44382
1382032	CRYGD	Homo sapiens crystallin, gamma D (CRYGD), mRNA.	1421	-2.31429	0.0095				-1.13						1	-3.44429
1392367	CACNA2D2	Homo sapiens calcium channel, voltage-dependent, alpha 2/delta subunit 2 (CACNA2D2), transcript variant 1, mRNA.	9254	-2.01857	2e-05				-1.43						1	-3.44857
1394172	RIMBP2	Homo sapiens RIMS binding protein 2 (RIMBP2), mRNA.	23504	-2.14858	2.10423e-10				-1.31						1	-3.45858
1390675	HTR2A	Homo sapiens 5-hydroxytryptamine (serotonin) receptor 2A (HTR2A), mRNA.	3356	-2.23074	3e-05				-1.24						1	-3.47074
1384380	GRIA1	Homo sapiens glutamate receptor, ionotropic, AMPA 1 (GRIA1), mRNA.	2890	-2.03524	8e-05				-1.45						1	-3.48524
1387339	THY1	Homo sapiens Thy-1 cell surface antigen (THY1), mRNA.	7070	-1.63923	0.00858				-1.85						1	-3.48923
1388211	RIMS3	Homo sapiens regulating synaptic membrane exocytosis 3 (RIMS3), mRNA.	9783	-1.92549	2e-05								-1.57288		1	-3.49837
1397360	SHANK2	Homo sapiens SH3 and multiple ankyrin repeat domains 2 (SHANK2), transcript variant 1, mRNA.	22941	-2.07119	4e-05				-1.45						1	-3.52119
1382186	C14orf2	Homo sapiens chromosome 14 open reading frame 2 (C14orf2), mRNA.	9556	-1.54143	0.00018				-1.99						1	-3.53143
1385441	CSPG3	Homo sapiens chondroitin sulfate proteoglycan 3 (neurocan) (CSPG3), mRNA.	1463	-1.71108	0.00341						-1.83				1	-3.54108
1381364	PLCB1	Homo sapiens phospholipase C, beta 1 (phosphoinositide-specific) (PLCB1), transcript variant 2, mRNA.	23236	-1.8687	4.16643e-09				-1.69						1	-3.5587
1384108	DYNLT3	Homo sapiens dynein, light chain, Tctex-type 3 (DYNLT3), mRNA.	6990	-1.56759	0.00493				-2						1	-3.56759
1378332	RGS7	Homo sapiens regulator of G-protein signalling 7 (RGS7), mRNA.	6000	-1.90812	8e-05				-1.66						1	-3.56812
1387994	NRXN1	Homo sapiens neurexin 1 (NRXN1), transcript variant alpha, mRNA.	9378	-1.91206	3e-05				-1.66						1	-3.57206
1389605	GPM6A	Homo sapiens glycoprotein M6A (GPM6A), transcript variant 2, mRNA.	2823	-1.62499	0.00043				-1.95						1	-3.57499
1394850	PPP2R2B	Homo sapiens protein phosphatase 2 (formerly 2A), regulatory subunit B, beta isoform (PPP2R2B), transcript variant 1, mRNA.	5521	-1.76519	0.00168				-1.81						1	-3.57519
1393372	CNIH3	Homo sapiens cornichon homolog 3 (Drosophila) (CNIH3), mRNA.	149111	-2.11707	0.00343				-1.47						1	-3.58707
1396728	PIAS2	Homo sapiens protein inhibitor of activated STAT, 2 (PIAS2), transcript variant alpha, mRNA.	9063	-2.18723	0.00035				-1.4						1	-3.58723
1396138	NUDT11	Homo sapiens nudix (nucleoside diphosphate linked moiety X)-type motif 11 (NUDT11), mRNA.	55190	-2.10005	0.00044								-1.52497		1	-3.62502
1381546	INSM2	Homo sapiens insulinoma-associated 2 (INSM2), mRNA.	84684	-2.23129	0.00072								-1.40087		1	-3.63216
1394773	NME5	Homo sapiens non-metastatic cells 5, protein expressed in (nucleoside-diphosphate kinase) (NME5), mRNA.	8382	-2.09294	7.17965e-12				-1.54						1	-3.63294
1389103	BSCL2	Homo sapiens Bernardinelli-Seip congenital lipodystrophy 2 (seipin) (BSCL2), mRNA.	26580	-1.50484	0.00189				-2.13						1	-3.63484
1391661	TSPAN13	Homo sapiens tetraspanin 13 (TSPAN13), mRNA.	27075	-1.70441	0.00733				-1.95						1	-3.65441
1386994	DENR	Homo sapiens density-regulated protein (DENR), mRNA.	8562	-1.55566	1.77373e-08				-2.1						1	-3.65566
1387499	CD6	Homo sapiens CD6 molecule (CD6), mRNA.	923	-1.92728	0.00324						-1.73				1	-3.65728
1396647	ERBB4	Homo sapiens v-erb-a erythroblastic leukemia viral oncogene homolog 4 (avian) (ERBB4), mRNA.	2066	-2.04725	6.58885e-07				-1.62						1	-3.66725
1395117	ZNF385D	Homo sapiens zinc finger protein 385D (ZNF385D), mRNA.	79750	-2.54143	1.82867e-07				-1.14						1	-3.68143
1378651	GNG3	Homo sapiens guanine nucleotide binding protein (G protein), gamma 3 (GNG3), mRNA.	2785	-1.90672	0.00146				-1.78						1	-3.68672
1390258	ECE2	Homo sapiens endothelin converting enzyme 2 (ECE2), transcript variant 1, mRNA.	9718	-1.94789	2e-05						-1.77				1	-3.71789
1390774	RND1	Homo sapiens Rho family GTPase 1 (RND1), mRNA.	27289	-2.56116	0.00014				-1.16						1	-3.72116
1382252	CACNA1G	Homo sapiens calcium channel, voltage-dependent, T type, alpha 1G subunit (CACNA1G), transcript variant 3, mRNA.	8913	-2.3697	2.77573e-09				-1.36						1	-3.7297
1392611	LPPR4	Homo sapiens plasticity related gene 1 (LPPR4), mRNA.	9890	-2.21007	0.00112				-1.54						1	-3.75007
1391586	MAP3K9	Homo sapiens mitogen-activated protein kinase kinase kinase 9 (MAP3K9), mRNA.	4293	-1.77459	0.00306				-1.99						1	-3.76459
1393067	HMP19	Homo sapiens HMP19 protein (HMP19), mRNA.	51617	-1.93184	0.00169				-1.86						1	-3.79184
1393059	EPHA5	Homo sapiens EPH receptor A5 (EPHA5), transcript variant 1, mRNA.	2044	-2.54281	5.29221e-06				-1.26						1	-3.80281
1378475	GABRB1	Homo sapiens gamma-aminobutyric acid (GABA) A receptor, beta 1 (GABRB1), mRNA.	2560	-1.7729	2.24521e-06				-2.09						1	-3.8629
1389652	KIAA0319	Homo sapiens KIAA0319 (KIAA0319), mRNA.	9856	-2.2299	3.87581e-08				-1.64						1	-3.8699
1386647	GPR161	Homo sapiens G protein-coupled receptor 161 (GPR161), transcript variant 2, mRNA.	23432	-2.3069	1e-05				-1.62						1	-3.9269
1379629	CHN1	Homo sapiens chimerin (chimaerin) 1 (CHN1), transcript variant 1, mRNA.	1123	-1.67442	4e-05				-2.27						1	-3.94442
1384300	SUB1	Homo sapiens SUB1 homolog (S. cerevisiae) (SUB1), mRNA.	10923	-1.52805	2.72926e-10				-2.42						1	-3.94805
1392584	SEMA3E	Homo sapiens sema domain, immunoglobulin domain (Ig), short basic domain, secreted, (semaphorin) 3E (SEMA3E), mRNA.	9723	-1.78409	9.10103e-08						-2.17				1	-3.95409
1385679	GUCY1B3	Homo sapiens guanylate cyclase 1, soluble, beta 3 (GUCY1B3), mRNA.	2983	-2.06361	9e-05				-1.91						1	-3.97361
1378059	SYNJ1	Homo sapiens synaptojanin 1 (SYNJ1), transcript variant 2, mRNA.	8867	-1.81683	9.39301e-08				-2.16						1	-3.97683
1377043	NDUFA5	Homo sapiens NADH dehydrogenase (ubiquinone) 1 alpha subcomplex, 5, 13kDa (NDUFA5), nuclear gene encoding mitochondrial protein, mRNA.	4698	-2.03191	2.53237e-06				-1.96						1	-3.99191
1393710	LRRN3	Homo sapiens leucine rich repeat neuronal 3 (LRRN3), mRNA.	54674	-2.34626	3.08139e-06				-1.66						1	-4.00626
1380202	CNTN6	Homo sapiens contactin 6 (CNTN6), mRNA.	27255	-2.84715	6e-05				-1.18						1	-4.02715
1395892	SDC2	Homo sapiens syndecan 2 (SDC2), mRNA.	6383	-2.23407	0.00011				-1.8						1	-4.03407
1378386	PID1	Homo sapiens phosphotyrosine interaction domain containing 1 (PID1), mRNA.	55022	-1.99881	0.0007				-2.08						1	-4.07881
1386714	NCAPG	Homo sapiens non-SMC condensin I complex, subunit G (NCAPG), mRNA.	64151	-3.00739	2e-05				-1.14						1	-4.14739
1383869	DRD2	Homo sapiens dopamine receptor D2 (DRD2), transcript variant 1, mRNA.	1813	-2.94631	5.18471e-06						-1.24				1	-4.18631
1386038	CUTL2	Homo sapiens cut-like 2 (Drosophila) (CUTL2), mRNA.	23316	-2.91748	8.58706e-09				-1.3						1	-4.21748
1380884	LOC138046	Homo sapiens hypothetical protein LOC138046 (LOC138046), mRNA.	138046	-2.2109	3e-05				-2.11						1	-4.3209
1389215	TUBA4A	Homo sapiens tubulin, alpha 4a (TUBA4A), mRNA.	7277	-2.23902	5.78742e-06				-2.12						1	-4.35902
1389263	SULT4A1	Homo sapiens sulfotransferase family 4A, member 1 (SULT4A1), transcript variant 2, mRNA.	25830	-2.20623	0.00097				-2.16						1	-4.36623
1382574	KCND3	Homo sapiens potassium voltage-gated channel, Shal-related subfamily, member 3 (KCND3), transcript variant 1, mRNA.	3752	-2.03586	0.00131				-2.36						1	-4.39586
1390718	GABBR2	Homo sapiens gamma-aminobutyric acid (GABA) B receptor, 2 (GABBR2), mRNA.	9568	-1.91493	0.00133				-2.57						1	-4.48493
1383279	GAP43	Homo sapiens growth associated protein 43 (GAP43), mRNA.	2596	-2.23119	3e-05				-2.3						1	-4.53119
1386841	FOXA2	Homo sapiens forkhead box A2 (FOXA2), transcript variant 1, mRNA.	3170	-3.43631	4.90686e-06				-1.13						1	-4.56631
1379964	CLSTN2	Homo sapiens calsyntenin 2 (CLSTN2), mRNA.	64084	-3.06617	1.84905e-09								-1.51652		1	-4.58269
1390841	NEFM	Homo sapiens neurofilament, medium polypeptide 150kDa (NEFM), mRNA.	4741	-1.93686	0.00597				-2.65						1	-4.58686
1391092	MCC	Homo sapiens mutated in colorectal cancers (MCC), mRNA.	4163	-1.66016	0.00037						-2.94				1	-4.60016
1391339	ERC2	Homo sapiens ELKS/RAB6-interacting/CAST family member 2 (ERC2), mRNA.	26059	-2.48431	0.00016				-2.17						1	-4.65431
1380582	TMEM100	Homo sapiens transmembrane protein 100 (TMEM100), mRNA.	55273	-1.56916	0.00139						-3.17				1	-4.73916
1380493	PLCH1	Homo sapiens phospholipase C, eta 1 (PLCH1), mRNA.	23007	-3.31664	0.00023	-1.48									1	-4.79664
1391720	PIP5K1B	Homo sapiens phosphatidylinositol-4-phosphate 5-kinase, type I, beta (PIP5K1B), transcript variant 2, mRNA.	8395	-2.30322	0.0015				-2.54						1	-4.84322
1389460	CADPS2	Homo sapiens Ca2+-dependent activator protein for secretion 2 (CADPS2), transcript variant 1, mRNA.	93664	-2.56489	5e-05				-2.69						1	-5.25489
1394314	TH	Homo sapiens tyrosine hydroxylase (TH), transcript variant 2, mRNA.	7054	-3.10318	2e-05				-2.28						1	-5.38318
1394880	DDC	Homo sapiens dopa decarboxylase (aromatic L-amino acid decarboxylase) (DDC), mRNA.	1644	-3.1036	0.00276				-2.75						1	-5.8536
1379413	FGF13	Homo sapiens fibroblast growth factor 13 (FGF13), transcript variant 1B, mRNA.	2258	-2.81629	0.00076				-3.06						1	-5.87629
1386737	KCNJ6	Homo sapiens potassium inwardly-rectifying channel, subfamily J, member 6 (KCNJ6), mRNA.	3763	-3.49781	2.75845e-07				-2.83						1	-6.32781
1394878	NTSR1	Homo sapiens neurotensin receptor 1 (high affinity) (NTSR1), mRNA.	4923	-5.27212	2.14302e-10				-1.18						1	-6.45212
1386708	SLC6A3	Homo sapiens solute carrier family 6 (neurotransmitter transporter, dopamine), member 3 (SLC6A3), mRNA.	6531	-4.18412	2e-05				-3.79						1	-7.97412
